# Supplementary material for: Ni induces the CRR1-dependent regulon revealing overlap and distinction between hypoxia and Cu deficiency responses in Chlamydomonas reinhardtii
Source: Royal Society of Chemistry journal article supplement (doi:10.1039/c6mt00063k), 2016-01-01
Supplement: c6mt00063k1.xlsx [file c6mt00063k1.xlsx]

## Sheet: up
Supplemental Table 1. Transcripts whose abundance changes at least 2.0 fold with a minimum FPKM of 10 in at least 1 strain.
	CRR1 Targets			CRR1 and CRR1Δcys	CRR1Δcys
	Ni-responsive in CRR1 only			CRR1 and crr1												FPKM										Fold change
	Ni-responsive in all strains			crr1						MBH = mutual best hit based on BLAST search						Ni						Cu
																crr1		CRR1		cys		4532		CRR1	crr1	Ni						Cu
classification	gene	symbol	aliases	location	defline	description	PFAM	CDD	notes	Arabidopsis MBH	Description	yeast MBH	Description			plus	minus	plus	minus	plus	minus	minus	plus	minus	minus	crr1	q value	CRR1	q value	cys	q value	4532	CRR1/crr1
protein degradation
	Cre10.g444100			chromosome_10:3380496-3383262	(M=2) PF04564//PF05049 - U-box domain // Interferon-inducible GTPase (IIGP)		Interferon-inducible GTPase (IIGP); U-box domain	Ubox; RING superfamily; ABC_ATPase superfamily; KAAG1 superfamily								7.7299	5.6939	9.85147	4.59834	9.71984	7.5479	4.32342	3.56791	3.40675	3.49686	1.35758	0.411383	2.1424	0.000458597	1.28775	0.421075	1.21175	0.974231
	Cre10.g429000			chromosome_10:1528835-1534021	(M=10) KOG0417 - Ubiquitin-protein ligase		Ubiquitin-conjugating enzyme	UBCc superfamily								23.4099	12.6183	27.4223	10.756	32.9482	28.4256	23.306	30.3493	12.864	2.52937	1.85523	0.266846	2.54949	0.000458597	1.1591	0.667807	0.767925	5.08585
	Cre12.g554750			chromosome_12:7641440-7643232	(M=1) PTHR10666:SF54 - PREDICTED PROTEIN		Ubiquitin family	UBQ superfamily		AT5G57860.2	Ubiquitin-like superfamily protein					77.8892	57.1468	113.185	57.5771	81.5605	68.8273	74.9534	76.7034	87.455	103.121	1.36297	0.233101	1.9658	0.000458597	1.185	0.598312	0.977185	0.848081
	Cre16.g673001	LCI2		chromosome_16:6502755-6508825	(M=1) KOG3011 - Ubiquitin-conjugating enzyme		Kua-ubiquitin conjugating enzyme hybrid localisation domain	Kua-UEV1_localn superfamily		AT4G27030.1	fatty acid desaturase A					79.6838	69.586	102.995	41.1255	104.842	78.2802	97.4001	62.128	137.222	163.94	1.14511	0.79386	2.50441	0.000458597	1.33932	0.349064	1.56773	0.837026
	Cre17.g731800			chromosome_17:4424643-4429059	(M=2) PTHR10913 - FOLLISTATIN-RELATED		Kazal-type serine protease inhibitor domain	KAZAL_FS superfamily								25.7397	17.0529	47.6926	16.0661	39.171	25.3488	10.3139	12.2626	13.3637	63.8462	1.5094	0.0529107	2.96852	0.000458597	1.54528	0.0943418	0.841086	0.209311
	Cre01.g027200		UBC12	chromosome_1:4129936-4133112	(M=1) K10576 - ubiquitin-conjugating enzyme E2 H		Ubiquitin-conjugating enzyme	UBCc superfamily; COG5078		AT1G63800.1	ubiquitin-conjugating enzyme 5	YEL012W	UBiquitin-Conjugating			77.777	68.7888	116.969	51.6445	98.206	62.8437	67.5581	52.2109	56.8368	61.4911	1.13066	0.811367	2.26489	0.000458597	1.5627	0.0877056	1.29395	0.924309
	Cre02.g076950		SUB4	chromosome_2:502339-509412	(M=1) PTHR10795//PTHR10795:SF84 - PROPROTEIN CONVERTASE SUBTILISIN/KEXIN		Subtilase family; PA domain	Peptidases_S8_S53 superfamily		AT5G59090.1	subtilase 4.12					24.1677	16.6793	25.3314	9.93857	23.8627	21.6991	23.6345	19.5047	23.7455	56.8935	1.44896	0.0969723	2.5488	0.000458597	1.09971	0.799796	1.21173	0.417368
	Cre02.g095093			chromosome_2:3340434-3342031	(M=1) PTHR16771 - 26 PROTEASOME COMPLEX SUBUNIT DSS1		DSS1/SEM1 family	DSS1_Sem1 superfamily								82.5291	61.6832	120.196	57.3963	103.56	65.0715	47.7991	47.3997	49.014	59.3264	1.33795	0.28378	2.09414	0.000458597	1.59148	0.0705808	1.00843	0.826175
	Cre09.g407700		CEP1	chromosome_9:6523868-6529029	Cysteine endopeptidase	Cysteine endopeptidases (EC 3.4.22), C1A family (papain-type); similar to protease component of protease-inhibitor complex of Zea mays BAA88898.1; contains N-terminal cathepsin propeptide inhibitor domain (I29) and C-terminal granulin (Cys-rich) domain	Papain family cysteine protease; Granulin; Cathepsin propeptide inhibitor domain (I29)	Peptidase_C1 superfamily; Granulin superfamily; Inhibitor_I29 superfamily		AT1G47128.1	Granulin repeat cysteine protease family protein					547.185	431.231	697.793	349.87	546.467	346.598	242.224	250.675	337.69	224.787	1.26889	0.572601	1.99444	0.000458597	1.57666	0.108963	0.966287	1.50227
	Cre02.g110600	DEG5		chromosome_2:5761799-5765257	DegP-type protease	Serine protease, trypsin family, DegP type (HtrA) (protease Do) most similar to At4g18370 (DegP5) and DegP1 [PMID: 11299370, PMID: 12185496]; has a single PDZ domain; probably localized to chloroplast (thylakoid lumen)		Trypsin_2; Tryp_SPc superfamily								7.1418	4.30237	11.6488	4.61645	8.98359	6.63876	7.08456	6.08534	3.94686	6.52238	1.65997	0.0529107	2.52332	0.000458597	1.3532	0.310772	1.1642	0.605126
	Cre02.g116650			chromosome_2:6517045-6519406	(M=6) PF09409 - PUB domain		PUB domain	PUB superfamily								54.1242	26.3474	75.7819	30.1394	73.2379	42.9265	28.7042	26.9845	20.3976	39.0978	2.05425	0.00307393	2.51438	0.000458597	1.70612	0.037285	1.06373	0.521707
	Cre13.g605200		MMP29	chromosome_13:4800765-4806621	(M=48) PF05548 - Gametolysin peptidase M11		Gametolysin peptidase M11	Peptidase_M7 superfamily								26.7001	13.1217	26.4609	6.77082	46.9714	25.4887	16.827	9.88678	19.4412	63.8596	2.0348	0.00307393	3.90808	0.000458597	1.84283	0.0129658	1.70197	0.304437
	Cre12.g505050			chromosome_12:2605639-2611042	(M=13) PF00646 - F-box domain		F-box domain	F-box superfamily		AT5G41490.1	F-box associated ubiquitination effector family protein					17.2686	6.8533	34.9531	4.64376	40.2127	19.5794	35.1949	37.2147	9.03844	3.93756	2.51975	0.00307393	7.5269	0.000458597	2.05383	0.00317004	0.945726	2.29544
	Cre05.g246300			chromosome_5:1042085-1047197	(M=1) PTHR13554 - 26S PROTEASOME NON-ATPASE REGULATORY SUBUNIT 5-RELATED		Proteasome non-ATPase 26S subunit			AT3G15180.2	ARM repeat superfamily protein					9.94333	5.04599	12.2279	6.06093	16.064	6.48752	9.3605	8.53022	5.30508	5.22108	1.97054	0.00307393	2.0175	0.000458597	2.47614	0.00317004	1.09733	1.01609
	Cre12.g555850			chromosome_12:7525120-7527257	(M=4) KOG0324 - Uncharacterized conserved protein		PPPDE putative peptidase domain	Peptidase_C97 superfamily		AT3G07090.1	PPPDE putative thiol peptidase family protein					12.7392	5.82337	17.8355	6.84543	22.5216	8.86236	9.8811	9.1397	5.60212	9.98675	2.1876	0.00307393	2.60546	0.000458597	2.54126	0.00317004	1.08112	0.560955
	Cre15.g641750			chromosome_15:1290462-1295729	(M=3) PF05495 - CHY zinc finger		CHY zinc finger	zf-CHY superfamily				YKL084W	Helper Of Tim			15.9707	9.98337	22.6068	7.45425	21.5593	8.50545	18.0699	19.918	12.6154	3.62945	1.59973	0.0238442	3.03274	0.000458597	2.53476	0.00317004	0.907215	3.47584
	Cre14.g610950		PBD1	chromosome_14:459161-461761	20S proteasome beta subunit D, type 2	20S proteasome beta subunit D, type 2. Expressed in a transcriptome screen for response to trace levels of cadmium, Simon et al. 2008 [PMID: 1838423]. Previously annotated as PBD1	Proteasome subunit	proteasome_beta_type_2; Ntn_hydrolase superfamily; PRE1		AT4G14800.1	20S proteasome beta subunit D2	YER012W	PRoteinase yscE			127.369	80.4454	188.207	88.3587	165.074	86.5365	90.0336	108.116	105.631	119.051	1.5833	0.0207291	2.13003	0.000458597	1.90757	0.00949967	0.83275	0.887275
	Cre02.g090850	CLPB3		chromosome_2:2340617-2348785	ClpB chaperone, Hsp100 family	ClpB chaperone, Hsp100 family; probably chloroplastic or mitochondrial, by homology to At5g15450 and At2g25140 (PMID: 17144892)	Clp amino terminal domain; ATPase family associated with various cellular activities (AAA); AAA domain (Cdc48 subfamily); C-terminal, D2-small domain, of ClpB protein	AAA; ABC_ATPase superfamily; ClpB_D2-small superfamily; Clp_N superfamily; chaperone_ClpB		AT5G15450.1	casein lytic proteinase B3	YDR258C	Heat Shock Protein			46.6307	28.7134	64.7208	27.5458	68.4786	29.9859	39.742	35.8192	27.6872	19.1383	1.624	0.00307393	2.34957	0.000458597	2.28369	0.00317004	1.10952	1.44669
	Cre12.g498500	DEG11	DEG1C	chromosome_12:3243768-3247710	DegP-type protease	(HtrA) similar to DegP protease; serine protease, trypsin family, DegP type (HtrA) (protease Do) most similar to At4g18370 (DegP5, localized in thylakoid membrane, lumen side [PMID: 15137941]; probably results from a recent duplication of DEG5 gene; one C	Trypsin	PDZ_serine_protease; Tryp_SPc superfamily		AT3G27925.1	DegP protease 1					41.6544	13.673	142.983	13.2098	157.685	77.2193	42.1337	39.9941	20.617	6.70118	3.04647	0.00307393	10.824	0.000458597	2.04204	0.00317004	1.0535	3.07662
	Cre16.g652200		MMP9	chromosome_16:1401331-1408423	Metalloproteinase of VMP family	Belongs to the large VMP-family of metalloproteinases (identified in Volvox); the binding site of the catalytic metal ion in VMPs is QExxHxxGxxH not HExxHxxGxxH, therefore VMPs prefer copper for activity rather than zinc; extracellular matrix glycoprotein	Gametolysin peptidase M11	Peptidase_M7 superfamily								42.0983	19.7155	95.0328	32.0186	120.729	57.4251	3.71839	3.28549	11.6741	1.59573	2.13529	0.00307393	2.96805	0.000458597	2.10237	0.00317004	1.13176	7.31584
	Cre06.g269950		CDC48	chromosome_6:2643755-2650925	Protein involved in ubiquitin-dependent degradation of ER-bound substrates	Flagellar Associated Protein with conserved AAA domain ; higher plant homologue is involved in formation of ER in the cell division plane during cytokinesis (PMID: 12427991); CDC48 (p97) functions as an hexameric complex presenting ER-bound substrates eit	Cell division protein 48 (CDC48), N-terminal domain; Cell division protein 48 (CDC48), domain 2; ATPase family associated with various cellular activities (AAA)	Vps4_C superfamily; Thioredoxin_like superfamily		AT3G53230.1	ATPase, AAA-type, CDC48 protein	YDL126C	Cell Division Cycle			166.04	103.091	228.318	114.747	211.469	93.2994	64.0288	65.5719	69.654	95.0672	1.61062	0.036295	1.98975	0.000458597	2.26656	0.00317004	0.976467	0.732682
	Cre06.g281350		LON1	chromosome_6:5142745-5151728	Mitochondrial LON protease	Belongs to MEROPS peptidase family S16 of ATP-dependent proteases; similar to mitochondrial LON protease homolog from Arabidopsis thaliana	ATPase family associated with various cellular activities (AAA); ATP-dependent protease La (LON) domain; Lon protease (S16) C-terminal proteolytic domain	ABC_ATPase superfamily; ChlI superfamily; PORR superfamily; Lon_protease		AT3G05790.1	lon protease 4	YBL022C	ATP-dependent Lon protease PIM1 LON1			17.9583	9.00115	19.0328	10.7263	23.2304	9.19112	15.2012	15.055	20.872	14.2051	1.99511	0.00307393	1.7744	0.000458597	2.52748	0.00317004	1.00971	1.46933
	Cre16.g662450			chromosome_16:2712325-2717089	(M=4) KOG0324 - Uncharacterized conserved protein		PPPDE putative peptidase domain	Peptidase_C97 superfamily								16.1453	0.992458	7.16466	0.747442	40.1929	1.52138	1.30543	1.20324	0.711096	0.657302	16.268	0.00307393	9.58557	0.000458597	26.4187	0.00317004	1.08493	1.08184
	Cre01.g030850		POA4	chromosome_1:4528372-4531761	20S proteasome alpha subunit D	20S proteasome alpha subunit D (type 7)	Proteasome subunit A N-terminal signature	proteasome_alpha_type_7; Ntn_hydrolase superfamily		AT5G66140.1	proteasome alpha subunit D2	YOL038W	proteasome core particle subunit alpha 4			70.9228	44.1244	95.2832	58.5651	88.1552	45.0084	46.8548	51.0274	46.8127	51.1209	1.60734	0.0156857	1.62696	0.00118176	1.95864	0.00317004	0.918228	0.915725
	Cre01.g018900			chromosome_1:3058875-3065307	(M=1) PTHR11685//PTHR11685:SF61 - RBR FAMILY (RING FINGER AND IBR DOMAIN-CONTAINING) // SUBFAMILY NOT NAMED		RWD domain; IBR domain	RING superfamily; IBR superfamily; RWD superfamily		AT1G32340.1	NDR1/HIN1-like 8	YML068W				8.31348	5.2979	14.6367	5.26546	15.2501	9.17214	11.3927	10.9191	6.66841	6.11091	1.5692	0.0495065	2.77976	0.000458597	1.66265	0.034456	1.04337	1.09123
	Cre09.g409050		OTU6	chromosome_9:6737874-6742084	(M=2) PTHR13312 - HIV-INDUCED PROTEIN-7-LIKE PROTEASE		OTU-like cysteine protease	OTU superfamily		AT1G50670.1	OTU-like cysteine protease family protein	YFL044C	YOD1			17.3992	9.85269	18.911	10.1168	24.9607	10.202	7.66458	11.3485	6.85094	7.52466	1.76593	0.00307393	1.86927	0.000458597	2.44665	0.00317004	0.675383	0.910465
	Cre16.g651350			chromosome_16:1264421-1273527				UBQ superfamily		AT4G30790.1						9.77184	6.17223	10.0033	4.51922	14.5759	7.20783	14.6898	11.9106	9.53114	4.70918	1.58319	0.0140123	2.2135	0.000458597	2.02223	0.00317004	1.23334	2.02395
	Cre05.g235950			chromosome_5:2529553-2533460						AT3G23420.1	F-box and associated interaction domains-containing protein					4.75166	0.318002	8.56853	0.107733	47.1701	18.3984	5.96315	1.3624	8.17223	139.532	14.9422	0.00307393	79.5349	0.00180338	2.56382	0.00317004	4.37695	0.0585689
	Cre12.g498000			chromosome_12:3289588-3293845				contains F-box domain based on InterPro		AT2G02340.1	phloem protein 2-B8					4.35138	1.7943	12.3994	2.45515	6.78476	2.75158	1.00954	1.35893	0.529994	0.520328	2.42511	0.00307393	5.05036	0.000458597	2.46577	0.00317004	0.742893	1.01858
	Cre10.g424350			chromosome_10:910580-915628	(M=1) KOG1701 - Focal adhesion adaptor protein Paxillin and related LIM proteins		Protein of unknown function (DUF3633); LIM domain	LIM superfamily; DUF3633 superfamily		AT1G19270.1	DA1	YKR090W				5.69852	3.32975	8.49453	4.39706	11.7252	3.84247	2.90419	2.80177	3.9384	2.35902	1.7114	0.0472641	1.93187	0.000458597	3.05147	0.00317004	1.03656	1.66951
	Cre16.g665000		UMP1	chromosome_16:3034251-3035247	(M=1) K11599 - proteasome maturation protein		Proteasome maturation factor UMP1	UMP1 superfamily				YBR173C	Ubiquitin-Mediated Proteolysis			82.987	56.6349	117.023	54.6064	111.334	63.4241	54.1131	61.0587	54.985	64.7982	1.4653	0.0836921	2.14303	0.000458597	1.75539	0.02671	0.886247	0.848558
	Cre06.g304300		POA6	chromosome_6:8042879-8046410	20S proteasome alpha subunit F	20S proteasome alpha subunit F (type 1)	Proteasome subunit	proteasome_alpha_type_1; Ntn_hydrolase superfamily; PRE1		AT1G47250.1	20S proteasome alpha subunit F2	YMR314W	PRoteinase yscE			93.8233	66.3143	137.03	70.237	128.164	71.819	81.9261	83.5046	79.1424	79.4578	1.41483	0.152242	1.95097	0.000458597	1.78454	0.0218061	0.981097	0.996031
	Cre16.g689650		APG8	chromosome_16:3814293-3816219	Autophagy-related protein	Expressed Protein. Conserved protein. Similar to Aut7p/Apg8p, an ubiquitin-like protein that is conjugated to other proteins during autophagy A microtubule-associated protein	Autophagy protein Atg8 ubiquitin like	UBQ superfamily; GABARAP		AT2G05630.1	Ubiquitin-like superfamily protein	YBL078C	AuTophaGy related			149.092	104.235	255.075	78.0408	270.506	151.216	164.902	145.998	130.42	176.371	1.43034	0.121668	3.26848	0.000458597	1.78887	0.0161255	1.12948	0.739464
	Cre08.g358522		CEP5	chromosome_8:61388-67385	Cysteine endopeptidase	Cysteine endopeptidases (EC 3.4.22), C1A family (papain-type); most similar to insect proteinases possibly involved in defense mechanisms (PMID: 10050046); contains N-terminal cathepsin propeptide inhibitor domain (I29) domain; targeted to secretory pathw	Papain family cysteine protease	Peptidase_C1 superfamily								39.3534	30.1818	61.8523	28.2599	49.3593	28.1842	27.6636	25.5365	27.504	35.4704	1.30388	0.354474	2.18869	0.000458597	1.75131	0.024871	1.0833	0.775407
	Cre02.g088400	DEG1	DEG1A	chromosome_2:1996893-2001625	DegP-type protease	(HtrA), similar to DegP protease; serine protease, trypsin family, DegP type (HtrA) (protease Do) most similar to At3g27925 (DegP1) and to degP5, localized in thylakoid membrane, lumen side [PMID: 15137941]; probably results from a recent duplication of D	Trypsin	PDZ_serine_protease; PDZ superfamily; Trypsin_2; Tryp_SPc superfamily; DegQ								20.9049	15.4311	29.9271	10.1106	26.2057	12.8118	8.99513	7.56541	13.3868	14.2015	1.35473	0.24461	2.95997	0.000458597	2.04543	0.00317004	1.18898	0.942633
	Cre17.g730100	RSEP1	RSE1	chromosome_17:4189344-4194305	Intramembrane metalloprotease	Intramembrane metalloprotease related to site-2 protease; contains M50 domain, with HExxH motif embedded in transmembrane helix; homologous to bacterial RseP/YaeL/PsoIVFB involved in transmembrane signaling; could be organelle-targeted, based on presence	Peptidase family M50	S2P-M50 superfamily; Peptidase_M50								11.2231	15.6205	23.5385	9.24503	9.97919	4.53927	39.3607	1.16087	29.6359	5.27094	0.718485	0.195718	2.54607	0.000458597	2.19841	0.00317004	33.9062	5.62251
	Cre04.g226850		ASP1	chromosome_4:3285650-3291728	Pepsin-type aspartyl protease	Aspartic protease, pepsin (A1) family; directed to secretory pathway; previously identified by Almeida, C.M.(2003) Thesis, Department of Zoologia, University of Coimbra, Coimbra, Portugal (Accession number CAE18153)	Eukaryotic aspartyl protease; Saposin-like type B, region 2; Saposin-like type B, region 1	pepsin_retropepsin_like superfamily; SapB_1 superfamily; Asp		AT1G11910.1	aspartic proteinase A1	YPL154C	carboxyPEPtidase Y-deficient			215.41	164.979	430.298	148.908	295.553	169.148	112.383	114.346	104.152	120.985	1.30568	0.40066	2.88969	0.000458597	1.7473	0.0258733	0.982833	0.860867
	Cre11.g467567		UBQ1	chromosome_11:327091-331330	Ubiquitin	Post-translationally modifies proteins to tag them for proteasome-mediated degradation, internalization etc.; contains two ubiquitin domains in tandem (alternatively spliced form contains only one); post-translationally modifies proteins to tag them for p	Ubiquitin family	Ubiquitin; UBQ superfamily								159.212	134.664	184.128	88.8537	194.666	113.417	46.8533	46.8308	76.8591	91.3494	1.18229	0.703507	2.07226	0.000458597	1.71637	0.034456	1.00048	0.841375
	Cre08.g377700			chromosome_8:3848380-3853422	(M=7) PF02190 - ATP-dependent protease La (LON) domain		ATP-dependent protease La (LON) domain	LON superfamily								39.4537	32.1704	65.6775	27.7175	58.5526	27.5583	26.4608	24.1123	14.3222	18.1794	1.2264	0.558638	2.36953	0.000458597	2.12468	0.00317004	1.0974	0.787826
	Cre12.g518800			chromosome_12:4216690-4222449	(M=1) PTHR22992 - VON WILENBRAND FACTOR RELATED		von Willebrand factor type A domain	vWFA_subfamily_ECM; F-box superfamily								14.0357	15.1246	9.60382	1.79468	23.6096	14.4349	22.2547	12.1164	29.3139	76.0883	0.928005	0.907442	5.35127	0.000458597	1.63559	0.0474809	1.83674	0.385262
	Cre07.g331000			chromosome_7:2691142-2694698	(M=1) KOG4761 - Proteasome formation inhibitor PI31					AT3G53970.1	proteasome inhibitor-related					16.1166	11.9195	23.3186	10.2207	19.0621	10.8326	9.59994	10.174	7.9735	13.8655	1.35212	0.31545	2.28151	0.000458597	1.7597	0.0274424	0.943576	0.57506
	Cre04.g226950			chromosome_4:3298742-3300908	(M=1) PTHR12651 - 26S PROTEASOME NON-ATPASE REGULATORY SUBUNIT 9			PDZ superfamily		AT5G57950.1	26S proteasome regulatory subunit, putative	YIL007C				8.46895	6.17414	10.5453	5.76634	13.3165	5.05183	7.32545	7.50789	8.70805	6.1458	1.37168	0.477461	1.82877	0.00241192	2.63598	0.00317004	0.9757	1.41691
	Cre09.g400100			chromosome_9:1142508-1144365	(M=1) PTHR10634 - AN1-TYPE ZINC FINGER PROTEIN		A20-like zinc finger; AN1-like Zinc finger	zf-AN1 superfamily; zf-A20 superfamily		AT4G22820.2	A20/AN1-like zinc finger family protein					215.435	148.504	304.934	119.565	328.515	157.439	130.63	117.257	110.438	118.031	1.4507	0.137758	2.55036	0.000458597	2.08662	0.00317004	1.11405	0.935669
	Cre16.g680350			chromosome_16:5542666-5545578				clpA								4.89782	3.636	10.3044	4.45899	8.73896	5.14273	11.3643	12.0713	7.04402	15.7677	1.34704	0.528822	2.31093	0.000458597	1.69928	0.0461833	0.941431	0.446737
	Cre05.g247851		CEP2	chromosome_5:848124-855992	(M=2) K01376 - cathepsin V [EC:3.4.22.43]		Papain family cysteine protease; Granulin; Cathepsin propeptide inhibitor domain (I29)	Peptidase_C1 superfamily; Inhibitor_I29 superfamily; Granulin superfamily								113.758	104.64	182.247	74.5026	170.838	91.9993	184.068	153.687	92.9693	151.61	1.08714	0.891968	2.44618	0.000458597	1.85695	0.00949967	1.19768	0.613214
	Cre03.g179100			chromosome_3:4847744-4850798	(M=1) PTHR12555:SF9 - UBIQUITIN FUSION DEGRADATION PROTEIN (FRAGMENT)		Ubiquitin fusion degradation protein UFD1; UBX domain	UBQ superfamily; UFD1 superfamily								7.22122	4.52376	8.79157	4.0206	12.8284	4.2849	5.02459	4.79456	3.309	3.96576	1.59629	0.138716	2.18663	0.000458597	2.99386	0.00317004	1.04798	0.834392
	Cre03.g167850			chromosome_3:3542948-3545013	(M=56) PF00651 - BTB/POZ domain		BTB/POZ domain	BTB superfamily	putative substrate adaptors for cullin 3 ubiquitin ligases							73.7274	46.2324	49.5875	23.1608	33.4378	28.8942	123.65	208.475	70.0141	29.0722	1.59471	0.0156857	2.14101	0.000458597	1.15725	0.663769	0.593117	2.40828
	Cre09.g409650			chromosome_9:6802274-6805440	(M=66) PF00097 - Zinc finger, C3HC4 type (RING finger)		Zinc finger, C3HC4 type (RING finger)	RING superfamily								141.304	151.912	139.709	108.853	144.187	68.1509	57.6296	34.6737	105.134	76.5484	0.93017	0.916486	1.28346	0.137436	2.1157	0.00317004	1.66206	1.37343
protein modification
	Cre03.g173300			chromosome_3:4120336-4127915	(M=5) PTHR12042//PTHR12042:SF4 - LACTOSYLCERAMIDE 4-ALPHA-GALACTOSYLTRANSFERASE (ALPHA- 1,4-GALACTOSYLTRANSFERASE) // SUBFAMILY NOT NAMED		Glycosyltransferase sugar-binding region containing DXD motif	Gly_transf_sug superfamily								11.3906	9.01555	20.2987	9.46267	13.6581	7.0215	4.91381	4.21774	5.87667	4.46041	1.26344	0.716415	2.14513	0.00212198	1.94518	0.104467	1.16503	1.31752
	Cre13.g586450		NAT31	chromosome_13:3310440-3313482	(M=46) PF00583 - Acetyltransferase (GNAT) family		Acetyltransferase (GNAT) family	NAT_SF superfamily; RimI								15.3937	7.77734	50.6126	12.041	26.0421	12.3115	50.789	33.3247	13.1342	14.7447	1.9793	0.00307393	4.20336	0.000458597	2.11527	0.00317004	1.52406	0.890774
	Cre02.g110650			chromosome_2:5765377-5772949	(M=4) PF10250 - GDP-fucose protein O-fucosyltransferase		GDP-fucose protein O-fucosyltransferase	O-FucT_like superfamily; Glyco_tranf_GTA_type superfamily; PA14 superfamily; RfaJ								25.0805	13.358	43.3985	13.3904	30.233	18.2496	11.358	10.6073	13.4972	20.1515	1.87756	0.00307393	3.24102	0.000458597	1.65664	0.041582	1.07077	0.669786
	Cre08.g361600			chromosome_8:913219-917468	(M=4) PF10250 - GDP-fucose protein O-fucosyltransferase		GDP-fucose protein O-fucosyltransferase	O-FucT_like superfamily								20.6381	11.4344	28.0243	9.38089	33.1435	18.3302	6.82706	6.46488	13.134	18.1532	1.80491	0.00307393	2.98738	0.000458597	1.80814	0.00773763	1.05602	0.723509
	Cre12.g530000			chromosome_12:5407699-5414615	(M=1) PTHR24057//PTHR24057:SF123 - GLYCOGEN SYNTHASE KINASE-3 ALPHA		Protein kinase domain	PKc_like superfamily; S_TKc								16.8674	15.2054	18.1727	9.84847	19.0972	8.78952	11.7071	8.31692	10.6222	7.59972	1.1093	0.847974	1.84523	0.000833666	2.17272	0.00317004	1.40762	1.39771
	Cre10.g466750		SAT1	chromosome_10:6517205-6521178	Serine O-acetyltransferase	Serine O-acetyltransferase (EC 2.3.1.30); identical to GenBank AAM23309 (PMID 12481091); involved in cysteine and methionine biosynthesis; Target-P predicts plastid targeting. Differs from the published sequence and from the other isoform in the 5' UTR, b	Serine acetyltransferase, N-terminal	LbetaH superfamily; SATase_N superfamily; cysE								39.8221	34.0137	48.0571	28.1127	71.7938	30.246	27.3868	26.4479	26.0399	30.1533	1.17077	0.701396	1.70944	0.000833666	2.37366	0.00317004	1.0355	0.863584
	Cre01.g036000			chromosome_1:5172422-5177015	(M=1) PTHR24349//PTHR24349:SF128 - SERINE/THREONINE-PROTEIN KINASE		Protein kinase domain	PKc_like superfamily; Pkinase								3.9345	3.57688	12.7417	4.49249	5.77831	3.22231	6.51118	2.20867	3.78039	2.48774	1.09998	0.894721	2.83622	0.000458597	1.79322	0.0189368	2.94801	1.51961
	Cre06.g292900			chromosome_6:6465926-6472828	(M=1) PTHR12270//PTHR12270:SF15 - GLYCOSYLTRANSFERASE-RELATED			Glyco_transf_49 superfamily								9.2505	4.8487	14.9764	7.47165	9.04557	7.21705	9.30591	8.34306	12.8768	12.8874	1.90783	0.00307393	2.00443	0.000458597	1.25336	0.472203	1.11541	0.999177
	Cre13.g581150		NAT30	chromosome_13:2591399-2594865	(M=7) PTHR23091//PTHR23091:SF34 - N-TERMINAL ACETYLTRANSFERASE // SUBFAMILY NOT NAMED		Acetyltransferase (GNAT) family	NAT_SF superfamily								14.9306	7.52446	26.1647	16.9327	12.702	12.6548	5.56166	6.51153	28.5975	17.724	1.98428	0.00307393	1.54522	0.00940848	1.00373	0.992365	0.854125	1.61349
	Cre02.g115950			chromosome_2:6445097-6449097	(M=3) PTHR10963 - GLYCOSYL HYDROLASE-RELATED		Glycosyl hydrolases family 16	GH16_laminarinase_like; Glyco_hydrolase_16 superfamily								23.3447	4.96154	41.8492	7.46625	41.7698	25.9158	41.5801	28.6404	22.2881	50.5189	4.70513	0.00307393	5.60512	0.000458597	1.61175	0.0565131	1.4518	0.441183
	Cre19.g751197			scaffold_19:181808-199767	(M=1) PTHR21576:SF2 - UNCHARACTERIZED NODULIN-LIKE PROTEIN		NUC173 domain	NUC173 superfamily								53.3027	21.6492	12.1759	16.5026	10.6716	12.6353	29.5717	30.7551	14.6397	8.76658	2.46211	0.00307393	0.737817	0.0713604	0.844586	0.596648	0.961522	1.66994
molecular chaperones
	Cre09.g396363		TIM14	chromosome_9:4584518-4586890	Presequence translocase-associated protein import motor subunit	TIM14, subunit of the presequence translocase-associated protein import complex (TIM23), which drives the completion of protein transport into the mitochondrial matrix. Also named PAM18	DnaJ domain	DnaJ superfamily		AT2G35795.1	Chaperone DnaJ-domain superfamily protein	YLR008C	Presequence translocase-Associated Motor			30.6298	21.3058	44.3561	22.3287	34.6289	28.6287	31.3454	37.245	33.2306	31.2764	1.43763	0.170654	1.98651	0.000458597	1.20959	0.545654	0.8416	1.06248
	Cre16.g690400	DNJ5		chromosome_16:3899169-3903693	DnaJ-like protein	DnaJ-like protein; similar to Q4DN10 from Trypanosoma cruzi; TargetP predicts both proteins to secretory pathway (reliability score 1 for T. cruzi, score 3 for DNJ5); contains C-terminal J-domain (pfam00226)	DnaJ domain	DnaJ superfamily		AT3G14200.1	Chaperone DnaJ-domain superfamily protein					12.6217	11.406	21.9982	8.34614	16.5805	11.7055	10.8124	11.3528	12.273	9.08805	1.10658	0.857219	2.63573	0.000458597	1.41647	0.202497	0.952399	1.35045
	Cre17.g707950	HEP2		chromosome_17:1614214-1618068	Hsp70 escorting protein, possibly chloroplastic	Similar to Hsp70 escorting protein 1 (HEP1) from yeast mitochondria; HEP1 prevents aggregation of mitochondrial Hsp70s; HEP2 might be targeted to the chloroplast	DNL zinc finger	zf-DNL superfamily		AT5G27280.1	Zim17-type zinc finger protein					14.0495	13.1029	18.5911	9.50928	18.0957	11.6308	12.1618	13.6264	13.6846	16.487	1.07224	0.923228	1.95505	0.000458597	1.55584	0.0929154	0.892517	0.830024
	Cre01.g004900			chromosome_1:912668-915952	(M=4) PTHR11019//PTHR11019:SF30 - THIJ/PFPI		DJ-1/PfpI family	GATase1_Hsp31_like; GAT_1 superfamily; ThiJ								37.431	19.4868	37.5315	7.07587	93.3233	18.0605	53.1691	42.8481	25.5719	80.0368	1.92084	0.00307393	5.30415	0.000458597	5.16726	0.00317004	1.24087	0.319502
	Cre10.g428950			chromosome_10:1515671-1519913	(M=4) PTHR11019//PTHR11019:SF30 - THIJ/PFPI		DJ-1/PfpI family	GATase1_Hsp31_like; GAT_1 superfamily; ThiJ								11.6158	6.62047	10.5641	5.48732	94.0348	15.8501	0.822665	0.643175	4.30998	8.384	1.75453	0.0279521	1.92518	0.000458597	5.93276	0.00317004	1.27907	0.514072
	Cre03.g145787		HSP22C	chromosome_3:640716-642631	Heat shock protein 22C	Small heat shock protein containing an alpha-crystallin domain; N-terminus by TargetP weakly predicted to be chloroplast transit peptide; PMID: 16143837	Hsp20/alpha crystallin family	ACD_sHsps-like; alpha-crystallin-Hsps_p23-like superfamily; IbpA								30.6783	1.95533	41.4045	0.698018	97.7562	11.9844	2.62267	3.17031	1.27608	0.566463	15.6896	0.00307393	59.3172	0.000458597	8.15695	0.00317004	0.82726	2.25272
	Cre14.g617450	HSP22E		chromosome_14:1398587-1400061	Heat shock protein 22E	Small heat shock protein containing an alpha-crystallin domain; N-terminus by TargetP weakly predicted to be chloroplast transit peptide; HSP22E and HSP22F are arranged head-to-head and share 98% identical nucleotide sequence in coding region (96% identic	Hsp20/alpha crystallin family	ACD_sHsps-like; alpha-crystallin-Hsps_p23-like superfamily; IbpA								320.135	38.0884	1049.26	26.9403	981.042	307.706	148.766	181.62	48.4544	11.2226	8.40505	0.00307393	38.9476	0.000458597	3.18824	0.00317004	0.819106	4.31757
	Cre14.g617400	HSP22F		chromosome_14:1396616-1398388	Heat shock protein 22F	Small heat shock protein containing an alpha-crystallin domain; N-terminus by TargetP weakly predicted to be chloroplast transit peptide; HSP22F and HSP22E are arranged head-to-head and share 98% identical nucleotide sequence in coding region (96% identic	Hsp20/alpha crystallin family	ACD_sHsps-like; alpha-crystallin-Hsps_p23-like superfamily; IbpA								216.903	30.7948	442.797	16.4299	495.902	142.204	94.0107	127.079	27.9909	11.4241	7.04349	0.00307393	26.9507	0.000458597	3.48726	0.00317004	0.739782	2.45016
	Cre12.g519350		PHB2	chromosome_12:4260294-4263730	Prohibitin		SPFH domain / Band 7 family	SPFH_prohibitin; SPFH_like superfamily; HflC		AT5G40770.1	prohibitin 3	YGR132C	ProHiBitin			152.734	94.1709	199.909	99.3639	182.09	101.454	45.9741	53.3813	59.8523	72.2676	1.62188	0.00307393	2.01189	0.000458597	1.7948	0.0175038	0.86124	0.828204
	Cre07.g339200			chromosome_7:3929311-3932298				Chaperone_protein_DnaJ		AT3G19220.1	protein disulfide isomerases					13.985	14.3413	21.13	10.1384	14.3143	8.28388	4.61578	3.80821	7.00097	15.891	0.975156	0.974937	2.08416	0.000458597	1.72797	0.024871	1.21206	0.440562
	Cre06.g284900	CYN20-1	CYN6	chromosome_6:5517114-5519585	Peptidyl-prolyl cis-trans isomerase, cyclophilin-type	Peptidyl-prolyl cis-trans isomerase (rotamase), cyclophilin type [PMID: 15051864, PMID:15047905]; secretory pathway; similar to At5g58710 (ROC7, AtCYP20-1) and At2g29960 (Cyp5, AtCYP19-4). Previously annotated as CYN20-1	Cyclophilin type peptidyl-prolyl cis-trans isomerase/CLD	cyclophilin superfamily		AT2G29960.1	cyclophilin 5					247.018	138.742	350.656	160.191	309.307	193.329	84.9411	79.3282	67.7112	122.317	1.78041	0.00307393	2.18899	0.000458597	1.5999	0.074631	1.07076	0.553571
redox
	Cre11.g481200		PHX17	chromosome_11:3477774-3486070	(M=19) PTHR10869 - PROLYL 4-HYDROXYLASE ALPHA SUBUNIT		2OG-Fe(II) oxygenase superfamily	P4Hc; 2OG-FeII_Oxy superfamily								4.62667	4.39095	11.3624	3.98029	4.96545	4.84575	9.38659	4.14415	9.77148	11.2156	1.05368	0.954682	2.85467	0.000458597	1.0247	0.959269	2.26502	0.87124
	Cre10.g456050			chromosome_10:5088119-5092265	(M=4) KOG3135 - 1,4-benzoquinone reductase-like; Trp repressor binding protein-like/protoplast-secreted protein		NADPH-dependent FMN reductase	FMN_red superfamily		AT5G54500.1	flavodoxin-like quinone reductase 1	YCR004C				66.6431	62.0805	94.6348	44.571	68.0463	51.832	43.1803	42.3976	55.5104	118.516	1.07349	0.909776	2.12324	0.000458597	1.31282	0.351574	1.01846	0.468379
	Cre09.g389250		AOF1	chromosome_9:2753400-2757653	Amine oxidase, flavin-containing	Amine oxidase, flavin-containing; amine oxidase:FAD dependent oxidoreductase. Possible polyamine oxidase	Flavin containing amine oxidoreductase	NAD_binding_8; SDR superfamily; Amino_oxidase								10.8492	11.1145	34.5062	15.5155	12.8991	16.0779	123.522	32.0388	32.0148	11.4631	0.97613	0.978495	2.22398	0.000458597	0.802288	0.469897	3.85539	2.79286
	Cre03.g183850	FDX6		chromosome_3:5317758-5320038	Apoferredoxin	Fe2S2 containing redox protein, predicted chloroplast localization [PMID: 19586916]	2Fe-2S iron-sulfur cluster binding domain	fer2 superfamily		AT1G32550.1	2Fe-2S ferredoxin-like superfamily protein					57.9444	40.0837	121.344	51.7377	66.5964	60.1114	142.231	59.1263	203.926	74.4771	1.44559	0.11624	2.34537	0.000458597	1.10788	0.774781	2.40555	2.7381
	Cre01.g039350		NCR2	chromosome_1:5542787-5546603	Cytochrome P450 reductase, possibly CYP505 family	Cytochrome P450 reductase, possibly CYP505B family. In the cytochrome P450 CYP102 family. Previously annotated as NCR2 for NADPH-cytochrome P450 reductase (NADPH-ferrihemoprotein reductase). This is probably alternatively spliced	FAD binding domain; Oxidoreductase NAD-binding domain; Flavodoxin	CYPOR; FNR_like superfamily; Flavodoxin_1; FMN_red superfamily; CysJ		AT4G24520.2	P450 reductase 1	YHR042W				12.3635	9.79176	24.1994	11.0566	15.3556	11.7618	19.5544	13.2537	17.5002	11.3539	1.26264	0.496145	2.18868	0.000458597	1.30555	0.361133	1.47539	1.54134
	Cre05.g234100	CYP745A1	CYP17	chromosome_5:204045-209162	Cytochrome P450, CYP197 superfamily	Cytochrome P450, CYP197 superfamily. Previously annotated as CYP745A1	Cytochrome P450	p450 superfamily								17.8734	14.0545	59.8436	23.3866	19.8795	18.4451	136.937	26.6596	50.8932	17.2601	1.27172	0.453197	2.55888	0.000458597	1.07777	0.845683	5.1365	2.9486
	Cre11.g467527			chromosome_11:40145-45687	Cytochrome P450, CYP710 superfamily; C-22 desaturase	Cytochrome P450, CYP710 superfamily, CYP710A family. Cytochrome P450 CYP710A encodes the sterol C-22 desaturase in Arabidopsis and tomato [PMID: 16531502]. CYP61 of fungi also encodes a C-22 desaturase, and these sequences probably share a common ancesto	Cytochrome P450	CypX;p450 superfamily		AT2G28860.1	cytochrome P450, family 710, subfamily A, polypeptide 4	YMR015C	ERGosterol biosynthesis			41.6261	33.1073	146.579	40.614	56.8838	39.4246	112.797	32.9159	119.373	31.7622	1.25731	0.477066	3.60908	0.000458597	1.44285	0.183081	3.42682	3.75834
	Cre06.g306000		GOX3	chromosome_6:8247467-8254313	Glyoxal or galactose oxidase	The substrate of this oxidase is unsure, as the similarity is to both glyoxal oxidases and galactose oxidases, found in fungi, bacteria, animals and plants (both use the same Tyr radical / metal mechanism); the plant homologues are secreted, but the fate	Domain of unknown function (DUF1929); Glyoxal oxidase N-terminus	E_set superfamily; Glyoxal_oxid_N								4.72717	3.75385	10.1311	4.02931	5.78222	6.82381	24.9558	8.92605	14.2134	7.27028	1.25929	0.561399	2.51435	0.000458597	0.847359	0.62076	2.79584	1.955
	Cre17.g732350		GOX4	chromosome_17:4464679-4473036	Glyoxal or galactose oxidase	The substrate of this oxidase is unsure, as the similarity is to both glyoxal oxidases and galactose oxidases, found in fungi, bacteria, animals and plants (both use the same Tyr radical / metal mechanism); the plant homologues are secreted, but the fate	Domain of unknown function (DUF1929); Glyoxal oxidase N-terminus	E_set_GO_C; SCO; E_set superfamily; Glyoxal_oxid_N; Thioredoxin_like superfamily		AT1G19900.1	glyoxal oxidase-related protein					24.287	16.4743	31.2652	14.2479	28.5933	24.7418	28.6806	24.1934	28.6761	28.3377	1.47424	0.0710722	2.19437	0.000458597	1.15567	0.659703	1.18547	1.01194
	Cre09.g393543		HCP2	chromosome_9:4088069-4092385	Hybrid-cluster protein	Prismane/CO dehydrogenase family	Prismane/CO dehydrogenase family	HCP_like superfamily								43.3445	56.524	21.3358	9.27727	21.9987	14.5352	4.34265	2.04835	13.078	89.1878	0.766834	0.353836	2.29979	0.000458597	1.51348	0.113731	2.12007	0.146634
	Cre03.g172500	PTOX2	PTO2	chromosome_3:4054371-4058797	Plastid terminal oxidase	Alternative oxidase, possibly chloroplast-localized. Previously annotated as PTOX2	Alternative oxidase	Ferritin_like superfamily								41.6298	41.9001	61.355	30.6724	60.2837	38.6956	33.6083	29.635	49.4154	127.517	0.993549	0.993982	2.00033	0.000458597	1.5579	0.0915369	1.13407	0.38752
	Cre16.g657800		CCD3	chromosome_16:2104045-2109759	Carotenoid cleavage dioxygenase	Related to carotenoid 9,10-9',10' cleavage dioxygenase which in land plants participates in abscisic acid biosynthesis; could play a similar role (PMID: 16327238)	Retinal pigment epithelial membrane protein	RPE65 superfamily								7.26607	5.65115	10.1563	4.04026	8.1348	5.91125	7.49141	7.67311	8.21995	10.7635	1.28577	0.526758	2.51377	0.000458597	1.37616	0.291015	0.97632	0.763687
	Cre11.g467540		GOX7	chromosome_11:132495-137407	(M=18) PF07250 - Glyoxal oxidase N-terminus		Domain of unknown function (DUF1929); Glyoxal oxidase N-terminus	E_set superfamily; Glyoxal_oxid_N		AT3G57620.1	glyoxal oxidase-related protein					0.714253	0.931133	11.8252	2.53431	0.845853	1.53735	25.9029	0.715044	17.9903	0.806872	0.767079	0.763339	4.66604	0.000458597	0.550202	0.108963	36.2256	22.2963
	Cre16.g657200			chromosome_16:2053507-2057940	(M=18) PF07250 - Glyoxal oxidase N-terminus		Domain of unknown function (DUF1929); Glyoxal oxidase N-terminus	E_set superfamily; Glyoxal_oxid_N								10.6397	16.8984	179.281	20.4591	37.5361	41.1454	260.999	4.75889	225.005	7.15083	0.629628	0.0289894	8.7629	0.000458597	0.912279	0.809132	54.8445	31.4656
	Cre03.g160200		PHX7	chromosome_3:2541191-2543835	(M=11) 1.14.11.2 - Procollagen-proline dioxygenase.		ShK domain-like; 2OG-Fe(II) oxygenase superfamily	P4Hc; 2OG-FeII_Oxy superfamily; ShK superfamily		AT1G20270.1	2-oxoglutarate (2OG) and Fe(II)-dependent oxygenase superfamily protein					69.816	62.0718	96.5899	46.3447	79.4431	59.2379	35.0409	36.6565	34.7464	48.8614	1.12476	0.821647	2.08416	0.000458597	1.34109	0.300749	0.955926	0.711122
	Cre03.g210513			chromosome_3:9042343-9046301	(M=3) 1.3.1.42 - 12-oxophytodienoate reductase.		NADH:flavin oxidoreductase / NADH oxidase family	OYE_like_FMN; TIM_phosphate_binding superfamily; NemA				YPL171C	Old Yellow Enzyme			20.7922	9.87209	27.2255	9.30804	70.2231	20.6418	29.4303	46.3441	21.1161	11.8629	2.10616	0.00307393	2.92494	0.000458597	3.40199	0.00317004	0.635039	1.78001
	Cre17.g731350		SDR28	chromosome_17:4356223-4360253	(M=16) KOG1208 - Dehydrogenases with different specificities (related to short-chain alcohol dehydrogenases)		short chain dehydrogenase	SDR superfamily; FabG		AT5G61830.1	NAD(P)-binding Rossmann-fold superfamily protein					27.9775	16.6104	42.4928	16.6844	88.3582	18.893	18.4286	18.1338	17.9791	23.1747	1.68434	0.00799222	2.54686	0.000458597	4.67677	0.00317004	1.01626	0.775807
	Cre03.g146447			chromosome_3:823537-827213	(M=2) PTHR23244:SF16 - JASMONATE INDUCIBLE PROTEIN-RELATED		Kelch motif	Kelch_4; Kelch_3 superfamily; PLN02153		AT3G07720.1	Galactose oxidase/kelch repeat superfamily protein					41.2359	16.8219	81.4577	30.2762	15.5847	8.64475	35.3089	7.78849	240.518	48.0182	2.45132	0.00307393	2.69049	0.000458597	1.80279	0.014392	4.53347	5.00889
	Cre03.g155350		PPO4	chromosome_3:1927265-1932452	(M=1) PF00175//PF01243 - Oxidoreductase NAD-binding domain // Pyridoxamine 5'-phosphate oxidase		Pyridoxamine 5'-phosphate oxidase; Oxidoreductase NAD-binding domain	PNPOx_like superfamily; FNR_like superfamily								8.88754	3.63651	4.74082	1.69164	41.6422	3.01382	2.35582	2.44396	2.10998	1.32851	2.44398	0.00307393	2.8025	0.000458597	13.8171	0.00317004	0.963936	1.58823
	Cre13.g569400			chromosome_13:1118317-1121021	(M=3) PTHR10696 - GAMMA-BUTYROBETAINE HYDROXYLASE-RELATED		Taurine catabolism dioxygenase TauD, TfdA family	TauD; CAS_like superfamily								4.6711	1.17416	11.4659	0.267891	24.306	8.02254	5.48006	6.60426	1.69084	1.05637	3.97825	0.00307393	42.8006	0.000458597	3.02971	0.00317004	0.829777	1.60061
	Cre02.g084450		PHX5	chromosome_2:1526630-1530141	(M=11) 1.14.11.2 - Procollagen-proline dioxygenase.		2OG-Fe(II) oxygenase superfamily	P4Hc; 2OG-FeII_Oxy superfamily; ShK superfamily								25.1734	46.4992	203.458	52.8132	72.6728	37.0802	74.6546	2.38507	137.192	12.0704	0.541373	0.00307393	3.85241	0.000458597	1.95988	0.00317004	31.3008	11.366
	Cre10.g466700			chromosome_10:6513582-6517112	(M=1) K06892 - ATP-dependent Clp protease adaptor protein ClpS		2OG-Fe(II) oxygenase superfamily	DIOX_N superfamily; 2OG-FeII_Oxy superfamily; PcbC		AT1G35190.1	2-oxoglutarate (2OG) and Fe(II)-dependent oxygenase superfamily protein					10.5283	6.57171	16.2573	7.13342	23.7412	7.11052	9.64358	7.75494	10.1547	12.9726	1.60206	0.12372	2.27903	0.000458597	3.33888	0.00317004	1.24354	0.782781
	Cre03.g179500		PHX8	chromosome_3:4894433-4898365	(M=19) PTHR10869 - PROLYL 4-HYDROXYLASE ALPHA SUBUNIT		2OG-Fe(II) oxygenase superfamily	P4Hc; 2OG-FeII_Oxy superfamily								5.30399	3.35434	79.0857	8.42486	15.5045	3.65479	65.1409	0.838409	36.8869	0.557579	1.58123	0.147326	9.38718	0.000458597	4.24224	0.00317004	77.6959	66.1555
	Cre06.g310950		FAO7	chromosome_6:8876505-8884766	(M=1) KOG2853 - Possible oxidoreductase		FAD dependent oxidoreductase	SDR superfamily; DadA								33.5728	39.6528	19.9965	5.7219	31.5819	17.0834	29.6177	20.1999	12.292	10.5368	0.846669	0.691993	3.49473	0.000458597	1.84869	0.00949967	1.46623	1.16658
	Cre02.g084400		PHX4	chromosome_2:1523090-1526578	(M=11) 1.14.11.2 - Procollagen-proline dioxygenase.		2OG-Fe(II) oxygenase superfamily	P4Hc; 2OG-FeII_Oxy superfamily; ShK superfamily								2.43454	4.56278	95.4651	12.3384	8.49301	4.04026	91.035	1.41633	85.0024	6.32683	0.533565	0.0352928	7.73723	0.000458597	2.10209	0.00317004	64.2753	13.4352
	Cre09.g395950		AOX1	chromosome_9:1828147-1832062	Alternative oxidase	Alternative oxidase, mitochondrial precursor see gi|9027543|gb|AAC05743.2|[9027543], [PMID: 11405094]	Alternative oxidase	AOX; Ferritin_like superfamily		AT3G22370.1	alternative oxidase 1A					97.205	88.1487	94.4762	39.1222	115.458	53.1726	25.2753	19.1041	45.9696	106.191	1.10274	0.858913	2.4149	0.000458597	2.17138	0.00317004	1.32303	0.432895
	Cre07.g350750	PTOX1	PTO1	chromosome_7:5464249-5469638	Alternative oxidase	Alternative oxidase, possibly chloroplast-localized; quinol-to-oxygen oxidoreductase; shares similarities with plastid terminal oxidase IMMUTANS [PMID: 12227339, PMID: 14503001]. Previously annotated as PTOX1	Alternative oxidase	AOX; Ferritin_like superfamily		AT4G22260.1	Alternative oxidase family protein					71.8218	56.9327	130.878	64.2994	103.333	41.4056	25.2665	22.0883	10.1624	18.2328	1.26152	0.473089	2.03545	0.000458597	2.49563	0.00317004	1.14389	0.557369
	Cre17.g700950	FDX5		chromosome_17:704736-706717	Apoferredoxin	Fe2S2 containing redox protein, predicted chloroplast localization	2Fe-2S iron-sulfur cluster binding domain	fer2 superfamily								0.794127	0.312582	1599.1	6.23193	22.6241	2.72106	2735.51	13.9841	1732.8	0.782322	2.54054	0.383729	256.598	0.000458597	8.31444	0.00317004	195.616	2214.94
	Cre16.g687950	ETFA1	ETF1	chromosome_16:4582777-4586359	Electron transfer flavoprotein alpha subunit	Electron transfer flavoprotein alpha-subunit-like, mitochondrial; The electron transfer flavoprotein serves as a specific electron acceptor for several dehydrogenases, including five acyl-CoA dehydrogenases, glutaryl-CoA and sarcosine dehydrogenase. It tr	Electron transfer flavoprotein domain; Electron transfer flavoprotein FAD-binding domain	ETF_alpha; AANH_like superfamily		AT1G50940.1	electron transfer flavoprotein alpha	YPR004C	Altered Inheritance rate of Mitochondria			14.3662	15.2697	15.7269	7.72143	14.586	8.758	6.03461	4.29367	9.7811	13.1406	0.940831	0.932486	2.03679	0.000458597	1.66545	0.0487176	1.40547	0.744342
	Cre16.g657250		GOX17	chromosome_16:2058819-2063195	Glyoxal or galactose oxidase	The substrate of this oxidase is unsure, as the similarity is to both glyoxal oxidases and galactose oxidases, found in fungi, bacteria, animals and plants (both use the same Tyr radical / metal mechanism); the plant homologues are secreted, but the fate	Domain of unknown function (DUF1929); Glyoxal oxidase N-terminus	E_set superfamily; Glyoxal_oxid_N								14.4214	30.573	86.5449	32.9729	116.751	60.7832	61.9075	3.93722	146.548	6.3663	0.471704	0.00307393	2.62473	0.000458597	1.92078	0.00317004	15.7237	23.0193
	Cre09.g393506		HCP3	chromosome_9:4083848-4088064	Hybrid-cluster protein	Prismane/CO dehydrogenase family	Prismane/CO dehydrogenase family	HCP_like superfamily								26.1463	32.9203	42.8514	15.8895	33.5372	19.3378	4.48497	1.16331	14.7751	12.4441	0.79423	0.481098	2.69684	0.000458597	1.73428	0.0280747	3.85535	1.18732
	Cre02.g095137			chromosome_2:3591545-3600340	Pyruvate-ferredoxin oxidoreductase	Pyruvate-ferredoxin oxidoreductase. COG0674, PorA, Pyruvate:ferredoxin oxidoreductase; pfam01855, Pyruvate flavodoxin/ferredoxin oxidoreductase (= NIFJ), thiamine diP-binding domain suggests it requires thiamine pyrophosphate (TPP) as a co-factor. Previ	Pyruvate ferredoxin/flavodoxin oxidoreductase; Thiamine pyrophosphate enzyme, C-terminal TPP binding domain; Pyruvate flavodoxin/ferredoxin oxidoreductase, thiamine diP-bdg; Domain of unknown function	TPP_PFOR_PNO; TPP_enzymes superfamily; TPP_PYR_PFOR_IOR-alpha_like; TPP_enzyme_PYR superfamily; POR superfamily; EKR superfamily; Fer4_16; HCP_like superfamily; pyruvate_flavodoxin/ferrodoxin_oxidoreductase								40.745	64.9833	76.406	11.4832	15.4382	7.82532	65.2137	11.1658	46.2762	42.7245	0.627007	0.0253412	6.65372	0.000458597	1.97285	0.00568854	5.84049	1.08313
	Cre13.g586600			chromosome_13:3322530-3326122	(M=1) PTHR10106 - CYTOCHROME B561-RELATED		Eukaryotic cytochrome b561	Cyt_b561 superfamily		AT5G38630.1	cytochrome B561-1					6.47603	5.2062	10.1782	4.88138	15.3203	7.01814	5.37255	2.79024	4.57882	9.75743	1.24391	0.699762	2.08511	0.000458597	2.18296	0.00568854	1.92548	0.469265
	Cre09.g408600			chromosome_9:6622075-6624920	(M=2) PF02900 - Catalytic LigB subunit of aromatic ring-opening dioxygenase		Catalytic LigB subunit of aromatic ring-opening dioxygenase	45_DOPA_Dioxygenase; Extradiol_Dioxygenase_3B_like superfamily		AT4G15093.1	catalytic LigB subunit of aromatic ring-opening dioxygenase family					22.9208	20.0354	50.9503	18.2913	52.6403	17.9638	47.5886	12.372	25.661	29.2759	1.14402	0.785072	2.78549	0.000458597	2.93035	0.00317004	3.84648	0.876523
	Cre05.g243450		GOX1	chromosome_5:1562791-1571187	Glyoxal or galactose oxidase	The substrate of this oxidase is unsure, as the similarity is to both glyoxal oxidases and galactose oxidases, found in fungi (both use the same Tyr radical / metal mechanism); the higher plant homologues are secreted, but the fate of the Chlamydomonas is	Domain of unknown function (DUF1929); Glyoxal oxidase N-terminus	E_set_GO_C; E_set superfamily; Glyoxal_oxid_N								56.7223	19.2774	51.979	13.2421	48.0043	38.6556	17.8286	14.7073	65.3828	120.314	2.94242	0.00307393	3.92528	0.000458597	1.24185	0.497418	1.21223	0.543435
	Cre12.g556750		SDR22	chromosome_12:7409647-7413297	Short-chain dehydrogenase/reductase	Short-chain dehydrogenase/reductase. Probably a protochlorophyllide reductase or retinol/estradiol 17beta dehydrogenase. 32 kDa translocon at the inner membrane of chloroplasts, similar to Tic32 from Pisum sativum (AAS38575) and Oryza sativa (ABA9179);	short chain dehydrogenase	SDR superfamily		AT4G23420.3	NAD(P)-binding Rossmann-fold superfamily protein	YOR246C				11.7113	5.98822	17.1671	9.29521	15.1664	10.937	15.2748	14.2063	27.822	16.1968	1.95572	0.00307393	1.84688	0.000458597	1.38671	0.260444	1.07521	1.71775
	Cre12.g546500		TEF22	chromosome_12:8675407-8681279	Predicted protein	Protein with unknown function, mitochondrial localization assumed; present in thylakoid-enriched fraction based on mass spectrometric peptide identification [PMID: 17078018]	DOMON domain; Eukaryotic cytochrome b561	DOMON_like superfamily; Cyt_b561_FRRS1_like		AT3G07570.1	Cytochrome b561/ferric reductase transmembrane with DOMON related domain					92.9014	37.7484	90.0081	132.823	36.1321	94.7945	20.9901	19.7463	324.443	108.677	2.46107	0.00307393	0.677654	0.0140069	0.381162	0.00317004	1.06299	2.98539
	Cre05.g241400			chromosome_5:3450043-3458819	(M=4) PTHR11972 - NADPH OXIDASE		Ferric reductase like transmembrane component; FAD-binding domain	Ferric_reduct superfamily; FNR_like superfamily; NOX_Duox_like_FAD_NADP								15.6255	5.61235	15.7207	12.8627	7.24871	8.22686	9.9644	7.13855	41.6314	16.7979	2.78413	0.00307393	1.22219	0.273807	0.881103	0.716853	1.39586	2.47837
	Cre05.g232002			chromosome_5:618132-629198	(M=3) 1.3.3.6 - Acyl-CoA oxidase.		Acyl-CoA oxidase	ACAD superfamily								111.184	100.41	118.843	86.5803	90.7276	43.5608	49.3717	40.6097	30.5421	22.7315	1.1073	0.861994	1.37263	0.0517632	2.08278	0.00317004	1.21576	1.3436
transport
	Cre05.g245158			chromosome_5:3484833-3499968	(M=3) PTHR10803 - ARSENICAL PUMP-DRIVING ATPASE (ARSENITE-TRANSLOCATING ATPASE)		Anion-transporting ATPase	ArsA; ABC_ATPase superfamily; ArsA_ATPase								11.9846	9.94964	17.8636	8.82747	17.1641	12.1744	6.47075	5.76994	7.3072	5.78314	1.20453	0.640723	2.02364	0.000458597	1.40985	0.215422	1.12146	1.26354
	Cre13.g572200			chromosome_13:1447329-1452573	(M=1) PF03222 - Tryptophan/tyrosine permease family		Tryptophan/tyrosine permease family	SLC5-6-like_sbd superfamily	tyrosine	AT5G19500.1	Tryptophan/tyrosine permease					16.7289	11.9838	26.468	13.1279	17.3061	12.1866	7.04495	9.71184	8.03545	9.86754	1.39596	0.199534	2.01616	0.000458597	1.42009	0.194941	0.725398	0.814332
	Cre07.g325731			chromosome_7:1834571-1838875	(M=5) PF01925 - Sulfite exporter TauE/SafE		Sulfite exporter TauE/SafE	TauE superfamily								12.1384	12.3766	15.007	5.31445	16.8146	10.4771	5.03265	4.8527	4.39413	7.094	0.980754	0.983809	2.82381	0.000458597	1.60489	0.0507602	1.03708	0.619415
	Cre06.g298750		AOT4	chromosome_6:7302690-7308284	Amino acid transporter	Belongs to AAAP family of amino acid/auxin permeases; most similar to plant and fungal relatives	Transmembrane amino acid transporter protein	SLC5-6-like_sbd superfamily								6.97115	5.29075	11.6093	4.44636	21.9545	18.815	35.7072	34.0347	6.86992	3.47122	1.31761	0.42249	2.61097	0.000458597	1.16686	0.64277	1.04914	1.97911
	Cre10.g434650	CTR3		chromosome_10:2302472-2307474	Copper transport accessory protein	Copper transport related; high similarity to CTR type copper ion transporter CTR2 (q.v.), of which it is a close neighbour in the genome (33.5 kb away); has the motif MxxxM-X13-GxxxG per Vinzenz Unger, but appears to lack TM2 and TM3; appears to have clea										8.41409	9.42648	136.601	32.4384	28.9761	27.0198	172.327	14.8023	216.239	6.97281	0.892601	0.841276	4.21109	0.000458597	1.0724	0.857478	11.6419	31.0117
	Cre13.g570600	CTR1		chromosome_13:1254125-1259806	CTR type copper ion transporter	CTR type copper ion transporter. Characterized by Page et al. 2009 [PMID: 19318609].	Ctr copper transporter family	Ctr superfamily				YPR124W	Copper TRansport			4.5374	4.23667	51.733	19.1772	24.5136	15.3025	42.2321	12.8469	51.2155	5.03142	1.07098	0.934978	2.69763	0.000458597	1.60193	0.06168	3.28734	10.1791
	Cre03.g172300		MPC1	chromosome_3:4038855-4041637	Mitochondrial phosphate carrier protein	Similar to mitochondrial phosphate carrier, mitochondrial inner membrane protein, transfers inorganic phosphate into matrix; this is a minor isoform generated by an intron in exon one, with non-canonical splice sites (CT/CG); different N-terminal sequence	Mitochondrial carrier protein	Mito_carr superfamily		AT5G14040.1	phosphate transporter 3;1	YER053C	PI Carrier			285.181	211.411	370.876	184.888	303.065	218.072	323.245	471.842	284.919	419.206	1.34894	0.308476	2.00595	0.000458597	1.38975	0.268339	0.68507	0.679663
	Cre10.g445000	SLT2		chromosome_10:3489762-3495854	Sodium/sulfate co-transporter	SAC1-like transporter 2, putative sodium/sulfate co-transporter, transcript is up-regulated during sulfur-deprivation; related to the SAC1 protein which regulates sulfur-deficiency responses [PMID: 16307308]	Citrate transporter; TrkA-C domain	ArsB_NhaD_permease superfamily; TrkA_C superfamily; CitT								8.56235	6.04951	19.9894	5.6786	17.3459	21.1116	10.2314	14.7784	5.66341	4.51152	1.41538	0.217989	3.52013	0.000458597	0.821629	0.543393	0.692321	1.25532
	Cre10.g445050	SLT3		chromosome_10:3495902-3502674	Sodium/sulfate co-transporter	SAC1-like transporter 3, putative sodium/sulfate co-transporter, transcript is down-regulated during sulfur-deprivation; related to the SAC1 protein which regulates sulfur-deficiency responses [PMID: 16307308]	Citrate transporter; TrkA-C domain	ArsB_NhaD_permease superfamily; TrkA_C superfamily; CitT								30.761	24.6468	45.3063	22.2988	38.1911	32.3318	13.2312	12.486	24.6746	13.7504	1.24807	0.504162	2.03178	0.000458597	1.18122	0.620608	1.05968	1.79446
	Cre17.g723350	SULTR2	SUL2	chromosome_17:3314377-3329585	Sulfate anion transporter	Similar to Arabidopsis Sultr4;1. Previously annotated as SULTR2	STAS domain; Sulfate transporter family	Sulfate_tra_GLY superfamily; PDR_assoc superfamily; ABC2_membrane superfamily; STAS_SulP_like_sulfate_transporter		AT3G12520.1	sulfate transporter 4;2	YLR092W	SULfate			8.37048	4.31409	15.3017	1.54583	30.7418	30.1845	33.5406	42.6043	14.9205	0.815138	1.94027	0.196367	9.8987	0.000458597	1.01846	0.96756	0.787259	18.3043
	Cre17.g723500			chromosome_17:3346461-3359038	(M=7) PTHR19241:SF10 - ATP-BINDING CASSETTE TRANSPORTER (PDR)		ABC-2 type transporter; Plant PDR ABC transporter associated; ABC transporter									7.57789	11.2595	17.5515	8.86763	8.24723	9.66517	19.4421	3.1876	35.1947	6.49399	0.673022	0.0645691	1.97928	0.000458597	0.853294	0.623115	6.09929	5.41958
	Cre07.g355900			chromosome_7:6143825-6147427				MATE_like superfamily								10.5454	7.1564	12.4913	6.01941	13.791	9.27293	11.0059	12.0585	8.14292	7.97155	1.47356	0.1692	2.07517	0.000458597	1.48723	0.146229	0.912709	1.0215
	Cre02.g095200			chromosome_2:3707005-3714197	(M=1) PTHR19211:SF30 - PREDICTED PROTEIN		ABC transporter	ABCF_EF-3; ABC_ATPase superfamily; ABC_tran_2 superfamily; Uup								5.84099	2.85648	15.7788	2.17283	17.3836	8.99175	13.686	11.8283	6.17613	3.95895	2.04482	0.00561953	7.26187	0.000458597	1.93328	0.00317004	1.15706	1.56004
	Cre12.g512200		MFT26	chromosome_12:1785904-1792708	(M=1) PTHR24003//PTHR24003:SF187 - MAJOR FACILITATOR SUPERFAMILY DOMAIN-CONTAINING PROTEIN-RELATED		Major Facilitator Superfamily	MFS superfamily		AT5G13750.1	zinc induced facilitator-like 1	YCR023C				9.83782	6.85566	17.2391	3.06101	20.0512	11.1975	7.21804	7.8384	7.53262	3.62525	1.43499	0.156696	5.63183	0.000458597	1.79069	0.0238165	0.920856	2.07782
	Cre10.g434350	CTR2		chromosome_10:2263854-2268812	CTR type copper ion transporter	CTR type copper ion transporter; fits the pattern for TM2 and TM3: MxxxM-X13-GxxxG per Vinzenz Unger. Characterized by Page et al. 2009 [PMID: 19318609].	Ctr copper transporter family	Ctr superfamily								0.395241	0.139424	54.3185	6.39468	10.4259	5.70624	152.732	7.50036	94.887	0.46884	2.83481	1	8.49433	0.000458597	1.82711	0.0129658	20.3633	202.387
	Cre16.g656150			chromosome_16:1924500-1928923	(M=1) PTHR24003//PTHR24003:SF218 - MAJOR FACILITATOR SUPERFAMILY DOMAIN-CONTAINING PROTEIN-RELATED // SUBFAMILY NOT NAMED		Major Facilitator Superfamily	MFS superfamily		AT2G16970.1	Major facilitator superfamily protein					24.3709	17.5421	26.0881	13.5385	38.3992	19.2017	15.4227	15.8955	6.42883	4.9566	1.38928	0.199844	1.92696	0.000458597	1.99978	0.00317004	0.970256	1.29702
	Cre09.g396950		CGL15	chromosome_9:1693498-1699554	Sodium-dependent phosphate transporter, major facilitator superfamily	Sodium-dependent phosphate transporter, major facilitator superfamily. Green-lineage conserved expressed protein. Previously annotated as CGL15	Major Facilitator Superfamily	Probable_glucarate_transporter; MFS superfamily		AT5G20380.1	phosphate transporter 4;5					51.8974	39.9922	72.3956	37.6715	64.6508	26.371	32.1077	32.0961	24.6539	21.1223	1.29769	0.389746	1.92176	0.000458597	2.45159	0.00317004	1.00036	1.1672
	Cre17.g743547			chromosome_17:6600762-6608673	(M=2) PTHR19241:SF23 - ATP-BINDING CASSETTE TRANSPORTER		ABC-2 type transporter; ABC transporter	ABC_ATPase superfamily; SET superfamily; Protein_white; TCR superfamily								15.5333	11.5739	23.8697	7.74321	30.775	15.335	14.4837	18.0246	12.4061	9.47043	1.3421	0.288345	3.08266	0.000458597	2.00685	0.00317004	0.803552	1.30998
	Cre06.g260100		UAA3	chromosome_6:1547638-1550024	(M=2) PTHR10778:SF13 - ADENOSINE 3-PHOSPHO 5-PHOSPHOSULFATE TRANSPORTER 1 (PAPS TRANSPORTER 1)(SOLUTE CARRIER FAMILY 35 MEMBER B2)		UAA transporter family	EamA superfamily; UAA		AT3G46180.1	UDP-galactose transporter 5					63.5803	41.4776	88.7824	43.778	64.3864	49.1034	25.6236	29.396	23.6375	24.9082	1.53288	0.036295	2.02801	0.000458597	1.31124	0.351264	0.87167	0.948985
	Cre12.g530350		IRT2	chromosome_12:5438305-5442687	Iron-nutrition responsive ZIP family transporter	Related to bacterial zupT homologs; physically linked to IRT1; (CrZIP10); PMID: 15710683; PMID: 16766055	ZIP Zinc transporter	Zip superfamily								4.64413	1.75884	26.6603	6.73409	3.89619	2.90474	19.5121	1.06747	70.0713	8.82088	2.64045	0.00307393	3.95901	0.000458597	1.34132	0.386669	18.2788	7.9438
	Cre12.g546550	FEA1		chromosome_12:8671305-8675189	Fe-assimilating protein	High-CO2 inducible, iron-deficiency inducible, periplasmic protein. Changes in expression with light intensity were studied by Long and Merchant 2008 [PMID: 19067961]. Cis-acting regulatory elements were characterized by Fei et al. 2009 [PMID: 19351705].	Low iron-inducible periplasmic protein	Fea1 superfamily								712.41	155.352	695.01	1704.52	438.228	1237.64	179.907	99.1039	2316	1389.89	4.58578	0.00307393	0.407745	0.000458597	0.354084	0.00317004	1.81534	1.66632
	Cre12.g546600	FEA2		chromosome_12:8666911-8670847	Fe-assimilating protein	High-CO2 inducible, periplasmic protein. Cis-acting regulatory elements were characterized by Fei et al. 2009 [PMID: 19351705].	Low iron-inducible periplasmic protein	Fea1 superfamily								296.248	66.5301	125.158	168.702	87.7242	194.262	5.89102	4.05302	631.498	134.334	4.45284	0.00307393	0.741888	0.100915	0.451577	0.00317004	1.45349	4.70095
	Cre03.g174050		MRP4	chromosome_3:4200174-4215235	ABC transporter, multidrug resistance associated protein	Putative ABC transporter, MRP subfamily, membrane protein PMID: 15710683	ABC transporter	ABC_membrane superfamily; ABC_ATPase superfamily; CFTR_protein								9.25438	8.78623	8.51661	7.52713	15.8787	7.73494	8.86707	10.1008	8.42604	7.50243	1.05328	0.941081	1.13146	0.520153	2.05285	0.00317004	0.877858	1.12311
	Cre04.g228650			chromosome_4:3611940-3635046	(M=10) KOG0054 - Multidrug resistance-associated protein/mitoxantrone resistance protein, ABC superfamily		ABC transporter	ABC_membrane superfamily; ABC_ATPase superfamily; CFTR_protein		AT2G34660.2	multidrug resistance-associated protein 2					5.62365	4.21403	5.00431	5.11906	13.1025	3.77629	4.71195	3.93879	5.35422	4.27731	1.33451	0.33898	0.977584	0.923667	3.46968	0.00317004	1.19629	1.25177
sulfur metabolism
	Cre08.g365692		SIR4	chromosome_8:1662600-1670554	(M=3) PF01077 - Nitrite and sulphite reductase 4Fe-4S domain		Nitrite/Sulfite reductase ferredoxin-like half domain; Nitrite and sulphite reductase 4Fe-4S domain	NIR_SIR_ferr superfamily	sulfure metabolism	AT5G04590.1	sulfite reductase					218.072	200.003	314.561	155.619	277.724	203.946	149.699	175.86	116.689	115.651	1.09034	0.894721	2.02135	0.000458597	1.36175	0.31165	0.85124	1.00898
	Cre13.g569500			chromosome_13:1126665-1129369	(M=3) PTHR10696 - GAMMA-BUTYROBETAINE HYDROXYLASE-RELATED		Taurine catabolism dioxygenase TauD, TfdA family	TauD; CAS_like superfamily	sulfur							23.9481	18.7053	50.4731	4.65875	52.8181	24.3689	35.3984	19.3486	11.0174	24.3471	1.28028	0.438951	10.834	0.000458597	2.16744	0.00317004	1.82951	0.452514
	Cre16.g693202			chromosome_16:425965-432002	(M=1) 1.8.7.1 - Sulfite reductase (ferredoxin).		Nitrite/Sulfite reductase ferredoxin-like half domain; Nitrite and sulphite reductase 4Fe-4S domain	NIR_SIR superfamily	sulfure metabolism			YJR137C	METhionine requiring			42.8988	30.0351	98.9234	18.7431	68.6271	36.668	94.3778	52.4579	33.0412	16.7564	1.42829	0.172537	5.27786	0.000458597	1.87158	0.00568854	1.79912	1.97186
	Cre03.g174400		CDO1	chromosome_3:4263654-4266596	Cysteine dioxygenase	Cysteine dioxygenase	Cysteine dioxygenase type I	ABD superfamily	cysteine catabolism							9.82706	5.75876	13.2988	3.54639	14.9233	10.2801	13.127	5.92094	8.51592	10.8158	1.70645	0.0384481	3.74995	0.000458597	1.45167	0.168538	2.21705	0.787359
amino acids
	Cre06.g278350		AGD1	chromosome_6:4831561-4834595	Arogenate/prephenate dehydrogenase	Putative arogenate/prephenate dehydrogenase, similarity to putative arogenate dehydrogenase from rice (GenBank BAD53632); predicted plastidic by Target-P and by homology	Prephenate dehydrogenase	SDR superfamily	tyrosine	AT1G15710.1	prephenate dehydrogenase family protein	YBR166C	TYRosine			18.4167	14.6807	32.5412	13.7927	25.45	17.1596	25.7485	24.6178	23.5652	16.8632	1.25448	0.539103	2.35931	0.000458597	1.48313	0.13561	1.04593	1.39743
	Cre06.g278163		ARG9	chromosome_6:3791391-3795573	Acetylornithine aminotransferase	Acetylornithine aminotransferase. Identification of Chlamydomonas ARG9 as acetylornithine aminotransferase: Loppes, R. and Heindricks, R. (1986) Arch. Microbiol. 143:348-352. Plastid resident N-acetyl ornithine aminotransferase [PMID: 19617392]	Aminotransferase class-III	OAT_like; AAT_I superfamily		AT1G80600.1	HOPW1-1-interacting 1	YOL140W	ARGinine requiring			46.4813	33.3643	83.1868	37.6387	65.099	50.7255	72.6287	75.4825	46.1875	28.6299	1.39314	0.183395	2.21014	0.000458597	1.28336	0.411932	0.962193	1.61326
	Cre06.g252650		LEU1S	chromosome_6:467530-469745	Isopropylmalate dehydratase, small subunit	Isopropylmalate dehydratase (EC 4.2.1.33); small subunit, involved in leucine biosynthesis	Aconitase C-terminal domain	Aconitase_swivel superfamily	leucine biosynthesis	AT2G43090.1	Aconitase/3-isopropylmalate dehydratase protein					214.073	174.079	419.844	141.706	299.671	242.808	299.687	313.294	188.802	119.991	1.22975	0.564449	2.96278	0.000458597	1.23419	0.507521	0.956568	1.57347
	Cre17.g726750		SHK1	chromosome_17:3674936-3678190	3-deoxy-D-arabino-heptulosonate 7-phosphate synthetase	3-deoxy-D-arabino-heptulosonate 7-phosphate (DAHP) synthetase (EC 2.5.1.54); predicted mitochondrial by Target-P, but plastidic by homology. Catalyzes the first step of the shikimate pathway (PMID: 12242393; PMID: 16963634). Previously annotated as SHKA	Class-II DAHP synthetase family	DAHP_synth_2 superfamily	tyrosine	AT4G39980.1	3-deoxy-D-arabino-heptulosonate 7-phosphate synthase 1					199.289	189.33	365.524	184.295	289.597	201.055	139.517	145.305	179.619	278.139	1.0526	0.946881	1.98336	0.000458597	1.44039	0.206596	0.960167	0.645789
	Cre01.g009350		AIH2	chromosome_1:1743155-1748134	Agmatine iminohydrolase	Converts agmatin to N-carbamoyl-putrescine; involved in agmatine pathway of polyamine (putrescine) biosynthesis; found in soluble mitochondrial proteome	Porphyromonas-type peptidyl-arginine deiminase	Amidinotransf superfamily		AT5G08170.1	porphyromonas-type peptidyl-arginine deiminase family protein					15.8643	6.30667	33.0375	5.8884	16.3827	6.61828	1.58143	3.37771	2.66992	1.63752	2.51548	0.00307393	5.61061	0.000458597	2.47537	0.00317004	0.468196	1.63047
	Cre10.g423550		ATA2	chromosome_10:830260-835431	(M=1) 4.1.2.5 - L-threonine aldolase.		Beta-eliminating lyase	TA_like; AAT_I superfamily; Beta_elim_lyase	glycine biosynthesis?	AT3G04520.1	threonine aldolase 2	YEL046C	GLYcine requiring			20.0019	12.1475	40.9296	10.5233	46.2897	22.5779	16.7914	16.1707	16.71	15.403	1.64659	0.0140123	3.88943	0.000458597	2.05022	0.00317004	1.03838	1.08485
	Cre16.g680700			chromosome_16:5500611-5503585	(M=6) PTHR11772 - ASPARAGINE SYNTHETASE			Gn_AT_II superfamily		AT3G15450.1	Aluminium induced protein with YGL and LRDR motifs					236.999	268.308	370.801	225.583	541.452	255.51	63.5234	39.2743	185.016	119.485	0.883309	0.825831	1.64375	0.000458597	2.1191	0.00317004	1.61743	1.54845
	Cre01.g029250		AAH1	chromosome_1:4321295-4325362	Aromatic amino acid hydroxylase-related protein	Related to phenylalanine hydroxylase and tryptophan monooxygenase, not usually found in angiosperms	Biopterin-dependent aromatic amino acid hydroxylase	arom_aa_hydroxylase superfamily	tyrosine							14.1461	15.5062	18.2356	7.73494	17.969	9.49313	8.05669	4.91312	9.41961	9.09023	0.912287	0.878818	2.35756	0.000458597	1.89284	0.00949967	1.63983	1.03623
	Cre17.g705700		GGK1	chromosome_17:1297704-1303138	Glutamate 5-kinase	Gamma-glutamyl kinase (GK). Previously annotated as PROB1	PUA domain; Amino acid kinase family	PUA superfamily; Glutamate_5-kinase; AAK superfamily								24.7584	17.229	33.2709	17.1761	21.1379	10.257	1.62327	2.084	16.481	20.0692	1.43702	0.126824	1.93705	0.000458597	2.06083	0.00317004	0.77892	0.821209
	Cre10.g426152			chromosome_10:1179033-1185427	(M=1) PTHR11808:SF9 - METHIONINE GAMMA-LYASE		Cys/Met metabolism PLP-dependent enzyme	AAT_I superfamily								7.61713	7.32648	7.21118	1.66883	11.4267	3.16831	6.95381	4.06035	2.43256	5.37019	1.03967	0.963426	4.3211	0.000458597	3.60656	0.00317004	1.71261	0.452975
	Cre07.g344400			chromosome_7:4644872-4648644	(M=1) PTHR10996:SF50 - PREDICTED PROTEIN		D-isomer specific 2-hydroxyacid dehydrogenase, NAD binding domain; D-isomer specific 2-hydroxyacid dehydrogenase, catalytic domain	PGDH_like_3; SDR superfamily; ACT superfamily; SerA	serine biosynthesis?							133.004	72.3925	204.651	87.5484	218.871	134.159	130.046	104.735	129.808	72.8461	1.83726	0.00561953	2.33758	0.000458597	1.63143	0.0646347	1.24167	1.78195
flagella
	Cre02.g075400			chromosome_2:316275-320189	(M=3) PTHR15907:SF13 - PREDICTED PROTEIN		PLAC8 family	PLAC8 superfamily								42.3926	31.8718	44.9665	19.8452	58.352	44.9172	32.7908	43.4865	23.1868	95.9848	1.3301	0.289272	2.26586	0.000458597	1.2991	0.375484	0.754046	0.241567
	Cre03.g156250	FAP186		chromosome_3:2038268-2040665	(M=2) PTHR15629//PTHR15629:SF2 - SH3YL1 PROTEIN // SUBFAMILY NOT NAMED		Family of unknown function (DUF500)	SYLF superfamily								122.608	85.5841	199.283	99.5213	167.704	114.491	75.2654	79.7133	70.969	76.863	1.4326	0.118403	2.00242	0.000458597	1.46478	0.164257	0.944201	0.923318
	Cre12.g542250	TUB1	RSP19	chromosome_12:9167627-9170277	Beta tubulin 1	Beta-tubulin 1, GI:167458; major constituent of microtubules [PMID: 3460413]; it binds one mole of GTP that is hydrolyzed and alters dynamic instability of the microtubule cytoskeleton. The TUB1 and TUB2 genes encode identical proteins [PMID: 6098820]. T	Tubulin C-terminal domain; Tubulin/FtsZ family, GTPase domain	Tubulin_FtsZ superfamily								712.294	560.823	755.166	342.882	686.304	455.687	307.342	298.996	302.31	610.843	1.27009	0.563062	2.20241	0.000458597	1.50609	0.169869	1.02791	0.494906
	Cre12.g498200	FAP128		chromosome_12:3268919-3271140	Flagellar Associated Protein	Flagellar Associated Protein, found in the flagellar proteome [PMID: 15998802]										27.4874	23.0948	33.5264	16.5153	30.6109	23.3157	32.5026	27.5446	25.8796	47.071	1.1902	0.683269	2.03002	0.000458597	1.31289	0.366571	1.18	0.549799
	Cre13.g573500	FAP95		chromosome_13:1616616-1619116	Flagellar Associated Protein	Flagellar Associated Protein; found in the flagellar proteome [PMID: 15998802]; in basal body proteome as BUG12 [PMID: 15964273]. Transcript upregulated during flagellar regeneration [PMID: 15738400]										43.6568	32.9722	44.7265	21.8098	51.95	37.0778	41.208	27.8249	32.5524	71.8913	1.32405	0.323434	2.05075	0.000458597	1.40111	0.236538	1.48098	0.4528
	Cre10.g424250	FAP90		chromosome_10:901530-903901	Flagellar Associated Protein	Flagellar Associated Protein; found in the flagellar proteome [PMID: 15998802]; in basal body proteome as BUG13 [PMID: 15964273]. Transcript upregulated during flagellar regeneration [PMID: 15738400]		DUF4586 superfamily								85.0637	66.9822	85.1802	37.5728	93.0815	62.3868	50.7929	37.5929	54.5857	97.1224	1.26994	0.444788	2.26707	0.000458597	1.49201	0.129377	1.35113	0.56203
	Cre08.g367550	FAP291		chromosome_8:1950528-1952701	Flagellar Associated Protein	Flagellar Associated Protein; found in the flagellar proteome [PMID: 15998802]; transcript upregulated during flagellar regeneration [PMID: 15738400]										116.563	111.847	126.048	59.4154	97.3185	65.0015	40.8483	31.606	38.4859	127.447	1.04216	0.953084	2.12147	0.000458597	1.49717	0.122224	1.29242	0.301976
	Cre12.g536100	FAP126		chromosome_12:6148816-6150511	Flagellar Associated Protein	Flagellar Associated Protein; found in the flagellar proteome [PMID: 15998802]; in basal body proteome as BUG16 [PMID: 15964273]. Transcript upregulated during flagellar regeneration [PMID: 15738400]										111.291	75.5894	132.448	55.2635	170.066	106.383	73.5551	54.7548	49.3917	102.403	1.47231	0.0722915	2.39666	0.000458597	1.59862	0.0714781	1.34335	0.482327
	Cre12.g556300		FBB5	chromosome_12:7455181-7458420	Flagellar/basal body protein	Conserved protein found in ciliated organisms, with unknown function; identified in the flagellar and basal body proteome [PMID: 15137946]; upregulated by deflagellation		DUF4498 superfamily								12.1307	11.2573	16.493	8.45527	13.3854	11.2447	4.25453	2.70015	7.12374	8.5889	1.07759	0.92472	1.95062	0.000458597	1.19037	0.61245	1.57566	0.829412
	Cre14.g617550	DLE3	ODA14	chromosome_14:1403593-1405257	Outer dynein arm-docking complex subunit 3, DC3	Flagellar outer dynein arm-docking complex subunit 3 (ODA-DC3). Contains calcium-binding EF-hand. Previously annotated as ODA14		EFh superfamily; EF-hand_7								28.8608	24.8803	34.3433	16.8536	35.6134	26.5438	18.0202	15.6488	23.9783	50.9849	1.15999	0.738913	2.03774	0.000458597	1.34168	0.298575	1.15154	0.470302
	Cre09.g390615	FAP12		chromosome_9:3667843-3674718	Triacylglycerol lipase and Flagellar Associated Protein	Triacylglycerol lipase. Flagellar Associated Protein, found in the flagellar proteome [PMID: 15998802]. Previously annotated as FAP12	Lipase (class 3)	Esterase_lipase superfamily								143.533	107.182	164.779	83.6218	167.575	103.709	82.3551	59.1612	66.9758	111.283	1.33915	0.336319	1.97053	0.000458597	1.61582	0.0697446	1.39205	0.601851
	Cre04.g217907	FAP79		chromosome_4:315620-323342					Chlamydomonas / Volvox specific							8.76933	7.84184	15.4028	7.63567	10.6577	8.82045	30.0701	13.3277	18.3071	6.72519	1.11827	0.847974	2.01722	0.000458597	1.20829	0.552974	2.25621	2.72217
	Cre02.g113400		BUG21	chromosome_2:6129021-6131674	(M=1) PTHR21207 - PARKIN COREGULATED GENE PROTEIN (PARK2 COREGULATED)		Parkin co-regulated protein	ParcG superfamily								50.5233	41.4478	59.5516	29.8008	65.4897	42.4352	52.9166	41.6001	42.238	93.7012	1.21896	0.576864	1.99832	0.000458597	1.54329	0.102105	1.27203	0.450773
	Cre16.g664500		BBS3B	chromosome_16:2991507-2994142	Bardet-Biedl syndrome-3 associated protein	Expressed Protein. ARF-like GTPase, most similar to mammalian ARL6, no homologues found in angiosperms; homolog of Bardet-Biedl syndrome 3 in humans. May play a role in recruiting and assembling the BBSome onto membranes in flagella (see PMID: 20207729)	ADP-ribosylation factor family	ABC_ATPase superfamily; SAR								14.4715	12.3608	21.366	10.4367	17.2388	15.3071	18.0277	19.7648	13.307	24.0516	1.17076	0.764561	2.0472	0.000458597	1.1262	0.743128	0.912111	0.553269
	Cre02.g090050	FAP170	FAP285	chromosome_2:2247736-2252094	Flagellar Associated Protein	Flagellar Associated Protein; found in the flagellar proteome [PMID: 15998802]; transcript upregulated during flagellar regeneration [PMID: 15738400]. This gene model consolidates two v3 gene models: FAP170 and FAP285; unclear if this gene model should b										43.7235	28.1958	42.1464	17.4552	42.9894	26.2517	45.8383	44.0818	19.155	8.64749	1.55071	0.0303427	2.41455	0.000458597	1.63759	0.048043	1.03985	2.21509
	Cre13.g583450		EZY17	chromosome_13:2878237-2881535	(M=12) PF04749 - PLAC8 family		PLAC8 family	PLAC8 superfamily		AT1G52200.1	PLAC8 family protein					51.3531	47.9829	76.529	24.4486	85.0296	43.1284	17.3341	11.241	28.5189	48.043	1.07024	0.916171	3.1302	0.000458597	1.97155	0.00317004	1.54204	0.593612
	Cre08.g375050	FAP86		chromosome_8:3496860-3500320	Flagellar Associated Protein	Flagellar Associated Protein, found in the flagellar proteome [PMID: 15998802]										21.7613	16.0779	29.0366	14.3261	34.469	20.5094	40.7022	31.8217	19.6915	36.0542	1.35349	0.288345	2.02683	0.000458597	1.68064	0.0366112	1.27907	0.546164
	Cre11.g467561	FAP222		chromosome_11:294228-296621	Flagellar Associated Protein	Flagellar Associated Protein, found in the flagellar proteome [PMID: 15998802]										47.786	35.9639	59.7944	27.5066	62.7699	33.2958	42.0337	31.5265	36.5883	60.9583	1.32872	0.310445	2.17382	0.000458597	1.88522	0.00317004	1.33328	0.600219
	Cre06.g263550	LCI7		chromosome_6:1921008-1923037	R53.5-related protein	Identified in the flagellar and basal body proteome [PMID: 15137946] and upregulated by deflagellation; putative R53.5-related protein. Low-CO2 and high-light inducible gene LCI7 revealed by cDNA array analyses; regulated by CCM1 [PMID: 15235119]. Acclima		AhpC-TSA_2; Thioredoxin_like superfamily								14.4227	9.99601	26.3828	9.00147	27.0315	15.9316	12.8797	11.7815	11.1837	18.9668	1.44285	0.247952	2.93094	0.000458597	1.69672	0.0408201	1.09321	0.589646
	Cre03.g176833			chromosome_3:4556345-4559889	(M=1) K10355 - actin, other eukaryote		Actin	NBD_sugar-kinase_HSP70_actin superfamily; ACTIN								33.6708	11.5658	54.4566	4.15385	42.8422	40.4323	29.7043	39.3431	34.1607	8.0837	2.91124	0.00307393	13.1099	0.000458597	1.0596	0.879429	0.755007	4.22587
	Cre02.g108450	FAP280		chromosome_2:5523279-5525477	Flagellar Associated Protein, transcriptional coactivator-like	Flagellar Associated Protein similar to Transcriptional Coactivator-Like Protein; found in the flagellar proteome [PMID: 15998802]; transcript upregulated during flagellar regeneration [PMID: 15738400]	Helix-turn-helix; Multiprotein bridging factor 1	HTH_XRE superfamily; MBF1 superfamily		AT2G42680.1	multiprotein bridging factor 1A	YOR298C-A	Multiprotein Bridging Factor			210.777	129.245	320.963	123.355	262.105	181.048	158.804	200.944	114.174	104.231	1.63083	0.0120284	2.60195	0.000458597	1.44771	0.18185	0.79029	1.09539
ROS detoxification
	Cre16.g656600		TRX19	chromosome_16:1982093-1984524	(M=1) K03671 - thioredoxin 1		Thioredoxin	Thioredoxin_like superfamily				YCR083W	ThioRedoXin			21.4874	20.078	23.0747	11.3267	24.3357	19.5006	11.1657	13.0944	14.2831	43.5174	1.0702	0.919152	2.0372	0.000458597	1.24795	0.473812	0.852708	0.328216
	Cre12.g538100		GST9	chromosome_12:6452363-6456562	(M=2) K07393 - putative glutathione S-transferase		Glutathione S-transferase, C-terminal domain	Thioredoxin_like superfamily; GST_C_Omega_like; ECM4		AT4G19880.1	Glutathione S-transferase family protein	YKR076W	ExtraCellular Mutant			15.7795	14.7248	23.7696	11.9044	18.7409	14.6215	17.1707	16.7321	15.9298	33.2457	1.07163	0.922139	1.99671	0.000458597	1.28174	0.419943	1.02621	0.479154
	Cre02.g087700	APX1		chromosome_2:1899261-1903342	Ascorbate peroxidase	L-ascorbate peroxidase, possibly localized to plastid	Peroxidase	ascorbate_peroxidase; plant_peroxidase_like superfamily		AT4G08390.3	stromal ascorbate peroxidase					85.553	70.9903	153.748	72.9994	104.901	73.4918	58.1774	55.9153	84.4885	95.3949	1.20514	0.616656	2.10615	0.000458597	1.42738	0.187857	1.04046	0.885671
	Cre02.g098850	NTR2		chromosome_2:4246406-4252056	NADPH dependent thioredoxin reductase	NADPH-dependent thioredoxin reductase 2, similar to AtNTRA and AtNTRB targeted to cytosol and mitochondria in Arabidopsis due to alternative initiation of transcription. Apparently no alternative initiation of trancription for this NTR in chlamy but prese	Pyridine nucleotide-disulphide oxidoreductase									42.878	47.562	62.035	26.22	42.4611	26.1332	20.8674	6.64745	36.3312	40.082	0.901518	0.84792	2.36594	0.000458597	1.6248	0.057568	3.13916	0.906422
	Cre12.g554850	TRXh1	TRX7	chromosome_12:7633750-7636062	Thioredoxin h2, cytosolic	Thioredoxin h2, cytosolic, splicing variant b. This is the second longest of three splicing variants differing on 3' end. This variant contains an intron in the 3'UTR. Deduced protein similar to splicing variant a. The protein corresponds to the sequenced	Thioredoxin	Thioredoxin_like superfamily				YGR209C	ThioRedoXin			84.0187	66.4787	120.43	55.7055	99.3688	62.5071	45.2205	36.2959	75.4946	129.823	1.26384	0.462098	2.16191	0.000458597	1.58972	0.0714781	1.24588	0.581519
	Cre14.g615000			chromosome_14:1102704-1104985	(M=4) PTHR10173:SF0 - PEPTIDE METHIONINE SULFOXIDE REDUCTASE		SelR domain	SelR superfamily		AT4G21860.3	methionine sulfoxide reductase B 2	YCL033C	peptide Methionine sulfoXide Reductase			108.109	81.9139	130.456	55.0277	125.175	82.456	69.2877	80.3393	80.7591	102.259	1.31979	0.314548	2.37073	0.000458597	1.51808	0.101749	0.862438	0.789751
	Cre15.g636800		GST12	chromosome_15:499072-503304	(M=5) KOG0867 - Glutathione S-transferase		Glutathione S-transferase, N-terminal domain	Thioredoxin_like superfamily; Gst; GST_N_GTT1_like								48.6034	17.9515	104.94	22.0284	70.9464	25.4755	83.5436	75.3481	49.5042	33.8999	2.70748	0.00307393	4.76385	0.000458597	2.78489	0.00317004	1.10877	1.46031
	Cre12.g550400	GRX2		chromosome_12:8232311-8233936	Glutaredoxin, CPYC type	Glutaredoxin 2, CPYC type glutaredoxin, probably cytosolic. PMID: 16328797	Glutaredoxin	GRX_GRXh_1_2_like; Thioredoxin_like superfamily		AT1G77370.1	Glutaredoxin family protein	YDR513W	GlutaRedoXin			80.8119	48.7566	115.908	49.5836	112.718	58.5931	100.96	118.583	87.6572	80.6536	1.65746	0.0120284	2.33763	0.000458597	1.92374	0.00568854	0.851387	1.08684
	Cre16.g688550	GSTS1	GST1	chromosome_16:3658365-3660578	Glutathione S-transferase	Glutathione S-transferases (Sigma class), Gene expression is induced by various oxidative stress conditions [PMID: 17435007; PLANT SCIENCE 168: 747-759]. Possible prostaglandin-D synthase activity. Previously annotated as GSTS1	Glutathione S-transferase, N-terminal domain; Glutathione S-transferase, C-terminal domain	Thioredoxin_like superfamily; Gst								157.195	31.6324	158.223	21.3672	484.945	39.6183	23.8786	17.4171	34.1156	89.7356	4.96943	0.00307393	7.40495	0.000458597	12.2404	0.00317004	1.37099	0.380179
	Cre02.g093800		NRX3	chromosome_2:2736455-2739124	Nucleoredoxin	Related to animal thioredoxin, nucleoredoxin		Thioredoxin_like superfamily								5.01715	2.38632	10.0525	2.0927	7.8532	4.35679	2.27355	2.50685	2.34982	3.12399	2.10246	0.00992138	4.8036	0.000458597	1.80252	0.0301629	0.906935	0.752186
	Cre02.g093750		NRX2	chromosome_2:2732865-2736347	Nucleoredoxin 2	Nucleoredoxin, nuclear thioredoxin-like protein, contains two thioredoxin motifs with a WCPPC active site in each motif.	Redoxin; AhpC/TSA family	TryX_like_TryX_NRX; Thioredoxin_like superfamily; TryX_like_family								24.6922	6.48211	56.8033	4.52485	52.7795	23.4524	11.4756	14.2341	11.2616	1.92766	3.80928	0.00307393	12.5536	0.000458597	2.25049	0.00317004	0.806205	5.84211
	Cre10.g464850	MSRA5		chromosome_10:6255777-6259485	Peptide methionine sulfoxide reductase	Protein-methionine-S-oxide reductase	Peptide methionine sulfoxide reductase	PMSR superfamily								23.3901	14.3191	26.5725	12.733	41.717	19.6797	12.5572	14.324	14.8233	24.2999	1.63349	0.0289894	2.0869	0.000458597	2.1198	0.00317004	0.876655	0.610015
	Cre13.g588150	VTC2		chromosome_13:3552574-3556962	(M=1) KOG2720 - Predicted hydrolase (HIT family)			PLN03103 superfamily	similar to VTC5 from Arabidopsis	AT5G55120.1	galactose-1-phosphate guanylyltransferase (GDP)s;GDP-D-glucose phosphorylases;quercetin 4'-O-glucosyltransferases					54.8828	24.0597	96.0731	40.5971	77.38	26.7218	15.1058	14.095	76.0837	22.6091	2.28111	0.00307393	2.3665	0.000458597	2.89576	0.00317004	1.07171	3.36518
	Cre12.g559800		GST10	chromosome_12:7010765-7013714	(M=1) PTHR10250 - MICROSOMAL GLUTATHIONE S-TRANSFERASE		MAPEG family	MAPEG superfamily		AT1G65820.1	microsomal glutathione s-transferase, putative					134.979	77.7045	161.132	90.9286	279.237	90.1721	70.1966	81.3569	125.457	96.3384	1.73708	0.00307393	1.77207	0.000458597	3.09671	0.00317004	0.862823	1.30225
	Cre08.g380000		UMM7	chromosome_8:4157609-4164543	(M=1) PTHR10108:SF384 - PREDICTED PROTEIN (FRAGMENT)		Methyltransferase domain; Sulfatase-modifying factor enzyme 1	AdoMet_MTases superfamily; FGE-sulfatase superfamily; DinB_2 superfamily; generic_methyltransferase; Methyltransf_31	mononuclear non-heme iron enzyme catalyzing the oxidative coupling between histidine and cysteine							52.6835	33.8567	70.2828	28.5535	92.0767	39.1152	222.589	130.132	102.402	58.614	1.55607	0.0289894	2.46144	0.000458597	2.35399	0.00317004	1.71049	1.74706
	Cre14.g615100			chromosome_14:1108525-1111249	(M=4) PTHR10173:SF0 - PEPTIDE METHIONINE SULFOXIDE REDUCTASE		SelR domain	SelR superfamily								24.6707	15.4833	32.6758	16.6647	35.7637	14.9223	18.9106	26.0427	29.1975	24.7542	1.59337	0.036295	1.96078	0.000458597	2.39666	0.00317004	0.726138	1.1795
	Cre12.g553700		PDO2	chromosome_12:7767472-7770889	(M=1) PTHR13887 - GLUTATHIONE S-TRANSFERASE KAPPA		DSBA-like thioredoxin domain	DsbA_FrnE; Thioredoxin_like superfamily		AT5G38900.1	Thioredoxin superfamily protein					33.4549	22.9037	48.4023	18.0317	101.308	26.3297	25.5533	26.1487	20.635	14.7807	1.46068	0.106867	2.68429	0.000458597	3.84767	0.00317004	0.97723	1.39608
	Cre09.g391900	TRXh2	TRX5	chromosome_9:2372811-2374206	Cytosolic thioredoxin h1	Thioredoxin h1, cytosolic. This protein was previously named Ch1 [PMID: 2040309, PMID: 2191628, PMID: 11538123, PMID: 7632918]. mRNA level regulated by light, circadian clock and heavy metals [PMID: 11898433; PMID: 10436225, PMID: 10398712, PMID: 11538123	Thioredoxin	Thioredoxin_like superfamily								456.835	308.585	668.097	310.572	598.294	344.867	284.68	294.62	286.161	310.139	1.48042	0.0918255	2.15118	0.000458597	1.73485	0.032896	0.966262	0.922686
	Cre10.g458450	GPX5		chromosome_10:5436287-5438246	Glutathione peroxidase	GPX5 has also been called GPXH. GPXH gene expression is induced by singlet oxygen [PMID: 16160847; PMID: 15597886; PMID: 15517390; PMID: 11485197; PMID: 19451016; PMID 19690965]. Homologous to glutathione peroxidase from other organisms. Probably cytosoli	Glutathione peroxidase	GSH_Peroxidase; Thioredoxin_like superfamily				YIR037W	HYdroperoxide Resistance			111.582	75.2857	223.2	49.5286	209.57	77.1656	98.0535	90.3244	57.9197	137.344	1.48211	0.0694497	4.50649	0.000458597	2.71585	0.00317004	1.08557	0.421713
	Cre16.g682725		GST2	chromosome_16:3594795-3597627	Glutathione S-transferase	Expression is induced by various oxidative stress conditions [PMID: 17435007; PLANT SCIENCE 168:747-759], glutathione S-transferase (sigma class) (GST class-sigma) (Glutathione-dependent PGD synthetase) (Prostaglandin-H2 D-isomerase) (Hematopoietic prosta	Glutathione S-transferase, N-terminal domain; Glutathione S-transferase, C-terminal domain	GST superfamily; Thioredoxin_like superfamily								146.476	104.223	195.38	119.797	404.39	137.008	63.674	58.1248	145.966	123.447	1.40541	0.173354	1.63093	0.00298786	2.95158	0.00317004	1.09547	1.18242
	Cre10.g456750		DAR1	chromosome_10:5180736-5183457	(M=1) 1.8.5.1 - Glutathione dehydrogenase (ascorbate).			Thioredoxin_like superfamily; GST		AT1G75270.1	dehydroascorbate reductase 2					23.1685	17.9308	36.274	14.7759	39.3917	19.1117	9.14107	8.01575	14.1576	30.6104	1.29211	0.427276	2.45494	0.000458597	2.06113	0.00317004	1.14039	0.462509
	Cre16.g680454			chromosome_16:7124555-7127877				Thioredoxin_like superfamily; Gst								11.4506	8.91876	17.1843	6.97928	15.9787	7.91531	15.1455	10.7682	4.9623	13.677	1.28388	0.490215	2.46219	0.000458597	2.01871	0.00568854	1.4065	0.362821
	Cre10.g439550			chromosome_10:2827724-2831765	(M=1) PTHR23354//PTHR23354:SF37 - NUCLEOLAR PROTEIN 7/ESTROGEN RECEPTOR COACTIVATOR-RELATED		TLD	TLD superfamily		AT4G39870.2	TLD-domain containing nucleolar protein	YPL196W	OXidation Resistance			43.3465	32.4214	70.2375	34.9215	50.3004	30.8855	22.2709	26.6405	23.608	22.1084	1.33697	0.260832	2.0113	0.000458597	1.62861	0.042995	0.835979	1.06783
	Cre16.g676150	MSD3		chromosome_16:6065925-6069339	Mn superoxide dismutase		Iron/manganese superoxide dismutases, C-terminal domain; Iron/manganese superoxide dismutases, alpha-hairpin domain	SodA								17.5191	5.79083	7.75671	3.96294	20.213	25.2977	4.36999	3.3242	24.7216	101.775	3.02532	0.00307393	1.95731	0.00118176	0.799005	0.472107	1.3146	0.242904
	Cre10.g422300	PRX6		chromosome_10:676379-678971	Thioredoxin dependent peroxidase	Peroxiredoxin Q, chloroplastic thioredoxin dependent peroxidase, chloroplast precursor. Attached to thylakoids in Arabidopsis [PMID: 16507087; PMID: 15531707; PMID: 14976238; PMID: 12529539; PMID: 15890615]	AhpC/TSA family	AhpC; Thioredoxin_like superfamily; PRX_BCP		AT3G26060.1						22.3498	11.347	9.25982	10.6808	24.7782	22.9913	40.3443	59.4884	15.4938	26.0548	1.96967	0.00307393	0.866959	0.5402	1.07772	0.855194	0.678188	0.594662
	Cre17.g712100	MDAR1	PNO2	chromosome_17:2075465-2080872	Pyridine nucleotide-disulphide oxidoreductase	Pfam00070, Pyr_redox, Pyridine nucleotide-disulphide oxidoreductase; COG1251, NirB, NAD(P)H-nitrite reductase; monodehydroascorbate ferredoxin reductase related. Previously annotated as MDAR1	Pyridine nucleotide-disulphide oxidoreductase	Pyr_redox_2; SDR superfamily		AT3G52880.1	monodehydroascorbate reductase 1					72.3122	34.6838	69.8523	75.246	51.581	49.6136	38.7659	38.4896	342.91	76.4146	2.0849	0.00307393	0.928319	0.715583	1.03965	0.920138	1.00718	4.48749
lipid
	Cre14.g630883			chromosome_14:3518298-3525838	(M=3) PF03405 - Fatty acid desaturase		Fatty acid desaturase	Acyl_ACP_Desat; Ferritin_like superfamily								35.1883	24.48	74.9258	25.0523	44.1889	27.8608	80.145	29.4869	39.5368	34.5896	1.43743	0.120537	2.99078	0.000458597	1.58606	0.0787773	2.71799	1.14303
	Cre12.g504350			chromosome_12:2642676-2648211	(M=2) PTHR11614:SF26 - PREDICTED PROTEIN (FRAGMENT)		Putative lysophospholipase	Esterase_lipase superfamily		AT2G39420.1	alpha/beta-Hydrolases superfamily protein	YKL094W				9.29645	7.84688	10.682	5.44283	10.1244	8.90782	8.68532	7.83621	8.99312	12.7899	1.18473	0.731459	1.96258	0.000458597	1.13657	0.721417	1.10836	0.703142
	Cre13.g604700			chromosome_13:4724797-4727503	(M=2) KOG1617 - CDP-alcohol phosphatidyltransferase/Phosphatidylglycerol-phosphate synthase		CDP-alcohol phosphatidyltransferase	CDP-OH_P_transf superfamily		AT4G04870.1	cardiolipin synthase	YDL142C	CaRDiolipin synthase			11.1078	9.8953	36.2973	10.5535	12.031	9.36529	28.4674	9.99839	21.0219	12.8932	1.12253	0.84451	3.43936	0.000458597	1.28464	0.411507	2.8472	1.63046
	Cre08.g365950			chromosome_8:1714942-1724251	(M=8) PF03982 - Diacylglycerol acyltransferase		Diacylglycerol acyltransferase	LPLAT superfamily; B12-binding_like superfamily; Abhydrolase_6		AT3G26840.1	Esterase/lipase/thioesterase family protein					5.31181	4.10649	9.89822	4.28502	8.03987	5.2478	6.01068	7.44523	5.23939	5.47177	1.29352	0.487323	2.30996	0.000458597	1.53205	0.103057	0.80732	0.957531
	Cre02.g095106			chromosome_2:3400301-3404724	(M=4) PTHR14269 - CDP-DIACYLGLYCEROL--GLYCEROL-3-PHOSPHATE 3-PHOSPHATIDYLTRANSFERASE-RELATED		CDP-alcohol phosphatidyltransferase	CDP-OH_P_transf superfamily								35.0252	27.9023	53.9598	26.0464	39.4593	25.3528	11.957	12.4551	14.0543	21.8333	1.25528	0.483687	2.07168	0.000458597	1.55641	0.0858495	0.960008	0.643709
	Cre13.g590500	FAD6	DES6	chromosome_13:3900217-3904765	Omega-6-fatty acid desaturase, chloroplast isoform	Omega-6-FAD, chloroplast isoform [PMID: 9498569]. Also known as DES6	Fatty acid desaturase	Delta12-FADS-like; Membrane-FADS-like superfamily		AT4G30950.1	fatty acid desaturase 6					868.893	1115.6	1336.25	386.647	1255.93	899.274	3404.47	1447.27	1590.24	2325.55	0.778857	0.576692	3.45599	0.000458597	1.3966	0.325473	2.35234	0.683812
	Cre12.g502250	PLAP4	PLP4	chromosome_12:2847456-2850836	Plastid lipid associated protein	Conserved expressed protein related to plastid lipid associated protein PAP (PMID: 16461379); some similarity to Arabidopsis protein gi|15241221|ref|NP_197494.1. Previously annotated as PLAP4	PAP_fibrillin	PAP_fibrillin superfamily		AT5G19940.1	Plastid-lipid associated protein PAP / fibrillin family protein					16.4297	16.1946	22.747	11.5033	16.9513	14.1527	22.8179	15.0023	25.0821	26.9309	1.01452	0.988129	1.97743	0.000458597	1.19774	0.578463	1.52096	0.93135
	Cre10.g442200		ERG26	chromosome_10:3171015-3173346	3-beta hydroxysteroid dehydrogenase/epimerase	3-beta hydroxysteroid dehydrogenase/epimerase. This is an NAD-dependent epimerase/dehydratase (see NED series). Previously annotated as ERG26	3-beta hydroxysteroid dehydrogenase/isomerase family	SDR superfamily; Epimerase								8.93911	7.51541	14.9813	7.57197	13.2572	9.42074	10.4464	10.594	7.26549	8.56668	1.18944	0.757257	1.97852	0.000458597	1.40724	0.2374	0.986068	0.84811
	Cre17.g734644			chromosome_17:4959481-4967303	(M=1) 1.14.99.7 - Transferred entry: 1.14.13.132.		FAD dependent oxidoreductase; Squalene epoxidase	SDR superfamily		AT1G58440.1	FAD/NAD(P)-binding oxidoreductase family protein	YGR175C	ERGosterol biosynthesis			18.2918	18.0444	85.8119	22.3809	29.5877	20.8421	166.64	25.4192	73.543	17.598	1.01371	0.988352	3.83416	0.000458597	1.41961	0.198975	6.55567	4.17905
	Cre12.g500500	SMT2	SMT1	chromosome_12:3053903-3057455	Sterol-C24-methyltransferase	Similar to sterol-C24-Methyltransferase from Arabidopsis. Previously annotated as SMT1 but this conflicts with a series of smt mutants identified by Fang and Umen as suppressors of MAT3 size control	Methyltransferase domain; Sterol methyltransferase C-terminal	AdoMet_MTases superfamily; Sterol_MT_C superfamily		AT1G76090.1	sterol methyltransferase 3	YML008C	ERGosterol biosynthesis			255.853	184.585	571.53	268.641	409.767	274.2	347.582	174.328	261.929	149.65	1.3861	0.210576	2.12749	0.000458597	1.49441	0.159468	1.99384	1.75028
	Cre02.g113050			chromosome_2:6086415-6089119	(M=9) PTHR23344 - GLYCEROPHOSPHORYL DIESTER PHOSPHODIESTERASE		Glycerophosphoryl diester phosphodiesterase family	PI-PLCc_GDPD_SF superfamily; UgpQ				YPL206C	Phosphatidyl Glycerol phospholipase C			8.2648	7.07967	12.0662	6.09752	11.1768	7.5224	7.9632	8.1729	8.29764	8.73704	1.1674	0.807048	1.97887	0.000458597	1.4858	0.174014	0.974342	0.949708
	Cre03.g146287			chromosome_3:770237-774023				Esterase_lipase superfamily								7.55831	6.48475	11.3638	3.45786	8.09143	5.05164	5.81261	5.5738	2.51129	6.65226	1.16555	0.776661	3.28637	0.000458597	1.60174	0.0901194	1.04285	0.377509
	Cre16.g659350		CYB1	chromosome_16:2311222-2313098	Cytochrome b5 protein	Cytochrome b5 protein with possible nitrate reductase activity. Previously annotated as CYB5-1	Cytochrome b5-like Heme/Steroid binding domain	Cyt-b5 superfamily		AT5G48810.1	cytochrome B5 isoform D	YNL111C	CYtochrome B			104.695	75.4767	192.329	80.9523	120.11	89.4006	107.227	67.881	109.697	76.5345	1.38712	0.17713	2.37583	0.000458597	1.3435	0.304938	1.57963	1.4333
	Cre16.g663950		ERG3	chromosome_16:2920032-2922957	(M=1) 1.14.21.6 - Lathosterol oxidase.		Fatty acid hydroxylase superfamily	FA_hydroxylase superfamily; ERG3		AT3G02580.1	sterol 1	YLR056W	ERGosterol biosynthesis			40.3106	20.0955	155.303	37.0712	139.065	60.757	162.868	39.8167	72.7268	28.4559	2.00595	0.00307393	4.18932	0.000458597	2.28887	0.00317004	4.09044	2.55577
	Cre07.g346350			chromosome_7:4911872-4916815	(M=8) PTHR10174:SF78 - SEC14 CYTOSOLIC FACTOR FAMILY PROTEIN / PHOSPHOGLYCERIDE TRANSFER FAMILY PROTEIN		CRAL/TRIO domain	SEC14 superfamily								69.3532	31.2759	98.9146	25.5242	73.1744	35.7609	19.5273	14.0617	32.843	41.0074	2.21746	0.00307393	3.87533	0.000458597	2.04621	0.00317004	1.38869	0.800904
	Cre03.g195500		TGL9	chromosome_3:6537678-6541880	(M=2) PTHR12406:SF1 - IPLA2-RELATED		Patatin-like phospholipase	Pat_like; Patatin_and_cPLA2 superfamily								10.2653	7.78989	18.7275	9.18501	17.255	9.68398	8.01763	6.93331	9.74148	8.22137	1.31777	0.434786	2.03892	0.000458597	1.78181	0.0189368	1.15639	1.1849
	Cre12.g519450			chromosome_12:4271664-4274110	(M=1) KOG3221 - Glycolipid transfer protein		Glycolipid transfer protein (GLTP)	GLTP superfamily		AT2G33470.2	glycolipid transfer protein 1					31.9813	25.5548	46.1195	21.6768	34.8846	19.4019	10.1589	9.39341	12.9189	18.5896	1.25148	0.503864	2.1276	0.000458597	1.798	0.0129658	1.08149	0.694953
	Cre12.g557900		CDI1	chromosome_12:7268692-7270774	C-8,7 sterol isomerase	Probable 3-beta-hydroxysteroid-delta(8),delta(7)-isomerase (EC 5.3.3.5) (C-8,7 sterol isomerase) (Cholesterol delta-isomerase) (Delta8-delta7 sterol isomerase) (D8-D7 sterol isomerase) (EBP)	Emopamil binding protein	EBP superfamily		AT1G20050.1	C-8,7 sterol isomerase					72.7699	48.9702	114.186	49.12	110.221	61.8278	54.433	57.9279	71.0128	42.1614	1.486	0.0660841	2.32463	0.000458597	1.78271	0.00773763	0.939668	1.68431
	Cre17.g701700	FAB2		chromosome_17:781799-786028	Plastid acyl-ACP desaturase	Plastidic ACP-like delta-9 stearate desaturase. Previously annotated as FAB2	Fatty acid desaturase	Acyl_ACP_Desat; Ferritin_like superfamily		AT2G43710.2	Plant stearoyl-acyl-carrier-protein desaturase family protein					155.524	130.753	466.143	140.089	262.247	144.828	765.799	179.609	528.037	121.601	1.18945	0.683785	3.32748	0.000458597	1.81075	0.014392	4.2637	4.34237
	Cre02.g092350	CYP51G1	CYP6	chromosome_2:2518334-2523186	Cytochrome P450, CYP51 superfamily; sterol 14 desaturase	Cytochrome P450, CYP51 superfamily, CYP51G family. Similar to CYP51A (ABC59074), possible sterol 14-demethylase involved in sterol/ergosterol biosynthesis. CYP51G1 is the P450 nomenclature for sterol 14 alpha demethylases of green plants. ERG11 is a name	Cytochrome P450	p450 superfamily		AT1G11680.1	CYTOCHROME P450 51G1	YHR007C	ERGosterol biosynthesis			33.7128	27.8208	149.001	48.7466	78.508	44.3321	207.383	44.9409	73.3778	27.3077	1.21178	0.601144	3.05664	0.000458597	1.77091	0.024871	4.61457	2.68707
	Cre01.g000300		GDP8	chromosome_1:54135-57919	(M=1) PTHR10992:SF283 - PREDICTED PROTEIN (FRAGMENT)		alpha/beta hydrolase fold	Esterase_lipase superfamily;p PLN02894		AT4G24160.1	alpha/beta-Hydrolases superfamily protein	YLR099C	Increased Copper Tolerance			12.6218	11.2243	18.5698	7.4192	24.3495	10.523	29.1253	23.4529	10.238	18.0618	1.12451	0.831968	2.50294	0.000458597	2.31393	0.00317004	1.24186	0.566832
	Cre09.g405500	MLDP1	MLD1	chromosome_9:6143459-6146395				PyrG								17.4626	11.1644	30.4681	7.95939	33.7636	15.4669	9.19994	7.67219	2.93938	22.8371	1.56413	0.154679	3.82794	0.000458597	2.18296	0.00317004	1.19913	0.128711
	Cre17.g711150		FAD2	chromosome_17:1990389-1994722	(M=1) K10256 - omega-6 fatty acid desaturase (delta-12 desaturase)		Fatty acid desaturase; Domain of unknown function (DUF3474)	DUF3474 superfamily; DesA; Membrane-FADS-like superfamily		AT3G12120.2	fatty acid desaturase 2					20.2488	11.0823	53.321	23.3816	29.8646	23.3732	44.5524	21.3354	23.4793	17.4598	1.82713	0.00307393	2.28047	0.000458597	1.27773	0.418588	2.08819	1.34476
	Cre12.g512300			chromosome_12:1768950-1777470	(M=1) PTHR11771 - LIPOXYGENASE		Lipoxygenase	Lipoxygenase superfamily; PLAT superfamily		AT1G55020.1	lipoxygenase 1					11.4662	5.55653	0.853755	1.15118	7.99966	8.19462	26.1456	23.3351	1.90529	196.105	2.06355	0.00307393	0.741635	0.294388	0.976209	0.958475	1.12044	0.00971566
endomembrane
	Cre07.g332851			chromosome_7:2949134-2951242	(M=2) PF08806 - Sep15/SelM redox domain		Sep15/SelM redox domain	Sep15_SelM superfamily								15.9286	19.4576	22.2974	10.1248	17.5171	16.4767	26.1947	9.58615	29.2002	39.8772	0.818631	0.626349	2.20226	0.000458597	1.06314	0.878583	2.73256	0.732253
	Cre09.g389208			chromosome_9:3431661-3435268	(M=8) KOG1944 - Peroxisomal membrane protein MPV17 and related proteins		Mpv17 / PMP22 family	Mpv17_PMP22 superfamily		AT3G24570.1	Peroxisomal membrane 22 kDa (Mpv17/PMP22) family protein	YLR251W	Stress-inducible Yeast Mpv17			25.3638	21.569	52.8285	18.7395	37.8625	27.9151	20.3853	26.1105	11.5553	13.7566	1.17594	0.697114	2.8191	0.000458597	1.35634	0.288952	0.780732	0.839982
	Cre06.g262000		SNR5	chromosome_6:1750839-1754631	(M=6) PF09335 - SNARE associated Golgi protein		SNARE associated Golgi protein	COG0398; SNARE_assoc superfamily								21.8915	15.8351	41.4817	19.2214	26.7032	19.4603	18.8297	17.6657	14.9878	15.6464	1.38247	0.233959	2.1581	0.000458597	1.37219	0.256904	1.06589	0.957907
	Cre16.g675958			chromosome_16:3504752-3508718	(M=2) PTHR10766:SF14 - TRANSMEMBRANE 9 SUPERFAMILY PROTEIN MEMBER 1		Endomembrane protein 70	EMP70 superfamily	Golgi-localized vacuole Cu transport? See Hegelund, Josefine N., et al. "Transmembrane nine proteins in yeast and Arabidopsis affect cellular metal contents without changing vacuolar morphology." Physiologia plantarum 140.4 (2010): 355-367.							70.8061	52.8696	110.979	52.3139	82.1309	55.5674	36.0351	36.2143	39.4846	55.0917	1.33926	0.290976	2.12141	0.000458597	1.47804	0.137325	0.995052	0.716707
	Cre10.g458400		SRR16	chromosome_10:5433286-5434541	Scavenger receptor cysteine rich (SRCR) protein	Scavenger receptor cysteine-rich protein with multiple C-type lectin domains and a glycoside hydrolase family 18 domain. Very large protein. Part of a group of 4 homologous proteins.										14.8126	13.5895	21.8564	7.55795	17.8304	12.4633	10.6143	7.24232	10.3051	25.4609	1.09	0.907834	2.89184	0.000458597	1.43063	0.217243	1.46559	0.404742
	Cre07.g330950		AP4S4	chromosome_7:2688106-2691042	Sigma4-Adaptin	Expressed protein. Sigma4-Adaptin, clathrin adaptor complex small subunit, putative member of AP-4 complex	Clathrin adaptor complex small chain	APS2; Clat_adaptor_s superfamily		AT2G19790.1	SNARE-like superfamily protein					26.6812	18.5966	33.3431	14.922	26.1272	16.6655	16.515	17.5718	20.6674	27.1643	1.43474	0.170654	2.23449	0.000458597	1.56774	0.0901194	0.939858	0.760829
	Cre17.g735400		VPS2B	chromosome_17:5154409-5158988	Subunit of the ESCRT-III complex	Expressed Protein. Similar to yeast Vps2p/Did4p, SNF7-domain protein, component of the ESCRT-III complex involved in the ubiquitin-mediated internalization into the multi-vesicular bodies (late endosomes)	Snf7	Snf7 superfamily								30.0327	26.4466	48.0922	23.4662	40.7121	28.209	18.8634	13.3671	27.2339	35.9795	1.1356	0.813877	2.04942	0.000458597	1.44323	0.167384	1.41118	0.756928
	Cre03.g188500		VPS46	chromosome_3:5761415-5764207	Subunit of the ESCRT-III complex	Expressed Protein. Similar to yeast Did2p/Vps46p, SNF7-domain protein, component of the ESCRT-III complex involved in the ubiquitin-mediated internalization into the multi-vesicular bodies (late endosomes)	Snf7	Snf7 superfamily		AT1G17730.1	vacuolar protein sorting 46.1	YKR035W-A	Doa4-Independent Degradation			48.6179	32.8265	71.7214	31.9287	57.6831	38.4678	42.542	42.2218	39.2987	62.6745	1.48106	0.0786184	2.2463	0.000458597	1.49952	0.124833	1.00758	0.627029
	Cre12.g516100			chromosome_12:3919079-3920423	(M=1) PTHR12665 - ORMDL PROTEINS		ORMDL family	ORMDL superfamily	Evidence form suggests that ORMDLs are involved in protein folding in the ER. Orm proteins have been identified as negative regulators of sphingolipid synthesis that form a conserved complex with serine palmitoyltransferase, the first and rate-limiting enzyme in sphingolipid production. This novel and conserved protein complex, has been termed the SPOTS complex (serine palmitoyltransferase, Orm1/…	AT5G42000.1	ORMDL family protein	YLR350W				48.3293	35.6693	76.4741	34.1117	63.478	39.8299	31.9035	34.7012	26.5321	34.2627	1.35493	0.25252	2.24187	0.000458597	1.59373	0.064062	0.919377	0.774373
	Cre16.g689087			chromosome_16:7579125-7583937	(M=1) PTHR10994:SF41 - RETICULON-LIKE PROTEIN		Reticulon	Reticulon superfamily; HEV_ORF1 superfamily								72.2905	55.5488	121.818	59.9582	112.296	72.1223	29.8289	28.9653	26.838	59.1529	1.30139	0.37573	2.03172	0.000458597	1.55702	0.0923586	1.02981	0.453706
	Cre02.g098800			chromosome_2:4241996-4246308	(M=1) K09586 - endoplasmic reticulum protein 29		ERp29, N-terminal domain; Endoplasmic reticulum protein ERp29, C-terminal domain	Thioredoxin_like superfamily; ERp29c superfamily; Pyr_redox; SDR superfamily; Thioredoxin_reductase								61.8595	43.1436	95.9103	47.1555	63.9983	46.0209	42.3251	48.9799	46.9064	55.8429	1.4338	0.123254	2.03392	0.000458597	1.39064	0.225023	0.864132	0.839971
	Cre06.g272150			chromosome_6:2887411-2889607	(M=1) PTHR15337 - ANTERIOR GRADIENT PROTEIN-RELATED			Fer4_NifH; ABC_ATPase superfamily; Thioredoxin_like superfamily; RHH_1 superfamily								9.83464	7.88666	12.6293	6.40989	11.6222	10.0989	7.65218	5.62489	6.35125	10.633	1.247	0.703489	1.97028	0.000458597	1.15084	0.716939	1.36041	0.597315
	Cre06.g293100			chromosome_6:6497164-6499941	(M=2) PF09177 - Syntaxin 6, N-terminal		Syntaxin 6, N-terminal	Syntaxin-6_N superfamily; t_SNARE superfamily								10.6548	1.63276	29.9629	1.46283	20.1358	8.97905	10.8301	9.43832	4.19109	1.28107	6.52564	0.00307393	20.4828	0.000458597	2.24253	0.00317004	1.14746	3.27155
	Cre04.g224800		VAM4	chromosome_4:2954522-2957612	Endosomal R-SNARE protein, Vamp7/Nyv1-family (R.III)	Endosomal R-SNARE protein, Vamp7/Nyv1-family (R.III). Expressed Protein. Class R.III SNARE, involved in Golgi/PM and Golgi/endosomal trafficking (PMID: 17596510). Most similar to VAMP72-family of land plants, part of 4-member gene family in Chlamydomona	Synaptobrevin	Synaptobrevin superfamily; Longin superfamily				YOR327C	Suppressor of the Null allele of CAP			24.8074	11.1771	53.4717	17.1674	37.5869	17.0533	16.8564	20.5629	14.1363	7.16213	2.21948	0.00307393	3.11472	0.000458597	2.20408	0.00317004	0.819748	1.97376
	Cre01.g051400		ERD2A	chromosome_1:7109945-7112877	KDEL Receptor A	Expressed Protein. Conserved protein similar to KDEL receptor involved in ER retention of lumenal proteins.	ER lumen protein retaining receptor	ER_lumen_recept superfamily		AT3G25040.1	endoplasmic reticulum retention defective 2B	YBL040C	Endoplasmic reticulum Retention Defective			80.2957	50.3566	138.305	50.7951	94.7202	56.6193	28.6537	29.1155	35.3286	45.9575	1.59454	0.0156857	2.7228	0.000458597	1.67293	0.0387012	0.984139	0.768723
	Cre01.g004350		ALIX	chromosome_1:841528-850578	(M=1) K12200 - programmed cell death 6-interacting protein		BRO1-like domain	BRO1_Alix_like superfamily; V_Alix_like superfamily; Extensin_2 superfamily; ALIX_LYPXL_bnd; Pro-rich		AT1G15130.1	Endosomal targeting BRO1-like domain-containing protein	YOR275C	Regulator of IME2			16.6715	10.8386	22.1381	10.6951	18.9254	10.8906	16.4315	15.5484	13.364	14.1483	1.53816	0.0428519	2.06993	0.000458597	1.73777	0.0175038	1.0568	0.944566
	Cre02.g144050		ELG34	chromosome_2:7485260-7493527	Exostosin-like glycosyltransferase	Exostosin-like glycosyltransferases	Exostosin family	Exostosin superfamily; EGF_CA superfamily								13.5221	10.7689	31.0805	10.0568	19.0933	9.70109	5.21019	5.2316	4.85806	5.79868	1.25566	0.501015	3.0905	0.000458597	1.96816	0.00317004	0.995908	0.837787
	Cre13.g577950		VPS60	chromosome_13:2132775-2136527	Subunit of the ESCRT-III complex	Expressed Protein. Similar to VPS60, a SNF7-domain protein, component of the ESCRT-III complex involved in the ubiquitin-mediated internalization into the multi-vesicular bodies (late endosomes)	Snf7	Snf7 superfamily		AT3G10640.1	SNF7 family protein	YDR486C	Vacuolar Protein Sorting			29.0342	21.1667	44.9181	20.1651	40.7267	24.6102	25.4749	25.9237	22.6607	27.572	1.37169	0.245997	2.22752	0.000458597	1.65487	0.0422622	0.982688	0.821874
	Cre12.g483550		VPE1	chromosome_12:38025-43478	Vacuolar processing enzyme	A vacuole-targeted cysteine protease (clan CD of the C13 family) that has substrate specificity toward Asn and Asp residues (asparaginyl endopeptidase). Cr VPE is most closely related to vegetative-type plant VPEs (maize NP1); plant orthologues are involv	Peptidase C13 family	Peptidase_C13; CASc superfamily		AT1G62710.1	beta vacuolar processing enzyme					24.9171	21.0204	31.194	15.0103	23.7506	14.2044	18.5308	16.6504	12.2786	12.4233	1.18538	0.672297	2.07817	0.000458597	1.67206	0.034456	1.11293	0.988353
	Cre16.g683400			chromosome_16:5163131-5166915	(M=8) PTHR10174:SF78 - SEC14 CYTOSOLIC FACTOR FAMILY PROTEIN / PHOSPHOGLYCERIDE TRANSFER FAMILY PROTEIN		CRAL/TRIO domain	SEC14 superfamily								14.33	10.7915	18.4785	9.34795	18.9625	10.1472	10.4248	13.0977	7.50153	10.7265	1.3279	0.347718	1.97674	0.000458597	1.86874	0.00568854	0.795926	0.699346
carbon metabolism
	Cre03.g180250	INO1	IPS1	chromosome_3:4991066-4994033	(M=1) 5.5.1.4 - Inositol-3-phosphate synthase.		Myo-inositol-1-phosphate synthase	PLN02438; NAD_binding_5 superfamily		AT2G22240.1	myo-inositol-1-phosphate synthase 2	YJL153C	INOsitol requiring			178.568	148.368	327.51	141.524	263.984	170.33	148.357	165.854	128.961	175.897	1.20355	0.652718	2.31417	0.000458597	1.54984	0.106691	0.894504	0.733162
	Cre09.g388800		GDH1	chromosome_9:2819530-2824322	Glutamate dehydrogenase	Glutamate dehydrogenase (EC 1.4.1.2); predicted by Target-P and iPSORT to be mitochondrial	Glu/Leu/Phe/Val dehydrogenase, dimerisation domain; Glutamate/Leucine/Phenylalanine/Valine dehydrogenase	NAD_bind_1_Glu_DH; SDR superfamily; ELFV_dehydrog_N superfamily								29.3448	33.9872	30.6397	14.8546	24.83	17.7055	23.5811	18.6	18.1797	54.2763	0.863407	0.742648	2.06264	0.000458597	1.40239	0.211224	1.2678	0.334947
	Cre01.g053150	GPD3		chromosome_1:7388166-7394161	Glycerol-3-phosphate dehydrogenase/dihydroxyacetone-3-phosphate reductase	Glycerol-3-phosphate dehydrogenase/dihydroxyacetone-3-phosphate reductase	NAD-dependent glycerol-3-phosphate dehydrogenase C-terminus; haloacid dehalogenase-like hydrolase; NAD-dependent glycerol-3-phosphate dehydrogenase N-terminus	HAD_like superfamily; NAD_Gly3P_dh_C superfamily; NAD_Gly3P_dh_N; SDR superfamily; Glycerol-3-phosphate_dehydrogenase; Hydrolase								23.1433	15.5442	30.0031	12.1459	14.8393	11.0094	4.87367	2.52271	17.778	3.11566	1.48887	0.0694497	2.47022	0.000458597	1.34788	0.295668	1.93192	5.70601
	Cre12.g553250	PFK2		chromosome_12:7825524-7831836	Phosphofructokinase	Phosphofructokinase family protein (EC 2.7.1.11 or 2.7.1.90), probably plastid targeted	Phosphofructokinase	PFK superfamily								83.0724	71.4911	141.692	67.3824	105.799	67.6286	54.687	50.9067	56.2956	88.4408	1.162	0.739532	2.1028	0.000458597	1.56441	0.0912075	1.07426	0.636534
	Cre03.g144847		PYK4	chromosome_3:364241-380653	Pyruvate kinase	Pyruvate kinase (PK) [EC 2.7.1.40]; catalyses the final step in glycolysis, which is the conversion of phosphoenolpyruvate to pyruvate with concomitant phosphorylation of ADP to ATP. (This gene model is one of three possible variants from this genome regi	Pyruvate kinase, barrel domain; Pyruvate kinase, alpha/beta domain	Pyruvate_Kinase superfamily; PLN02461; Pyruvate_kinase								19.8975	18.7616	25.7896	12.5048	21.1219	14.2584	9.7585	10.3246	13.0449	17.7284	1.06054	0.930909	2.06238	0.000458597	1.48137	0.144267	0.94517	0.735819
	Cre13.g565800		EZY11	chromosome_13:619875-621992	UDP-Glucose:protein transglucosylase	Early zygote expressed protein [PMID: 18487630] activated upon fus mating that could be involved in initiation of starch granule formation (PMID:8521968); also known as amylogenin and reversibly glycosylated polypeptide; found in mitochondrial proteome (c	Reversibly glycosylated polypeptide	RGP superfamily		AT3G02230.1	reversibly glycosylated polypeptide 1					428.728	291.897	768.596	292.905	518.809	348.81	218.829	198.737	208.129	455.79	1.46876	0.142782	2.62405	0.000458597	1.48737	0.158576	1.1011	0.456634
	Cre17.g721500	STA2	GBBSI	chromosome_17:3129586-3134098	Granule-bound starch synthase I	Granule-bound starch synthase I, catalyses the transfer of the glucosyl moiety of the ADP-glucose to the non-reducing end of a pre-existing alpha 1,4 linked chain. (gi 8573760) (AAC17969); described by Wattebled et al. 2002 [PMID:12153578]. Low-CO2 induci	Glycosyl transferases group 1; Starch synthase catalytic domain	GT1_Glycogen_synthase_DULL1_like; Glycosyltransferase_GTB_type superfamily; Glycogen_synthase		AT1G32900.1	UDP-Glycosyltransferase superfamily protein					169.294	120.118	189.047	84.2171	194.087	148.176	205.688	285.704	198.657	338.932	1.4094	0.208503	2.24476	0.000458597	1.30984	0.394653	0.719934	0.586126
	Cre03.g144707			chromosome_3:329989-337085	(M=1) PTHR22573:SF4 - PHOSPHOGLUCOMUTASE		Phosphoglucomutase/phosphomannomutase, alpha/beta/alpha domain I; Phosphoglucomutase/phosphomannomutase, alpha/beta/alpha domain II; Phosphoglucomutase/phosphomannomutase, alpha/beta/alpha domain III	phosphohexomutase superfamily; {ManB}		AT1G70820.1	phosphoglucomutase, putative / glucose phosphomutase, putative					15.4249	13.3984	28.8995	13.6118	22.0608	15.4146	16.8315	16.65	15.5466	25.8423	1.15125	0.764635	2.12312	0.000458597	1.43116	0.177915	1.0109	0.601595
	Cre16.g683450		AGP2	chromosome_16:5156619-5162949	(M=3) 2.7.7.27 - Glucose-1-phosphate adenylyltransferase.		Nucleotidyl transferase	LbetaH superfamily; Glyco_tranf_GTA_type superfamily								7.50819	8.63844	11.5232	5.90007	8.36461	6.0052	3.83823	3.75204	5.55593	14.3016	0.86916	0.792925	1.95306	0.000458597	1.39289	0.25404	1.02297	0.388483
	Cre03.g149250		ICL2	chromosome_3:1142954-1147575	(M=2) PTHR21631:SF4 - CARBOXYPHOSPHONOENOLPYRUVATE MUTASE		Isocitrate lyase family	ICL_PEPM; TIM_phosphate_binding superfamily		AT2G43180.2	Phosphoenolpyruvate carboxylase family protein					46.5495	26.6589	94.1535	23.8679	86.72	51.2416	35.8591	43.2795	24.786	23.6325	1.74611	0.00307393	3.94478	0.000458597	1.69237	0.0290161	0.828547	1.04881
	Cre01.g053000	GPD2	GPD1	chromosome_1:7373685-7379583	Glycerol-3-phosphate dehydrogenase/dihydroxyacetone-3-phosphate reductase	Glycerol-3-phosphate dehydrogenase/dihydroxyacetone-3-phosphate reductase	NAD-dependent glycerol-3-phosphate dehydrogenase C-terminus; haloacid dehalogenase-like hydrolase; NAD-dependent glycerol-3-phosphate dehydrogenase N-terminus	HAD_like superfamily; NAD_Gly3P_dh_C; NAD_Gly3P_dh_C superfamily; NAD_Gly3P_dh_N; SDR superfamily; Glycerol-3-phosphate_dehydrogenase; Hydrolase								18.3818	5.07642	43.6563	6.7532	29.6825	10.796	59.7511	49.6547	11.9669	25.6687	3.62102	0.00307393	6.46454	0.000458597	2.7494	0.00317004	1.20333	0.466206
	Cre03.g207800		ADH5	chromosome_3:7211785-7215173	(M=2) PTHR11695:SF285 - L-THREONINE 3-DEHYDROGENASE		Alcohol dehydrogenase GroES-like domain; Zinc-binding dehydrogenase	CAD1; MDR superfamily		AT4G37990.1	elicitor-activated gene 3-2	YMR318C	Alcohol DeHydrogenase			30.6443	15.9158	41.0045	7.77353	66.3168	19.9809	17.8612	22.0702	16.082	14.1345	1.9254	0.00307393	5.27489	0.000458597	3.31901	0.00317004	0.80929	1.13778
	Cre12.g526800		GND1	chromosome_12:5098461-5102755	6-phosphogluconate dehydrogenase, decarboxylating	6-phosphogluconate dehydrogenase, decarboxylating (EC 1.1.1.44); GI:18644674; possibly cytosolic targeted splicing variant of GND1a based on EST evidence & similarity to GI:13936693	6-phosphogluconate dehydrogenase, C-terminal domain; NAD binding domain of 6-phosphogluconate dehydrogenase	6PGD superfamily; NAD_binding_2; SDR superfamily		AT1G64190.1	6-phosphogluconate dehydrogenase family protein	YGR256W				93.2399	80.5453	188.666	78.7858	132.358	78.8812	45.4165	44.2202	62.1405	80.3671	1.15761	0.744846	2.39467	0.000458597	1.67794	0.0422622	1.02705	0.773208
	Cre17.g746997		ADH1	chromosome_17:7068686-7076475	Dual function alcohol/acetaldehyde dehydrogenase	Dual function alcohol dehydrogenase / acetaldehyde dehydrogenase [EC:1.1.1.1 /1.2.1.10], probably mitochondrial [PMID: 14756315]. Consolidates 3 previous v3 models, probably correctly	Iron-containing alcohol dehydrogenase; Aldehyde dehydrogenase family	AAD_C; DHQ_Fe-ADH superfamily; ALDH_F20_ACDH; ALDH-SF superfamily				YGL256W	Alcohol DeHydrogenase			261.737	255.125	319.804	160.176	298.669	165.886	54.4378	46.8632	104.431	233.582	1.02592	0.978915	1.99658	0.000458597	1.80045	0.0258733	1.16163	0.447085
	Cre12.g485150	GAP1		chromosome_12:226537-229749	Glyceraldehyde 3-phosphate dehydrogenase	Glyceraldehyde 3-phosphate dehydrogenase (EC 1.2.1.12), possible cytosolic form; carboxy 90% of deduced AA sequence identical to cytosolic G3PC_CHLRE [Genbank P49644; PMID: 8114942], but the N-terminal AA's do not match those of G3PC_CHLRE. Two splice va	Glyceraldehyde 3-phosphate dehydrogenase, NAD binding domain; Glyceraldehyde 3-phosphate dehydrogenase, C-terminal domain	GapA		AT1G79530.1	glyceraldehyde-3-phosphate dehydrogenase of plastid 1	YGR192C	Triose-phosphate DeHydrogenase			558.098	495.109	912.315	337.895	596.667	300.398	133.596	104.67	179.116	405.967	1.12722	0.847883	2.7	0.000458597	1.98625	0.00949967	1.27635	0.441208
	Cre06.g278210		GPM1	chromosome_6:4052699-4058495	Phosphoglucomutase	Phosphoglucomutase, plastid form; glucose phosphomutase (EC 5.4.2.2). The Chlamydomonas sucrose biosynthesis pathway, including this gene, was used in an example of metabolic network analysis by Nikoloski et al. 2008 [PMID: 18682254]. Two splice variants	Phosphoglucomutase/phosphomannomutase, alpha/beta/alpha domain I; Phosphoglucomutase/phosphomannomutase, alpha/beta/alpha domain II; Phosphoglucomutase/phosphomannomutase, C-terminal domain; Phosphoglucomutase/phosphomannomutase, alpha/beta/alpha domain III	PGM1; phosphohexomutase superfamily		AT5G51820.1	phosphoglucomutase	YMR105C	PhosphoGlucoMutase			179.477	118.525	272.764	137.299	239.79	140.083	127.506	147.094	90.7317	139.479	1.51425	0.0722915	1.98664	0.000458597	1.71177	0.0387012	0.866833	0.650504
	Cre08.g384750		AMA3	chromosome_8:4859948-4865606	(M=2) 3.2.1.1 - Alpha-amylase.		Alpha-amylase C-terminal beta-sheet domain; Alpha amylase, catalytic domain	AmyAc_family superfamily								20.099	20.9583	13.8348	6.36349	21.854	12.5497	19.1945	15.7641	9.97892	37.4587	0.959	0.953744	2.17409	0.000458597	1.7414	0.0274424	1.21761	0.266398
	Cre17.g700650		GFY2	chromosome_17:664676-667718	(M=4) K07034 - mannosyl-3-phosphoglycerate phosphatase [EC:3.1.3.70]		GPR1/FUN34/yaaH family	Grp1_Fun34_YaaH superfamily	may be acetate transporter							51.2502	51.2097	82.0759	35.8662	52.806	31.941	11.9137	7.37883	28.6227	36.3594	1.00079	0.997545	2.28839	0.000458597	1.65324	0.0483851	1.61458	0.787216
	Cre04.g229700		UGP1	chromosome_4:3807637-3814436	UDP-glucose pyrophosphorylase	UTP:glucose-1-phosphate uridylyltransferase; plays a central role as a glucosyl donor in metabolic pathways; a cytosolic enzyme. The Chlamydomonas sucrose biosynthesis pathway, including this gene, was used in an example of metabolic network analysis by N	UTP--glucose-1-phosphate uridylyltransferase	Glyco_tranf_GTA_type superfamily; UGPase_euk		AT5G17310.2	UDP-glucose pyrophosphorylase 2	YKL035W	UDP-glucose pyrophosphorylase			47.15	30.9333	69.3647	33.6928	70.4853	44.2803	31.8391	23.9647	33.5826	59.4321	1.52425	0.037261	2.05874	0.000458597	1.5918	0.0705808	1.32858	0.565058
	Cre02.g119700			chromosome_2:6882986-6889393	(M=4) PF02449 - Beta-galactosidase		Beta-galactosidase	AmyAc_family superfamily								14.0321	9.02616	17.5518	7.02578	19.9939	15.7337	9.05569	8.55774	8.84661	42.9784	1.5546	0.039349	2.4982	0.000458597	1.27077	0.425492	1.05819	0.205839
nucleic acids
	Cre07.g346100			chromosome_7:4871466-4875095	(M=1) KOG4417 - Predicted endonuclease		Endonuclease V	Endonuclease_V superfamily		AT4G31150.2	endonuclease V family protein					5.93671	4.4149	12.0892	3.71939	8.29841	5.06972	4.33678	3.23102	3.42273	4.03238	1.3447	0.518095	3.25032	0.000458597	1.63686	0.087974	1.34223	0.848811
	Cre12.g495550			chromosome_12:763231-764014	(M=4) PF05186 - Dpy-30 motif		Dpy-30 motif									40.3458	32.0979	41.9053	21.4389	47.4005	32.3643	28.856	22.736	34.3417	69.0716	1.25696	0.550933	1.95464	0.000833666	1.46459	0.167242	1.26918	0.49719
	Cre04.g217903			chromosome_4:297940-303134	(M=5) PF01844 - HNH endonuclease		HNH endonuclease	HNHc superfamily		AT2G23840.1	HNH endonuclease					16.7793	14.2948	21.2295	7.53289	19.5497	12.9938	16.0284	13.0349	22.4812	26.2638	1.1738	0.728804	2.81824	0.000458597	1.50454	0.117132	1.22965	0.855977
	Cre10.g431400		TRZ1	chromosome_10:1858556-1861972	Nuclear RNase Z-like protein	Nuclear RNase Z-like protein. Sequence similarity with Arabidopsis TRZ1, a nuclear tRNase Z, beta-lactamase family		Lactamase_B superfamily		AT1G74700.1	tRNAse Z1					9.55768	7.16549	20.5584	6.53883	21.377	16.5269	4.91787	4.37102	6.42976	9.10882	1.33385	0.478745	3.14405	0.000458597	1.29347	0.390151	1.12511	0.705883
	Cre09.g401600			chromosome_9:864277-866101	(M=2) PF01918 - Alba		Alba	Alba superfamily		AT2G34160.1	Alba DNA/RNA-binding protein					41.2128	36.8612	48.446	22.3698	41.8981	26.2734	37.4292	33.7535	29.4561	46.0681	1.11805	0.84451	2.16569	0.000458597	1.5947	0.0771275	1.1089	0.639403
	Cre06.g286850			chromosome_6:5717604-5719973	(M=2) PF08719 - Domain of unknown function (DUF1768)		Domain of unknown function (DUF1768)	NADAR superfamily								8.33712	5.70804	12.0154	3.69641	11.9795	9.07156	4.66872	4.04828	7.81023	18.9803	1.46059	0.384263	3.25056	0.000458597	1.32056	0.406431	1.15326	0.411491
	Cre14.g609500			chromosome_14:267421-272847	(M=15) PF04720 - Protein of unknown function (DUF506)		Protein of unknown function (DUF506)	DUF506 superfamily	PD-(D/E)XK nuclease family PMID: 17584917							7.19031	4.77368	12.4709	3.87016	34.8442	24.0279	12.8222	5.56345	50.6717	13.315	1.50624	0.101102	3.22232	0.000458597	1.45016	0.167384	2.30472	3.80561
	Cre05.g239450			chromosome_5:3153761-3163123	(M=1) PTHR23339:SF29 - PREDICTED PROTEIN (FRAGMENT)		RNA ligase	Adenylation_DNA_ligase_like superfamily; AAA_17; ABC_ATPase superfamily; PTPc superfamily; AAA_33								12.8414	4.77326	22.9223	3.27219	24.1279	12.8819	13.473	15.762	7.6395	1.49534	2.69028	0.00307393	7.00519	0.000458597	1.87301	0.0175038	0.854777	5.10887
	Cre17.g725750			chromosome_17:3584760-3588632	(M=3) PTHR14202 - 60 KDA RIBONUCLEOPROTEIN SSA/RO		TROVE domain									24.7847	7.83883	56.196	4.56538	63.6541	32.4102	20.7649	28.7323	9.62821	2.13387	3.16179	0.00307393	12.3092	0.000458597	1.96401	0.00317004	0.722702	4.51209
	Cre17.g726850			chromosome_17:3681690-3685322	(M=3) PTHR14202 - 60 KDA RIBONUCLEOPROTEIN SSA/RO		TROVE domain	TROVE superfamily; vWFA superfamily								49.3766	32.282	90.3187	24.8704	88.1413	51.6583	29.2619	31.7634	29.4405	14.9	1.52954	0.045239	3.63157	0.000458597	1.70624	0.032896	0.921246	1.97587
	Cre03.g174450		CYCC1	chromosome_3:4268030-4271424				DUF506 superfamily	PD-(D/E)XK nuclease family PMID: 17584917							37.2295	9.308	63.5994	6.39896	90.6003	26.4689	27.8516	27.9456	8.93752	10.5661	3.99973	0.00307393	9.93902	0.000458597	3.4229	0.00317004	0.996636	0.845867
	Cre03.g193250			chromosome_3:6299390-6301499	(M=1) PTHR12684 - PUTATIVE PHOSPHOTRANSFERASE		RNA 2'-phosphotransferase, Tpt1 / KptA family	PTS_2-RNA superfamily		AT2G45330.2	RNA 2'-phosphotransferase, Tpt1 / KptA family	YOL102C				11.5929	6.69211	28.7261	10.5948	25.2752	15.2515	16.7366	18.2456	12.2324	5.14019	1.73232	0.036295	2.71134	0.000458597	1.65723	0.0487176	0.917295	2.37976
	Cre01.g053288			chromosome_1:7418241-7422877	(M=1) 6.5.1.4 - RNA-3'-phosphate cyclase.		RNA 3'-terminal phosphate cyclase (RTC), insert domain; RNA 3'-terminal phosphate cyclase	EPT_RTPC-like superfamily; RNA_3'-terminal_phosphate_cyclase								17.2941	9.94279	36.4193	5.68404	37.7083	17.5749	31.5829	28.9531	14.6742	8.24387	1.73936	0.00992138	6.40729	0.000458597	2.14558	0.00317004	1.09083	1.78001
	Cre17.g729950		SRX1	chromosome_17:4168828-4171545	(M=2) KOG3388 - Predicted transcription regulator/nuclease, contains ParB domain		ParB-like nuclease domain	ParBc superfamily; Spo0J		AT1G31170.2	sulfiredoxin	YKL086W	SulfiRedoXin			22.3387	15.2858	30.8797	12.7639	41.5435	18.9733	19.1497	22.8766	17.6925	18.6406	1.4614	0.14597	2.4193	0.000458597	2.18958	0.00317004	0.837087	0.949138
	Cre06.g280050		ROC86	chromosome_6:4997809-5007757	Single-stranded RNA 5'->3' exonuclease	Homologue of yeast Xrn1p and Rat1p, which are the cytoplasmic and the nuclear 5'->3' exoribonuclease. Tge nuclear Rat1p is involved in transcription termination by RNA polymerase II. Although several genes are found for 5'->3' exoribonuclease in other org	XRN 5'-3' exonuclease N-terminus	XRN_N superfamily				YGL173C	eXoRiboNuclease			16.8385	11.688	20.9901	10.3632	18.7092	11.0243	11.1836	10.1055	8.49663	7.49187	1.44067	0.0969723	2.02545	0.000458597	1.69709	0.036109	1.10668	1.13411
	Cre08.g381450	OPR35		chromosome_8:4317406-4326249												30.637	32.3926	23.04	11.6458	24.0463	14.6172	14.2847	9.66175	18.1254	41.2653	0.945802	0.934578	1.9784	0.000458597	1.64507	0.0483851	1.47848	0.439241
	Cre09.g409500			chromosome_9:6789718-6794324	(M=1) PTHR13516 - RIBONUCLEASE P 25KDA SUBUNIT-RELATED		Alba	Alba superfamily		AT3G07030.1	Alba DNA/RNA-binding protein					49.8799	46.7267	49.9232	23.0531	39.4117	23.2852	16.8657	12.5127	21.8524	20.8845	1.06748	0.919389	2.16557	0.000458597	1.69256	0.0290161	1.34789	1.04635
	Cre12.g524700		HAD4	chromosome_12:4828142-4831313	(M=1) PTHR12725:SF15 - PREDICTED PROTEIN (FRAGMENT)		haloacid dehalogenase-like hydrolase	HAD_like superfamily		AT5G59480.1	Haloacid dehalogenase-like hydrolase (HAD) superfamily protein	YGL224C	Suppressor of Disruption of TFIIS			26.0935	21.2533	38.2056	17.6694	35.8708	20.2156	13.8678	12.9115	11.536	12.8692	1.22774	0.560561	2.16225	0.000458597	1.77441	0.0129658	1.07407	0.896404
	Cre10.g447800			chromosome_10:3894649-3898145	(M=3) PTHR14202 - 60 KDA RIBONUCLEOPROTEIN SSA/RO		TROVE domain	TROVE superfamily								16.1028	4.3345	34.9103	1.80676	37.4485	24.4863	21.9883	25.587	11.2077	2.02141	3.71503	0.00307393	19.322	0.000458597	1.52937	0.113148	0.859354	5.5445
	Cre16.g693819			chromosome_16:360686-365362	(M=15) PF04720 - Protein of unknown function (DUF506)		Protein of unknown function (DUF506)	DUF506 superfamily	PD-(D/E)XK nuclease family PMID: 17584917	AT1G77145.1	Protein of unknown function (DUF506)					9.03566	4.28855	13.2452	6.74903	3.35725	3.61754	2.85557	1.81862	67.186	22.524	2.10693	0.00307393	1.96253	0.000458597	0.928048	0.859881	1.57019	2.98286
low CO2
	Cre09.g405750		CAH8	chromosome_9:6164294-6169922	Carbonic anhydrase	Beta-type carbonic anhydrase. Characterized by Ynalvez et al. 2008 [PMID: 18405332], who found it to be constituitively expressed. The inorganic carbon-concentrating mechanism has been reviewed by Spalding (2008) [PMID: 17597098].	Carbonic anhydrase	beta_CA superfamily		AT3G01500.3	carbonic anhydrase 1					70.821	51.9597	144.022	72.1807	105.102	70.7042	17.3618	18.4639	31.7986	6.07632	1.363	0.235622	1.9953	0.000458597	1.4865	0.136202	0.940311	5.2332
	Cre03.g179800	LCI24		chromosome_3:4919033-4920573	Low-CO2-inducible membrane protein	Low-CO2 inducible gene revealed by cDNA array analyses; SOSUI prediction: 3 transmembrane region. TargetP prediction: Mitochondria (confidence: 4); regulated by CCM1 [PMID: 15235119]. Acclimation to changing CO2 concentrations and light intensities was st	Protein of unknown function (DUF1517)									393.544	342.001	592.452	269.672	499.652	308.869	228.995	202.921	330.587	464.838	1.15071	0.776412	2.19694	0.000458597	1.61768	0.0687305	1.12849	0.711188
	Cre16.g664550		SHMT1	chromosome_16:2994584-2999677	Serine hydroxymethyltransferase	Serine hydroxymethyltransferase (gi:17066746, high light-inducible; Low-CO2 inducible gene revealed by cDNA array analyses; regulated by CCM1 [PMID: 15235119]. Acclimation to changing CO2 concentrations and light intensities was studied by Yamano et al.	Serine hydroxymethyltransferase	SHMT; AAT_I superfamily; Aminotran_1_2		AT4G37930.1	serine transhydroxymethyltransferase 1	YLR058C	Serine HydroxyMethyltransferase			188.608	140.451	272.119	138.585	263.872	164.882	150.037	126.882	164.058	103.074	1.34287	0.31825	1.96355	0.000458597	1.60037	0.0811025	1.18249	1.59165
	Cre16.g692800		AKR4	chromosome_16:517642-521704	(M=3) PTHR11732//PTHR11732:SF74 - ALDO/KETO REDUCTASE // SUBFAMILY NOT NAMED		Aldo/keto reductase family	Aldo_ket_red superfamily				YJR096W				17.4212	9.48188	21.181	8.26914	67.6124	8.44859	8.40421	7.20103	11.3412	14.6101	1.83731	0.00307393	2.56145	0.000458597	8.0028	0.00317004	1.16708	0.776258
	Cre11.g467693			chromosome_11:1201261-1206655	(M=5) PF07466 - Protein of unknown function (DUF1517)		Protein of unknown function (DUF1517)	DUF1517 superfamily								14.2521	8.82791	32.5349	7.62241	32.3021	17.659	10.0902	10.907	9.48267	4.96659	1.61444	0.0414981	4.26832	0.000458597	1.82921	0.0175038	0.925112	1.90929
	Cre11.g467692			chromosome_11:1196741-1201044	(M=5) PF07466 - Protein of unknown function (DUF1517)		Protein of unknown function (DUF1517)	DUF1517 superfamily								23.05	16.8568	36.6134	12.7462	35.1794	19.781	17.3891	16.5215	17.2855	15.0482	1.3674	0.230979	2.8725	0.000458597	1.77844	0.014392	1.05251	1.14868
	Cre13.g607350		CAH7	chromosome_13:5099406-5104625	Carbonic anhydrase	Beta-type carbonic anhydrase. Characterized by Ynalvez et al. 2008 [PMID: 18405332], who found it to be constituitively expressed. The inorganic carbon-concentrating mechanism has been reviewed by Spalding (2008) [PMID: 17597098].	Carbonic anhydrase	beta_CA superfamily				YNL036W	NonClassical Export			51.8781	50.6047	80.2214	30.3174	51.2932	31.0119	11.2337	7.08327	28.1128	36.0518	1.02516	0.973993	2.64605	0.000458597	1.65398	0.0399126	1.58595	0.779789
	Cre03.g191300	LCI35	LCI34	chromosome_3:6048075-6050818	Low-CO2-inducible protein	Low-CO2 inducible gene revealed by cDNA array analyses; TargetP prediction: Mitochondria (confidence: 4); regulated by CCM1. PMID:15235119.										13.4095	12.8983	18.4818	8.6965	11.2405	6.26547	2.95186	2.61888	7.63791	7.76745	1.03963	0.959377	2.1252	0.000458597	1.79404	0.0218061	1.12715	0.983323
	Cre03.g191250	LCI34		chromosome_3:6044305-6047450	Low-CO2-inducible protein	Low-CO2 inducible gene revealed by cDNA array analyses; TargetP prediction: Mitochondria (confidence: 4); regulated by CCM1. PMID:15235119										84.4315	77.2037	204.715	56.5812	79.9541	41.7128	118.923	32.2224	154.061	141.91	1.09362	0.87766	3.61807	0.000458597	1.91678	0.00317004	3.69069	1.08562
	Cre17.g698400	LCI31		chromosome_17:335633-338694	Low-CO2-inducible protein	Low-CO2 inducible gene revealed by cDNA array analyses; regulated by CCM1 [PMID: 15235119]. Acclimation to changing CO2 concentrations and light intensities was studied by Yamano et al. 2008 [PMID: 18322145], appears in their table as Lci29 rather than LC				AT3G51100.3						19.2554	12.5135	12.2395	6.10306	23.1715	18.8909	15.3844	18.7177	45.1237	83.4879	1.53877	0.046262	2.00547	0.000458597	1.2266	0.518419	0.821917	0.540482
	Cre03.g162800	LCI1		chromosome_3:2885263-2887871	Low-CO2-inducible membrane protein	Low-CO2-inducible gene encoding 21 kDa transmembrane protein; Burow et al. 1996 [PMID: 8756610]; SOSUI prediction: signal peptide in N-terminal end and 3 transmembrane helices. Regulated by CO2 through MYB-transcription factor LCR1 [PMID: 15155888] and CC										11.287	4.54741	0	0.0806	14.2864	13.429	13.037	18.1575	96.8419	203.794	2.48207	0.00307393	0	1	1.06385	0.894292	0.717995	0.475195
	Cre09.g394658		LCI28	chromosome_9:4283644-4287700	Low-CO2-induced aldose reductase	Contains Aldo/keto reductase family (pfam00248.12). This family includes a number of K+ ion channel beta chain regulatory domains - these are reported to have oxidoreductase activity. Low-CO2 inducible gene revealed by cDNA array analyses. Acclimation to	Aldo/keto reductase family	potassium_channel_beta_2_subunit; Aldo_ket_red superfamily		AT2G37770.2	NAD(P)-linked oxidoreductase superfamily protein	YHR104W	trifunctional aldehyde reductase/xylose reductase/glucose 1-dehydrogenase (NADP(+))			4.80857	3.98593	6.43464	5.70052	18.2493	5.06395	3.15554	3.84861	4.51029	10.3508	1.20639	0.790912	1.12878	0.614754	3.60377	0.00317004	0.819917	0.435743
transcription
	Cre07.g325650			chromosome_7:1692521-1694851	(M=3) PTHR23292 - LIPOPOLYSACCHARIDE-INDUCED TRANSCRIPTION FACTOR REGULATING TUMOR NECROSIS FACTOR ALPHA		LITAF-like zinc ribbon domain	zf-LITAF-like superfamily								6.382	5.25194	10.0884	3.4728	9.92299	7.06893	6.09937	6.05892	4.00833	9.46649	1.21517	0.757598	2.90498	0.000458597	1.40375	0.265968	1.00668	0.423423
	Cre07.g321550		BLZ5	chromosome_7:1255641-1260306	(M=15) PF00170 - bZIP transcription factor		bZIP transcription factor	bZIP superfamily								38.9043	25.4017	43.4882	24.5267	63.8443	25.2447	35.7077	35.003	33.2265	39.8556	1.53156	0.0403056	1.7731	0.000458597	2.52902	0.00317004	1.02013	0.833672
	Cre01.g048150	HLA8		chromosome_1:6703885-6706385	Transcriptional co-activator/nuclease induced by high light	Putative transcriptional co-activator. High light-induced nuclease, staphylococcal nuclease homolog. Thermonuclease family. Induced under high light condition [PMID: 12000678]. A part of post-transcriptional gene silencing machinery [PMID: 11782532]. Si	Staphylococcal nuclease homologue	SNc superfamily; COG1525		AT2G40410.2	Staphylococcal nuclease homologue	YGL085W	Long Chronological Lifespan 3			176.465	121.713	471.285	150.33	225.334	97.5519	47.674	47.4929	57.282	26.8512	1.44985	0.128548	3.135	0.000458597	2.30989	0.00317004	1.00381	2.13331
	Cre12.g517350	LSD1		chromosome_12:4042515-4044894	Zinc-finger protein Lsd1	Zinc-finger protein Lsd1. Lsd1 monitors a superoxide-dependent signal and negatively regulates a plant cell death pathway in response to signals emanating from cells undergoing pathogen-induced hypersensitive cell death [PMID: 9054508]	LSD1 zinc finger	zf-LSD1 superfamily		AT4G20380.7	LSD1 zinc finger family protein					32.445	25.6433	46.7437	19.2359	42.774	26.2921	24.099	22.1273	27.9297	32.2299	1.26524	0.466207	2.43002	0.000458597	1.62688	0.0468379	1.08911	0.866577
	Cre10.g435450	CPL2		chromosome_10:2404916-2409272	Transcription factor-like protein	Conserved, expressed, transcription factor like protein	GATA zinc finger	ZnF_GATA superfamily		AT3G54810.1	Plant-specific GATA-type zinc finger transcription factor family protein					22.7334	21.2126	22.6415	13.3396	26.9043	13.0131	10.3381	9.5733	17.2602	17.5108	1.07169	0.913076	1.69731	0.00180338	2.06748	0.00317004	1.07989	0.985689
	Cre13.g590350		BLZ11	chromosome_13:3885272-3888238	(M=15) PF00170 - bZIP transcription factor		bZIP transcription factor	bZIP superfamily								38.4471	32.0208	57.1254	31.5543	70.6166	34.1275	36.2887	35.076	24.1298	26.4118	1.20069	0.626923	1.81038	0.000458597	2.0692	0.00317004	1.03457	0.913599
signalling
	Cre12.g557252			chromosome_12:7345257-7350409	(M=1) PTHR12771:SF3 - CELL MOTILITY PROTEIN RELATED		ELMO/CED-12 family	ELMO_CED12 superfamily		AT2G44770.1	ELMO/CED-12 family protein					8.77102	5.67486	12.2546	6.09479	10.3062	6.44961	12.23	9.48633	12.8093	8.77229	1.54559	0.091009	2.01067	0.000458597	1.59796	0.0726788	1.28922	1.4602
	Cre12.g512400			chromosome_12:1757518-1764516	(M=1) PTHR10919:SF248 - PREDICTED PROTEIN (FRAGMENT)		Sigma-54 interaction domain	ABC_ATPase superfamily; Fer4_5 superfamily; NapH; PspF	similarity to FesM from Synechococcus sp. PCC 7002; domains: transcriptional regulator-like containing Sigma-54 interaction domain and two 4Fe-4S binding domains found in polyferredoxin							12.0563	13.476	60.088	15.8759	18.7466	12.0723	51.7404	13.1751	48.5666	13.8534	0.89465	0.835892	3.78486	0.000458597	1.55286	0.0853643	3.92714	3.50575
	Cre12.g517400		RAB5	chromosome_12:4046259-4048315	Small Rab-related GTPase	Expressed Protein. Similar to the RabF/Rab5 type of small GTPase, involved in vesicle trafficking in the endosomal system; Found in the flagellar proteome [PMID: 15998802]. Previously annotated as RABF1	Ras family	Rab5_related; ABC_ATPase superfamily; Ras		AT4G19640.1	Ras-related small GTP-binding family protein	YOR089C	Vacuolar Protein Sorting			132.618	109.769	176.828	90.5701	149.046	108.307	102.574	98.6952	219.133	205.706	1.20816	0.608435	1.95239	0.000458597	1.37614	0.255177	1.0393	1.06527
	Cre09.g387450	OPR37		chromosome_9:3007446-3011785	(M=2) PF06743 - FAST kinase-like protein, subdomain 1		FAST kinase-like protein, subdomain 1	FAST_1 superfamily								12.9089	15.7276	11.8765	5.27857	11.6409	7.39578	7.23975	5.1047	7.42053	33.4708	0.82078	0.583508	2.24995	0.000458597	1.57399	0.0781844	1.41825	0.221702
	Cre02.g084100			chromosome_2:1491020-1493491	(M=22) PTHR23125 - F-BOX/LEUCINE RICH REPEAT PROTEIN			AMN1 superfamily	Antagonist of mitotic exit network protein 1; Amn1 has been functionally characterized in Saccharomyces cerevisiae as a component of the Antagonist of MEN pathway (AMEN). The AMEN network is activated by MEN (mitotic exit network) via an active Cdc14, and in turn switches off MEN. Amn1 constitutes one of the alternative mechanisms by which MEN may be disrupted. Specifically, Amn1 binds Tem1 (Term…	AT1G80630.1	RNI-like superfamily protein					38.4219	36.5133	72.3245	25.52	55.7239	38.4284	29.5444	28.6168	29.3493	35.1466	1.05227	0.943326	2.83403	0.000458597	1.45007	0.168538	1.03241	0.835054
	Cre17.g737050			chromosome_17:5445578-5450409	(M=2) PTHR22957//PTHR22957:SF159 - TBC1 DOMAIN FAMILY MEMBER GTPASE-ACTIVATING PROTEIN		Rab-GTPase-TBC domain	RabGAP-TBC superfamily								40.2517	25.4251	83.3374	32.8759	70.7571	35.7461	23.7279	23.6392	20.2706	20.6328	1.58315	0.0207291	2.53491	0.000458597	1.97944	0.00317004	1.00375	0.982445
	Cre17.g716400			chromosome_17:2523803-2528165	(M=1) PTHR13182 - ZINC FINGER PROTEIN 622			zf-C2H2_2 superfamily		AT4G31420.2	Zinc finger protein 622					45.2599	33.2415	68.8743	33.9001	68.2249	33.7319	45.57	49.2929	28.5394	25.6992	1.36155	0.22068	2.03168	0.000458597	2.02256	0.00317004	0.924474	1.11052
	Cre01.g018600			chromosome_1:3018855-3021856	(M=2) PTHR14955 - RETINOIC ACID INDUCED 1/TRANSCRIPTION FACTOR 20		B-cell receptor-associated protein 31-like	Bap31 superfamily		AT5G17190.1						37.2727	21.3036	52.6827	22.2811	36.2679	25.8224	22.2085	21.5857	24.4194	28.9368	1.7496	0.00561953	2.36446	0.000458597	1.40451	0.223046	1.02885	0.843887
	Cre16.g676700			chromosome_16:5977690-5982647	(M=1) PF00620 - RhoGAP domain		RhoGAP domain	RhoGAP superfamily		AT5G61530.1	small G protein family protein / RhoGAP family protein	YER155C	Bud EMergence			18.9993	12.0641	15.6073	7.951	13.3922	12.3965	7.30981	6.82174	12.5091	28.1102	1.57486	0.0303427	1.96294	0.000458597	1.08032	0.840982	1.07155	0.445002
	Cre01.g012500		PRA1	chromosome_1:2289191-2291906	Prenylated rab acceptor family protein	Expressed Protein. Similar to Prenylated Rab Acceptor Protein	PRA1 family protein	PRA1 superfamily		AT5G01640.1	prenylated RAB acceptor 1.B5	YNL044W				65.1124	42.6086	100.721	44.3607	81.2138	51.7578	45.2231	50.6973	35.5905	43.4021	1.52815	0.039349	2.2705	0.000458597	1.56911	0.0844903	0.892022	0.820018
cell division
	Cre02.g107850		MOB1	chromosome_2:5464867-5468959	Cytokinesis-related protein	MOB1 proteins are involved in mitotic exit and regulation of cytokinesis.	Mob1/phocein family	Mob1_phocein superfamily		AT4G19045.1	Mob1/phocein family protein	YIL106W	Mps One Binder			24.5679	21.0493	38.2821	18.9319	29.2761	21.124	23.1562	21.2068	16.6725	23.8198	1.16716	0.716253	2.02209	0.000458597	1.38592	0.230537	1.09192	0.699943
	Cre12.g553000			chromosome_12:7849544-7851906				Chromosome_partition_protein_Smc								36.4542	32.7614	47.1553	22.9017	44.3057	28.7968	13.2506	12.0548	28.6306	33.8858	1.11272	0.847833	2.05903	0.000458597	1.53856	0.0777534	1.0992	0.844914
chloroplast/Greencut
	Cre11.g467753		HMO2	chromosome_11:1540164-1542990	Heme oxygenase	Heme oxygenase; HMOX; HO; Catalyzes the degradation of heme to bilirubin, it is essential for recycling of iron from heme. Heme is used as a substrate and cofactor for its own degradation to biliverdin, iron, and carbon monoxide; Involved in the synthesis	Heme oxygenase	HemeO superfamily				YLR205C	HeMe oXygenase			6.71311	6.99477	12.615	5.28943	8.11315	5.08925	4.20141	2.00949	9.1907	11.4123	0.959733	0.973171	2.38495	0.000458597	1.59417	0.165103	2.09078	0.805333
	Cre03.g199800	HYDA1		chromosome_3:8216107-8220752	Iron hydrogenase	Chloroplast Fe-hydrogenase (= HYDA1); corresponds to GI:18026272	Iron hydrogenase small subunit; Iron only hydrogenase large subunit, C-terminal domain	Fe_hyd_lg_C superfamily; Fe_hyd_SSU superfamily								153.844	188.715	466.065	184.505	377.094	234.883	188.732	45.7746	582.628	144.244	0.815219	0.603311	2.52603	0.000458597	1.60545	0.0767677	4.12307	4.03918
	Cre01.g031100	TEF30		chromosome_1:4559894-4563800	Predicted protein	Contains a PDZ domain; present in thylakoid-enriched fraction based on mass spectrometric peptide identification [PMID: 17078018]; similar to Glycine max. SHOOT1 protein (AAK37555); conserved in Viridiplantae	PDZ domain (Also known as DHR or GLGF)	PDZ superfamily		AT1G55480.1	protein containing PDZ domain, a K-box domain, and a TPR region					189.677	172.175	228.512	116.496	198.676	153.462	215.773	198.624	272.051	440.093	1.10165	0.866517	1.96154	0.000458597	1.29463	0.404987	1.08634	0.618167
	Cre12.g519300	TEF9		chromosome_12:4258010-4259987	Predicted protein	Conserved expressed protein, possible chloroplast localization; Present in thylakoid-enriched fraction based on mass spectrometric peptide identification [PMID: 17078018]		DUF4079 superfamily		AT3G61870.1						74.6523	55.2092	121.032	60.0217	107.308	71.6325	69.3454	78.1448	69.7095	64.2499	1.35217	0.250243	2.01647	0.000458597	1.49804	0.12617	0.887396	1.08497
	Cre10.g450850			chromosome_10:4298393-4307439	(M=28) PF00168 - C2 domain		C2 domain	C2 superfamily	lipid binding domain							7.13137	6.1489	9.89717	4.97691	11.0818	8.4346	10.4845	9.97964	6.96494	7.01786	1.15978	0.786381	1.98862	0.000458597	1.31385	0.358166	1.05059	0.992459
	Cre06.g269300	CGL120		chromosome_6:2550824-2555260	(M=1) PF07103 - Protein of unknown function (DUF1365)		Protein of unknown function (DUF1365)	DUF1365 superfamily		AT1G30130.2						4.78491	4.24692	11.0314	5.26915	5.59595	3.98218	23.2354	8.11201	13.9362	4.20758	1.12668	0.870405	2.09358	0.000458597	1.40525	0.282312	2.86432	3.31217
	Cre02.g110350			chromosome_2:5741347-5744449	(M=15) PTHR10774 - EXTENDED SYNAPTOTAGMIN-RELATED		C2 domain	C2 superfamily	lipid binding domain	AT4G34150.1	Calcium-dependent lipid-binding (CaLB domain) family protein					75.577	53.9647	97.3337	40.6516	80.0222	52.3662	40.8531	42.5795	39.911	96.9574	1.40049	0.159569	2.39434	0.000458597	1.52813	0.106544	0.959455	0.411634
	Cre06.g305750			chromosome_6:8228877-8232683	(M=1) PTHR16122:SF14 - PREDICTED PROTEIN (FRAGMENT)		C2 domain	C2 superfamily	lipid binding domain							14.5624	12.5391	19.977	7.90821	15.6224	9.71961	7.52917	5.45696	7.28356	7.37923	1.16136	0.749534	2.52611	0.000458597	1.60731	0.06168	1.37974	0.987035
	Cre13.g569250	CGLD9		chromosome_13:1100775-1103630	Predicted protein	Conserved expressed protein; presence of a homolog in Guillardia theta and Anabaena suggests plastid localization	Protein of unknown function (DUF3054)	DUF3054 superfamily		AT1G44920.1						32.2463	32.1208	67.5613	30.7055	40.4222	32.5868	57.2795	18.625	38.4777	26.5234	1.00391	0.996314	2.2003	0.000458597	1.24045	0.476931	3.07541	1.45071
	Cre09.g390467		CGL66	chromosome_9:3647777-3652222	Predicted protein	Conserved expressed protein	Plasma-membrane choline transporter	Choline_transpo superfamily		AT4G38640.1	Plasma-membrane choline transporter family protein					18.6358	18.1575	23.833	11.6746	24.8279	18.9488	20.7501	17.9376	16.2515	25.6939	1.02634	0.973993	2.04144	0.000458597	1.31026	0.352967	1.15679	0.632504
	Cre05.g233950	CGL129		chromosome_5:214562-216048				CAAD superfamily	CAAD domains of cyanobacterial aminoacyl-tRNA synthetase. This domain is present in aminoacyl-tRNA synthetases (aaRSs), enzymes that couple tRNAs to their cognate amino acids. aaRSs from cyanobacteria containing the CAAD (for cyanobacterial aminoacyl-tRNA synthetases appended domain) protein domains are localized in the thylakoid membrane. The domain bears two putative transmembrane helices and i…	AT4G01150.1						686.956	552.325	970.707	490.36	922.633	608.06	542.123	566.963	764.522	1327.97	1.24375	0.583467	1.97958	0.000458597	1.51734	0.15308	0.956188	0.575707
	Cre01.g028150	CPLD69		chromosome_1:4219782-4220735				Complex1_LYR_1 superfamily	This is a family of proteins carrying the LYR motif of family Complex1_LYR, pfam05347, likely to be involved in Fe-S cluster biogenesis in mitochondria.	AT1G76060.1	LYR family of Fe/S cluster biogenesis protein					15.0916	12.3454	17.3013	8.40903	16.5145	10.0694	7.92455	8.61334	6.78045	11.2172	1.22245	0.71255	2.05747	0.000458597	1.64007	0.0893532	0.920032	0.604469
	Cre11.g468050			chromosome_11:1866543-1871276	(M=2) PF04012 - PspA/IM30 family		PspA/IM30 family	PspA								34.1281	7.33371	95.6871	4.74115	113.454	41.8013	20.4583	24.7095	7.2638	4.01536	4.65359	0.00307393	20.1823	0.000458597	2.71413	0.00317004	0.827953	1.809
	Cre05.g242400	PGR5		chromosome_5:1764548-1766071						AT2G05620.1	proton gradient regulation 5					160.677	79.339	238.715	71.8819	223.565	118.599	118.91	144.846	151.19	118.144	2.0252	0.00307393	3.32093	0.000458597	1.88505	0.00317004	0.820941	1.27971
	Cre11.g467594			chromosome_11:473141-474946	(M=5) KOG1030 - Predicted Ca2+-dependent phospholipid-binding protein		C2 domain	C2 superfamily	lipid binding domain							38.2241	9.75274	14.5102	4.14149	23.073	12.3381	4.89588	2.06947	3.21745	9.46674	3.91932	0.00307393	3.50362	0.000458597	1.87006	0.00317004	2.36577	0.339869
	Cre11.g467593			chromosome_11:470915-472941	(M=5) KOG1030 - Predicted Ca2+-dependent phospholipid-binding protein		C2 domain	C2 superfamily	lipid binding domain							30.0601	7.10524	10.31	3.77337	18.7207	9.57793	6.38755	4.1254	5.21666	5.19854	4.23069	0.00307393	2.73231	0.000458597	1.95457	0.00317004	1.54835	1.00349
	Cre11.g467599			chromosome_11:518777-520575	(M=5) KOG1030 - Predicted Ca2+-dependent phospholipid-binding protein		C2 domain	C2 superfamily	lipid binding domain							30.4111	9.18299	11.0046	2.80081	17.8628	6.97463	5.6243	2.58217	4.47281	8.96026	3.31168	0.00307393	3.92908	0.000458597	2.56111	0.00317004	2.17813	0.499183
	Cre07.g338350	CPLD50		chromosome_7:3782777-3788638	Predicted protein	Conserved protein				AT5G03900.2	Iron-sulphur cluster biosynthesis family protein					26.2733	16.914	36.8332	16.8032	43.8487	19.3917	21.2722	18.424	11.1222	10.9321	1.55335	0.0289894	2.19203	0.000458597	2.26121	0.00317004	1.15459	1.01739
	Cre11.g467601			chromosome_11:520725-522587	(M=5) KOG1030 - Predicted Ca2+-dependent phospholipid-binding protein		C2 domain	C2 superfamily								10.5852	3.90276	4.65598	2.07745	10.1268	4.85565	3.86598	2.70815	2.31196	5.1461	2.71223	0.00307393	2.2412	0.00150228	2.08557	0.00317004	1.42754	0.449264
	Cre13.g583550	VIPP1	VIP1	chromosome_13:2899023-2902833	Vesicle inducing protein in plastids 1	Presumably involved in vesicle formation/transport in the chloroplast, since VIPP1-underexpressing Arabidopsis mutants were abolished in vesicle budding from the inner membrane and had distorted thylakoids; VIPP1 in Chlamy is located to stroma, thylakoids	PspA/IM30 family	PRK10698 superfamily; PspA		AT1G65260.1	plastid transcriptionally active 4					169.266	112.769	334.352	127.4	266.507	151.27	94.3635	102.922	97.2533	78.9868	1.501	0.0786184	2.62443	0.000458597	1.7618	0.0338158	0.916845	1.23126
	Cre05.g237450	PSRP1		chromosome_5:2817336-2820699	Plastid-specific ribosomal protein 1	Plastid-specific ribosomal protein 1, imported to chloroplast; Chloroplast small ribosomal subunit protein Plastid-Specific Ribosomal Protein 1. This is a different protein from plastid ribosomal protein S1, product of the PRPS1 gene. Previously annotate	Sigma 54 modulation protein / S30EA ribosomal protein	RaiA superfamily		AT5G24490.1	30S ribosomal protein, putative					401.128	402.032	718.113	468.729	645.294	323.564	64.479	44.2878	165.167	82.0003	0.997751	0.997545	1.53204	0.00404334	1.99433	0.00317004	1.45591	2.01422
	Cre16.g651050	CYC6		chromosome_16:1238557-1240109	Cytochrome c6	Cytochrome c6, chloroplast precursor (Cyt c553) (Cyt c552) (PETJ) [PMID: 3036842; PMID: 1714451]	Cytochrome c	Cytochrom_C superfamily; CccA								0	0	250.393	0.154601	6.56624	0.467942	1920.23	0	1279.65	0	n.d.	1	1619.61	0.0671285	14.0322	0.00773763	n.d.	n.d.
	Cre12.g550702		TEF13	chromosome_12:9616317-9619088	Predicted protein	Protein with unknown function, chloroplast location proposed; present in thylakoid-enriched fraction based on mass spectrometric peptide identification [PMID: 17078018]		CAAD superfamily								131.491	137.43	158.906	51.5006	133.245	76.5313	59.3207	61.7677	43.8162	287.218	0.956785	0.948867	3.08552	0.000458597	1.74105	0.032896	0.960384	0.152554
	Cre01.g015500	CGL91		chromosome_1:2647604-2649759	(M=2) PTHR16122 - MCTP-RELATED		C2 domain	C2 superfamily	lipid binding domain			YOR086C	Three Calcium and lipid Binding domains (TriCalBins)			43.3155	31.2168	90.3486	30.1635	57.6007	26.5613	26.7707	19.7711	22.8508	20.7496	1.38757	0.192295	2.9953	0.000458597	2.16859	0.00317004	1.35403	1.10126
	Cre16.g675100	CPLD53		chromosome_16:6218171-6224525	(M=8) PF06203 - CCT motif		CCT motif	CCT superfamily	putative nuclear localisation signal							4.77384	4.76103	17.994	8.82159	5.4239	3.13295	26.2182	7.04478	14.1225	4.81623	1.00269	0.997435	2.03977	0.000458597	1.73124	0.02671	3.72165	2.93227
	Cre06.g294000	CGL113		chromosome_6:6641048-6644278	(M=2) 3.1.1.45 - Carboxymethylenebutenolidase.		Dienelactone hydrolase family	COG0412		AT2G32520.1	alpha/beta-Hydrolases superfamily protein					15.4326	9.41286	15.0905	5.14744	16.5851	9.43756	11.9531	15.0417	16.2993	19.4729	1.63952	0.071687	2.93165	0.000458597	1.75735	0.032896	0.794664	0.837025
	Cre07.g318950			chromosome_7:907929-915697	(M=28) PF00168 - C2 domain		C2 domain	C2 superfamily	lipid binding domain							11.689	7.70489	14.7515	7.0236	14.5922	7.51466	6.92505	6.53088	5.96741	4.89594	1.51709	0.0580298	2.10028	0.000458597	1.94183	0.00317004	1.06035	1.21885
	Cre03.g198950	CGL30		chromosome_3:8330413-8334041	Predicted protein	Conserved expressed protein	PsbP	PLN00066; PsbP superfamily		AT1G77090.1	Mog1/PsbP/DUF1795-like photosystem II reaction center PsbP family protein					147.395	112.743	207.662	98.864	170.202	92.8993	54.8646	55.7324	76.1161	99.3523	1.30735	0.352516	2.10048	0.000458597	1.83211	0.00773763	0.984429	0.766123
	Cre13.g578750		TBA1	chromosome_13:2254298-2259840	PsbA translation factor	Translation factor for chloroplast-encoded psbA gene; mutant has defect in translation of D1, PSII reaction center protein; chloroplast targeted; related to dehydrogenases	Dihydroorotate dehydrogenase	DHPD_FMN; TIM_phosphate_binding superfamily; PLN02495		AT3G17810.1	pyrimidine 1					49.7642	44.1128	58.9801	27.7272	53.7436	24.0531	36.04	25.7246	24.1736	34.7539	1.12811	0.808897	2.12716	0.000458597	2.23437	0.00317004	1.40099	0.695565
	Cre14.g626750			chromosome_14:2720048-2723518	(M=10) PTHR14154 - UPF0041 BRAIN PROTEIN 44-RELATED		Chlorophyll A-B binding protein	Chloroa_b-bind superfamily								60.9879	38.9203	108.014	44.5003	82.7508	56.311	56.4009	91.2619	46.2627	67.0534	1.56699	0.0253412	2.42726	0.000458597	1.46953	0.156205	0.618011	0.689938
	Cre12.g490500	CGL78		chromosome_12:1110734-1112794	Predicted protein	Conserved expressed protein of unknown function	Protein of unknown function (DUF2488)	Ycf54 superfamily		AT5G58250.1						102.985	66.5918	535.061	112.884	473.503	291.437	925.97	126.319	541.872	69.7177	1.54651	0.0495065	4.73992	0.000458597	1.62472	0.0793786	7.33041	7.77237
tetrapyrrole
	Cre16.g675000	HEMD1	HEMD	chromosome_16:6229619-6232875	Uroporphyrinogen-III synthase	Uroporphyrinogen-III synthase. Previously annotated as HEMD	Uroporphyrinogen-III synthase HemD	HemD superfamily								7.50923	5.41777	13.5672	6.03345	7.44304	5.74628	13.631	7.17515	14.1207	6.0381	1.38604	0.43939	2.24866	0.000458597	1.29528	0.457452	1.89975	2.3386
	Cre07.g346050	CRD1	CHL27A	chromosome_7:4866865-4871395	Copper response defect 1 protein	Copper response defect 1 protein, chloroplast precursor; Produced under copper and/or oxygen deficient conditions [GI:7542488; PMID: 11910013; PMID: 10811605; PMID: 11910013; PMID: 14673103]; also named CHL27A; Mg-protoporphyrin IX monomethyl ester (oxida	Rubrerythrin	ACSF; Ferritin_like superfamily								64.0523	47.6587	583.555	141.782	286.092	153.932	1480.96	120.831	827.143	63.3417	1.34398	0.290065	4.11586	0.000458597	1.85856	0.0129658	12.2565	13.0584
	Cre02.g085450		CPX1	chromosome_2:1646978-1650920	Coproporphyrinogen III oxidase	Coproporphyrinogen III oxidase, chloroplast precursor; GI:837299; CPO1; HEM13; HEM6 [PMID: 15849308]; Predicted chloroplast transit peptide 1-31	Coproporphyrinogen III oxidase	PLN02873; Coprogen_oxidas superfamily		AT1G03475.1	Coproporphyrinogen III oxidase	YDR044W	HEMe biosynthesis			114.242	84.5073	487.537	106.586	323.321	178.07	2408.92	142.729	776.067	129.348	1.35186	0.292374	4.57412	0.000458597	1.8157	0.024871	16.8776	5.99984
	Cre09.g396401		UPM1	chromosome_9:4586969-4590701	S-adenosyl-L-methionine-dependent uroporphyrinogen III methyltransferase	Siroheme synthase [Includes: Uroporphyrin-III C-methyltransferase (Urogen III methylase) (SUMT) Uroporphyrinogen III methylase) (UROM); Precorrin-2 dehydrogenase; Sirohydrochlorin ferrochelatase]; formerly SUMT1--renamed UPM1 by the advice of Sam Beale.	Tetrapyrrole (Corrin/Porphyrin) Methylases	SUMT; TP_methylase superfamily		AT5G40850.1	urophorphyrin methylase 1	YKR069W	METhionine requiring			12.0933	8.71291	19.7	5.8348	25.5204	13.8302	24.502	24.7298	9.94014	10.4295	1.38797	0.256476	3.37629	0.000458597	1.84527	0.00949967	0.990788	0.953079
	Cre09.g409100	UROS1	UPS1	chromosome_9:6742184-6746552	Uroporphyrinogen-III synthase	Uroporphyrinogen-III synthase, putative chloroplast precursor [PMID: 15849308]; UROS; hemD; hem4; predicted transit peptide 1-39; converts the linear tetrapyrrole hydroxymethyl bilane to the cyclic tetrapyrrole uroporphyrinogen III. Previously annotated	Uroporphyrinogen-III synthase HemD	HemD superfamily		AT2G26540.1	uroporphyrinogen-III synthase family protein					169.813	107.555	240.516	110.437	177.86	109.412	67.9209	74.5176	64.8782	54.5318	1.57885	0.0303427	2.17786	0.000458597	1.6256	0.061166	0.911475	1.18973
mitochondrion
	Cre03.g200350		SMM12	chromosome_3:8167055-8173016	(M=2) PTHR10108//PTHR10108:SF275 - METHYLTRANSFERASE // SUBFAMILY NOT NAMED		Methyltransferase domain	AdoMet_MTases superfamily; PLPDE_III superfamily	contains methyltransferase domain; similar to CMV 1a interacting protein 1 from Nicotiana tabacum							22.2934	18.9406	51.3479	22.3651	26.1044	23.3264	73.346	20.4916	50.357	23.8539	1.17702	0.69942	2.29589	0.000458597	1.11909	0.752164	3.57932	2.11106
	Cre03.g154850		COQ4	chromosome_3:1870191-1874321	Ubiquinone biosynthesis protein	Ubiquinone biosynthesis protein COQ4 homolog	Coenzyme Q (ubiquinone) biosynthesis protein Coq4	Coq4 superfamily		AT2G03690.1	coenzyme Q biosynthesis Coq4 family protein / ubiquinone biosynthesis Coq4 family protein	YDR204W	COenzyme Q			6.50368	6.28035	11.1952	5.70125	7.88719	5.87469	10.1052	5.14327	6.8692	5.71799	1.03556	0.972487	1.96364	0.000458597	1.34257	0.358747	1.96474	1.20133
	Cre01.g029000	COQD2	COQ5D	chromosome_1:4301352-4303931	Ubiquinone/menaquinone biosynthesis methyltransferase	UbiE/COQ5 methyltransferase family; possibly functioning in chloroplast. Previously annotated as COQ5D	Methyltransferase domain	AdoMet_MTases superfamily								7.32193	6.97627	18.957	4.69438	18.2853	14.9546	13.3834	14.7398	12.7757	12.4107	1.04955	0.961787	4.03823	0.000458597	1.22272	0.525261	0.907977	1.02941
	Cre12.g522600	CYC2	CYC	chromosome_12:4591506-4593282	mitochondrial cytochrome c	Mitochondrial apocytochrome c [gi:117971; PMID: 2853233]. Previously annotated as CYC	Cytochrome c	Cytochrom_C superfamily; CccA		AT4G10040.1	cytochrome c-2	YJR048W	CYtochrome C			376.578	254.05	603.165	252.018	333.2	240.552	205.952	268.742	314.808	285.666	1.4823	0.113521	2.39334	0.000458597	1.38515	0.267517	0.766356	1.10201
	Cre02.g115800			chromosome_2:6435307-6437643	(M=3) PF01987 - Mitochondrial biogenesis AIM24		Mitochondrial biogenesis AIM24	AIM24 superfamily								21.7635	16.0606	30.4185	12.1174	25.6851	16.6862	38.0588	25.8926	19.6191	36.4521	1.35509	0.361899	2.51032	0.000458597	1.5393	0.11712	1.46987	0.538216
	Cre03.g186150			chromosome_3:5531524-5534010	(M=2) PTHR12499 - OPTIC ATROPHY 3 PROTEIN (OPA3)		Optic atrophy 3 protein (OPA3)	OPA3 superfamily		AT1G28510.1	Optic atrophy 3 protein (OPA3)					20.9101	14.8113	28.2606	13.4997	19.9598	12.7276	23.3872	30.0429	18.0295	16.036	1.41177	0.195064	2.09342	0.000458597	1.56823	0.0850759	0.77846	1.12431
	Cre03.g144827			chromosome_3:362035-364121	(M=3) PF07802 - GCK domain		GCK domain	GCK superfamily		AT5G23395.1	Cox19-like CHCH family protein					23.135	14.01	33.264	15.8412	26.1853	15.7475	21.6328	39.9714	15.2894	20.7125	1.65132	0.0352928	2.09984	0.000458597	1.66282	0.0493843	0.541207	0.738173
	Cre12.g496150			chromosome_12:3480229-3485170	(M=7) PTHR20953 - KINASE-RELATED		ATPase family associated with various cellular activities (AAA)	ABC_ATPase superfamily		AT1G33290.1	P-loop containing nucleoside triphosphate hydrolases superfamily protein					12.9167	8.74366	20.0702	5.17715	23.1661	9.4733	12.0962	8.25343	8.28639	22.9304	1.47726	0.0935852	3.87669	0.000458597	2.44541	0.00317004	1.4656	0.361371
	Cre16.g676350			chromosome_16:6029175-6044867	(M=1) PTHR23073//PTHR23073:SF19 - 26S PROTEASE REGULATORY SUBUNIT		ATPase family associated with various cellular activities (AAA)	ABC_ATPase superfamily								10.4132	7.2571	16.1994	7.23967	16.3456	9.80823	10.7364	10.043	8.69149	4.16314	1.4349	0.149711	2.23759	0.000458597	1.66652	0.034456	1.06904	2.08772
	Cre09.g388150		MRPL36	chromosome_9:2913538-2915530	Mitochondrial ribosomal protein L36	Putative mitochondrial ribosomal protein L36, imported to mitochondria	Ribosomal protein L36	Ribosomal_L36 superfamily		AT5G20180.2	Ribosomal protein L36	YPL183W-A	Restriction of Telomere Capping			39.8896	34.097	63.2979	28.2775	73.6859	34.3948	16.6456	24.0802	21.2856	37.2605	1.16989	0.716406	2.23845	0.000458597	2.14236	0.00317004	0.691257	0.571264
	Cre02.g106450		LCA1	chromosome_2:5266213-5270979	(M=1) PTHR23070//PTHR23070:SF3 - BCS1 AAA-TYPE ATPASE // SUBFAMILY NOT NAMED		ATPase family associated with various cellular activities (AAA)	ABC_ATPase superfamily; AAA								60.2914	23.485	122.418	13.7736	133.193	122.223	85.8088	105.956	47.7911	6.64771	2.56723	0.00307393	8.88787	0.000458597	1.08975	0.832832	0.809853	7.18911
	Cre05.g234661		BCS1	chromosome_5:2239461-2243977	Ubiquinol:cytochrome c oxidoreductase biogenesis factor	Related to ubiquinol:cytochrome c oxidoreductase (Complex III) BCS1 biogenesis factor; similar to yeast Bcs1p mitochondrial protein required for expression of functional Rieske iron-sulfur protein; region related to AAA family ATPase [PMID: 15710684]	ATPase family associated with various cellular activities (AAA)	AAA; ABC_ATPase superfamily								40.8845	13.9113	80.6115	12.5061	90.4927	60.7336	60.8491	71.1976	28.3075	11.2949	2.93894	0.00307393	6.44577	0.000458597	1.48999	0.163528	0.854651	2.50622
cytochrome c oxidase
	Cre02.g146700			chromosome_2:7120049-7121984	(M=1) PTHR13523 - COILED-COIL-HELIX-COILED-COIL-HELIX DOMAIN CONTAINING 2/NUR77		CHCH domain	CHCH superfamily		AT5G09570.1	Cox19-like CHCH family protein					224.817	166.837	282.494	141.703	241.478	167.076	121.77	151.422	159.935	207.798	1.34752	0.287615	1.99356	0.000458597	1.44532	0.191463	0.804176	0.769666
	Cre07.g357800	CCDA1	CCA1	chromosome_7:6388990-6391304	Cytochrome C assembly/biogenesis protein	Putative protein involved in Cytochrome c assembly in the chloroplast; putative thiol-disulfide interchange protein	Cytochrome C biogenesis protein transmembrane region	DsbD; TauE superfamily		AT5G54290.1	cytochrome c biogenesis protein family					16.5694	12.1726	32.579	13.9518	20.6867	15.325	17.657	14.7364	13.6445	13.7631	1.3612	0.322429	2.33511	0.000458597	1.34987	0.302173	1.19819	0.991383
	Cre03.g157700		COX5C	chromosome_3:2238613-2240089	Cytochrome c oxidase 11 kD subunit	Cytochrome c oxidase, subunit 5c (mitochondrial precursor)(homolog of complex V subunit 5c of A. thaliana (At3g62400, At2g47380); PMID: 15710684. No counterpart in fungi or animals.	Cytochrome c oxidase subunit Vc (COX5C)	PLN03155 superfamily		AT5G61310.4	Cytochrome c oxidase subunit Vc family protein					250.824	240.321	451.496	229.563	297.362	236.162	408.069	226.33	404.032	329.132	1.0437	0.954704	1.96676	0.000458597	1.25914	0.467577	1.80298	1.22757
	Cre02.g082700		COX15	chromosome_2:1259186-1265628	Cytochrome c oxidase assembly factor, mitochondrial	Cytochrome c oxidase (complex IV) assembly factor, mitochondrial respiratory chain	Cytochrome oxidase assembly protein	COX15-CtaA superfamily		AT5G56090.1	cytochrome c oxidase 15	YER141W	Cytochrome c OXidase			7.76271	5.47909	13.859	5.9557	10.2659	6.74746	25.0801	12.6944	12.8542	13.2913	1.41679	0.265334	2.32701	0.000458597	1.52145	0.113148	1.97568	0.967114
	Cre10.g454550		COX19	chromosome_10:4885570-4888486	Cytochrome c oxidase assembly protein	Similar to Cox19 protein, involved in assembly of cytochrome oxidase PMID: 15710684	CHCH domain	CHCH superfamily		AT1G66590.2	cytochrome c oxidase 19-1	YLL018C-A	Cytochrome c OXidase			6.75385	6.1924	17.8794	8.05562	8.09295	6.7746	4.81485	2.04292	8.86737	7.90148	1.09067	0.947851	2.21949	0.000458597	1.1946	0.730642	2.35685	1.12224
	Cre01.g055550		COX11	chromosome_1:7783857-7787774	Cytochrome c oxidase assembly protein	Protein involved in assembly of copper in mitochondrial cytochrome c oxidase; (= yeast COX11) PMID: 15710684	Cytochrome c oxidase assembly protein CtaG/Cox11	CtaG_Cox11 superfamily		AT1G02410.1	cytochrome c oxidase assembly protein CtaG / Cox11 family	YPL132W	Cytochrome c OXidase			11.974	9.70369	20.1469	7.8929	12.2089	8.13588	12.7946	10.2487	12.7348	12.3247	1.23396	0.601728	2.55253	0.000458597	1.50062	0.134839	1.24841	1.03327
	Cre17.g732850		SCO1	chromosome_17:4566017-4568383	Cytochrome c oxidase assembly factor, SCO1/SenC	Mitochondrion-associated cytochrome c oxidase assembly factor SCO1/SenC; precursor of mitochondrial protein. Previously annotated as SCO1	SCO1/SenC			AT3G08950.1	electron transport SCO1/SenC family protein	YBR037C	Suppressor of Cytochrome Oxidase deficiency			26.6164	18.0442	53.7256	19.078	32.6591	17.8351	14.7937	10.7901	27.1467	30.9617	1.47507	0.106295	2.8161	0.000458597	1.83117	0.014392	1.37104	0.876783
	Cre05.g232850		COX17	chromosome_5:411020-412802	Cytochrome c oxidase assembly protein	Putative cytochrome c oxidase assembly protein/Cu2+ chaperone COX17; gi|9022432; gb|AF280543; Chlamydomonas reinhardtii putative copper chaperone Cox17	Cytochrome C oxidase copper chaperone (COX17)	COX17 superfamily		AT3G15352.1	cytochrome c oxidase 17	YLL009C	Cytochrome c OXidase			53.1823	44.9881	103.294	41.3857	72.1881	41.5599	61.1178	30.3238	72.2499	86.3927	1.18214	0.678752	2.49589	0.000458597	1.73697	0.0238165	2.01551	0.836296
	Cre16.g682587			chromosome_16:7247007-7248609	(M=1) KOG4148 - Uncharacterized conserved protein		Cytochrome c oxidase biogenesis protein Cmc1 like	Cmc1 superfamily		AT4G21192.2	Cytochrome c oxidase biogenesis protein Cmc1-like	YBL059C-A	Cx9C Motif-Containing protein			18.4218	12.7541	40.5225	13.3818	21.723	12.4368	33.3706	17.3386	22.4602	22.7843	1.44438	0.216641	3.02818	0.000458597	1.74667	0.0229284	1.92464	0.985775
autophagy/apoptosis
	Cre10.g435200			chromosome_10:2371662-2374194				APG6								14.2121	10.2212	25.3348	12.3793	21.9105	14.1329	4.79733	4.01058	6.77349	8.89108	1.39045	0.262084	2.04655	0.000458597	1.55032	0.0975836	1.19617	0.76183
	Cre06.g291900		PHD1	chromosome_6:6331641-6335455	Phosducin-like protein	Phosducin (Phd)-like family, Viral inhibitor of apoptosis (IAP)-associated factor (VIAF) subfamily; VIAF is a Phd-like protein that functions in caspase activation during apoptosis; cd02988	Phosducin	Phd_like_VIAF; Thioredoxin_like superfamily; Phosducin		AT5G14240.1	Thioredoxin superfamily protein	YOR281C	Phosducin-Like Protein			22.3214	16.5191	37.7959	17.049	27.5809	20.2852	27.0453	28.8663	28.8882	20.9335	1.35125	0.288861	2.2169	0.000458597	1.35966	0.272996	0.936916	1.38
	Cre01.g035450			chromosome_1:5096408-5100565	(M=1) PTHR23291//PTHR23291:SF15 - BAX INHIBITOR-RELATED // UNCHARACTERIZED		Inhibitor of apoptosis-promoting Bax1	LFG_like; BI-1-like superfamily		AT1G03070.2	Bax inhibitor-1 family protein	YNL305C	BaX Inhibitor			35.932	22.7617	59.2601	14.6504	44.8011	23.9244	32.2211	20.3243	25.5445	39.5246	1.57862	0.0207291	4.04495	0.000458597	1.87261	0.0129658	1.58535	0.646294
	Cre02.g102350		APG3	chromosome_2:4743267-4746546	Autophagy-related protein	Expressed Protein. Similar to Aut1p/Apg3p protein involved in autophagy.; Conjugates the ubiquitin-like protein APG8 to lipid molecules during autophagy	Autophagocytosis associated protein (Atg3), N-terminal domain; Autophagocytosis associated protein C-terminal	Autophagy_N superfamily; Autophagy_act_C superfamily; Autophagy_Cterm superfamily		AT5G61500.1	autophagy 3 (APG3)	YNR007C	AuTophaGy related			23.1134	15.8301	38.3226	13.0546	36.2052	20.4353	41.0418	35.7276	24.4842	27.9887	1.46009	0.134927	2.93556	0.000458597	1.7717	0.0229284	1.14874	0.874789
	Cre12.g517451			chromosome_12:4048369-4052095	(M=1) KOG1546 - Metacaspase involved in regulation of apoptosis		Caspase domain	Peptidase_C14; CASc superfamily		AT4G25110.1	metacaspase 2	YOR197W	MetaCAspase			10.509	7.67599	16.5712	5.86848	16.0312	7.67162	10.1614	7.52478	7.17776	8.24015	1.36907	0.298428	2.82376	0.000458597	2.08968	0.00317004	1.35039	0.871072
cell wall
	Cre11.g467710		VSP1	chromosome_11:1292714-1295811	Hydroxyproline-rich cell wall protein	Extracellular matrix protein (cell wall protein); vegetative HRGP and tyrosine-rich wall protein; structural protein [PMID: 7689882; Genbank entry L16461]		Trypan_PARP								76.3216	75.5311	91.6088	40.3773	71.5883	69.2031	49.496	31.5626	53.1012	139.149	1.01047	0.990371	2.26882	0.000458597	1.03447	0.933129	1.56819	0.381614
	Cre09.g404201		PHC10	chromosome_9:494999-503449	(M=50) KOG2302 - T-type voltage-gated Ca2+ channel, pore-forming alpha1I subunit		Pherophorin	DUF3707 superfamily								8.02768	0.366148	31.6623	0.433943	53.4742	38.3612	4.53794	1.65566	12.3126	69.6154	21.9247	0.00307393	72.9642	0.000458597	1.39397	0.292001	2.74086	0.176866
	Cre02.g081700			chromosome_2:1153655-1157872	(M=71) PF12499 - Pherophorin		Pherophorin	DUF3707 superfamily								7.35094	0.776984	12.7136	1.14482	20.7305	14.7691	9.4148	5.12078	5.37226	113.853	9.46086	0.00307393	11.1053	0.000458597	1.40364	0.24811	1.83855	0.0471859
ribosome
	Cre03.g207050	RPL29		chromosome_3:7288443-7289403	Ribosomal protein L29, component of cytosolic 80S ribosome and 60S large subunit	Cytosolic 80S ribosomal protein L29; Cytosolic 60S large ribosomal subunit protein L29	Ribosomal L29e protein family	Ribosomal_L29e superfamily		AT3G06700.3	Ribosomal L29e protein family	YFR032C-A	Ribosomal Protein of the Large subunit			4059.68	3497.43	4134.87	1874.12	2715.42	3046.64	5058.54	4583.04	5560.62	9189.19	1.16076	0.778129	2.2063	0.000458597	0.891284	0.760384	1.10375	0.605126
	Cre07.g325746		RPL38	chromosome_7:1925291-1926463	Ribosomal protein L38, component of cytosolic 80S ribosome and 60S large subunit	Cytosolic 80S ribosomal protein L38; Cytosolic 60S large ribosomal subunit protein L38	Ribosomal L38e protein family	Ribosomal_L38e superfamily		AT3G59540.1	Ribosomal L38e protein family	YLR325C	Ribosomal Protein of the Large subunit			2688.56	2126.86	2576.32	1299.6	1939.89	1737.73	2363.02	2174.7	2551.01	3005.55	1.2641	0.547156	1.98239	0.000458597	1.11634	0.778259	1.0866	0.848766
	Cre03.g203450	RPS21		chromosome_3:7727415-7728040	Ribosomal protein S21, component of cytosolic 80S ribosome and 40S small subunit	Cytosolic 80S ribosomal protein S21; Cytosolic 40S small ribosomal subunit protein S21	Ribosomal protein S21e	Ribosomal_S21e superfamily		AT5G27700.1	Ribosomal protein S21e	YKR057W	Ribosomal Protein of the Small subunit			5796.57	4965.16	5302.14	2343.24	3297.32	3701.3	8603.08	8174.27	7631.51	7543.9	1.16745	0.766274	2.26274	0.000458597	0.890855	0.76447	1.05246	1.01161
	Cre03.g159650	EFG6		chromosome_3:2485964-2492538	GTP binding protein	Putative GTP-binding protein 1, GP-1, elongation factor Tu domains	Elongation factor Tu GTP binding domain; Elongation factor Tu domain 2; Elongation factor Tu C-terminal domain	GTPBP1_like; ABC_ATPase superfamily; GTPBP_III; Translation_factor_III superfamily; GTPBP_II; Translation_Factor_II_like superfamily; GTPBP1								30.5037	30.3957	53.1725	25.3105	50.8967	34.28	24.31	21.2978	24.7622	27.7772	1.00355	0.996291	2.10081	0.000458597	1.48473	0.132238	1.14143	0.891458
	Cre02.g145250	RPS27E2	RPS27-B	chromosome_2:7317962-7320198	Ribosomal protein S27e isoform 2, component of 80S ribosome and 40S small subunit	Cytosolic 80S ribosomal protein S27e, isoform 2; Cytosolic 40S small ribosomal subunit protein S27e, isoform 2. Previously annotated as RPS27-B	Ribosomal protein S27	PLN00209; Ribosomal_S27e superfamily								29.5373	31.5562	46.1266	21.8754	52.1426	30.7487	16.686	15.103	21.7897	50.8433	0.936022	0.922139	2.10861	0.000458597	1.69577	0.0318285	1.10481	0.428566
	Cre02.g076600			chromosome_2:467759-470227	(M=1) PTHR17224 - PEPTIDYL-TRNA HYDROLASE		Peptidyl-tRNA hydrolase	PTH superfamily		AT1G18440.1	Peptidyl-tRNA hydrolase family protein	YHR189W	Peptidyl-Trna Hydrolase			8.3354	6.29938	19.8498	4.33142	15.5685	9.07448	10.175	14.0169	6.88798	9.64412	1.32321	0.56876	4.58275	0.000458597	1.71564	0.0456544	0.725909	0.714216
	Cre01.g017500			chromosome_1:2879002-2882844	(M=1) PTHR10927 - RIBOSOME MATURATION PROTEIN SBDS		Shwachman-Bodian-Diamond syndrome (SBDS) protein; SBDS protein C-terminal domain	SBDS superfamily; SBDS_C superfamily; COG1500		AT1G43860.1	sequence-specific DNA binding transcription factors	YLR022C				28.2118	22.7846	50.4332	24.2998	48.6651	29.4521	28.4165	34.9911	21.8604	17.7906	1.2382	0.548512	2.07546	0.000458597	1.65235	0.0311026	0.812107	1.22876
	Cre10.g435500	EFT2		chromosome_10:2409322-2412392	Elongation factor Ts-like protein	Elongation factor Ts-like protein, homolog of Arabidopsis AAV43776 - pfam00889, EF_TS	Elongation factor TS	UBA_like_SF superfamily		AT4G11120.1	translation elongation factor Ts (EF-Ts), putative					12.604	7.73034	16.4256	7.92633	14.7821	8.36832	13.0877	14.3517	9.51323	17.464	1.63046	0.0901875	2.07228	0.000458597	1.76644	0.036109	0.911927	0.544734
unclassified / unknown
	Cre08.g377550			chromosome_8:3837132-3839757	(M=2) PTHR13847//PTHR13847:SF40 - FAD NAD BINDING OXIDOREDUCTASES // SUBFAMILY NOT NAMED		Yippee zinc-binding/DNA-binding /Mis18, centromere assembly	Yippee-Mis18 superfamily		AT4G27745.1	Yippee family putative zinc-binding protein	YBL049W				124.516	122.328	155.969	72.5591	115.672	86.4453	49.8798	29.7415	74.6452	126.794	1.01789	0.985557	2.14954	0.000458597	1.33809	0.325241	1.67711	0.588712
	Cre07.g355500			chromosome_7:6101543-6104271	(M=2) PTHR13847//PTHR13847:SF40 - FAD NAD BINDING OXIDOREDUCTASES // SUBFAMILY NOT NAMED		Yippee zinc-binding/DNA-binding /Mis18, centromere assembly	Yippee-Mis18 superfamily		AT5G53940.1	Yippee family putative zinc-binding protein					13.771	13.1551	15.7684	6.10436	22.5799	15.3418	47.8523	33.0591	32.7866	61.184	1.04682	0.953959	2.58314	0.000458597	1.47179	0.158576	1.44748	0.535869
	Cre02.g074550			chromosome_2:199609-201086												17.9132	15.2222	15.2818	7.8043	14.4383	16.0988	12.1748	12.3064	15.8997	20.6838	1.17678	0.7463	1.95813	0.000458597	0.896856	0.775864	0.989306	0.768703
	Cre07.g346900			chromosome_7:4987084-4990515					duplication of Cre07.g346850, Cre07.g346950 and Cre12.g507800							1.00273	2.04628	525.06	46.5066	161.037	156.491	980.022	24.5204	1929.22	10.7857	0.490026	0.134927	11.29	0.000458597	1.02905	0.947016	39.9676	178.868
	Cre07.g346850			chromosome_7:4980659-4983645					duplication of Cre07.g346900, Cre07.g346950 and Cre12.g507800							3.35317	3.6273	174.589	10.2877	6.83271	5.43622	362.272	4.99537	404.327	4.29333	0.924426	0.940676	16.9707	0.000458597	1.25689	0.505682	72.5216	94.1756
	Cre03.g154600			chromosome_3:1837761-1841321				TPM superfamily								16.5957	12.473	25.7639	12.4573	18.8887	14.3074	24.3791	20.58	18.3793	22.4205	1.33053	0.378907	2.06818	0.000458597	1.3202	0.346149	1.1846	0.819754
	Cre09.g416450			chromosome_9:7809710-7813141				DUF563 superfamily								21.6132	16.5938	40.7043	15.7268	27.5234	19.1218	20.6723	12.3036	17.82	21.1453	1.30249	0.392652	2.58821	0.000458597	1.43937	0.171668	1.68018	0.84274
	Cre12.g544600			chromosome_12:8881947-8886363												7.8483	6.24067	15.6668	5.29591	14.8398	10.0888	6.91072	8.54265	4.5023	3.70112	1.25761	0.566218	2.95828	0.000458597	1.47092	0.147556	0.808967	1.21647
	Cre03.g144144			chromosome_3:151127-156395												25.5992	21.4877	47.6835	21.6094	27.6711	17.6304	2.41918	2.46488	7.86371	10.4873	1.19134	0.641874	2.20661	0.000458597	1.56951	0.0672523	0.98146	0.749832
	Cre02.g087250			chromosome_2:1844441-1846620												76.2435	51.9077	151.397	46.0346	102.369	64.0744	35.452	33.8982	44.3799	59.25	1.46883	0.0836921	3.28877	0.000458597	1.59766	0.062111	1.04584	0.749028
	Cre11.g467752			chromosome_11:1537130-1540162						AT4G26240.1						12.8247	10.0036	23.9402	8.11643	19.1532	11.9735	8.0956	4.62082	12.2404	17.0265	1.28201	0.527283	2.9496	0.000458597	1.59963	0.0687305	1.75198	0.718903
	Cre07.g333350			chromosome_7:3014129-3015095												7.58483	3.6931	14.9489	2.24244	13.3982	7.97154	2.16459	1.79186	2.7828	3.01963	2.05378	0.109016	6.66635	0.000458597	1.68075	0.116215	1.20801	0.92157
	Cre06.g306400			chromosome_6:8340203-8346401	(M=1) 4.4.1.14 - 1-aminocyclopropane-1-carboxylate synthase.		Aminotransferase class I and II	AAT_I superfamily; Aminotran_1_2		AT3G49700.1	1-aminocyclopropane-1-carboxylate synthase 9					14.487	10.7891	28.9746	12.0669	29.5868	19.0541	22.9244	21.8517	15.3497	12.4087	1.34274	0.308476	2.40116	0.000458597	1.55278	0.0893532	1.04909	1.23701
	Cre01.g031600			chromosome_1:4602246-4604173	(M=1) PTHR15664 - C20ORF30 PROTEIN		Eukaryotic protein of unknown function (DUF872)	DUF872 superfamily		AT2G19350.1	Eukaryotic protein of unknown function (DUF872)					23.2521	20.3336	33.8605	13.5118	30.3777	20.7791	16.4326	12.7403	13.2553	24.4945	1.14353	0.793502	2.50599	0.000458597	1.46194	0.144611	1.28981	0.541154
	Cre01.g013500			chromosome_1:2421966-2426463	(M=3) PF01814 - Hemerythrin HHE cation binding domain		Hemerythrin HHE cation binding domain	Hemerythrin-like superfamily								31.4341	45.2919	25.4076	12.9305	15.6461	12.728	3.2155	1.55429	7.4522	19.9207	0.694034	0.122145	1.96494	0.000458597	1.22927	0.526066	2.06879	0.374093
	Cre02.g086500		PGM10	chromosome_2:1753756-1757022	(M=4) KOG4754 - Predicted phosphoglycerate mutase		Histidine phosphatase superfamily (branch 1)	His_Phos_1; HP superfamily								9.04329	8.095	20.4167	7.47016	20.0927	14.181	12.6035	16.1075	7.58365	6.28136	1.11715	0.860953	2.7331	0.000458597	1.41687	0.200033	0.782462	1.20733
	Cre13.g569350		SNE16	chromosome_13:1113555-1117906	(M=1) PTHR10366:SF10 - NAD DEPENDENT EPIMERASE/DEHYDRATASE		NAD dependent epimerase/dehydratase family	SDR superfamily								17.065	11.677	24.6229	9.98001	19.8448	14.9904	15.9308	17.1045	10.5433	8.52605	1.46142	0.10231	2.46722	0.000458597	1.32383	0.322476	0.931381	1.2366
	Cre08.g381800			chromosome_8:4373360-4377016	(M=1) PTHR23422 - DIPEPTIDYL PEPTIDASE III-RELATED		NUDIX domain	Nudix_Hydrolase superfamily		AT1G79690.1	nudix hydrolase homolog 3					40.2172	29.297	64.2162	23.9767	50.5235	33.4178	35.5598	31.7008	27.3037	31.3167	1.37274	0.217989	2.67828	0.000458597	1.51187	0.101749	1.12173	0.871858
	Cre07.g352550	RDP3		chromosome_7:5694836-5696642	Putative rhodanese domain phosphatase	Putative rhodanese domain phosphatase similar to CDC25; M-phase inducer phosphatase. Putative function in G2/M	Rhodanese-like domain	RHOD superfamily		AT5G03455.1	Rhodanese/Cell cycle control phosphatase superfamily protein					28.5864	25.1094	25.9762	9.94064	52.056	40.4679	10.4517	17.2113	31.9431	67.9551	1.13847	0.809754	2.61313	0.000458597	1.28635	0.395239	0.607258	0.470062
	Cre16.g691353			chromosome_16:711485-713448	(M=15) PF07719 - Tetratricopeptide repeat		Tetratricopeptide repeat	TPR superfamily								24.7078	16.3751	46.8449	17.4276	35.0365	22.364	21.0708	18.9351	18.3847	24.584	1.50886	0.105566	2.68797	0.000458597	1.56665	0.0767677	1.11279	0.747832
	Cre13.g565250			chromosome_13:523852-527855	(M=8) PF00582 - Universal stress protein family		Universal stress protein family	USP_Like; AANH_like superfamily								15.7656	10.7379	22.8912	11.0727	16.7011	11.8301	11.0813	9.88112	12.1125	14.6384	1.46822	0.156696	2.06735	0.000458597	1.41175	0.212194	1.12146	0.827447
	Cre07.g346950			chromosome_7:4996499-5000945					duplication of Cre07.g346850, Cre07.g346900 and Cre12.g507800							4.17251	3.01649	633.059	109.165	194.198	201.739	331.109	19.6915	935.236	1.91876	1.38323	0.40066	5.7991	0.000458597	0.96262	0.928403	16.8148	487.417
	Cre09.g397660			chromosome_9:4864243-4867680				PAN_APPLE superfamily; DEC-1_N superfamily								33.1223	22.8056	31.2516	10.3504	54.0859	55.2116	16.1243	14.3261	38.8463	145.868	1.45238	0.107435	3.01936	0.000458597	0.979611	0.961576	1.12552	0.266311
	Cre09.g405106			chromosome_9:360936-362619												961.909	741.102	948.068	466.951	673.489	659.673	1250.92	1035.82	1834.12	1934.46	1.29794	0.455357	2.03034	0.000458597	1.02094	0.964644	1.20766	0.94813
	Cre09.g393100			chromosome_9:2185960-2191671					Chlamydomonas / Volvox specific							3.8218	3.4659	13.676	5.42821	10.0578	9.29606	12.5546	1.26058	33.9687	5.26567	1.10269	0.88978	2.51943	0.000458597	1.08194	0.834906	9.95938	6.45097
	Cre16.g649300			chromosome_16:1032345-1036382												16.358	17.9401	45.7151	21.436	20.5274	18.8678	27.1542	11.4362	48.0058	15.5613	0.911812	0.871785	2.13263	0.000458597	1.08796	0.821945	2.37441	3.08495
	Cre09.g396800			chromosome_9:1708074-1712524												45.9877	51.2358	45.445	23.2662	50.813	45.4839	19.9163	16.2121	29.4377	72.7673	0.89757	0.84451	1.95326	0.000458597	1.11716	0.760904	1.22848	0.404546
	Cre12.g498300			chromosome_12:3264272-3266588												8.46009	8.14079	17.7642	8.00567	11.2357	9.71987	12.079	10.7027	7.65814	9.7915	1.03922	0.968802	2.21895	0.000458597	1.15595	0.689839	1.12859	0.782121
	Cre01.g040100			chromosome_1:5634363-5637686				R3H-assoc superfamily; R3H superfamily	The name of the R3H domain comes from the characteristic spacing of the most conserved arginine and histidine residues. R3H domains are found in proteins together with ATPase domains, SF1 helicase domains, SF2 DEAH helicase domains, Cys-rich repeats, ring-type zinc fingers, and KH domains. The function of the domain is predicted to bind ssDNA or ssRNA in a sequence-specific manner.	AT1G03250.1						8.61261	7.44178	16.5698	7.39893	16.1339	13.5922	14.3286	16.7409	10.9002	8.8293	1.15733	0.807491	2.23949	0.000458597	1.187	0.606883	0.855904	1.23455
	Cre07.g353900			chromosome_7:5888442-5893404												11.9355	10.5161	15.6584	7.64861	11.2998	9.50319	4.8046	3.12431	15.26	16.6856	1.13497	0.808897	2.04722	0.000458597	1.18905	0.600649	1.53781	0.914561
	Cre02.g117700			chromosome_2:6667946-6669565				UPF0150 superfamily								13.068	9.45602	17.0332	7.55728	14.1508	11.8517	11.5033	12.6279	13.9798	23.9752	1.38198	0.336262	2.25388	0.000458597	1.19399	0.610673	0.910943	0.583094
	Cre16.g673505			chromosome_16:6758480-6761415												9.32246	9.99261	19.631	6.76726	15.4469	12.8634	14.4364	12.1215	12.8883	15.9596	0.932935	0.937522	2.90088	0.000458597	1.20084	0.588764	1.19097	0.807558
	Cre12.g558050			chromosome_12:7262054-7263443												22.7976	20.1083	23.3368	10.6164	13.4797	11.004	15.7	9.87845	15.7871	38.3679	1.13374	0.835983	2.19818	0.000458597	1.22498	0.573254	1.58932	0.411466
	Cre16.g673050			chromosome_16:6493524-6496515												11.8462	6.92766	16.1742	8.18812	7.78841	6.3216	16.9325	3.05256	12.4481	13.5075	1.70999	0.0566052	1.97533	0.000458597	1.23203	0.586293	5.54698	0.921569
	Cre09.g387949			chromosome_9:3266999-3274079												25.6062	17.503	39.4067	14.8018	32.8903	26.2966	28.1796	20.8911	21.8213	41.1944	1.46296	0.0969723	2.66229	0.000458597	1.25074	0.460832	1.34888	0.529715
	Cre02.g096750			chromosome_2:3975359-3982195												23.8835	21.0092	29.1965	14.2477	18.0752	14.3696	21.0725	20.0577	19.7052	16.659	1.13681	0.804599	2.04921	0.000458597	1.25788	0.458573	1.05059	1.18286
	Cre12.g483850			chromosome_12:84671-85365												366.234	306.635	586.762	271.866	388.165	308.153	905.572	537.719	1478.28	1469.45	1.19436	0.641236	2.15828	0.000458597	1.25965	0.446015	1.6841	1.00601
	Cre10.g419650			chromosome_10:272973-274746												33.8241	32.2226	44.5551	18.0223	35.8552	28.4066	41.339	26.9853	30.3881	38.9848	1.0497	0.94768	2.47222	0.000458597	1.26221	0.433765	1.53191	0.779486
	Cre07.g349350			chromosome_7:5284874-5286164						AT1G72020.1						506.574	473.296	877.675	448.787	604.439	478.832	530.48	340.673	644.193	626.082	1.07031	0.921171	1.95566	0.000458597	1.26232	0.473812	1.55715	1.02893
	Cre02.g113000			chromosome_2:6083116-6086275	(M=2) PTHR10502 - ANNEXIN											29.588	28.0875	41.9338	20.0906	37.5882	29.6054	32.7681	30.2978	29.4329	40.218	1.05342	0.944465	2.08723	0.000458597	1.26964	0.42319	1.08153	0.731834
	Cre17.g697406			chromosome_17:177023-181485				MPP_superfamily superfamily								21.4367	16.1475	37.6472	19.064	31.3865	24.603	20.1049	22.9399	13.9527	4.68513	1.32756	0.296917	1.97478	0.000458597	1.27572	0.42319	0.876416	2.97808
	Cre16.g690130			chromosome_16:3875702-3878299						AT4G30845.1						27.4323	26.4715	57.7759	15.9455	27.0614	21.0962	115.338	24.0899	62.2544	33.0243	1.0363	0.964363	3.62334	0.000458597	1.28276	0.406431	4.78782	1.88511
	Cre10.g458900			chromosome_10:5472906-5478314												25.526	20.9694	36.0944	13.5569	31.9517	24.7748	32.2946	29.6202	27.6904	48.6543	1.2173	0.592678	2.66244	0.000458597	1.28969	0.387682	1.09029	0.569125
	Cre03.g195000			chromosome_3:6490107-6492044												42.4963	38.9558	70.5509	32.8919	52.0677	40.112	29.3904	32.9516	23.1294	33.0395	1.09089	0.876789	2.14493	0.000458597	1.29806	0.379551	0.891926	0.700053
	Cre16.g667250			chromosome_16:4530310-4532917												32.4252	35.9468	20.2586	9.79788	31.5856	24.3075	26.2074	12.3698	77.1203	93.1507	0.902033	0.84792	2.06765	0.000458597	1.29942	0.377555	2.11866	0.827909
	Cre09.g400700			chromosome_9:1049805-1052181												8.12385	8.14674	14.9153	7.56585	8.79205	6.51235	4.49072	2.8513	8.97264	11.4911	0.99719	0.997323	1.9714	0.000458597	1.35006	0.34366	1.57497	0.780834
	Cre16.g681200			chromosome_16:5428691-5430293				DUF2058 superfamily								118.281	113.109	164.858	71.4265	142.752	105.651	0.062892	0	159.273	251.237	1.04573	0.948867	2.30808	0.000458597	1.35117	0.291918	n.d.	0.633955
	Cre03.g144184			chromosome_3:162395-164197						AT3G56290.1						15.2154	12.8449	21.3278	10.4511	14.3597	10.5739	6.19143	8.9712	6.01311	10.8175	1.18455	0.746423	2.04072	0.000458597	1.35803	0.331191	0.690145	0.555869
	Cre04.g221550		FAO5	chromosome_4:2442596-2451157	(M=1) PTHR13847:SF34 - GLL2484 PROTEIN			SDR superfamily								21.7207	18.2137	22.4696	8.6527	22.9112	16.7706	19.4387	19.9074	18.0918	24.3241	1.19255	0.65537	2.59683	0.000458597	1.36615	0.258577	0.976456	0.743781
	Cre17.g721553			chromosome_17:3137135-3138496												11.0765	9.24475	21.5483	9.45454	16.7577	12.2638	7.95282	8.10744	17.2126	19.3026	1.19814	0.739532	2.27915	0.000458597	1.36644	0.297297	0.980929	0.891724
	Cre12.g501550			chromosome_12:2945016-2947739												83.1307	63.0647	118.454	53.9088	112.187	81.9613	134.992	145.743	84.1581	64.5207	1.31818	0.339055	2.1973	0.000458597	1.36878	0.284356	0.926233	1.30436
	Cre03.g145307			chromosome_3:530801-532003												3.69833	3.67611	9.93581	2.96262	4.80314	3.50837	5.5364	6.42186	5.66719	5.32748	1.00604	0.997223	3.35372	0.000458597	1.36905	0.484045	0.862118	1.06377
	Cre05.g238301			chromosome_5:2961908-2964298												27.506	29.6131	22.6225	11.0643	22.2492	16.0644	17.9764	13.1956	20.3551	42.1536	0.928846	0.908345	2.04464	0.000458597	1.385	0.239679	1.3623	0.482879
	Cre03.g194750			chromosome_3:6456098-6457784												61.2319	44.2052	85.21	32.2288	73.9577	52.5741	71.094	57.405	37.7739	107.033	1.38517	0.199534	2.64391	0.000458597	1.40673	0.211336	1.23846	0.352918
	Cre15.g636100			chromosome_15:396452-400485												67.3456	58.7468	83.5794	40.927	53.1537	37.5947	9.82457	11.4023	12.5718	18.5562	1.14637	0.776661	2.04216	0.000458597	1.41386	0.199274	0.861631	0.677499
	Cre06.g278115			chromosome_6:3552223-3554432												57.0856	39.5304	62.1254	29.925	71.7297	50.5482	46.2639	44.772	47.567	46.4868	1.44409	0.104833	2.07604	0.000458597	1.41904	0.190663	1.03332	1.02324
	Cre16.g664400			chromosome_16:2984637-2986539				PROF superfamily								40.0446	29.7758	59.6314	25.0767	50.6624	35.665	52.7213	59.0173	36.4219	68.148	1.34487	0.303432	2.37796	0.000458597	1.42051	0.1977	0.893319	0.534453
	Cre13.g575701			chromosome_13:1880439-1882337												102.182	77.7263	133.467	53.7812	106.273	74.2863	22.5592	24.8996	66.5714	121.287	1.31464	0.328642	2.48167	0.000458597	1.43059	0.188352	0.906007	0.548875
	Cre10.g462650			chromosome_10:5984942-5987242												19.0777	16.324	29.7642	13.9042	24.7136	16.8933	9.20624	7.92436	18.2454	26.5463	1.16869	0.735831	2.14066	0.000458597	1.46292	0.156576	1.16176	0.687305
	Cre06.g273550			chromosome_6:2999376-3000917				Neisseria_TspB								76.6786	70.6068	123.673	63.2242	94.764	64.68	45.1454	46.2345	61.5136	85.6724	1.08599	0.887125	1.9561	0.000458597	1.46512	0.154229	0.976444	0.71801
	Cre01.g022200			chromosome_1:3488621-3491566												19.6786	12.9038	27.1199	8.72358	37.1543	25.0792	3.78226	3.35131	8.07109	9.38731	1.52502	0.0653909	3.1088	0.000458597	1.48148	0.124833	1.12859	0.859787
	Cre13.g569150			chromosome_13:1089364-1094734								YKL092C	BUD site selection			12.7414	11.4359	13.5404	6.33131	28.36	19.0765	4.394	4.19119	5.7076	18.4665	1.11416	0.849206	2.13864	0.000458597	1.48665	0.124833	1.04839	0.309079
	Cre09.g398983			chromosome_9:301132-302586												5.34603	4.76918	10.3759	5.2265	5.60676	3.75848	0.99421	0.994933	1.60081	0.827167	1.12095	0.909014	1.98525	0.00118176	1.49176	0.278336	0.999273	1.93529
	Cre05.g230650			chromosome_5:705612-708538												6.28915	5.71576	12.4929	4.62116	12.2552	8.17617	7.95045	6.24042	12.5831	29.3218	1.10032	0.900998	2.70341	0.000458597	1.49889	0.134724	1.27402	0.429138
	Cre04.g217911			chromosome_4:352679-359310												16.5389	15.8938	30.0037	14.9104	24.0649	15.458	11.5841	12.5112	10.6714	12.3848	1.04059	0.957879	2.01227	0.000458597	1.55679	0.0858495	0.925898	0.861653
	Cre13.g570851			chromosome_13:1275206-1278258						AT5G07020.1	proline-rich family protein					1117.95	987.998	1571.41	540.106	1556.74	998.775	560.355	512.401	425.37	776.589	1.13153	0.847974	2.90945	0.000458597	1.55865	0.132447	1.09359	0.547741
	Cre05.g240450			chromosome_5:3319905-3321139												15.0826	10.8629	16.7311	8.17608	21.3657	13.6609	12.217	6.70222	11.3131	23.9057	1.38845	0.419505	2.04635	0.000458597	1.564	0.11893	1.82283	0.473239
	Cre10.g447950			chromosome_10:3906270-3908280												139.975	146.336	261.635	126.45	201.356	125.931	71.7082	59.9944	85.5406	145.429	0.956532	0.951447	2.06908	0.000458597	1.59894	0.0774836	1.19525	0.588195
	Cre16.g661626			chromosome_16:2593834-2597826												164.432	144.412	176.388	80.3157	134.983	83.3855	92.1529	71.269	95.247	107.928	1.13863	0.813877	2.19618	0.000458597	1.61878	0.06168	1.29303	0.882505
	Cre12.g521300			chromosome_12:4441996-4444409												222.744	261.011	332.528	167.561	303.852	186.292	79.5543	48.6598	183.383	194.664	0.853389	0.733057	1.98452	0.000458597	1.63105	0.0774836	1.63491	0.942049
	Cre06.g298802			chromosome_6:7310640-7319383												2.7972	1.04092	13.4869	0.400234	9.57487	5.11896	7.35381	7.4517	4.9015	0.320824	2.68724	0.363122	33.6975	0.0132078	1.87047	0.307348	0.986863	15.2778
	Cre16.g674700		AGH1	chromosome_16:6280053-6284105	(M=1) PTHR16222//PTHR16222:SF10 - ADP-RIBOSYLGLYCOHYDROLASE // SUBFAMILY NOT NAMED		ADP-ribosylglycohydrolase	ADP_ribosyl_GH superfamily								19.4686	14.7634	30.639	15.2309	24.5732	17.5781	22.1216	19.0021	42.0006	20.3453	1.31871	0.341107	2.01163	0.000458597	1.39794	0.216762	1.16417	2.06439
	Cre06.g263500			chromosome_6:1918260-1920898	(M=1) PTHR12682 - ARCHEASE		Archease protein family (MTH1598/TM1083)	Archease superfamily								9.84471	7.4312	16.5144	6.6863	14.9232	10.3315	8.54877	9.16606	10.3668	11.9022	1.32478	0.496231	2.46989	0.000458597	1.44444	0.191303	0.932655	0.870999
	Cre06.g278209		PRL8	chromosome_6:4046019-4052175	Predicted extracellular protein	Similar to pathogenesis-related protein 1, extracellular	Cysteine-rich secretory protein family	SCP superfamily								34.7046	29.8192	28.0581	13.4905	40.5926	33.4919	26.6145	21.91	22.5465	87.6311	1.16383	0.728899	2.07984	0.000458597	1.21201	0.541197	1.21472	0.257289
	Cre01.g056331			chromosome_1:7814036-7816550	(M=1) K03152 - 4-methyl-5(b-hydroxyethyl)-thiazole monophosphate biosynthesis		DJ-1/PfpI family	GATase1_DJ-1; GAT_1 superfamily; transcriptional_regulator_related_protein		AT4G34020.1	Class I glutamine amidotransferase-like superfamily protein					48.1298	63.894	72.7977	36.832	42.4582	34.9816	76.1697	25.6986	76.7551	53.657	0.753276	0.308476	1.97648	0.000458597	1.21373	0.541584	2.96396	1.43048
	Cre06.g278122			chromosome_6:3590778-3596262	(M=1) PTHR10504 - BACTERICIDAL PERMEABILITY-INCREASING (BPI) PROTEIN-RELATED		LBP / BPI / CETP family, C-terminal domain; LBP / BPI / CETP family, N-terminal domain	BPI superfamily								42.0438	34.1721	62.842	31.9963	55.0479	35.001	36.1727	29.8344	21.904	25.3389	1.23035	0.555518	1.96404	0.000458597	1.57275	0.0740881	1.21245	0.864442
	Cre05.g244400			chromosome_5:1376098-1378399	(M=31) PF03407 - Nucleotide-diphospho-sugar transferase		Nucleotide-diphospho-sugar transferase	Glyco_tranf_GTA_type superfamily								54.351	42.1942	84.1019	42.1217	59.4548	39.3198	3.44217	4.6525	5.90457	4.95093	1.28812	0.40066	1.99664	0.000458597	1.51208	0.108963	0.739854	1.19262
	Cre01.g027900			chromosome_1:4202033-4204114	(M=1) PTHR12300:SF20 - HVA22-LIKE PROTEIN		TB2/DP1, HVA22 family	TB2_DP1_HVA22 superfamily		AT5G42560.1	Abscisic acid-responsive (TB2/DP1, HVA22) family protein					6.84858	6.60248	12.2088	5.70363	10.6704	9.77581	5.23462	4.24737	7.16067	14.4806	1.03727	0.981149	2.14053	0.00269753	1.09151	0.859605	1.23244	0.494501
	Cre03.g177500			chromosome_3:4662739-4665469	(M=4) PTHR12300 - HVA22-LIKE PROTEINS		TB2/DP1, HVA22 family	TB2_DP1_HVA22 superfamily								20.0065	16.2592	32.8666	13.5101	26.433	17.4043	7.27664	7.00413	11.5745	33.0794	1.23047	0.576864	2.43274	0.000458597	1.51876	0.107772	1.03891	0.349901
	Cre05.g234657			chromosome_5:2227189-2230076	(M=2) PTHR17490 - SUA5		Telomere recombination; Putative GTP-binding controlling metal-binding	Sua5_yciO_yrdC superfamily		AT5G60590.2	DHBP synthase RibB-like alpha/beta domain	YGL169W	Suppressor of Upstream AUG			4.37703	4.7898	10.5973	3.36457	7.09405	5.21268	6.42007	7.34256	3.12899	4.65422	0.913823	0.909776	3.14967	0.000458597	1.36092	0.302223	0.874364	0.672291
	Cre10.g434800			chromosome_10:2319545-2322246	(M=1) PTHR23083:SF65 - TPR REPEAT PROTEIN		Tetratricopeptide repeat	TPR superfamily; UVR superfamily								8.054	6.26697	11.4797	5.21802	10.1498	8.40972	7.6431	7.29113	7.3129	18.5958	1.28515	0.630945	2.20001	0.000458597	1.20691	0.596646	1.04827	0.393255
	Cre10.g425850			chromosome_10:1158095-1161387												61.1544	23.5209	62.5034	14.2885	59.7917	32.0717	14.7052	27.0731	11.456	255.427	2.6	0.00307393	4.37438	0.000458597	1.86431	0.00773763	0.543166	0.0448504
	Cre07.g336900			chromosome_7:3617671-3620862												28.9681	13.7409	58.7115	21.5374	42.4013	21.434	11.5487	14.8511	15.9142	18.0554	2.10817	0.00307393	2.72603	0.000458597	1.97823	0.00317004	0.777633	0.881409
	Cre16.g653650			chromosome_16:1565635-1568027												24.7859	14.9793	43.3947	17.4627	48.3071	23.7771	16.6654	19.0964	18.7278	22.9412	1.65468	0.0170754	2.48499	0.000458597	2.03166	0.00568854	0.872699	0.816339
	Cre06.g278246			chromosome_6:4252505-4255051												9.02671	2.21436	9.94866	2.6247	24.89	6.16344	7.51797	8.85044	6.81682	9.29132	4.07644	0.00307393	3.7904	0.000458597	4.03833	0.00317004	0.849446	0.733676
	Cre12.g495450			chromosome_12:757511-760514												29.213	19.1561	30.2491	15.0297	22.7967	13.7809	14.4355	33.9089	4.80883	7.57757	1.525	0.0484427	2.01262	0.000458597	1.65422	0.043646	0.425714	0.634614
	Cre12.g510500			chromosome_12:1947276-1953180												8.74241	3.7106	18.9535	2.87987	17.8835	10.4835	13.6363	14.0851	9.27124	4.42984	2.35606	0.00307393	6.58137	0.000458597	1.70587	0.048043	0.968137	2.09291
	Cre09.g389060			chromosome_9:3416428-3422460				DUF563 superfamily								7.79505	3.35846	14.4191	4.99658	7.52564	4.25675	4.36223	4.66592	4.70136	4.75962	2.32102	0.00307393	2.88579	0.000458597	1.76793	0.0218061	0.934913	0.98776
	Cre13.g576466			chromosome_13:1953807-1954294												346.97	202.228	522.024	228.049	490.461	270.671	152.794	171.063	338.146	427.337	1.71574	0.00307393	2.28909	0.000458597	1.81202	0.014392	0.893203	0.791287
	Cre07.g333150			chromosome_7:2979853-2982077												20.3871	11.7166	44.9759	11.0606	44.6403	24.5816	22.3315	25.7398	24.3083	33.7427	1.74002	0.0223511	4.06632	0.000458597	1.816	0.00773763	0.867586	0.720402
	Cre02.g079450			chromosome_2:899920-905352												17.8283	10.5367	8.53129	2.78907	27.0181	11.1801	18.1346	12.7601	10.3596	9.87572	1.69202	0.00307393	3.05883	0.000458597	2.41662	0.00317004	1.4212	1.049
	Cre06.g283900			chromosome_6:5398255-5404557	(M=2) PTHR16007 - EPIDIDYMAL MEMBRANE PROTEIN E9-RELATED		Family of unknown function (DUF716)	DUF716 superfamily								19.1088	12.3133	22.4786	8.93848	45.4086	11.093	16.6373	19.4168	6.81645	2.15629	1.55188	0.0330913	2.51481	0.000458597	4.09345	0.00317004	0.856851	3.16119
	Cre12.g551100			chromosome_12:8152567-8155838	(M=1) PF07172 - Glycine rich protein family		Glycine rich protein family			AT2G44870.1						19.7982	11.1044	41.7387	15.407	40.7248	20.7853	15.6409	23.653	19.771	11.6668	1.78291	0.00561953	2.70907	0.000458597	1.95931	0.00317004	0.661265	1.69464
	Cre09.g396500		HAD3	chromosome_9:1752154-1755928	(M=5) PF08282 - haloacid dehalogenase-like hydrolase		haloacid dehalogenase-like hydrolase	HAD_like superfamily; Cof								19.1591	10.4213	35.8046	8.71353	28.975	16.7797	22.0804	24.3181	17.4442	18.809	1.83846	0.00307393	4.10908	0.000458597	1.72679	0.0274424	0.907982	0.927439
	Cre02.g118200			chromosome_2:6726751-6728822	(M=2) KOG4491 - Predicted membrane protein		Integral membrane protein DUF92	DUF92 superfamily								16.2239	6.46979	18.0251	7.91962	24.6365	10.4956	16.6208	12.4169	20.3188	10.4479	2.50764	0.00307393	2.27601	0.000458597	2.34732	0.00317004	1.33856	1.94477
	Cre02.g093600		TEH3	chromosome_2:2716662-2720215	(M=5) PF03061 - Thioesterase superfamily		Thioesterase superfamily	PaaI_thioesterase; hot_dog superfamily				YBL095W	Mitochondrial organization of gene expression			2.61172	0.929991	19.9974	1.45974	8.01197	2.53562	9.46497	2.48636	1.13202	0.89765	2.80833	0.00307393	13.6993	0.000458597	3.15977	0.00317004	3.80676	1.26109
	Cre04.g215600			chromosome_4:1183564-1187831	(M=1) PTHR10108:SF241 - THIOL METHYLTRANSFERASE, PUTATIVE		Thiopurine S-methyltransferase (TPMT)	AdoMet_MTases superfamily		AT2G43940.1	S-adenosyl-L-methionine-dependent methyltransferases superfamily protein					29.5587	18.7815	47.3602	14.8516	74.5522	19.3098	25.0916	27.002	11.3568	10.8323	1.57382	0.0223511	3.1889	0.000458597	3.86085	0.00317004	0.92925	1.04842
	Cre13.g589450			chromosome_13:3741313-3746284	(M=2) PF08487 - Vault protein inter-alpha-trypsin domain		von Willebrand factor type A domain; Vault protein inter-alpha-trypsin domain	vWFA superfamily; VIT superfamily; marine_srt_targ								11.3778	5.8435	17.4876	4.8895	23.7762	11.7047	5.34485	4.29306	2.26444	1.17007	1.94709	0.00307393	3.57656	0.000458597	2.03134	0.00317004	1.245	1.9353
	Cre11.g482650		EZY3	chromosome_11:3687491-3690606												3.85336	0.709157	9.56708	0.650512	13.1956	7.45324	5.62058	2.11538	2.48024	16.678	5.43372	0.00307393	14.707	0.000458597	1.77045	0.0189368	2.65701	0.148713
	Cre02.g095084			chromosome_2:3296944-3298334												9.78927	4.536	18.2585	3.04122	53.5466	29.3078	6.70883	6.63741	3.36737	8.67814	2.15813	0.036295	6.00368	0.000458597	1.82704	0.014392	1.01076	0.388029
	Cre08.g358535			chromosome_8:121923-123755												11.1199	4.97491	13.2364	4.16757	10.2939	5.61402	2.6723	3.19086	4.40049	5.00238	2.2352	0.00561953	3.17605	0.000458597	1.83361	0.0366112	0.837486	0.879679
	Cre16.g673057			chromosome_16:6742301-6745887												15.097	5.34892	17.0718	3.16968	15.7336	7.70493	9.90423	6.24501	4.44475	17.45	2.82244	0.00307393	5.38597	0.000458597	2.04202	0.00317004	1.58594	0.254713
	Cre12.g497950			chromosome_12:3294028-3296240												15.1304	7.93173	22.2878	8.90306	15.8112	7.54869	10.7793	8.19838	5.41609	5.41993	1.90758	0.00992138	2.50339	0.000458597	2.09456	0.00317004	1.31481	0.999292
	Cre07.g325760			chromosome_7:2013739-2019255												5.74441	0.402466	16.2772	0.256871	15.1629	9.08939	9.19614	3.00276	8.1388	19.9411	14.273	0.00307393	63.3672	0.000458597	1.6682	0.0483851	3.06256	0.408142
	Cre13.g588800			chromosome_13:3660392-3663439												21.6177	13.978	45.8973	17.1767	26.3653	15.1635	2.7123	2.80787	5.86203	9.86235	1.54655	0.046262	2.67207	0.000458597	1.73873	0.0218061	0.965964	0.594385
	Cre06.g298850			chromosome_6:7319550-7325842				DUF4400 superfamily								8.212	4.99624	15.7439	4.57877	17.1909	9.76114	12.8114	12.3683	5.82528	3.13153	1.64364	0.0189289	3.43846	0.000458597	1.76116	0.0258733	1.03583	1.8602
	Cre12.g535400			chromosome_12:6061079-6066935												6.17652	2.87327	10.7715	2.83933	13.927	7.70381	12.9633	14.4435	6.17691	2.6916	2.14965	0.00307393	3.79368	0.000458597	1.80781	0.0129658	0.897518	2.29488
	Cre02.g073600			chromosome_2:70051-72825												12.6884	7.50051	35.6612	3.7866	32.8445	18.047	15.1482	12.2141	16.1622	39.4788	1.69167	0.0472641	9.41774	0.000458597	1.81994	0.0203486	1.24022	0.409389
	Cre07.g321750			chromosome_7:1278083-1281501												12.0418	1.40571	1.21162	0.212229	3.11845	1.32798	2.79139	4.06926	0.543222	41.3188	8.56635	0.00307393	5.70902	0.00404334	2.34827	0.0258733	0.68597	0.0131471
	Cre10.g464200			chromosome_10:6181294-6189780												10.7558	6.59342	10.3443	6.33661	12.5702	6.2865	9.59138	9.2813	7.13897	6.26968	1.63129	0.00799222	1.63247	0.00212198	1.99955	0.00317004	1.03341	1.13865
	Cre11.g477200		IFR1	chromosome_11:2758884-2763754	(M=1) PTHR14194//PTHR14194:SF8 - NITROGEN METABOLIC REGULATION PROTEIN NMR-RELATED // SUBFAMILY NOT NAMED		NmrA-like family	SDR superfamily; NAD_binding_10; PCBER_SDR_a		AT1G75290.1	NAD(P)-binding Rossmann-fold superfamily protein					8.04672	0.791082	2.16793	0.603494	312.731	8.81472	0.516929	0.339481	1.04152	1.48388	10.1718	0.00307393	3.5923	0.00150228	35.4783	0.00317004	1.5227	0.70189
	Cre04.g217930			chromosome_4:489535-496081	(M=1) PTHR21068:SF12 - PREDICTED PROTEIN		Senescence-associated protein	Senescence superfamily		AT4G35985.1	Senescence/dehydration-associated protein-related					8.92856	5.38353	17.7021	6.39862	12.628	6.39535	9.27512	7.89974	5.06666	4.70464	1.6585	0.0170754	2.76655	0.000458597	1.97456	0.00317004	1.1741	1.07695
	Cre08.g372200			chromosome_8:2529267-2530757												164.171	356.736	2137.65	434.022	782.755	363.888	1173.78	17.6849	1840.74	88.9204	0.460203	0.00307393	4.92521	0.000458597	2.15109	0.00317004	66.3719	20.701
	Cre12.g554400			chromosome_12:7660860-7663820												102.216	91.3437	190.304	55.5881	158.448	80.5581	50.3208	47.0272	43.9738	30.5462	1.11903	0.841193	3.42347	0.000458597	1.96688	0.00317004	1.07004	1.43958
	Cre09.g400500			chromosome_9:1074965-1080636				DUF4436 superfamily								13.8758	9.92726	17.1881	6.97552	21.6469	10.5702	3.20194	4.73604	5.20814	6.51529	1.39775	0.208023	2.46406	0.000458597	2.04792	0.00317004	0.67608	0.799372
	Cre11.g467792			chromosome_11:1748115-1751183				AAA_33								27.5504	24.1028	16.3049	3.39965	14.2687	6.49716	7.83324	5.62423	4.04498	21.7467	1.14304	0.803605	4.79605	0.000458597	2.19614	0.00568854	1.39277	0.186004
	Cre05.g241655			chromosome_5:2020307-2048045				PDZ superfamily								18.3069	12.501	50.6061	16.5	32.3884	14.014	20.4177	15.9361	11.6456	14.136	1.46443	0.388596	3.06704	0.000458597	2.31115	0.00317004	1.28122	0.823826
	Cre01.g029700			chromosome_1:4388402-4390175												37.2014	27.0025	899.069	24.3287	153.59	59.9685	967.634	3.40454	1570.56	29.6352	1.3777	0.236262	36.9551	0.000458597	2.56118	0.00317004	284.219	52.9964
	Cre16.g685700			chromosome_16:4903072-4905800												106.865	89.7661	190.081	64.6667	140.658	82.7821	74.8671	60.8	79.0825	145.821	1.19048	0.652914	2.9394	0.000458597	1.69914	0.036109	1.23137	0.542326
	Cre10.g447050			chromosome_10:3812490-3814657												13.8414	9.61518	12.3787	5.87908	20.9648	12.1968	8.00988	5.31529	8.8747	24.4407	1.43954	0.205709	2.10555	0.000458597	1.71888	0.0280747	1.50695	0.363112
	Cre12.g507800			chromosome_12:2289632-2292864					duplication of Cre07.g346850, Cre07.g346900 and Cre07.g346950							2.44249	1.74641	139.072	28.5857	71.2571	41.2396	154.379	32.9779	107.066	6.64307	1.39858	0.594627	4.86509	0.000458597	1.72788	0.0318285	4.68129	16.1169
	Cre01.g016300		CAM3	chromosome_1:2748972-2754294	(M=32) PTHR10891 - EF-HAND CALCIUM-BINDING DOMAIN CONTAINING PROTEIN			EFh superfamily; EF-hand_7								104.735	88.8146	224.007	90.3379	156.062	89.822	76.4394	43.5822	93.1434	82.1567	1.17925	0.684348	2.47966	0.000458597	1.73746	0.0318285	1.75391	1.13373
	Cre01.g054200			chromosome_1:7525877-7527389												20.7061	14.1372	34.5706	10.3339	30.0002	17.1748	7.42394	7.48478	7.96456	13.7587	1.46465	0.128984	3.34536	0.000458597	1.74676	0.02671	0.991872	0.578874
	Cre03.g151600			chromosome_3:1482547-1484413												11.2394	6.07108	25.9187	5.87983	20.2406	11.5073	5.97912	5.0917	7.82921	9.98799	1.8513	0.0537002	4.40807	0.000458597	1.75894	0.0366112	1.17429	0.783862
	Cre05.g241600			chromosome_5:1879574-1881854												45.0026	36.4571	69.362	24.8424	46.8638	26.6156	55.6267	43.042	70.4238	42.1561	1.2344	0.536419	2.79208	0.000458597	1.76076	0.00949967	1.29238	1.67055
	Cre16.g660225			chromosome_16:2393135-2396868												46.0224	45.8078	45.598	20.242	39.4167	22.1587	25.6882	19.4895	22.7425	39.2833	1.00468	0.995439	2.25264	0.000458597	1.77884	0.014392	1.31805	0.578936
	Cre13.g590650			chromosome_13:3930742-3934468				DUF4106; alaS		AT4G28300.2	Protein of unknown function (DUF1421)					46.2409	34.259	64.3049	29.5195	55.3017	30.8936	32.6327	29.2374	28.0537	28.6483	1.34974	0.259087	2.17839	0.000458597	1.79007	0.014392	1.11613	0.979245
	Cre03.g203569			chromosome_3:8630708-8634420					Chlamydomonas / Volvox specific							4.27834	2.86093	34.4398	4.27574	8.57512	4.65302	42.5742	0.783881	18.3876	0.236966	1.49544	0.331916	8.0547	0.000458597	1.84291	0.0280747	54.3121	77.5959
	Cre16.g691600			chromosome_16:675552-678050												8.35396	7.75696	15.9119	8.07546	15.4545	8.0746	2.43821	1.90624	5.65471	6.69378	1.07696	0.92372	1.9704	0.000458597	1.91396	0.011279	1.27907	0.844771
	Cre13.g580000			chromosome_13:2468272-2477724												851.095	615.49	1289.62	859.298	1300.54	576.412	330.59	383.006	295.784	244.416	1.38279	0.287195	1.50078	0.00793864	2.25627	0.00317004	0.863146	1.21017
	Cre12.g500550			chromosome_12:3048595-3053837	(M=4) PTHR13789:SF63 - FLAGELLAR ASSOCIATED PROTEIN		von Willebrand factor type A domain	vWFA superfamily								24.3627	17.7324	37.4114	13.4196	37.4635	21.9665	18.1266	16.6566	17.5406	13.5004	1.37391	0.214077	2.78782	0.000458597	1.70548	0.0290161	1.08825	1.29927
	Cre06.g278205			chromosome_6:4022152-4028005	(M=197) PF00400 - WD domain, G-beta repeat		WD domain, G-beta repeat	WD40 superfamily; COG2319		AT2G16405.1	Transducin/WD40 repeat-like superfamily protein					13.915	9.68547	19.7093	7.41809	19.6545	9.94746	4.01741	4.45685	4.68742	7.17211	1.43669	0.152242	2.65692	0.000458597	1.97583	0.00317004	0.901401	0.653562
	Cre06.g280350			chromosome_6:5031835-5038368	(M=4) KOG0306 - WD40-repeat-containing subunit of the 18S rRNA processing complex		WD domain, G-beta repeat	COG2319; WD40 superfamily								11.2848	8.23493	14.6237	7.71728	17.1041	7.88773	8.80376	5.61827	7.05118	7.949	1.37036	0.265988	1.89493	0.000458597	2.16844	0.00317004	1.56699	0.887052
	Cre07.g328800		NSG13	chromosome_7:2411745-2418961	Protein expressed during nitrogen-starved gametogenesis	Predicted to contain 3 transmembrane helices and 4 Armadillo repeats; expressed exclusively during gametogenesis, at a late stage (PMID: 15459796). Identified by Abe et al. 2004 [PMID: 15459796] as NSG13, a gene expressed during nitrogen-starved gametoge	Armadillo/beta-catenin-like repeat	ARM superfamily								11.5793	10.3238	18.6372	3.96131	28.2326	15.4458	14.9986	10.8162	9.19212	41.9529	1.12161	0.835821	4.70481	0.000458597	1.82785	0.011279	1.38668	0.219106
	Cre07.g353250			chromosome_7:5803021-5805175												36.6766	24.423	52.0629	24.2268	28.0293	14.1676	1.5401	1.49005	13.5606	5.82583	1.50172	0.0660841	2.14898	0.000458597	1.97841	0.00568854	1.03359	2.32767
	Cre12.g535450			chromosome_12:6067065-6069227				conserved_hypothetical_protein								10.229	6.35939	20.4498	7.16518	17.5625	8.66792	12.3507	9.84293	5.42213	5.96649	1.60849	0.148345	2.85405	0.000458597	2.02615	0.00773763	1.25478	0.908764
	Cre09.g390800			chromosome_9:2549534-2551939				HNHc superfamily								9.59318	5.20233	36.6295	5.77477	28.1772	12.1477	9.99476	11.3244	9.63832	2.97446	1.84402	0.0628896	6.34302	0.000458597	2.31955	0.00317004	0.882586	3.24036
	Cre11.g477550			chromosome_11:2830681-2832544												100.913	89.9578	114.219	43.1494	81.3504	30.6125	44.2033	37.405	28.9588	17.9888	1.12178	0.830227	2.64706	0.000458597	2.65742	0.00317004	1.18175	1.60982
	Cre09.g407650			chromosome_9:6520692-6523738												47.1934	41.8566	73.6596	35.6449	49.3537	30.4169	37.165	38.2527	50.626	30.4263	1.1275	0.813877	2.06648	0.000458597	1.62257	0.0493843	0.971565	1.66389
	Cre04.g220633			chromosome_4:2323807-2326101												53.9951	38.0371	91.6788	30.6695	52.3177	31.4761	18.1047	19.2776	16.4232	19.6069	1.41954	0.132823	2.98925	0.000458597	1.66214	0.0366112	0.939157	0.837623
	Cre15.g640900			chromosome_15:269202-273024				PaaI_thioesterase; hot_dog superfamily								12.0666	13.2811	13.6356	6.20496	12.0934	7.12069	5.23984	3.52133	9.01743	17.5293	0.908554	0.874283	2.19753	0.000458597	1.69835	0.0338158	1.48803	0.51442
	Cre05.g236039			chromosome_5:2551493-2555425					some similarity to a Phytophthora protein							13.5584	13.2707	241.99	48.8682	195.686	112.744	552.432	3.50132	461.979	19.0068	1.02168	0.980409	4.95189	0.000458597	1.73567	0.0280747	157.778	24.306
	Cre12.g554450			chromosome_12:7656483-7659960												13.7056	9.12792	32.0136	5.72083	35.7914	20.1542	18.5702	17.0289	13.7009	10.7322	1.5015	0.179825	5.59597	0.000458597	1.77588	0.0301629	1.09051	1.27662
	Cre17.g723750			chromosome_17:3377964-3379931												117.243	103.699	174.251	87.3135	143.087	80.3686	157.039	107.993	63.2751	127.905	1.13061	0.807048	1.99569	0.000458597	1.78038	0.014392	1.45416	0.494704
	Cre01.g042200			chromosome_1:5922721-5923990												564.023	438.485	821.661	402.047	719.79	402.563	290.608	310.337	307.309	307.707	1.2863	0.439079	2.04369	0.000458597	1.78802	0.0229284	0.936427	0.998707
	Cre04.g218350			chromosome_4:1943460-1945104												17.9649	13.5294	38.1076	17.9341	29.3451	16.3435	0.707779	1.10717	13.8103	21.8698	1.32784	0.389746	2.12487	0.000458597	1.79552	0.011279	0.639269	0.631478
	Cre03.g178750			chromosome_3:4816534-4819866												7.51822	5.50267	10.9581	5.31121	11.9897	6.42196	7.721	9.64729	6.1347	12.7443	1.36629	0.374446	2.0632	0.000458597	1.86698	0.0129658	0.800328	0.481368
	Cre02.g086200			chromosome_2:1721852-1724346												7.00266	6.33664	9.73402	4.87881	9.56536	4.94826	1.93287	1.95561	3.61754	5.10776	1.10511	0.887215	1.99516	0.000833666	1.93308	0.00773763	0.988372	0.708244
	Cre01.g034850			chromosome_1:5033790-5040455												13.1692	13.9775	24.884	11.0979	8.71733	4.19071	4.39985	0.48932	10.8111	2.87023	0.942171	0.930788	2.24223	0.000458597	2.08016	0.00317004	8.99176	3.76663
	Cre07.g312650			chromosome_7:77265-79327												7.84176	4.67893	7.7612	3.49925	9.81184	4.90332	4.99386	4.06046	6.41307	11.7366	1.67597	0.0645691	2.21796	0.000458597	2.00106	0.00317004	1.22988	0.546416
	Cre07.g337100			chromosome_7:3642542-3644557												594.131	648.389	748.93	455.548	580.86	289.044	106.521	84.7468	177.596	172.714	0.916319	0.900839	1.64402	0.00118176	2.00959	0.00317004	1.25693	1.02827
	Cre06.g278157			chromosome_6:3761231-3764773	(M=2) PTHR16222 - ADP-RIBOSYLGLYCOHYDROLASE		ADP-ribosylglycohydrolase	ADP_ribosyl_GH superfamily								12.6184	10.1443	22.8057	9.40415	21.5911	12.8045	13.401	9.33321	8.84569	12.67	1.24389	0.563062	2.42507	0.000458597	1.68621	0.0366112	1.43584	0.69816
	Cre12.g521851			chromosome_12:4504412-4506774	(M=3) PF04982 - HPP family		HPP family	HPP superfamily								4.88906	3.73242	8.03815	2.65016	16.383	2.32839	2.78379	2.89152	2.17271	4.46708	1.30989	0.728899	3.03308	0.000458597	7.03619	0.00317004	0.962743	0.486383
	Cre02.g073800			chromosome_2:85095-86940	(M=1) PF07896 - Protein of unknown function (DUF1674)		Protein of unknown function (DUF1674)	DUF1674 superfamily		AT5G67490.1		YBR269C	Succinate DeHydrogenase			13.7532	12.1297	15.0175	6.07739	15.7828	9.40862	8.77952	8.73598	10.7089	13.7451	1.13385	0.834609	2.47104	0.000458597	1.67748	0.0474809	1.00498	0.779107
	Cre16.g650950			chromosome_16:1229260-1231647	(M=1) PF01931 - Protein of unknown function DUF84		Protein of unknown function DUF84	NTPase_I-T superfamily								11.511	9.9819	13.4701	5.83287	14.9581	8.54667	5.6051	4.93333	6.77854	17.0185	1.15319	0.813983	2.30934	0.000458597	1.75017	0.0387012	1.13617	0.398304
	Cre02.g095105			chromosome_2:3396837-3400201	(M=8) PF10184 - Uncharacterized conserved protein (DUF2358)		Uncharacterized conserved protein (DUF2358)	NTF2_like superfamily								27.6925	21.3727	51.7028	20.9707	39.9093	17.3966	10.8993	9.79551	16.1664	22.754	1.29569	0.40006	2.46548	0.000458597	2.29409	0.00317004	1.11268	0.710486
	Cre17.g709450			chromosome_17:1786617-1788243						AT5G18150.1	Methyltransferase-related protein					16.1053	7.59776	23.1129	8.40529	16.8402	15.2195	13.1342	9.02477	34.6786	26.6257	2.11974	0.00307393	2.7498	0.000458597	1.10649	0.792364	1.45535	1.30245
	Cre07.g336800			chromosome_7:3611515-3613640												83.8837	11.2047	184.376	57.4009	36.8766	32.4614	48.3849	11.1921	837.162	254.508	7.48647	0.00307393	3.21208	0.000458597	1.13601	0.730642	4.32313	3.28933
	Cre11.g478100			chromosome_11:2932082-2934444				NTF2_like superfamily; SnoaL_2								27.548	14.8	82.0831	10.0689	50.4448	33.5166	80.318	85.8796	20.5821	10.192	1.86135	0.00307393	8.15214	0.000458597	1.50507	0.113148	0.93524	2.01944
	Cre03.g176150			chromosome_3:4485712-4487523												128.15	40.0812	158.317	23.0326	95.8193	66.1699	20.2923	13.2045	56.3609	33.9294	3.19726	0.00307393	6.87361	0.000458597	1.44808	0.169869	1.53677	1.66112
	Cre16.g676600			chromosome_16:5991431-5994829				MTHFR superfamily	methionine biosynthesis?							16.9498	7.9581	37.1753	8.0383	36.4263	23.9786	16.9326	19.754	9.22948	6.83374	2.12988	0.00307393	4.62477	0.000458597	1.51912	0.108963	0.857173	1.35058
	Cre06.g263700			chromosome_6:1945362-1948808												7.14299	3.55312	11.5684	5.6761	10.5307	12.6857	5.2086	7.4616	10.3657	14.9063	2.01034	0.00307393	2.03809	0.000458597	0.830124	0.56323	0.698054	0.695391
	Cre07.g343050			chromosome_7:4424364-4425551												3.32468	0.813827	10.7913	0.34055	10.9652	11.1306	17.3154	18.5262	1.9491	0.643691	4.08524	0.0120284	31.6879	0.00118176	0.98514	0.975582	0.934644	3.02801
	Cre17.g723400			chromosome_17:3329801-3333249												13.7772	8.12449	21.4375	2.40985	41.1641	36.1405	32.1319	42.742	21.6552	2.59362	1.69576	0.0170754	8.89578	0.000458597	1.139	0.702573	0.751764	8.34941
	Cre12.g552750			chromosome_12:7881806-7884691						AT1G29640.1	Protein of unknown function, DUF584					18.2499	11.8175	23.1986	9.98467	22.5058	19.3178	26.9089	33.3108	20.5811	15.5132	1.54431	0.046262	2.32342	0.000458597	1.16503	0.643616	0.807813	1.32668
	Cre05.g238311			chromosome_5:2965465-2968704												72.6458	45.9591	130.787	17.6726	188.554	151.328	106.165	96.2035	38.9879	56.8756	1.58066	0.0223511	7.40055	0.000458597	1.246	0.490978	1.10355	0.685494
	Cre12.g554350			chromosome_12:7664020-7668392												63.9849	41.882	97.8162	40.4976	67.2446	51.5818	28.0516	21.1181	44.7008	79.6735	1.52774	0.0352928	2.41536	0.000458597	1.30365	0.364522	1.32832	0.56105
	Cre07.g352800			chromosome_7:5717129-5729901						AT1G07910.2	RNAligase					14.5283	9.24751	22.4279	11.3088	26.1873	16.9541	39.3786	41.494	17.0489	4.75463	1.57105	0.0170754	1.98323	0.000458597	1.5446	0.101395	0.949019	3.58575
	Cre12.g500750			chromosome_12:3026416-3028845												73.8487	44.7164	83.67	33.2747	79.0974	49.206	54.7014	54.9105	44.7661	55.6235	1.65149	0.00561953	2.51452	0.000458597	1.60747	0.062111	0.996192	0.804806
	Cre08.g361850			chromosome_8:935438-937613	(M=1) PF05981 - CreA protein		CreA protein	CreA superfamily								112.932	67.6885	226.659	69.3574	200.225	124.402	87.2709	104.155	77.0713	65.0151	1.66841	0.00561953	3.26799	0.000458597	1.6095	0.0627661	0.837894	1.18544
	Cre03.g174350		PWR2	chromosome_3:4259914-4263606	Predicted PWR protein	PWR motif protein; belongs to a family of 4 genes with no clear homologues in other organisms, except for a similarity with DUF506 proteins (plant-specific, unknown function). The family name comes from the perfectly conserved PWR motif shared between the	Protein of unknown function (DUF506)	DUF506 superfamily								11.115	5.70388	13.2285	6.36926	12.2744	10.1144	9.07775	10.3371	31.1121	16.2259	1.94867	0.00307393	2.07693	0.000458597	1.21356	0.546376	0.878172	1.91743
	Cre02.g089500			chromosome_2:2166901-2169985				DUF4551 superfamily								62.5105	32.0104	40.6979	34.3907	49.6416	41.9337	5.82548	5.8831	63.5799	9.02902	1.95282	0.00307393	1.1834	0.35257	1.18381	0.603154	0.990206	7.04173
	Cre07.g321800			chromosome_7:1281701-1283531												12.3539	1.08319	0.202468	0.10139	0.93305	0.46278	1.3244	2.98208	0.609276	41.0727	11.4051	0.00307393	1.99692	1	2.01618	0.297435	0.44412	0.0148341
	Cre17.g739000			chromosome_17:5720288-5725133						AT1G13990.1						17.6967	22.5045	18.0293	13.7477	20.6891	8.05198	5.52483	2.6944	7.21419	9.02006	0.786363	0.443498	1.31144	0.124234	2.56944	0.00317004	2.05049	0.799794
	Cre13.g570801			chromosome_13:1273206-1274442												1.60268	0.727153	5.4864	0.13978	9.55789	3.60248	1.68458	1.71215	0.645816	3.2411	2.20405	0.269457	39.2503	0.0551045	2.65314	0.00317004	0.983897	0.199258
	Cre08.g379400			chromosome_8:4053685-4060073				COG4372								13.5022	13.8997	11.9148	11.6465	13.298	6.29526	5.86626	4.568	6.32758	3.26469	0.971402	0.970451	1.02304	0.917138	2.11238	0.00317004	1.28421	1.93819
	Cre03.g166500			chromosome_3:3335288-3340565												13.1817	14.786	9.39398	9.07171	10.4489	4.51805	3.67424	2.79118	5.59364	2.56152	0.891499	0.826569	1.03552	0.879403	2.3127	0.00317004	1.31638	2.18372

## Sheet: down
CRR1 Targets			CRR1 and CRR1Δcys	CRR1Δcys
Ni-responsive in CRR1 only			CRR1 and crr1	no shading, qvalue >0.05 in all strains										FPKM										Fold change
Ni-responsive in all strains			crr1					MBH = mutual best hit based on BLAST search						Ni						Cu
														crr1		CRR1		cys		4532		CRR1	crr1	Ni						Cu
gene	symbol	aliases	location	defline	description	PFAM	CDD	Arabidopsis MBH	Description	yeast MBH	Description			plus	minus	plus	minus	plus	minus	minus	plus	minus	minus	crr1	q value	CRR1	q value	cys	q value	4532	CRR1/crr1
Cre09.g389050		CNX5	chromosome_9:2774440-2788457	Molybdopterin cofactor sulfurase family protein	Pfam03473, MOSC domain; COG3217		myxo_disulf_rpt superfamily							9.15258	7.35494	2.80418	9.67469	12.0874	17.7971	1.47719	1.61249	17.9908	0.614409	1.24441	0.514728	0.289847	0.000458597	0.679178	0.1574	0.916093	29.2815
Cre06.g280800			chromosome_6:5090405-5093137	(M=1) PTHR15081 - NUCLEAR AUTOANTIGENIC SPERM PROTEIN (NASP)-RELATED										8.51783	9.35633	7.30965	14.9991	6.25223	8.8489	4.15202	5.49245	6.58939	6.73568	0.910382	0.891968	0.487339	0.000458597	0.706554	0.251806	0.75595	0.978281
Cre11.g482700			chromosome_11:3692850-3696796				HMG-box superfamily							11.0433	11.5375	8.56008	17.2848	7.72773	10.7542	7.43167	7.95134	10.5466	9.43157	0.957166	0.954887	0.495237	0.000458597	0.718578	0.246862	0.934644	1.11822
Cre12.g497350	PPR13		chromosome_12:3351919-3363829					AT3G04260.1	plastid transcriptionally active 3					13.3424	13.4003	9.24058	18.231	9.28053	12.0421	30.2844	32.0503	18.7144	7.11762	0.995679	0.995439	0.506861	0.000458597	0.770674	0.378399	0.944902	2.62931
Cre06.g258800		GP2	chromosome_6:1382764-1388562	Hydroxyproline-rich glycoprotein component of the outer cell wall	Extracellular matrix protein (cell wall protein) GP2; contains (hydroxy)proline-rich (HR) domains. Antibody against deglycosylated GP2 was used successfully to screen for a cDNA clone in a gt11 expression library [PMID: 1699225; M58497]. Independently seq									421.811	451.662	179.946	376.655	363.958	455.192	408.881	446.809	451.321	602.42	0.933909	0.93856	0.477748	0.000458597	0.79957	0.538043	0.915114	0.74918
Cre01.g027575			chromosome_1:4171667-4172262											11.1818	8.45759	5.40614	20.7972	13.3757	13.1387	32.485	22.7612	31.6971	15.4006	1.3221	0.708624	0.259946	0.000458597	1.01804	0.975695	1.42721	2.05817
Cre16.g653450			chromosome_16:1548135-1551168	(M=1) PF03114 - BAR domain		BAR domain	BAR superfamily	AT4G25430.1						15.7261	12.5141	7.75494	16.1615	11.1203	15.0946	4.44753	6.2035	9.73156	20.1373	1.25667	0.518262	0.47984	0.000458597	0.736707	0.294209	0.716939	0.48326
Cre16.g659600			chromosome_16:2333478-2342995	(M=1) PTHR14428 - NUCLEOLAR COMPLEX PROTEIN 3		CBF/Mak21 family	CBF superfamily	AT1G79150.1	binding	YLR002C	Subunit of a nuclear complex with Noc2p and pre-replicative complexes; the Noc2p-Noc3p complex binds to 66S ribosomal precursors to mediate their maturation and intranuclear transport; binds to chromatin at active replication origins, and is required for pre-RC formation and maintenance during DNA replication licensing			6.45361	6.96762	4.58599	10.6623	4.75575	7.53675	20.4516	23.5165	10.4069	5.28294	0.926229	0.910219	0.430113	0.000458597	0.631008	0.0740881	0.86967	1.96991
Cre01.g015250		POLD1	chromosome_1:2620924-2630702	DNA polymerase delta, catalytic subunit	Homologous to eukaryotic DNA polymerase delta, catalytic subunit. Involved in DNA replication; a class B polymerase. See Burgers et al. (2001) (PMID: 11579108). Previously annotated as POLD1	DNA polymerase family B,DNA polymerase family B, exonuclease domain	POLBc superfamily,DnaQ_like_exo superfamily,zf-C4pol superfamily	AT5G63960.1	DNA binding;nucleotide binding;nucleic acid binding;DNA-directed DNA polymerases;DNA-directed DNA polymerases	YDL102W	Catalytic subunit of DNA polymerase delta; required for chromosomal DNA replication during mitosis and meiosis, intragenic recombination, repair of double strand DNA breaks, and DNA replication during nucleotide excision repair (NER)			6.52148	8.30841	6.53222	13.4193	5.31021	7.63993	4.49341	3.76875	5.75146	5.40882	0.784925	0.485592	0.486778	0.000458597	0.69506	0.166713	1.19228	1.06335
Cre04.g223100		CAH1	chromosome_4:2662124-2666375	Carbonic anhydrase	Carbonate dehydratase 1 in Chlamydomonas reinhardtii, also known as CA1; gi:115447; Carbonic anhydrase 1 precursor (Carbonate dehydratase 1) (CA1); alpha type - Carbonic anhydrase 1 localized in the periplasmic space and low-CO2 inducible gene regulated b	Eukaryotic-type carbonic anhydrase,MutS domain I,MutS domain V,MutS domain III,MutS domain II	alpha_CA superfamily							496.944	462.354	7.57204	17.6632	364.438	366.98	327.014	446.334	1700.05	2720.18	1.07481	0.927337	0.42869	0.000458597	0.993073	0.990839	0.732667	0.624977
Cre09.g394200	FAP102		chromosome_9:2043434-2049685	Flagellar Associated Protein	Flagellar Associated Protein, found in the flagellar proteome [PMID: 15998802]	Fasciclin domain								498.212	535.075	164.575	437.741	389.14	509.3	369.502	453.013	482.109	652.677	0.931107	0.93639	0.375964	0.000458597	0.764068	0.436971	0.815654	0.738664
Cre01.g009250		TOP2	chromosome_1:1714085-1725107	DNA topoisomerase II	DNA topoisomerase II. Similar to DNA topoisomerase II in Arabidopsis, TOP2 or AT3G23890.	Histidine kinase-, DNA gyrase B-, and HSP90-like ATPase,DNA gyrase B,DNA gyrase/topoisomerase IV, subunit A	TOP4c superfamily,TOPRIM superfamily,TopoII_MutL_Trans superfamily,HATPase_c superfamily	AT3G23890.1	topoisomerase II	YNL088W	Topoisomerase II; relieves torsional strain in DNA by cleaving and re-sealing phosphodiester backbone of both positively and negatively supercoiled DNA; cleaves complementary strands; localizes to axial cores in meiosis; required for replication slow zone (RSZ) breakage following Mec1p inactivation; human homolog TOP2A implicated in cancers, and can complement yeast null mutant			8.95676	7.78341	6.99837	14.4563	5.76715	7.71131	3.11415	3.39369	6.94324	3.73314	1.15075	0.766983	0.484105	0.000458597	0.747882	0.310772	0.917629	1.85989
Cre16.g656700		KIN14A-2	chromosome_16:1988793-1994706	(M=1) K10405 - kinesin family member C1		Kinesin motor domain	Motor_domain superfamily,BAR superfamily	AT4G05190.1	kinesin 5	YPR141C	Minus-end-directed microtubule motor; functions in mitosis and meiosis, localizes to the spindle pole body and localization is dependent on functional Cik1p, required for nuclear fusion during mating; potential Cdc28p substrate			7.3073	8.02767	5.65179	13.1897	6.00543	7.7997	2.69573	3.50181	5.30582	5.2722	0.910264	0.883361	0.4285	0.000458597	0.769957	0.39235	0.76981	1.00638
Cre07.g316850	MCM4		chromosome_7:602580-610942	Minichromosome maintenance protein	Homologous to MCM4/CDC21 DNA replication protein	MCM2/3/5 family	MCM_N superfamily,P-loop_NTPase superfamily	AT2G16440.1	Minichromosome maintenance (MCM2/3/5) family protein	YPR019W	Essential helicase component of heterohexameric MCM2-7 complexes; MCM2-7 complexes bind pre-replication complexes on DNA and melt DNA prior to replication; forms an Mcm4p-6p-7p subcomplex; shows nuclear accumulation in G1; homolog of S. pombe Cdc21p			11.5699	11.1347	8.21071	20.4188	7.66843	12.0504	4.81176	6.97836	6.59388	10.3073	1.03909	0.961029	0.402115	0.000458597	0.636363	0.082754	0.689526	0.639729
Cre03.g178650	MCM6		chromosome_3:4802238-4808304	Minichromosome maintenance protein	Homology to MCM6 DNA replication protein	MCM2/3/5 family	MCM_N superfamily,P-loop_NTPase superfamily	AT5G44635.1	minichromosome maintenance (MCM2/3/5) family protein	YGL201C	Protein involved in DNA replication; component of the Mcm2-7 hexameric helicase complex that binds chromatin as a part of the pre-replicative complex; forms a subcomplex with Mcm4p and Mcm7p			13.8848	14.4548	12.7054	25.7207	10.4686	15.9644	8.0431	7.80269	9.58824	12.0332	0.960567	0.959191	0.493976	0.000458597	0.655747	0.103394	1.03081	0.796815
Cre06.g295700	MCM3		chromosome_6:6887880-6893656	Minichromosome maintenance protein	Homologous to MCM3 DNA replication protein	MCM2/3/5 family	P-loop_NTPase superfamily,MCM_N superfamily	AT5G46280.1	Minichromosome maintenance (MCM2/3/5) family protein	YEL032W	Protein involved in DNA replication; component of the Mcm2-7 hexameric helicase complex that binds chromatin as a part of the pre-replicative complex			15.8016	17.5018	13.4038	26.5375	10.7774	14.5334	4.67103	6.81687	10.17	11.2687	0.902856	0.851835	0.505089	0.000458597	0.741561	0.297749	0.685216	0.9025
Cre07.g338000	MCM2		chromosome_7:3740542-3749718	Minichromosome maintenance protein	Homologous to MCM2 DNA replication protein	Mini-chromosome maintenance protein 2,MCM2/3/5 family	MCM_N superfamily,MCM2_N superfamily,P-loop_NTPase superfamily	AT1G44900.1	minichromosome maintenance (MCM2/3/5) family protein	YBL023C	Protein involved in DNA replication; component of the Mcm2-7 hexameric helicase complex that binds chromatin as a part of the pre-replicative complex; relative distribution to the nucleus increases upon DNA replication stress			19.1111	19.7742	15.9116	34.7821	13.8998	21.4935	9.43786	11.3923	12.397	12.652	0.966466	0.966518	0.457465	0.000458597	0.646698	0.0919489	0.828442	0.979845
Cre01.g030150			chromosome_1:4442169-4447442	(M=1) KOG2545 - Conserved membrane protein		Mini-chromosome maintenance replisome factor	MCM_bind superfamily,Racemase_4 superfamily	AT2G40550.1	E2F target gene 1					4.45614	6.57497	6.68442	14.9999	4.32191	7.05042	3.08208	4.04818	4.01687	8.1192	0.677743	0.18304	0.445631	0.000458597	0.613	0.074631	0.76135	0.494737
Cre05.g235750		MSH6	chromosome_5:2501627-2514693	DNA mismatch repair protein, MutS homolog	DNA mismatch repair protein, MutS homolog. Forms a complex with MutL (see MLH genes). Reviewed by Vlcek et al. 2008 [PMID:17992532] as protein ID 120228, homolog of yeast and human MSH6. Acclimation to changing CO2 concentrations and light intensities	MutS domain I	P-loop_NTPase superfamily,MutS_III superfamily,MutS_I superfamily,MutS_II superfamily,CobT superfamily	AT4G02070.1	MUTS homolog 6	YOL090W	Protein that binds to DNA mismatches; forms heterodimers with Msh3p and Msh6p that bind to DNA mismatches to initiate the mismatch repair process; contains a Walker ATP-binding motif required for repair activity and involved in interstrand cross-link repair; Msh2p-Msh6p binds to and hydrolyzes ATP			8.37115	9.08266	6.09217	14.15	5.71103	7.90397	4.82912	5.05842	5.57119	4.95328	0.921663	0.894721	0.430542	0.000458597	0.722552	0.243398	0.95467	1.12475
Cre17.g696700		PHC22	chromosome_17:66833-69000	Cell wall protein pherophorin-C22	Pherophorin-C22 (PHC22) [PMID: 16367971]; partial sequence similar to extracellular matrix protein (cell wall protein) pherophorin-C4 [Genbank entry DQ196110], which belongs to the large pherophorin-family, a family of glycoproteins with a central hydroxy	Pherophorin	DUF3707 superfamily							43.364	57.062	13.0777	34.1311	33.467	54.0248	11.5656	15.3314	34.4637	44.6424	0.759945	0.329041	0.383161	0.000458597	0.619475	0.0537745	0.754373	0.771995
Cre05.g238687			chromosome_5:3039141-3044935	(M=71) PF12499 - Pherophorin		Pherophorin	DUF3707 superfamily							108.966	147.462	60.1054	129.106	64.2254	99.4563	105.883	118.049	71.6267	19.9486	0.738943	0.32101	0.465551	0.000458597	0.645765	0.113148	0.896941	3.59056
Cre14.g620702			chromosome_14:1873368-1877024	(M=71) PF12499 - Pherophorin		Pherophorin	DUF3707 superfamily							137.813	178.402	62.0579	124.762	103.901	152.702	236.699	268.785	65.6762	63.2133	0.772486	0.438951	0.49741	0.000458597	0.680417	0.171263	0.880626	1.03896
Cre12.g558300			chromosome_12:7230138-7234894	(M=64) PTHR23257:SF99 - TGF-BETA-ACTIVATED KINASE 1		Protein kinase domain,Protein tyrosine kinase	PKc_like superfamily							9.63258	10.5086	6.11064	14.8378	5.10237	5.50868	7.46164	6.68505	7.80761	3.46712	0.916638	0.887216	0.411829	0.000458597	0.926242	0.855723	1.11617	2.2519
Cre14.g622850		RAD51A	chromosome_14:2208585-2212169	DNA recombination protein	Homologous to RecA and eukaryotic Rad51. Previously annotated as RAD51; homolog of human Rad51A protein [PMID: 17992532]	Rad51	P-loop_NTPase superfamily,ENDO3c superfamily	AT5G20850.1	RAS associated with diabetes protein 51	YER095W	Strand exchange protein; forms a helical filament with DNA that searches for homology; involved in the recombinational repair of double-strand breaks in DNA during vegetative growth and meiosis; homolog of Dmc1p and bacterial RecA protein			7.63149	6.52027	6.32284	12.7839	6.17198	8.22022	2.8804	3.84879	6.92623	5.88185	1.17043	0.799235	0.494594	0.000458597	0.750829	0.375411	0.748391	1.17756
Cre10.g440200		SMC5B	chromosome_10:2909321-2918297	Structural Maintenance of Chromosomes protein	Subunit of the condensin complex, which reorganizes chromosomes during cell division; coiled-coil protein of the SMC family involved in chromosome condensation and segregation. This is one of two SMC5 models near each other on scaffold 10.	RecF/RecN/SMC N terminal domain	P-loop_NTPase superfamily			YOL034W	Component of the SMC5-SMC6 complex; this complex plays a key role in the removal of X-shaped DNA structures that arise between sister chromatids during DNA replication and repair; binds single-stranded DNA and has ATPase activity; S. pombe homolog forms a heterodimer with S. pombe Rad18p that is involved in DNA repair			5.27189	5.85954	5.38042	10.5911	4.53032	6.4145	1.60126	1.80996	6.43372	5.36836	0.899711	0.863916	0.508013	0.000458597	0.706262	0.213569	0.884694	1.19845
Cre17.g701350			chromosome_17:754758-758870	(M=1) KOG2299 - Ribonuclease HI		Ribonuclease HII	RNase_H_like superfamily	AT2G25100.1	Polynucleotidyl transferase, ribonuclease H-like superfamily protein	YNL072W	Ribonuclease H2 catalytic subunit; removes RNA primers during Okazaki fragment synthesis and errant ribonucleotides misincorporated during DNA replication; role in ribonucleotide excision repair; homolog of RNAse HI; related to human AGS4 which causes Aicardi-Goutieres syndrome			4.761	4.66883	3.54436	10.2291	3.98572	5.39759	1.63345	2.34232	4.49538	4.2227	1.01974	0.988843	0.346498	0.000458597	0.738426	0.411932	0.697364	1.06457
Cre12.g510050	CTH1	CTH1B	chromosome_12:2024725-2027967	Copper target 1 protein	Copper target homolog 1 protein, chloroplast precursor, functional variant produced under copper and/or oxygen sufficient conditions [GI:15650866; PMID: 11910013; PMID: 14673103]; also named CHL27B; Mg-protoporphyrin IX monomethyl ester (oxidative) cyclas	Rubrerythrin	Ferritin_like superfamily	AT3G56940.1	dicarboxylate diiron protein, putative (Crd1)					233.554	207.867	69.9447	137.345	250.54	233.972	55.8861	265.919	68.3792	373.709	1.12357	0.847883	0.509263	0.000458597	1.07081	0.870221	0.210162	0.182974
Cre17.g746247			chromosome_17:6979763-6989749	(M=1) PTHR22884:SF18 - ENHANCER OF ZESTE, EZH		SET domain	SET superfamily,TCR superfamily							5.24927	6.93563	5.16188	10.1943	3.84558	6.18342	7.40223	6.70681	7.31715	5.25108	0.756856	0.427276	0.50635	0.000458597	0.621918	0.0858495	1.10369	1.39346
Cre09.g397623			chromosome_9:4859323-4863310											4.87828	8.26053	0.81819	8.26917	5.35821	10.954	1.31456	3.37533	1.43218	26.0306	0.590553	0.0428519	0.0989446	0.000458597	0.489156	0.00317004	0.389461	0.0550191
Cre12.g488450		VSP3	chromosome_12:1359263-1361787	Extracellular matrix protein	Extracellular matrix protein (vegetative cell wall protein) similar to ISG (Volvox carteri) [PMID: 1600938], both are glycoproteins with a hydroxyproline-rich (HR) domain. [PMID: 8000007. ISG Genbank entry X65165; VSP3, L29029; C. incerta ortholog, AY7950		DUF1355 superfamily							2.51816	11.8763	2.8933	10.5229	7.65723	20.3968	4.87489	3.25636	18.6574	2.96866	0.212032	0.00307393	0.274953	0.000458597	0.375413	0.00317004	1.49704	6.28479
Cre08.g359250			chromosome_8:538340-541822											14.0783	27.2834	4.27255	12.347	8.00276	14.4284	4.47104	2.60358	21.8082	21.4998	0.516002	0.00307393	0.34604	0.000458597	0.554653	0.0189368	1.71727	1.01434
Cre16.g693600	FAP137	ISG-C4	chromosome_16:387522-392944	Hydroxyproline-rich cell wall protein	Putative extracellular matrix protein (cell wall protein); similar to Volvox ISG [PMID: 1600938]) and Chlamydomonas VSP-3 [PMID: 8000007], two glycoproteins with a hydroxyproline-rich (HR) domain; ISG Genbank entry X65165; VSP-3 Genbank entry AY795084. Al									47.5837	88.6329	32.8969	81.2624	43.3302	75.4374	63.3802	61.9111	73.3623	53.4867	0.536863	0.00307393	0.404823	0.000458597	0.574386	0.0203486	1.02373	1.3716
Cre13.g585000			chromosome_13:3124718-3130345				SBP56 superfamily							9.99609	20.0804	1.31632	3.05693	1.15012	2.33918	1.02343	2.10175	9.06828	0.793767	0.497803	0.00307393	0.430602	0.000458597	0.491677	0.0392509	0.486942	11.4244
Cre12.g487700			chromosome_12:1452618-1459380											6.88109	10.8227	6.28094	14.5254	8.73107	16.6041	23.3706	25.7155	12.3067	17.5109	0.635802	0.0315022	0.432411	0.000458597	0.525838	0.00317004	0.908814	0.702802
Cre08.g363100			chromosome_8:1184862-1197841	(M=2) PTHR23301 - CHITIN BINDING PERITROPHIN-A		Chitin binding Peritrophin-A domain	CBM_14 superfamily			YDR249C	Putative protein of unknown function			4.46727	10.4074	1.08152	5.12902	1.11743	2.43898	0.327686	0.307429	1.45017	0.681474	0.42924	0.00307393	0.210863	0.000458597	0.458155	0.00317004	1.06589	2.12799
Cre03.g144564		MMP13	chromosome_3:290353-295831	Matrix metalloproteinase	Matrix metalloproteinase belonging to the M11 peptidase family	Gametolysin peptidase M11	Peptidase_M7 superfamily							9.86349	33.3732	4.33768	25.8473	8.18425	23.262	19.9439	19.0499	15.4285	11.3327	0.295551	0.00307393	0.167819	0.000458597	0.351829	0.00317004	1.04693	1.36141
Cre24.g755997	FAP150	PHC18	scaffold_24:118245-122121	Cell wall protein pherophorin-C18	Pherophorin-C18 (PHC18) [PMID: 16367971]; partial sequence similar to extracellular matrix protein (cell wall protein) pherophorin-C5 [Genbank entry DQ196111], which belongs to the large pherophorin-family, a family of glycoproteins with a central hydroxy	Pherophorin	DUF3707 superfamily							41.0665	130.455	30.1285	222.896	21.6963	88.8054	85.9269	165.852	406.019	1.70948	0.314794	0.00307393	0.135168	0.000458597	0.244313	0.00317004	0.518094	237.51
Cre05.g238650		PHC5	chromosome_5:3034209-3039095	Cell wall protein pherophorin-C5	Pherophorin-C5 (PHC5) [PMID: 16367971; Genbank entry DQ196111]; extracellular matrix protein (cell wall protein); belongs to the large pherophorin-family, a family of glycoproteins with a central hydroxyproline-rich (HR) domain. (partial sequence, codes o	Pherophorin	DUF3707 superfamily							49.9333	178.254	20.7705	116.797	33.4669	85.354	42.9349	49.0895	76.3039	18.6963	0.280124	0.00307393	0.177834	0.000458597	0.392095	0.00317004	0.874625	4.08123
Cre17.g717900		PHC1	chromosome_17:2693360-2696479	Cell wall protein pherophorin-C1	Pherophorin-C1 (PHC1) [PMID: 16367971; Genbank entry DQ196107]; extracellular matrix protein (cell wall protein); belongs to the large pherophorin-family, a family of glycoproteins with a central hydroxyproline-rich (HR) domain. (partial sequence; due to	Pherophorin	DUF3707 superfamily							53.8064	173.166	20.8538	95.3824	61.3436	152.483	100.819	121.521	116.788	122.969	0.310722	0.00307393	0.218634	0.000458597	0.402298	0.00317004	0.829643	0.949735
Cre02.g094450		PHC21	chromosome_2:2808945-2813363	Cell wall protein pherophorin-C21	Pherophorin-C21 (PHC21) [PMID: 16367971]; partial sequence similar to extracellular matrix protein (cell wall protein) pherophorin-C5 [Genbank entry DQ196111], which belongs to the large pherophorin-family, a family of glycoproteins with a central hydroxy	Pherophorin	DUF3707 superfamily							30.9214	79.2197	20.5617	49.3016	41.0412	79.7973	66.449	68.5836	65.4402	35.0132	0.390325	0.00307393	0.417059	0.000458597	0.514318	0.00773763	0.968876	1.86902
Cre02.g095095		PHC12	chromosome_2:3345374-3351647	Cell wall protein pherophorin-C12	Pherophorin-C12 (PHC12) [PMID: 16367971]; very similar to extracellular matrix protein (cell wall protein) pherophorin-C6 [Genbank entry DQ196112], which belongs to the large pherophorin-family, a family of glycoproteins with a central hydroxyproline-rich	Pherophorin	DUF3707 superfamily							18.584	34.2096	8.66884	17.6145	12.5669	23.6521	32.3684	40.6597	29.032	35.488	0.543239	0.00307393	0.492142	0.000458597	0.531323	0.00317004	0.796081	0.818079
Cre12.g546550	FEA1		chromosome_12:8671305-8675189	Fe-assimilating protein	High-CO2 inducible, iron-deficiency inducible, periplasmic protein. Changes in expression with light intensity were studied by Long and Merchant 2008 [PMID: 19067961]. Cis-acting regulatory elements were characterized by Fei et al. 2009 [PMID: 19351705].	Low iron-inducible periplasmic protein	Fea1 superfamily							712.41	155.352	695.01	1704.52	438.228	1237.64	179.907	99.1039	2316	1389.89	4.58578	0.00307393	0.407745	0.000458597	0.354084	0.00317004	1.81534	1.66632
Cre12.g546500		TEF22	chromosome_12:8675407-8681279	Predicted protein	Protein with unknown function, mitochondrial localization assumed; present in thylakoid-enriched fraction based on mass spectrometric peptide identification [PMID: 17078018]	DOMON domain,Eukaryotic cytochrome b561	Cyt_b561 superfamily,DOMON_like superfamily	AT3G07570.1	Cytochrome b561/ferric reductase transmembrane with DOMON related domain					92.9014	37.7484	90.0081	132.823	36.1321	94.7945	20.9901	19.7463	324.443	108.677	2.46107	0.00307393	0.677654	0.0140069	0.381162	0.00317004	1.06299	2.98539
Cre12.g532314			chromosome_12:5644355-5646278											5.82417	7.15277	6.52345	12.3218	4.34531	9.98067	25.9308	29.4924	6.99767	15.1864	0.814254	0.763339	0.529423	0.000833666	0.435373	0.00568854	0.879237	0.460785
Cre17.g714800		ISG-C3	chromosome_17:2360265-2362883	Hydroxyproline-rich cell wall protein	Similar to Chlamydomonas incerta hydroxyproline-rich glycoprotein VSP-3. Putative extracellular matrix protein (cell wall protein)									0	0	2.51077	6.54757	6.71474	13.495	6.26656	6.80139	12.5763	0.0511111	n.d.	1	0.383466	0.000458597	0.497572	0.00317004	0.921365	246.058
Cre03.g154400		MFT15	chromosome_3:1811941-1817634	(M=33) PTHR24003 - MAJOR FACILITATOR SUPERFAMILY DOMAIN-CONTAINING PROTEIN-RELATED			MFS superfamily							8.32252	11.1142	6.60582	9.48282	5.20744	10.4496	15.9663	20.8903	11.8032	7.93191	0.748819	0.310445	0.696609	0.0380127	0.498339	0.00317004	0.764293	1.48807
Cre09.g393600			chromosome_9:2121798-2124595	(M=1) K10735 - GINS complex subunit 4		GINS complex protein	GINS_A superfamily,Pox_G7 superfamily	AT5G49010.1	DNA replication protein-related	YDR489W	Subunit of the GINS complex (Sld5p, Psf1p, Psf2p, Psf3p); complex is localized to DNA replication origins and implicated in assembly of the DNA replication machinery			8.92879	9.84191	7.21232	15.1169	5.36757	9.54604	3.59516	3.79453	4.90992	5.7484	0.907221	0.89634	0.477103	0.000458597	0.562282	0.041582	0.947459	0.854137
Cre06.g288100			chromosome_6:5879500-5883172	(M=2) PTHR12829 - N6-ADENOSINE-METHYLTRANSFERASE		MT-A70	MT-A70 superfamily							5.10252	4.98664	3.77403	10.0609	3.5925	6.28199	5.78601	6.17995	6.34674	8.36794	1.02324	0.983809	0.375119	0.000458597	0.571873	0.02671	0.936255	0.758459
Cre02.g118600	FTSZ1	FTSZ3	chromosome_2:6763463-6767532	Plastid division protein	FtsZ1 plastid division protein, identical to GI:20372934; alternative splicing uses splice sites internal to exons 5 and 9 (20021010.1409.1). Transcription levels were characterized by Adams et al. 2008 [PMID: 18270733]; also see [PMID: 12598582] and [PM	Tubulin/FtsZ family, GTPase domain,FtsZ family, C-terminal domain	Tubulin_FtsZ_Cetz-like superfamily	AT5G55280.1	homolog of bacterial cytokinesis Z-ring protein FTSZ 1-1					31.6211	34.4224	21.972	50.2497	22.5699	38.8307	11.8887	13.3729	17.8594	24.0786	0.91862	0.883361	0.437256	0.000458597	0.581239	0.0290161	0.889014	0.741713
Cre18.g749547			scaffold_18:189434-201670	(M=1) PF07510 - Protein of unknown function (DUF1524)		Protein of unknown function (DUF1524),Protein of unknown function DUF262	HNHc superfamily,DUF262 superfamily							26.227	52.0916	20.9411	38.5348	15.38	24.8183	5.49499	9.54496	36.746	4.00544	0.503478	0.00307393	0.543433	0.000458597	0.619704	0.07204	0.575695	9.17402
Cre11.g467615			chromosome_11:631155-633837	(M=6) PF07645 - Calcium-binding EGF domain		Calcium-binding EGF domain								6.24494	19.24	5.25188	18.9093	11.5298	18.506	6.54619	4.67289	7.28333	1.332	0.324581	0.00307393	0.277741	0.000458597	0.62303	0.0988906	1.40089	5.46797
Cre10.g458850			chromosome_10:5467566-5472015											5.17115	10.8375	2.26292	8.45928	16.2723	25.2538	47.4683	38.3169	35.3047	10.6321	0.477153	0.00307393	0.267507	0.000458597	0.644351	0.0814226	1.23883	3.32058
Cre05.g241350			chromosome_5:3432072-3449959	(M=11) KOG0065 - Pleiotropic drug resistance proteins (PDR1-15), ABC superfamily		ABC-2 type transporter,ABC transporter	P-loop_NTPase superfamily,ABC2_membrane superfamily,Synuclein superfamily							7.22212	12.8045	4.29937	10.1656	5.93282	9.12197	6.19711	5.46088	6.89442	3.40511	0.56403	0.00307393	0.422933	0.000458597	0.650388	0.094871	1.13482	2.02473
Cre17.g717950			chromosome_17:2698090-2702210	(M=71) PF12499 - Pherophorin		Pherophorin	DUF3707 superfamily							28.5911	78.7336	22.7292	46.2436	33.6836	51.474	8.73279	11.5804	23.7867	9.2906	0.363137	0.00307393	0.49151	0.000458597	0.654381	0.102105	0.754101	2.5603
Cre02.g077800			chromosome_2:599755-604266											140.341	233.698	117.849	249.066	134.782	204.657	133.233	153.791	151.817	50.1476	0.600523	0.0170754	0.473164	0.000458597	0.658575	0.127992	0.866325	3.0274
Cre09.g390726			chromosome_9:3674741-3676630											39.0883	78.8873	27.6941	46.2273	26.4868	39.7295	5.48904	8.05836	7.13098	1.71248	0.495495	0.00307393	0.599085	0.00180338	0.666678	0.124833	0.681161	4.16412
Cre02.g077850	FAP212		chromosome_2:608123-612186	Flagellar Associated Protein	Flagellar Associated Protein, found in the flagellar proteome [PMID: 15998802]									61.2319	102.227	29.4982	72.8027	47.3938	71.051	82.5402	79.5593	51.8137	83.776	0.59898	0.0120284	0.40518	0.000458597	0.667039	0.137325	1.03747	0.618479
Cre12.g489300			chromosome_12:1250654-1263419											12.0236	21.9803	9.8769	20.5846	11.5014	14.4828	0.694947	0.735574	3.46301	15.1866	0.547017	0.00307393	0.47982	0.000458597	0.794142	0.452219	0.944768	0.228031
Cre06.g283850			chromosome_6:5392815-5397500											7.38743	14.8935	3.11494	5.35206	4.75401	5.5841	9.32527	6.23385	2.45961	4.09238	0.496017	0.00307393	0.582008	0.00664072	0.851348	0.654848	1.49591	0.601022
Cre09.g410332			chromosome_9:6917619-6927259	(M=64) PTHR23257:SF99 - TGF-BETA-ACTIVATED KINASE 1		Protein kinase domain	PKc_like superfamily							9.25745	19.0832	2.97522	4.52826	8.98469	9.11219	0.140507	0.192662	10.8254	13.5405	0.48511	0.00307393	0.657034	0.0169394	0.986008	0.976395	0.729293	0.799483
Cre13.g584200			chromosome_13:2991063-2999852	(M=1) PF03595 - Voltage-dependent anion channel		Voltage-dependent anion channel,Glutaredoxin	Thioredoxin_like superfamily,Hemerythrin-like superfamily,TDT superfamily,DUF4395 superfamily							24.0101	37.8786	10.6293	21.6959	15.3489	14.6696	5.57772	5.75149	8.37878	1.88108	0.63387	0.0289894	0.489922	0.000458597	1.04631	0.912021	0.969787	4.45424
Cre06.g299600	ZRT4	ZIP6	chromosome_6:7404649-7408397	Zinc/iron transporter	Very weak similarity to homologs; appears as CrZIP6 in PMID: 15710683; PMID: 16766055	ZIP Zinc transporter	Zip superfamily							5.88624	12.0733	6.13864	5.82318	9.31153	11.2673	4.93022	3.01191	8.83436	8.96621	0.487542	0.00307393	1.05417	0.834727	0.826421	0.571145	1.63691	0.985295
Cre10.g435750			chromosome_10:2423446-2430622	Serine/Threonine protein kinase	Serine/Threonine protein kinase. Previously annotated as two models, STPK21 and PTK26 (for protein tyrosine kinase)	Protein kinase domain	PKc_like superfamily							14.177	32.3648	6.59506	7.93301	11.8441	10.1317	0.0496425	0.124197	5.65155	6.52485	0.438038	0.00307393	0.831344	0.344015	1.16901	0.658141	0.399708	0.866158
Cre16.g657250		GOX17	chromosome_16:2058819-2063195	Glyoxal or galactose oxidase	The substrate of this oxidase is unsure, as the similarity is to both glyoxal oxidases and galactose oxidases, found in fungi, bacteria, animals and plants (both use the same Tyr radical / metal mechanism); the plant homologues are secreted, but the fate	Domain of unknown function (DUF1929),Glyoxal oxidase N-terminus	E_set superfamily							14.4214	30.573	86.5449	32.9729	116.751	60.7832	61.9075	3.93722	146.548	6.3663	0.471704	0.00307393	2.62473	0.000458597	1.92078	0.00317004	15.7237	23.0193
Cre08.g372200			chromosome_8:2529267-2530757											164.171	356.736	2137.65	434.022	782.755	363.888	1173.78	17.6849	1840.74	88.9204	0.460203	0.00307393	4.92521	0.000458597	2.15109	0.00317004	66.3719	20.701
Cre17.g701050			chromosome_17:714853-718356	(M=1) PF08790 - LYAR-type C2HC zinc finger		LYAR-type C2HC zinc finger	zf-LYAR superfamily,zf-met superfamily	AT2G19385.1	zinc ion binding	YCR087C-A	Putative protein of unknown function; green fluorescent protein (GFP)-fusion protein localizes to the nucleolus; YCR087C-A is not an essential gene			11.0273	14.0674	12.203	12.8067	6.5185	14.4357	28.1416	32.0024	13.7646	16.4943	0.78389	0.481098	0.952861	0.8348	0.451554	0.00317004	0.879359	0.834506
Cre12.g546600	FEA2		chromosome_12:8666911-8670847	Fe-assimilating protein	High-CO2 inducible, periplasmic protein. Cis-acting regulatory elements were characterized by Fei et al. 2009 [PMID: 19351705].	Low iron-inducible periplasmic protein	Fea1 superfamily							296.248	66.5301	125.158	168.702	87.7242	194.262	5.89102	4.05302	631.498	134.334	4.45284	0.00307393	0.741888	0.100915	0.451577	0.00317004	1.45349	4.70095
Cre17.g708750		NSG1	chromosome_17:1701854-1705790											54.2401	39.9268	33.0167	40.0608	38.9441	83.7806	64.774	66.9767	26.1085	195.774	1.35849	0.256643	0.824165	0.282143	0.464834	0.00317004	0.967112	0.13336
Cre16.g662600			chromosome_16:2729466-2732309	(M=11) PF01062 - Bestrophin, RFP-TM, chloride channel		Bestrophin, RFP-TM, chloride channel	Bestrophin superfamily	AT3G61320.1	Bestrophin-like protein					16.0685	12.0632	1.25633	1.5138	8.93505	18.7812	14.0232	30.2315	43.9198	38.2099	1.33203	0.33898	0.829918	0.572507	0.475744	0.00568854	0.463861	1.14944
Cre07.g352000			chromosome_7:5616512-5622604											1.99578	1.88132	1.70073	1.34891	574.11	1142.13	28.5337	3.03613	4.42493	2.26533	1.06084	0.954887	1.26082	0.344931	0.502666	0.0301629	9.39805	1.95333
Cre03.g179820			chromosome_3:4921087-4921833											5.14846	11.3473	8.77424	7.4143	6.36864	10.7189	16.7577	16.9311	11.8942	9.67988	0.453717	0.550933	1.18342	0.814732	0.594151	0.565958	0.989758	1.22875
