# Supplementary material for: Ni induces the CRR1-dependent regulon revealing overlap and distinction between hypoxia and Cu deficiency responses in Chlamydomonas reinhardtii
Source: Royal Society of Chemistry journal article supplement (doi:10.1039/c6mt00063k), 2016-01-01
Supplement: c6mt00063k2.xlsx [file c6mt00063k2.xlsx]

## Sheet: Cu
Supplemental Table 2.
Differentially accumulated transcripts from CC-4532 grown in TAP with (plus Cu) or without (minus Cu) copper. FPKM values resulted from realigning reads from Castruita, Madeli, et al. "Systems biology approach in Chlamydomonas reveals connections between copper nutrition and multiple metabolic steps." The Plant Cell 23.4 (2011): 1273-1292.
			FPKM					Fold change			CRR1 targets with lower transcript abundance in the absence of Cu
			4532		CRR1	crr1					CRR1 targets with higher transcript abundance in the absence of Cu
gene	symbol	location	minus Cu	plus Cu	minus Cu	minus Cu		4532 minus/plus	CRR1/crr1
higher transcript abundance in the presence of Cu
Cre01.g045200		chromosome_1:6335452-6338184	6.2052	30.4345	1.89712	16.4687		0.203887	0.115195
Cre12.g510050	CTH1	chromosome_12:2024725-2027967	55.8861	265.919	68.3792	373.709		0.210162	0.182974
Cre12.g537000		chromosome_12:6256569-6259730	53.5821	111.613	22.9191	96.1216		0.48007	0.238439
Cre12.g495450		chromosome_12:757511-760514	14.4355	33.9089	4.80883	7.57757		0.425714	0.634614
Cre04.g223050	CAH2	chromosome_4:2656607-2661032	10.141	32.421	21.1708	29.4984		0.312791	0.717693
Cre03.g184250		chromosome_3:5352666-5355715	4.4263	10.3487	42.4227	57.6072		0.427716	0.736413
Cre06.g297900		chromosome_6:7211614-7214970	3.23398	13.797	0.469779	0.50976		0.234397	0.921569
Cre10.g422850		chromosome_10:753060-759940	4.57174	12.66	1.96093	2.12494		0.361117	0.922817
Cre16.g662600		chromosome_16:2729466-2732309	14.0232	30.2315	43.9198	38.2099		0.463861	1.14944
Cre07.g327317		chromosome_7:2235241-2239413	7.02216	20.0404	2.55282	2.03516		0.3504	1.25436
Cre10.g463350	HRP3	chromosome_10:6068143-6071251	17.4897	35.9226	127.843	57.7705		0.486872	2.21295
Cre17.g733900		chromosome_17:4816326-4818172	8.65278	19.0107	9	2		0.455153	4.5
Cre09.g398400	TRP5	chromosome_9:1436048-1446304	6.06569	12.6616	39.6543	1.36207		0.479062	29.1133
Cre09.g405100		chromosome_9:351202-353930	13.4456	27.14	128.762	3.71885		0.495416	34.6241
Cre09.g404750	SRR2	chromosome_9:406340-412599	5.90332	13.1667	23.7986	0.667143		0.448352	35.6724
higher transcript abundance in the absence of Cu
Cre07.g346900		chromosome_7:4987084-4990515	980.022	24.5204	1929.22	10.7857		39.9676	178.868
Cre08.g372200		chromosome_8:2529267-2530757	1173.78	17.6849	1840.74	88.9204		66.3719	20.701
Cre17.g700950	FDX5	chromosome_17:704736-706717	2735.51	13.9841	1732.8	0.782322		195.616	2214.94
Cre01.g029700		chromosome_1:4388402-4390175	967.634	3.40454	1570.56	29.6352		284.219	52.9964
Cre16.g651050	CYC6	chromosome_16:1238557-1240109	1920.23	0	1279.65	0		inf.	inf.
Cre07.g346950		chromosome_7:4996499-5000945	331.109	19.6915	935.236	1.91876		16.8148	487.417
Cre07.g336800		chromosome_7:3611515-3613640	48.3849	11.1921	837.162	254.508		4.32313	3.28933
Cre07.g346050	CRD1	chromosome_7:4866865-4871395	1480.96	120.831	827.143	63.3417		12.2565	13.0584
Cre02.g085450	CPX1	chromosome_2:1646978-1650920	2408.92	142.729	776.067	129.348		16.8776	5.99984
Cre03.g199800	HYDA1	chromosome_3:8216107-8220752	188.732	45.7746	582.628	144.244		4.12307	4.03918
Cre12.g490500	CGL78	chromosome_12:1110734-1112794	925.97	126.319	541.872	69.7177		7.33041	7.77237
Cre17.g701700		chromosome_17:781799-786028	765.799	179.609	528.037	121.601		4.2637	4.34237
Cre05.g236039		chromosome_5:2551493-2555425	552.432	3.50132	461.979	19.0068		157.778	24.306
Cre07.g346850		chromosome_7:4980659-4983645	362.272	4.99537	404.327	4.29333		72.5216	94.1756
Cre10.g443050		chromosome_10:3253452-3256956	187.615	27.6249	302.693	39.0135		6.79152	7.75867
Cre03.g146447		chromosome_3:823537-827213	35.3089	7.78849	240.518	48.0182		4.53347	5.00889
Cre16.g657200		chromosome_16:2053507-2057940	260.999	4.75889	225.005	7.15083		54.8445	31.4656
Cre10.g434650	CTR3	chromosome_10:2302472-2307474	172.327	14.8023	216.239	6.97281		11.6419	31.0117
Cre09.g397250		chromosome_9:1623841-1629056	293.501	119.854	209.078	96.2553		2.44882	2.17212
Cre03.g183850	FDX6	chromosome_3:5317758-5320038	142.231	59.1263	203.926	74.4771		2.40555	2.7381
Cre16.g657250	GOX17	chromosome_16:2058819-2063195	61.9075	3.93722	146.548	6.3663		15.7237	23.0193
Cre02.g084450		chromosome_2:1526630-1530141	74.6546	2.38507	137.192	12.0704		31.3008	11.366
Cre11.g467527		chromosome_11:40145-45687	112.797	32.9159	119.373	31.7622		3.42682	3.75834
Cre12.g507800		chromosome_12:2289632-2292864	154.379	32.9779	107.066	6.64307		4.68129	16.1169
Cre10.g434350	CTR2	chromosome_10:2263854-2268812	152.732	7.50036	94.887	0.46884		20.3633	202.387
Cre02.g084400		chromosome_2:1523090-1526578	91.035	1.41633	85.0024	6.32683		64.2753	13.4352
Cre16.g652000		chromosome_16:1377011-1380376	73.9821	24.5639	77.9456	13.7313		3.01182	5.67649
Cre17.g734644		chromosome_17:4959481-4967303	166.64	25.4192	73.543	17.598		6.55567	4.17905
Cre02.g092350		chromosome_2:2518334-2523186	207.383	44.9409	73.3778	27.3077		4.61457	2.68707
Cre16.g663950		chromosome_16:2920032-2922957	162.868	39.8167	72.7268	28.4559		4.09044	2.55577
Cre12.g530350	IRT2	chromosome_12:5438305-5442687	19.5121	1.06747	70.0713	8.82088		18.2788	7.9438
Cre12.g547300		chromosome_12:8586056-8593637	39.4387	7.25597	66.2927	32.3722		5.43534	2.04783
Cre16.g695100		chromosome_16:165889-174125	90.9608	40.675	65.3271	32.2213		2.23628	2.02745
Cre01.g000150	ZRT2	chromosome_1:41895-46547	36.428	11.2365	54.4967	0.546165		3.24193	99.7807
Cre01.g029650	VPS35	chromosome_1:4378844-4387792	36.277	17.5753	53.2803	26.2292		2.06409	2.03134
Cre13.g570600	CTR1	chromosome_13:1254125-1259806	42.2321	12.8469	51.2155	5.03142		3.28734	10.1791
Cre05.g234100		chromosome_5:204045-209162	136.937	26.6596	50.8932	17.2601		5.1365	2.9486
Cre14.g609500		chromosome_14:267421-272847	12.8222	5.56345	50.6717	13.315		2.30472	3.80561
Cre03.g200350		chromosome_3:8167055-8173016	73.346	20.4916	50.357	23.8539		3.57932	2.11106
Cre12.g512400		chromosome_12:1757518-1764516	51.7404	13.1751	48.5666	13.8534		3.92714	3.50575
Cre16.g649300		chromosome_16:1032345-1036382	27.1542	11.4362	48.0058	15.5613		2.37441	3.08495
Cre06.g281900	ZIP7	chromosome_6:5203545-5207717	23.2063	9.48675	40.8804	17.883		2.44618	2.28599
Cre16.g656750		chromosome_16:1996284-2002953	19.7277	5.05687	38.9871	5.33018		3.90117	7.31441
Cre03.g179500		chromosome_3:4894433-4898365	65.1409	0.838409	36.8869	0.557579		77.6959	66.1555
Cre17.g723500		chromosome_17:3346461-3359038	19.4421	3.1876	35.1947	6.49399		6.09929	5.41958
Cre09.g393100		chromosome_9:2185960-2191671	12.5546	1.26058	33.9687	5.26567		9.95938	6.45097
Cre09.g389250	AOF1	chromosome_9:2753400-2757653	123.522	32.0388	32.0148	11.4631		3.85539	2.79286
Cre17.g730100	RSE1	chromosome_17:4189344-4194305	39.3607	1.16087	29.6359	5.27094		33.9062	5.62251
Cre09.g408464		chromosome_9:6602927-6611533	55.0723	20.3555	28.8313	10.856		2.70552	2.65579
Cre06.g304600		chromosome_6:8083769-8088679	87.2028	20.7023	27.948	12.8533		4.21223	2.17438
Cre17.g735350	FAP164	chromosome_17:5142509-5148365	28.7707	12.038	27.3088	13.5761		2.38999	2.01153
Cre01.g004700		chromosome_1:887957-891436	20.7061	7.22677	21.6198	9.17223		2.86519	2.35709
Cre03.g203569		chromosome_3:8630708-8634420	42.5742	0.783881	18.3876	0.236966		54.3121	77.5959
Cre04.g217907		chromosome_4:315620-323342	30.0701	13.3277	18.3071	6.72519		2.25621	2.72217
Cre11.g467540		chromosome_11:132495-137407	25.9029	0.715044	17.9903	0.806872		36.2256	22.2963
Cre09.g398993	HPD1	chromosome_9:5146345-5150707	64.4995	1.41735	15.4588	6.92523		45.5071	2.23224
Cre07.g331250		chromosome_7:2732408-2745463	24.459	10.6138	15.1171	7.71327		2.30445	1.95988
Cre06.g306000	GOX3	chromosome_6:8247467-8254313	24.9558	8.92605	14.2134	7.27028		2.79584	1.955
Cre16.g675100		chromosome_16:6218171-6224525	26.2182	7.04478	14.1225	4.81623		3.72165	2.93227
Cre06.g269300		chromosome_6:2550824-2555260	23.2354	8.11201	13.9362	4.20758		2.86432	3.31217
Cre10.g429350		chromosome_10:1584785-1589411	18.9047	9.37232	13.2068	4.22072		2.01708	3.12904
Cre05.g244000		chromosome_5:1451363-1457757	15.837	0.451125	9.77476	1.45164		35.1056	6.7336
Cre04.g217953		chromosome_4:685928-691875	11.7508	4.29862	8	1.74466		2.73362	4.58542
Cre16.g686501		chromosome_16:4782575-4793087	9.8617	3.9872	5	1		2.47334	5
Cre12.g485950		chromosome_12:1671654-1678140	9.63189	3.41329	4.96157	2.15353		2.82188	2.30392
Cre14.g630895		chromosome_14:3525988-3536074	16.0105	3.42717	4.84254	1.64658		4.67164	2.94097
Cre07.g352000		chromosome_7:5616512-5622604	28.5337	3.03613	4.42493	2.26533		9.39805	1.95333
Cre06.g265300		chromosome_6:2110125-2113118	400.657	0.173701	2.92772	0.0577616		2306.59	50.6863
Cre02.g087050		chromosome_2:1817106-1823202	10.9538	0.567423	2.85933	0.894465		19.3045	3.19669
Cre06.g264700		chromosome_6:2053025-2056617	179.228	0	0.386049	0		inf.	inf.
Cre06.g296750	HYDEF	chromosome_6:7003405-7012157	29.665	1.98794	23.0646	12.1706		14.9225	1.89511
Cre03.g168100		chromosome_3:3561458-3565452	33.3381	7.60976	38.473	20.3016		4.38097	1.89507
Cre16.g690130		chromosome_16:3875702-3878299	115.338	24.0899	62.2544	33.0243		4.78782	1.88511
Cre16.g686750	PTA3	chromosome_16:4744738-4750135	89.8432	38.8066	189.388	101.024		2.31515	1.87468
Cre17.g699000	PAT1	chromosome_17:441727-453059	45.1242	20.8714	0.053661	0.0290954		2.16201	1.84431
Cre12.g500500		chromosome_12:3053903-3057455	347.582	174.328	261.929	149.65		1.99384	1.75028
Cre13.g603550		chromosome_13:4469469-4474932	144.894	53.6123	38.7101	22.328		2.70263	1.7337
Cre03.g155051		chromosome_3:1896712-1902630	49.4318	16.3341	20.3753	12.2688		3.02629	1.66074
Cre13.g604700		chromosome_13:4724797-4727503	28.4674	9.99839	21.0219	12.8932		2.8472	1.63046
Cre07.g328000		chromosome_7:2328899-2333451	41.3252	14.6322	88.9215	55.583		2.82426	1.5998
Cre01.g043350	CAO1	chromosome_1:6081228-6085440	217.575	88.1001	163.508	103.506		2.46963	1.5797
Cre08.g377850		chromosome_8:3867327-3873312	17.3131	7.39532	6.7245	4.29223		2.34109	1.56667
Cre13.g569250	CGLD9	chromosome_13:1100775-1103630	57.2795	18.625	38.4777	26.5234		3.07541	1.45071
Cre01.g056331		chromosome_1:7814036-7816550	76.1697	25.6986	76.7551	53.657		2.96396	1.43048
Cre02.g106950		chromosome_2:5319869-5325761	14.7415	4.68373	11.13	7.81644		3.14738	1.42392
Cre06.g259401		chromosome_6:1452734-1458856	32.1008	16.1673	19.7717	14.2029		1.98554	1.39209
Cre13.g603500		chromosome_13:4466337-4469423	387.424	94.3721	246.59	180.828		4.10528	1.36367
Cre01.g004750		chromosome_1:891736-897598	26.0766	1.69102	8.40332	6.24831		15.4206	1.34489
Cre17.g711150		chromosome_17:1990389-1994722	44.5524	21.3354	23.4793	17.4598		2.08819	1.34476
Cre02.g112850	COQ6	chromosome_2:6074095-6077217	11.6947	4.00257	6.75359	5.07348		2.9218	1.33116
Cre03.g154850	COQ4	chromosome_3:1870191-1874321	10.1052	5.14327	6.8692	5.71799		1.96474	1.20133
Cre16.g658800		chromosome_16:2232958-2235567	20.978	9.55364	35.132	29.9947		2.19581	1.17127
Cre11.g468250		chromosome_11:1914593-1919615	15.925	6.4657	11.3287	9.76623		2.463	1.15999
Cre14.g630883		chromosome_14:3518298-3525838	80.145	29.4869	39.5368	34.5896		2.71799	1.14303
Cre07.g323950		chromosome_7:1501201-1505673	13.2093	5.84982	6.04903	5.31007		2.25807	1.13916
Cre03.g143967		chromosome_3:106792-108580	34.1887	14.4477	59.9985	54.07		2.36638	1.10964
Cre07.g346800		chromosome_7:4974545-4980657	55.5595	21.8961	32.3939	29.5688		2.53742	1.09554
Cre03.g191250	LCI34	chromosome_3:6044305-6047450	118.923	32.2224	154.061	141.91		3.69069	1.08562
Cre02.g095137		chromosome_2:3591545-3600340	65.2137	11.1658	46.2762	42.7245		5.84049	1.08313
Cre03.g169550	AOX2	chromosome_3:3722160-3726636	14.4038	0.872959	8.38927	7.98857		16.5	1.05016
Cre10.g426800		chromosome_10:1252927-1258179	31.9405	0.321808	22.9013	22.4585		99.2533	1.01972
Cre06.g296700		chromosome_6:6998682-7003289	61.0909	7.77632	125.561	125.457		7.85602	1.00083
Cre02.g082700	COX15	chromosome_2:1259186-1265628	25.0801	12.6944	12.8542	13.2913		1.97568	0.967114
Cre16.g673050		chromosome_16:6493524-6496515	16.9325	3.05256	12.4481	13.5075		5.54698	0.921569
Cre02.g098850	NTR2	chromosome_2:4246406-4252056	20.8674	6.64745	36.3312	40.082		3.13916	0.906422
Cre12.g542350		chromosome_12:9159293-9161650	69.6996	31.1565	146.815	165.99		2.23708	0.884481
Cre09.g408600		chromosome_9:6622075-6624920	47.5886	12.372	25.661	29.2759		3.84648	0.876523
Cre05.g232850	COX17	chromosome_5:411020-412802	61.1178	30.3238	72.2499	86.3927		2.01551	0.836296
Cre16.g667250		chromosome_16:4530310-4532917	26.2074	12.3698	77.1203	93.1507		2.11866	0.827909
Cre09.g389300		chromosome_9:2748217-2753260	10.4128	4.53287	4.64605	5.89902		2.29718	0.787597
Cre03.g174400	CDO1	chromosome_3:4263654-4266596	13.127	5.92094	8.51592	10.8158		2.21705	0.787359
Cre07.g332851		chromosome_7:2949134-2951242	26.1947	9.58615	29.2002	39.8772		2.73256	0.732253
Cre13.g590500		chromosome_13:3900217-3904765	3404.47	1447.27	1590.24	2325.55		2.35234	0.683812
Cre17.g707700	NRM1	chromosome_17:1590874-1595730	17.3163	7.86722	7.13629	10.7783		2.20107	0.662098
Cre11.g474800	OTA1	chromosome_11:2391896-2397452	30.3181	15.1468	25.326	44.5645		2.00162	0.5683
Cre03.g188400	RBO2	chromosome_3:5753405-5758534	10.6311	2.57871	2.79511	5.92426		4.12264	0.471807
Cre12.g527200		chromosome_12:5153639-5156735	11.3127	5.47896	6.46259	22.5045		2.06475	0.287169
Cre05.g248400	CAH4	chromosome_5:772397-774699	18.0673	9.19833	133.396	809.7		1.96419	0.164747
Cre17.g714200		chromosome_17:2307310-2316146	40.5055	15.3005	1.52968	18.8561		2.64733	0.0811239
Cre10.g424750	PPD1	chromosome_10:963631-972467	42.4765	5.23096	0.108306	2.51501		8.12021	0.0430638
Cre12.g544450		chromosome_12:8895528-8901892	90.5225	40.8358	2.27168	301.705		2.21674	0.00752947

## Sheet: CRR1 v crr1
Supplemental Table 2.
Differentially accumulated transcripts from from the pairwise comparison of CRR1 and crr1 grown in the absence fo Cu. FPKM values resulted from realigning reads from Castruita, Madeli, et al. "Systems biology approach in Chlamydomonas reveals connections between copper nutrition and multiple metabolic steps." The Plant Cell 23.4 (2011): 1273-1292.
		FPKM			fold change
		minus Cu
gene	symbol	CRR1	crr1		CRR1/crr1
higher transcript abundance in crr1
Cre11.g467645		4.86925	9.52945		0.510969
Cre17.g707200	LIC2	4.09654	9.55458		0.428751
Cre12.g551700		4.56375	9.56606		0.477077
Cre06.g278245		1.92191	9.56868		0.200854
Cre04.g216550		1.76498	9.57594		0.184314
Cre10.g448650		4.83896	9.62006		0.503007
Cre16.g661250		4.77234	9.62142		0.496012
Cre05.g246100		4.11916	9.62567		0.427935
Cre09.g396809		3.26986	9.64845		0.3389
Cre06.g279900	VFL3	4.30709	9.6615		0.445799
Cre09.g389504		4.08097	9.68687		0.421289
Cre05.g246550	LAO3	4.7778	9.7208		0.491503
Cre01.g012800	FAP230	4.65486	9.75237		0.477306
Cre11.g477900		4.10966	9.75684		0.421208
Cre13.g586600		4.57882	9.75743		0.469265
Cre01.g011630		0.261254	9.76529		0.0267533
Cre09.g411500		3.4878	9.801		0.355862
Cre12.g505250	FAP288	4.54509	9.81898		0.462888
Cre06.g299500		4.62226	9.8274		0.470344
Cre06.g311200		3.34317	9.84063		0.339731
Cre06.g270800		5.07248	9.90752		0.511983
Cre12.g488600		4.92566	9.9542		0.494832
Cre02.g111400		4.07818	9.97159		0.40898
Cre03.g194600		3.63629	9.97607		0.364501
Cre13.g565301		3.65388	10.0037		0.365253
Cre09.g389875	PDE7	3.71303	10.0271		0.370299
Cre12.g543052		3.95275	10.063		0.3928
Cre09.g402200		5.11117	10.0693		0.507599
Cre02.g144100	ELG12	4.51225	10.0769		0.447782
Cre11.g479950		4.27753	10.1001		0.423514
Cre02.g095650		3.66582	10.1221		0.36216
Cre03.g207650		4.99154	10.1557		0.491501
Cre09.g387350	CYG30	2.80069	10.1591		0.275683
Cre03.g161450		4.37738	10.1626		0.430734
Cre12.g532200		4.20542	10.2067		0.412025
Cre03.g162500		2.75041	10.2799		0.267552
Cre12.g497450		4.73964	10.286		0.460786
Cre14.g610200		4.79869	10.2866		0.466499
Cre13.g603950		5.19455	10.3179		0.50345
Cre12.g547800		3.83477	10.3258		0.371378
Cre09.g394658	LCI28	4.51029	10.3508		0.435743
Cre12.g541450		1.96404	10.3896		0.189039
Cre07.g351100		3.7234	10.3961		0.358154
Cre03.g179450	SRR7	4.68724	10.4584		0.448179
Cre09.g388763		5.23926	10.5145		0.498289
Cre13.g576850		5.12641	10.6393		0.481837
Cre16.g680950		5.0693	10.6413		0.47638
Cre10.g431900		2.39725	10.6652		0.224773
Cre02.g113900		2.71152	10.6818		0.253845
Cre09.g406150		3.05537	10.7144		0.285165
Cre07.g324350		5.26756	10.7228		0.491249
Cre13.g581700		2.0708	10.7467		0.192692
Cre02.g087324		4.15031	10.7584		0.385774
Cre09.g399912		4.53811	10.7729		0.421252
Cre12.g501950		3.39957	10.7829		0.315274
Cre02.g146850		5.34717	10.8103		0.494637
Cre02.g118300		4.89344	10.8274		0.45195
Cre11.g483250		3.94222	10.8408		0.363647
Cre16.g667100	LMR3	5.30461	10.8499		0.488909
Cre12.g516550		5.1739	10.8577		0.476519
Cre10.g436300		3.44339	10.8696		0.316791
Cre02.g078650		5.41169	10.8775		0.497512
Cre01.g017850		2.24062	10.9029		0.205507
Cre03.g161606		3.1789	10.9253		0.290967
Cre06.g278137		2.95876	10.9263		0.270792
Cre13.g563950		1.67045	10.9361		0.152746
Cre11.g469650		4.33182	10.9611		0.395199
Cre02.g095500		3.97438	11.0077		0.361055
Cre12.g552400		4.02431	11.0093		0.365537
Cre07.g330650		3.70121	11.0792		0.334068
Cre12.g510600		2.51953	11.085		0.227292
Cre07.g333100		0.49155	11.1893		0.0439304
Cre12.g522150	FAP194	5.7228	11.1952		0.511183
Cre03.g146547		5.17171	11.2757		0.45866
Cre11.g475800		5.21982	11.3281		0.460785
Cre16.g693300		4.51152	11.3349		0.39802
Cre16.g652250		4.06677	11.4525		0.355099
Cre09.g391467		5.25452	11.4583		0.458578
Cre12.g531750		4.29252	11.4893		0.37361
Cre02.g119651		4.8208	11.6603		0.413437
Cre11.g467559		4.83146	11.6675		0.414096
Cre02.g074400		6.00186	11.7134		0.512393
Cre06.g258300		4.83308	11.7798		0.410285
Cre17.g719701		5.90658	11.7827		0.501293
Cre12.g509250	EYE2	5.97257	11.8472		0.504133
Cre10.g439450		2.72216	11.863		0.229466
Cre09.g415900		5.55277	12.0507		0.460784
Cre08.g380800		3.57587	12.0731		0.296185
Cre17.g739350		5.2164	12.1482		0.429397
Cre10.g460650	CYN52	5.79722	12.4089		0.467182
Cre01.g005750		0.10694	12.5325		0.00853301
Cre03.g200319		3.45499	12.5666		0.274934
Cre06.g302050		4.12418	12.5689		0.328126
Cre09.g402441		1.10156	12.5968		0.0874476
Cre16.g690319		1.2087	12.6785		0.0953346
Cre04.g221450		1.60161	12.6895		0.126215
Cre14.g618550		3.5302	12.7065		0.277826
Cre16.g688600		5.5841	12.7246		0.438843
Cre11.g467653		0.667369	12.7368		0.0523969
Cre03.g178750		6.1347	12.7443		0.481368
Cre09.g396350		3.92421	12.7486		0.307815
Cre05.g232751		5.759	12.7495		0.451704
Cre12.g504050	LAG2	6.21782	12.8777		0.482836
Cre13.g587600		6.54159	12.9375		0.50563
Cre12.g540750		6.35941	12.9387		0.491503
Cre03.g153800		6.29721	12.9572		0.486001
Cre13.g585600		2.59324	13.0724		0.198375
Cre08.g359300	PHO1	0.840771	13.2287		0.0635566
Cre03.g168300		6.40244	13.2354		0.483736
Cre11.g467646		5.7597	13.246		0.434826
Cre01.g034325		5.97012	13.2479		0.450647
Cre03.g204465		5.33293	13.2928		0.401189
Cre07.g318426		6.65485	13.3593		0.498144
Cre06.g297950		6.42937	13.3853		0.480331
Cre12.g543000		2.82718	13.5129		0.209221
Cre09.g403550		5.60244	13.5341		0.41395
Cre14.g617500	RSP14	6.90455	13.6551		0.505639
Cre03.g159254		0.116575	13.6616		0.00853304
Cre16.g680454		4.9623	13.677		0.362821
Cre12.g485350		3.5452	13.7127		0.258534
Cre12.g487050		4.10325	13.719		0.299092
Cre12.g501000		6.01017	13.7201		0.438056
Cre08.g358600		6.70563	13.7211		0.488709
Cre08.g360400	ERM1	4.60198	13.7791		0.333983
Cre12.g534400		6.66758	13.8001		0.483154
Cre12.g484950		5.70424	13.8839		0.410853
Cre06.g301550		5.82767	13.9016		0.419209
Cre17.g716750		4.77311	13.912		0.343093
Cre16.g659800		5.86766	13.9177		0.421597
Cre16.g680250		4.96015	13.9197		0.35634
Cre17.g746897		6.28377	13.9343		0.450957
Cre10.g441250		6.72453	13.9809		0.48098
Cre17.g700800		0.31059	13.9865		0.0222064
Cre12.g560800		2.76822	13.9904		0.197866
Cre06.g275000		5.34325	14.0083		0.381435
Cre07.g344300		7.08277	14.0655		0.503556
Cre17.g735600		3.63289	14.1031		0.257595
Cre16.g685501		5.86476	14.1361		0.414878
Cre16.g683450		5.55593	14.3016		0.388483
Cre07.g344500		1.7055	14.3566		0.118796
Cre12.g557700		6.77158	14.3692		0.471257
Cre17.g699500		6.95925	14.4572		0.481369
Cre06.g287400		4.29418	14.4632		0.296904
Cre02.g104500	CDJ4	5.45287	14.4702		0.376834
Cre01.g027900		7.16067	14.4806		0.494501
Cre14.g611484		6.19273	14.5436		0.425804
Cre18.g749947	FAP21	7.36734	14.6732		0.502095
Cre17.g745847		7.55218	14.7509		0.511981
Cre03.g154100		5.17669	14.88		0.347896
Cre06.g292249		4.49791	14.9255		0.301357
Cre03.g206850		5.45647	14.9579		0.364789
Cre02.g119950		5.70242	14.9771		0.380743
Cre16.g652350	FAP183	7.43786	14.9953		0.496013
Cre12.g532314		6.99767	15.1864		0.460785
Cre12.g489300		3.46301	15.1866		0.228031
Cre12.g485000	FAP182	6.35452	15.3777		0.41323
Cre10.g446300		7.85399	15.6168		0.502919
Cre06.g267350		7.88523	15.6291		0.504522
Cre06.g299800		7.97648	15.6746		0.508879
Cre13.g571300		4.64878	15.7346		0.29545
Cre09.g401650		7.65021	15.7631		0.485324
Cre16.g680350		7.04402	15.7677		0.446737
Cre08.g381000		4.01751	15.8162		0.254012
Cre12.g492700	FAS1	6.79838	15.851		0.428893
Cre07.g339200		7.00097	15.891		0.440562
Cre06.g308050		4.50013	15.9203		0.282666
Cre07.g335600	NAR1.4	5.50799	16.0107		0.344019
Cre16.g660050		5.52736	16.119		0.34291
Cre16.g664700		7.86544	16.178		0.486181
Cre06.g299900		7.6376	16.2364		0.4704
Cre09.g414300		8.01876	16.24		0.493766
Cre01.g013150		6.57205	16.2851		0.403562
Cre09.g406851		7.31783	16.3462		0.447678
Cre05.g240000		6.81795	16.4148		0.415354
Cre03.g148500		5.50541	16.4284		0.335115
Cre01.g045200		1.89712	16.4687		0.115195
Cre03.g200000		7.83803	16.5051		0.474885
Cre11.g482650		2.48024	16.678		0.148713
Cre10.g443750		8.35386	16.7062		0.500045
Cre16.g677765		6.95751	16.8415		0.413117
Cre09.g409750	CAX2	5.72754	16.8448		0.340018
Cre12.g506851		3.46908	16.9843		0.204252
Cre16.g650950		6.77854	17.0185		0.398304
Cre05.g240950		7.0465	17.0336		0.413682
Cre11.g474900		7.82992	17.1233		0.457267
Cre17.g699350		4.88977	17.2134		0.284068
Cre01.g051800	AST2	7.93251	17.34		0.457469
Cre04.g212500	CGL42	7.0708	17.3467		0.407616
Cre12.g528800		7.09597	17.3574		0.408815
Cre03.g145267		4.57532	17.3927		0.26306
Cre17.g741050		8.73721	17.4151		0.501703
Cre16.g673057		4.44475	17.45		0.254713
Cre09.g402293		7.45393	17.6199		0.42304
Cre13.g573750		8.65217	17.8058		0.485919
Cre03.g186900		8.78691	17.8499		0.492267
Cre11.g467736		6.34741	18.0054		0.352528
Cre08.g377950		5.65652	18.1376		0.311867
Cre13.g569150		5.7076	18.4665		0.309079
Cre07.g315050	GGH1	6.91531	18.5521		0.372751
Cre10.g434800		7.3129	18.5958		0.393255
Cre12.g520050		1.21525	18.6003		0.065335
Cre09.g391838		4.82456	18.6086		0.259265
Cre05.g247550		8.06089	18.7345		0.43027
Cre05.g238100	PTK25	9.47768	18.7688		0.50497
Cre17.g725550	GLD1	9.00082	18.8044		0.478655
Cre02.g115900		9.19811	18.8446		0.488103
Cre17.g714200		1.52968	18.8561		0.0811239
Cre17.g724750		7.09549	18.8664		0.376091
Cre06.g307075		9.67095	18.8892		0.511983
Cre06.g286850		7.81023	18.9803		0.411491
Cre03.g161500		5.66858	19.0681		0.297281
Cre04.g218050	RWP8	9.02708	19.0855		0.472981
Cre10.g441750		6.48235	19.1102		0.339209
Cre03.g151450		6.34797	19.219		0.330297
Cre03.g174250	FAP111	6.20018	19.2431		0.322203
Cre06.g277100		9.17883	19.3007		0.47557
Cre12.g547100		6.97813	19.4397		0.358963
Cre16.g674964		9.69968	19.4716		0.498145
Cre03.g195950		7.35466	19.5377		0.376434
Cre01.g038750	MOT7	9.01264	19.6839		0.457869
Cre06.g309850		9.20414	19.6955		0.467322
Cre17.g730000		5.52716	19.7617		0.279691
Cre09.g386950		9.86972	19.7717		0.499184
Cre16.g686000		10.1324	19.7805		0.512242
Cre05.g239200	FAP275	9.61071	19.9092		0.482727
Cre01.g013500		7.4522	19.9207		0.374093
Cre07.g325760		8.1388	19.9411		0.408142
Cre16.g653450		9.73156	20.1373		0.48326
Cre02.g078600	RSP8	9.57882	20.2135		0.473882
Cre09.g391450	HCP1	3.49476	20.5968		0.169675
Cre12.g497100		7.33548	20.5986		0.356115
Cre11.g468700		9.60457	20.6482		0.465153
Cre01.g053500		10.1171	20.8478		0.485284
Cre16.g686285		9.26656	20.889		0.44361
Cre03.g186300	FAP146	9.45053	21.1805		0.44619
Cre09.g400960		9.0319	21.2936		0.42416
Cre03.g205361		10.7815	21.3602		0.504747
Cre02.g112300		11.0317	21.5285		0.512423
Cre11.g467792		4.04498	21.7467		0.186004
Cre12.g541400		0.705993	22.0034		0.0320856
Cre03.g173100		3.97593	22.1928		0.179154
Cre13.g572600		4.21864	22.1968		0.190056
Cre02.g105300	ANK19	11.1114	22.4435		0.495083
Cre03.g187350	TUD1	9.48956	22.457		0.422566
Cre13.g606800		10.8932	22.4586		0.485035
Cre06.g287100		9.55441	22.4812		0.424996
Cre12.g527200		6.46259	22.5045		0.287169
Cre02.g108050		10.6318	22.7873		0.466567
Cre09.g389838		3.5498	22.8014		0.155683
Cre09.g405500		2.93938	22.8371		0.128711
Cre01.g010832		4.87877	22.8995		0.213051
Cre12.g496150		8.28639	22.9304		0.361371
Cre05.g241900		10.1249	23.095		0.438402
Cre02.g073750	KLP1	10.542	23.2845		0.452748
Cre02.g095114		5.13065	23.2886		0.220307
Cre06.g271700		11.8251	23.4219		0.504874
Cre17.g740950		10.0593	23.455		0.428877
Cre02.g110950	FAP133	11.912	23.4934		0.507036
Cre06.g278270		8.84061	23.5281		0.375747
Cre16.g693200		2.75851	23.5588		0.11709
Cre17.g728550		9.42104	23.5723		0.399666
Cre09.g394325	ELI3	9.79435	23.6683		0.413817
Cre06.g258226		11.654	23.7295		0.491119
Cre05.g240450		11.3131	23.9057		0.473239
Cre02.g115050	RSE3	9.57119	24.0086		0.398657
Cre11.g467572		8.48944	24.1998		0.350806
Cre09.g394917		12.2852	24.2825		0.505928
Cre13.g569500		11.0174	24.3471		0.452514
Cre08.g368800		2.10747	24.4106		0.0863342
Cre12.g529150		11.1092	24.4317		0.454704
Cre10.g423850	SRR26	8.8212	24.4371		0.360976
Cre10.g447050		8.8747	24.4407		0.363112
Cre10.g451200		0.14558	24.5379		0.00593286
Cre12.g545850		11.1871	24.5951		0.454851
Cre07.g329750		10.1142	24.6371		0.410527
Cre05.g244350		4.51174	24.8458		0.18159
Cre09.g396587		12.7519	25.2565		0.504896
Cre09.g407750		11.089	25.2911		0.438455
Cre01.g008950		9.43778	25.343		0.372402
Cre10.g458400	SRR16	10.3051	25.4609		0.404742
Cre01.g053000	GPD2	11.9669	25.6687		0.466206
Cre03.g185150		11.6787	25.7057		0.454323
Cre09.g392208		8.1536	25.7342		0.316839
Cre06.g278101	STD1	12.1423	25.749		0.471564
Cre06.g292500	CYN23	10.2954	25.7919		0.399172
Cre12.g506750		1.26298	25.9246		0.0487174
Cre09.g397623		1.43218	26.0306		0.0550191
Cre12.g507050		11.3541	26.2088		0.433217
Cre06.g278271		12.1752	26.2109		0.464509
Cre02.g117200		7.6551	26.3655		0.290345
Cre01.g045950		8.97549	26.4188		0.339739
Cre04.g212600		12.8161	27.1718		0.471669
Cre06.g290000	GIP1	8.79616	27.2026		0.323357
Cre08.g372550	CDKB1	13.557	27.3022		0.496553
Cre17.g728050		13.2042	27.4862		0.480394
Cre17.g732150	FAP130	12.3192	27.6187		0.446046
Cre01.g045350	FAP155	14.1393	27.9246		0.506338
Cre16.g676700		12.5091	28.1102		0.445002
Cre01.g035350		13.7093	28.139		0.487199
Cre01.g002900		7.00844	28.2834		0.247793
Cre16.g658400	FDX2	3.39926	28.4429		0.119512
Cre16.g673281		12.581	28.6893		0.438526
Cre06.g273100		13.0565	28.7543		0.454071
Cre17.g722851		3.03777	28.7677		0.105597
Cre05.g230650		12.5831	29.3218		0.429138
Cre12.g511750		11.575	29.5163		0.392156
Cre14.g610100		15.1382	29.5679		0.511981
Cre10.g421300		10.3091	29.5809		0.348505
Cre02.g097050		12.0293	29.6835		0.405252
Cre11.g480250		4.35096	29.7312		0.146343
Cre03.g207600		9.72402	29.7986		0.326325
Cre12.g499550		8.14981	29.8638		0.272899
Cre11.g468850	FAP152	12.5683	29.8987		0.420363
Cre01.g004651		9.7159	30.1222		0.322549
Cre03.g200950	FAP273	15.3795	30.2155		0.508994
Cre08.g358561		14.0392	30.3636		0.462369
Cre17.g713200	OMT2	7.2806	30.602		0.237913
Cre10.g456750		14.1576	30.6104		0.462509
Cre07.g323050	PEN2	11.4692	30.627		0.37448
Cre12.g488000		11.647	30.7847		0.378337
Cre10.g422700		13.8315	30.9268		0.447233
Cre02.g080150		3.46991	31.0466		0.111765
Cre14.g613600		12.5498	31.0897		0.403664
Cre14.g620400	SPC22	15.2894	31.2233		0.489679
Cre16.g649650		11.5837	31.388		0.369049
Cre02.g088651		12.0886	31.555		0.383096
Cre06.g309600		15.1455	31.7392		0.477186
Cre03.g159300		10.0308	31.7421		0.316009
Cre10.g441900	FAP145	15.0526	31.7765		0.473702
Cre11.g483351		4.38524	32.0556		0.136801
Cre16.g688200		14.4773	32.1925		0.44971
Cre16.g689600	FAP73	13.0953	32.324		0.405126
Cre07.g342200	FAP259	16.0965	32.6663		0.492756
Cre02.g087500		9.98197	32.7504		0.304789
Cre03.g177500		11.5745	33.0794		0.349901
Cre12.g538100		15.9298	33.2457		0.479154
Cre09.g387450		7.42053	33.4708		0.221702
Cre14.g632450		15.7948	33.5337		0.471013
Cre03.g178500	RIB43	16.9849	33.9552		0.500215
Cre07.g344900		14.6499	33.9698		0.431262
Cre16.g663350		11.6109	34.0754		0.340741
Cre10.g463200		16.5183	34.1861		0.483188
Cre10.g450350	IFT25	15.8807	34.2946		0.463067
Cre07.g332150		14.4133	34.3503		0.419597
Cre06.g262300	CYN51	10.4922	34.7361		0.302055
Cre06.g271800	LCI36	17.8265	34.9137		0.510588
Cre16.g683200		3.63695	34.9263		0.104132
Cre03.g176000		14.659	34.9773		0.4191
Cre10.g426450		12.4233	35.6682		0.348302
Cre02.g145950		16.9701	36.054		0.470686
Cre12.g561000	CYN28	18.7877	36.8129		0.510356
Cre12.g543900		13.9263	37.2517		0.373843
Cre08.g384750		9.97892	37.4587		0.266398
Cre07.g336300		16.6018	37.9026		0.438012
Cre02.g099350	SRR8	4.34686	38.0664		0.114192
Cre01.g015850	FAP68	18.885	38.2769		0.493379
Cre04.g217900		16.6201	38.3377		0.433518
Cre12.g558050		15.7871	38.3679		0.411466
Cre09.g390949	FAP140	19.1596	38.5183		0.497416
Cre03.g205473		11.9017	38.6571		0.307879
Cre03.g196250		12.0132	38.6903		0.310496
Cre01.g033300		7.08677	38.8483		0.182422
Cre07.g332300	GWD2	19.1587	38.922		0.492233
Cre09.g413100		11.4704	39.0348		0.293851
Cre17.g727300		19.6704	39.2447		0.501224
Cre03.g204450		3.88578	39.4517		0.0984946
Cre02.g073600		16.1622	39.4788		0.409389
Cre11.g467735		15.031	39.8012		0.377652
Cre17.g747847		19.4407	39.8168		0.488254
Cre03.g154950		19.9534	40.6196		0.491226
Cre01.g047950	IFT27	15.11	40.6901		0.371343
Cre12.g504950	UOX1	8.20564	40.7227		0.2015
Cre02.g092850	DLC1	20.4929	41.0017		0.499806
Cre07.g321800		0.609276	41.0727		0.0148341
Cre02.g092150		20.9008	41.1131		0.508373
Cre08.g381450		18.1254	41.2653		0.439241
Cre07.g321750		0.543222	41.3188		0.0131471
Cre12.g520350	ALD1	18.1817	41.3255		0.439963
Cre02.g078550	FAP210	21.0725	41.9042		0.502873
Cre07.g328800	NSG13	9.19212	41.9529		0.219106
Cre12.g497150		17.6355	41.9938		0.419955
Cre05.g238301		20.3551	42.1536		0.482879
Cre07.g349119		11.7244	42.1825		0.277945
Cre02.g075000		21.484	42.2847		0.50808
Cre10.g462600		16.9471	42.6361		0.397482
Cre02.g119700		8.84661	42.9784		0.205839
Cre16.g656600		14.2831	43.5174		0.328216
Cre06.g307750		6.5835	43.6082		0.150969
Cre02.g119450		13.3635	43.6708		0.306005
Cre01.g039200		20.5777	43.8185		0.469612
Cre02.g099950		22.755	44.7905		0.508032
Cre09.g398882		23.0137	45.0699		0.510622
Cre12.g549000	PHC4	20.2746	45.1409		0.44914
Cre03.g161578		21.7465	45.3976		0.479023
Cre16.g685000		18.2168	46.2958		0.393487
Cre09.g386756		23.7112	46.4651		0.510301
Cre12.g542150		15.7444	47.0626		0.334542
Cre06.g251200	IFT43	22.5268	47.9231		0.470061
Cre02.g114700	CYN17	24.4215	48.0613		0.508132
Cre02.g104350	PDI5	22.3221	48.3056		0.462102
Cre12.g555700	DNJ15	6.03306	48.3697		0.124728
Cre14.g629050		13.1419	48.5505		0.270685
Cre03.g200700	FAP166	17.7187	49.109		0.360804
Cre05.g239400		21.8079	49.1454		0.443742
Cre17.g723800		17.0801	49.1754		0.34733
Cre08.g370900		11.5276	49.8951		0.231037
Cre12.g500050		21.5978	50.0318		0.431681
Cre03.g161150		7.21242	50.3068		0.143369
Cre02.g115950		22.2881	50.5189		0.441183
Cre02.g145250	RPS27e2	21.7897	50.8433		0.428566
Cre14.g617550	ODA14	23.9783	50.9849		0.470302
Cre03.g176750		15.104	52.4642		0.287892
Cre01.g032700	GLK1	25.568	52.5923		0.486155
Cre12.g555450		26.2257	52.9477		0.495313
Cre08.g376300		12.1173	52.9739		0.228741
Cre07.g320600		17.7454	53.2025		0.333544
Cre12.g527250		4.93414	53.3405		0.0925027
Cre06.g278194	FAP236	27.0999	53.4624		0.506896
Cre17.g737300		21.1155	53.6215		0.393788
Cre09.g388800	GDH1	18.1797	54.2763		0.334947
Cre03.g193300		22.8799	54.4896		0.419895
Cre11.g467721		16.671	55.0934		0.302595
Cre03.g172900		26.6486	55.2721		0.482135
Cre10.g456000	FAP191	24.7752	55.3231		0.447827
Cre02.g076650		22.4647	55.3947		0.405539
Cre02.g142126	FAP115	23.0184	55.6219		0.413837
Cre16.g680588		28.864	56.4174		0.511615
Cre02.g076950		23.7455	56.8935		0.417368
Cre12.g496700		18.3265	57.7463		0.317362
Cre02.g097100		6.24613	58.3308		0.107081
Cre03.g180350	CKS1	29.6174	58.6194		0.505249
Cre12.g519500	CAX1	24.4227	59.0085		0.413884
Cre16.g689087		26.838	59.1529		0.453706
Cre02.g086100	CGL40	31.1718	62.4233		0.499362
Cre11.g474950		24.4681	62.9907		0.38844
Cre02.g085257		19.4545	63.0621		0.308497
Cre17.g707350		26.6802	63.7594		0.418451
Cre17.g731800		13.3637	63.8462		0.209311
Cre13.g605200		19.4412	63.8596		0.304437
Cre13.g606150		25.7491	63.9677		0.402533
Cre17.g716700		29.316	64.2111		0.456557
Cre03.g175351		1.94657	65.5224		0.0297085
Cre01.g040701		26.4361	65.9653		0.400758
Cre12.g503450		31.1603	67.2863		0.4631
Cre01.g011050		24.711	67.8872		0.364001
Cre07.g352550	RDP3	31.9431	67.9551		0.470062
Cre16.g694203		21.1342	68.0857		0.310406
Cre05.g240300		6.95902	68.5656		0.101494
Cre12.g495550		34.3417	69.0716		0.49719
Cre09.g404201		12.3126	69.6154		0.176866
Cre11.g467759		33.3962	69.8617		0.478033
Cre05.g241637		35.1382	70.1832		0.500664
Cre16.g683371	ODC2	35.6841	70.5345		0.50591
Cre16.g677382		31.5824	70.6689		0.446907
Cre13.g573500	FAP95	32.5524	71.8913		0.4528
Cre09.g396800		29.4377	72.7673		0.404546
Cre09.g388850	ACA1	29.8263	73.2029		0.407447
Cre10.g432850	FAP77	37.6933	73.9704		0.509573
Cre03.g168950		27.4487	74.0539		0.370658
Cre11.g467709		28.311	74.7976		0.378501
Cre12.g518800		29.3139	76.0883		0.385262
Cre12.g533150		12.1887	76.851		0.158602
Cre07.g325741	PTB2	27.3697	76.8698		0.356053
Cre03.g187200	ODA13	36.8469	77.8966		0.473023
Cre09.g391650	HCP4	11.1305	78.0356		0.142634
Cre01.g004900		25.5719	80.0368		0.319502
Cre12.g546400	DLC7b	38.0324	80.3541		0.47331
Cre03.g206750		26.4639	80.4176		0.329081
Cre01.g049950		40.4083	85.4122		0.473098
Cre03.g187250		33.2462	86.1125		0.386079
Cre02.g147100	FAP265	23.6278	87.3165		0.270599
Cre06.g278209	PRL8	22.5465	87.6311		0.257289
Cre11.g467749		43.6314	87.7411		0.497274
Cre09.g388350	MMP11	2.21745	88.7276		0.0249917
Cre09.g393543	HCP2	13.078	89.1878		0.146634
Cre16.g688550	GST1	34.1156	89.7356		0.380179
Cre24.g755497		41.6084	92.225		0.451162
Cre02.g113400		42.238	93.7012		0.450773
Cre02.g075400		23.1868	95.9848		0.241567
Cre12.g537000		22.9191	96.1216		0.238439
Cre02.g110350		39.911	96.9574		0.411634
Cre01.g019600		45.7565	97.2064		0.470715
Cre02.g144750	PTB4	31.2874	100.46		0.311441
Cre16.g693601		44.0877	101.007		0.436482
Cre16.g676150	MSD3	24.7216	101.775		0.242904
Cre10.g458800		14.9912	101.858		0.147177
Cre17.g715500		44.54	102.217		0.43574
Cre12.g536100	FAP126	49.3917	102.403		0.482327
Cre02.g089950	IFT20	34.1123	104.921		0.325124
Cre03.g179941		46.1489	105.194		0.438703
Cre09.g395950	AOX1	45.9696	106.191		0.432895
Cre03.g189350		39.3555	106.978		0.367884
Cre03.g194750		37.7739	107.033		0.352918
Cre03.g190850	ECH1	42.517	107.084		0.397043
Cre17.g704600		46.1545	109.32		0.422196
Cre02.g081700		5.37226	113.853		0.0471859
Cre07.g351650	FAP20	55.8602	116.782		0.478329
Cre09.g393765	LMR1	50.0394	117.555		0.425668
Cre02.g097800		11.6508	117.56		0.0991051
Cre10.g456050		55.5104	118.516		0.468379
Cre17.g696850		58.3357	121.003		0.482101
Cre06.g281600	LCI23	16.1027	124.817		0.12901
Cre06.g278143		29.4871	125.227		0.235469
Cre03.g197500	MOT6	49.1443	125.52		0.391526
Cre08.g367550	FAP291	38.4859	127.447		0.301976
Cre03.g172500	PTO2	49.4154	127.517		0.38752
Cre17.g723750		63.2751	127.905		0.494704
Cre07.g328750		56.93	128.26		0.443864
Cre11.g467531	FAP15	40.0524	133.438		0.300157
Cre09.g390050	MCP1	52.0931	134.375		0.38767
Cre10.g458450	GPX5	57.9197	137.344		0.421713
Cre11.g467710	VSP1	53.1012	139.149		0.381614
Cre05.g235950		8.17223	139.532		0.0585689
Cre06.g308950		63.7085	142.003		0.448642
Cre09.g397660		38.8463	145.868		0.266311
Cre03.g189250		75.0107	147.428		0.508795
Cre08.g367500	LHCSR2	18.0028	149.683		0.120273
Cre03.g183300		55.7795	157.733		0.353632
Cre05.g232600		78.8095	157.827		0.499341
Cre17.g725500		52.2754	163.827		0.319089
Cre04.g225650		67.8314	168.022		0.403705
Cre09.g401886		80.1962	172.184		0.465759
Cre09.g391726		41.1106	179.079		0.229567
Cre48.g761147		81.0601	182.726		0.443616
Cre02.g083800		44.0945	186.557		0.236359
Cre09.g387171		76.6075	189.502		0.404257
Cre17.g708750		26.1085	195.774		0.13336
Cre12.g512300		1.90529	196.105		0.00971566
Cre03.g162800	LCI1	96.8419	203.794		0.475195
Cre06.g271900		11.2275	209.573		0.0535732
Cre36.g759747		15.6172	223.056		0.0700147
Cre17.g746997	ADH1	104.431	233.582		0.447085
Cre10.g424550		121.112	242.41		0.499616
Cre09.g394065		105.191	245.398		0.428655
Cre10.g425850		11.456	255.427		0.0448504
Cre13.g586300	FKB12	132.188	267.336		0.494464
Cre16.g657650	FAP35	97.971	269.331		0.363757
Cre04.g223300	CCP1	70.639	269.522		0.26209
Cre12.g551800		88.4764	281.187		0.314653
Cre12.g550702	TEF13	43.8162	287.218		0.152554
Cre09.g395213		115.273	290.255		0.397144
Cre12.g544450		2.27168	301.705		0.00752947
Cre03.g160300		149.412	311.185		0.480139
Cre13.g563100		160.044	341.352		0.468853
Cre08.g367400	LHCSR3	21.4429	341.838		0.0627283
Cre06.g309000	NAR1.2	94.8476	369.976		0.256361
Cre10.g433950		151.929	371.98		0.408433
Cre12.g510050	CTH1	68.3792	373.709		0.182974
Cre01.g013350		174.331	388.929		0.448233
Cre01.g006950	FBA1	156.811	394.283		0.397712
Cre12.g485150	GAP1	179.116	405.967		0.441208
Cre12.g494850	ADK3	210.058	415.828		0.505156
Cre13.g565800	UPT1	208.129	455.79		0.456634
Cre05.g248450	CAH5	76.395	465.742		0.164029
Cre12.g542250	TUB1	302.31	610.843		0.494906
Cre03.g181150	FLA14	365.091	724.379		0.504005
Cre05.g248400	CAH4	133.396	809.7		0.164747
Cre07.g335200		343.541	858.898		0.399979
Cre10.g452350		473.519	929.329		0.509528
Cre03.g203850	ATS1	540.244	1076.28		0.501955
Cre06.g283950	LHCBM4	771.79	1559.04		0.495042
Cre16.g659700		913.006	1797.35		0.507973
Cre17.g701650	RPL27	1271.14	2487.1		0.511093
Cre07.g323800		718.778	2572.22		0.279439
Cre01.g010900	GAP3	1323.6	2600.54		0.508971
Cre06.g272650	LHCA8	1522.96	3193.59		0.47688
Cre01.g007051		1625.18	3272.59		0.496604
Cre06.g257150	RPL37a	4067.64	10034.8		0.405353
higher transcript abundance in CRR1
Cre01.g022100		9.51672	4.21737		2.25655
Cre13.g581801		9.51985	4.80817		1.97993
Cre03.g162150		9.52046	4.79196		1.98676
Cre16.g651350		9.53114	4.70918		2.02395
Cre14.g628500		9.60452	4.64863		2.0661
Cre17.g725750		9.62821	2.13387		4.51209
Cre09.g402997		9.63207	3.23298		2.97932
Cre09.g390800		9.63832	2.97446		3.24036
Cre09.g394621		9.67551	3.15868		3.06315
Cre17.g697300		9.68026	3.83683		2.52298
Cre14.g628237		9.77208	4.29379		2.27586
Cre05.g244000		9.77476	1.45164		6.7336
Cre16.g655200	PTB6	9.77849	4.25142		2.30005
Cre08.g361551		9.8167	3.05804		3.21013
Cre01.g031300		9.8283	4.31706		2.27662
Cre13.g574500	FER2	9.83576	1.82754		5.38197
Cre01.g004157		9.90662	4.13937		2.39327
Cre12.g500450		9.95694	4.70093		2.11808
Cre04.g225200		10.0481	3.78348		2.65578
Cre13.g580100		10.108	4.85738		2.08096
Cre11.g468350		10.1737	4.46837		2.27683
Cre14.g611750		10.1809	5.00842		2.03276
Cre08.g365600		10.1875	4.86924		2.09222
Cre06.g304550		10.1975	4.42613		2.30393
Cre07.g346250		10.2256	3.49504		2.92575
Cre17.g720550		10.2475	3.22642		3.17612
Cre06.g287950		10.2784	2.89692		3.54804
Cre17.g707150		10.3274	4.90735		2.10448
Cre10.g437000		10.3735	4.9066		2.11419
Cre16.g678550		10.3976	4.29658		2.41997
Cre16.g659600		10.4069	5.28294		1.96991
Cre09.g406400	CTP3	10.4168	4.37492		2.38103
Cre07.g342700		10.4311	2.35497		4.4294
Cre09.g407050		10.4523	0.406276		25.7271
Cre09.g403071		10.4974	1.20881		8.68408
Cre04.g224826		10.5297	5.14164		2.04793
Cre05.g232004		10.5601	4.36301		2.42037
Cre02.g074800	CYG9	10.6825	1.39466		7.65957
Cre08.g361250		10.6893	5.10704		2.09305
Cre12.g485250		10.6924	1.46676		7.28981
Cre09.g400000		10.6927	4.41209		2.4235
Cre12.g548500		10.7384	2.52358		4.25522
Cre01.g015600		10.7634	4.96242		2.16898
Cre17.g714900	CGL11	10.7993	0		#DIV/0!
Cre03.g156800		10.8068	5.34976		2.02005
Cre01.g034850		10.8111	2.87023		3.76663
Cre06.g261200		10.8407	5.46808		1.98254
Cre02.g109100	PDE23	10.8561	4.14788		2.61726
Cre15.g635950		10.904	4.75371		2.29379
Cre10.g425450		10.9539	5.17399		2.11711
Cre03.g144987		10.9967	4.87503		2.25572
Cre12.g536900		11.0911	4.75397		2.33302
Cre04.g219050	SRR10	11.0939	1.91447		5.79476
Cre09.g406416		11.1134	3.5543		3.12675
Cre08.g364501		11.1447	4.92244		2.26406
Cre03.g193500		11.203	5.13153		2.18317
Cre10.g447800		11.2077	2.02141		5.5445
Cre02.g093750	NRX2	11.2616	1.92766		5.84211
Cre09.g400553	TOR1	11.4263	4.83942		2.36109
Cre07.g330900		11.4331	2.94086		3.88767
Cre01.g062172	HBV1	11.4561	5.73744		1.99673
Cre03.g191900		11.5253	4.51825		2.55083
Cre01.g031650	CGLD12	11.5334	3.12875		3.68626
Cre11.g467712		11.5483	4.22829		2.7312
Cre04.g222950		11.5831	5.92791		1.95399
Cre02.g142600		11.5998	5.70086		2.03475
Cre16.g649800		11.6006	3.8601		3.00526
Cre16.g652200	MMP9	11.6741	1.59573		7.31584
Cre12.g518400		11.7279	3.4134		3.43584
Cre13.g585050		11.7686	0.640282		18.3803
Cre04.g222600		11.8734	4.68888		2.53225
Cre12.g496200		11.9287	6.10936		1.95253
Cre14.g617950		11.9376	5.34004		2.23549
Cre06.g267700	SPP2	11.9619	5.12132		2.33571
Cre09.g395400		12.0312	5.59505		2.15033
Cre16.g654550		12.0818	6.08077		1.98689
Cre06.g297016		12.105	6.0999		1.98446
Cre03.g151500		12.1121	4.10219		2.95259
Cre16.g650350		12.1288	5.00038		2.42558
Cre07.g355550		12.1301	5.47466		2.21568
Cre05.g248550		12.1575	4.40119		2.76232
Cre09.g397550		12.1579	2.91625		4.16902
Cre09.g400590		12.2209	1.99083		6.1386
Cre16.g670850		12.2246	3.2629		3.74654
Cre03.g193250		12.2324	5.14019		2.37976
Cre01.g012200		12.2471	5.34753		2.29023
Cre17.g733150		12.2476	5.93175		2.06475
Cre03.g175050	TRP13	12.2691	0.948395		12.9367
Cre09.g391150		12.2861	3.02995		4.05489
Cre03.g144224		12.3436	5.66329		2.17958
Cre07.g337200		12.4086	5.67516		2.18648
Cre09.g413050		12.4813	4.26255		2.92813
Cre03.g172250		12.5169	5.09331		2.45752
Cre11.g467632		12.5252	2.93143		4.27273
Cre17.g714800	ISG-C3	12.5763	0.0511111		246.058
Cre13.g585450		12.61	5.07019		2.48709
Cre15.g641750		12.6154	3.62945		3.47584
Cre07.g344050		12.7653	5.86245		2.17747
Cre06.g271200		12.8158	5.92673		2.16237
Cre01.g052601		12.8233	3.53968		3.62273
Cre02.g100450	CYG20	12.8531	3.20269		4.01322
Cre10.g429000		12.864	2.52937		5.08585
Cre16.g651400		12.9015	6.36027		2.02845
Cre16.g694500		12.9166	4.16361		3.10226
Cre05.g239300		12.9447	5.94268		2.17826
Cre04.g229948		12.9462	6.27544		2.06299
Cre03.g175100		13.0006	3.9358		3.30317
Cre09.g403182		13.0516	6.46028		2.02028
Cre07.g339000		13.0735	5.96545		2.19154
Cre10.g429350		13.2068	4.22072		3.12904
Cre01.g070932		13.2975	5.19826		2.55807
Cre07.g325718		13.3752	4.95461		2.69955
Cre17.g698233		13.3976	3.99933		3.34996
Cre12.g530400	IRT1	13.4179	3.11314		4.31009
Cre03.g177800		13.4581	0.844129		15.9432
Cre13.g569700		13.4595	5.52459		2.43629
Cre14.g609350		13.4767	4.93586		2.73037
Cre07.g353250		13.5606	5.82583		2.32767
Cre01.g053250		13.597	6.49636		2.09302
Cre14.g615550		13.6107	5.15627		2.63964
Cre12.g543902		13.6535	6.04227		2.25966
Cre12.g492200		13.7532	6.10619		2.25234
Cre02.g092250		13.8617	5.72749		2.42021
Cre07.g334900		13.9188	6.88962		2.02026
Cre06.g269300		13.9362	4.20758		3.31217
Cre03.g157600		13.9477	5.93189		2.35131
Cre17.g697406		13.9527	4.68513		2.97808
Cre11.g481104		14.0252	3.77074		3.71948
Cre16.g675000	UPS2	14.1207	6.0381		2.3386
Cre16.g675100		14.1225	4.81623		2.93227
Cre04.g224800		14.1363	7.16213		1.97376
Cre06.g306000	GOX3	14.2134	7.27028		1.955
Cre11.g481115		14.2853	6.77407		2.10882
Cre17.g721000		14.4113	7.37633		1.95372
Cre13.g562650		14.4427	6.74587		2.14097
Cre09.g402738		14.4522	0.868121		16.6477
Cre05.g239350		14.6247	6.49374		2.25212
Cre13.g607100	CYG6	14.6299	5.46504		2.677
Cre01.g003508		14.6705	2.66625		5.5023
Cre06.g274700		14.682	6.75607		2.17316
Cre07.g335950		14.7522	6.59139		2.2381
Cre13.g604300		14.7632	7.45471		1.98039
Cre17.g723350	SUL2	14.9205	0.815138		18.3043
Cre12.g547650		14.9701	5.26836		2.84151
Cre06.g278204		15.0565	5.35832		2.80993
Cre07.g331250		15.1171	7.71327		1.95988
Cre15.g637150		15.1705	6.37985		2.37788
Cre12.g507900		15.234	4.83859		3.14844
Cre13.g579582		15.2926	4.4592		3.42945
Cre17.g706400		15.342	7.399		2.07352
Cre16.g684900		15.3585	6.68214		2.29844
Cre01.g054350		15.4024	5.48602		2.80757
Cre17.g713000		15.4138	6.67247		2.31006
Cre09.g398993	HPD1	15.4588	6.92523		2.23224
Cre13.g586700		15.5404	5.88269		2.64172
Cre12.g513350		15.5478	7.70201		2.01867
Cre03.g193100		15.5512	5.74255		2.70807
Cre04.g228150		15.6173	6.51999		2.3953
Cre14.g616700		15.8596	8.06265		1.96705
Cre10.g451350		15.9128	6.82156		2.33272
Cre14.g623050		15.9695	6.12916		2.6055
Cre12.g552850	CGL77	15.986	6.86727		2.32785
Cre17.g720950		15.9929	6.18167		2.58715
Cre09.g412150		16.0941	6.86166		2.34551
Cre01.g036600		16.1414	7.76077		2.07987
Cre03.g170850		16.1676	4.58627		3.52522
Cre06.g300650		16.2873	8.15928		1.99617
Cre11.g482952		16.2976	5.37202		3.03379
Cre15.g635650		16.6358	6.22284		2.67335
Cre17.g716650		16.6502	7.9404		2.0969
Cre13.g562526		16.857	8.43756		1.99785
Cre14.g628000		16.8665	5.42779		3.10743
Cre10.g445600		16.9743	7.87581		2.15524
Cre07.g352800		17.0489	4.75463		3.58575
Cre07.g355150	ZRT5	17.1445	5.16929		3.31661
Cre11.g469600		17.1817	6.65232		2.58281
Cre06.g274550		17.2246	8.32687		2.06856
Cre17.g721850	SSA16	17.2925	6.58198		2.62725
Cre16.g689535		17.3109	6.06312		2.85511
Cre17.g718400		17.4158	1.13595		15.3315
Cre07.g340450		17.4706	7.72423		2.26179
Cre06.g249750		17.5279	6.99415		2.50608
Cre05.g233300		17.6391	9.03617		1.95205
Cre02.g146000		17.7411	6.39733		2.7732
Cre07.g319500		17.7771	5.64731		3.14789
Cre01.g053150	GPD3	17.778	3.11566		5.70601
Cre02.g095087		17.8331	1.33607		13.3474
Cre03.g151950	LZY1B	17.8782	1.46413		12.2108
Cre14.g612633		17.9356	5.99169		2.99341
Cre12.g524450	PTP3	17.9728	8.76513		2.05049
Cre11.g467540		17.9903	0.806872		22.2963
Cre09.g389050	CNX5	17.9908	0.614409		29.2815
Cre19.g750647		18.1635	7.80368		2.32756
Cre12.g533351		18.1896	7.13104		2.55076
Cre17.g718468		18.3051	1.99305		9.18447
Cre04.g217907		18.3071	6.72519		2.72217
Cre09.g393750		18.3725	9.20362		1.99623
Cre09.g407373		18.3759	4.75664		3.86321
Cre03.g203569		18.3876	0.236966		77.5959
Cre02.g074900		18.5578	8.36033		2.21974
Cre01.g011100		18.5863	9.07321		2.04848
Cre14.g617350		18.6463	9.29882		2.00523
Cre03.g196150		18.6484	9.43013		1.97753
Cre12.g488450	VSP3	18.6574	2.96866		6.28479
Cre12.g497350		18.7144	7.11762		2.62931
Cre10.g428750		18.7231	7.16279		2.61394
Cre02.g142100		18.7708	6.87174		2.73159
Cre17.g722616		18.8486	8.19139		2.30103
Cre17.g722250		18.8625	8.2128		2.29672
Cre08.g371751		18.901	8.98354		2.10396
Cre02.g096700		19.0146	7.38526		2.57467
Cre08.g374150		19.0942	7.48477		2.55107
Cre02.g090050	FAP170	19.155	8.64749		2.21509
Cre06.g270050		19.2296	2.49376		7.71109
Cre10.g450879		19.3302	9.17137		2.10767
Cre09.g405950		19.3398	0.489074		39.5437
Cre09.g410150		19.4352	0.326735		59.4831
Cre09.g402960		19.6395	8.05657		2.4377
Cre14.g617600	DEG9	19.6744	9.82489		2.00251
Cre08.g375650		19.9015	9.41053		2.11481
Cre02.g096601		19.9715	9.79165		2.03965
Cre16.g693203		20.3847	6.89984		2.95437
Cre06.g287350		20.4147	9.55004		2.13766
Cre11.g482450		20.4398	10.1481		2.01415
Cre11.g478100		20.5821	10.192		2.01944
Cre12.g498500	DEG11	20.617	6.70118		3.07662
Cre08.g370601		20.7584	10.5117		1.97479
Cre11.g469350		20.905	8.60518		2.42935
Cre17.g714950		21.0736	0		#DIV/0!
Cre01.g008550		21.1914	10.1776		2.08216
Cre17.g729050		21.1993	10.6416		1.99212
Cre17.g720400	HMA1	21.2854	5.42155		3.92607
Cre11.g481050		21.3679	10.1186		2.11174
Cre17.g739426		21.3688	10.5833		2.01911
Cre01.g004700		21.6198	9.17223		2.35709
Cre17.g723400		21.6552	2.59362		8.34941
Cre14.g627488		21.6644	8.04899		2.69157
Cre01.g012350		21.6893	9.03116		2.40161
Cre06.g284550		21.7933	7.7484		2.81262
Cre04.g217951	LCI33	21.8544	3.40965		6.40957
Cre01.g045640		22.0343	10.7536		2.04902
Cre09.g416850		22.088	7.6966		2.86984
Cre17.g706650	VPS22	22.1722	6.62963		3.34441
Cre06.g290150	CGL65	22.3116	10.3167		2.16267
Cre02.g099550		22.3272	7.4339		3.00343
Cre09.g391652		22.4095	11.3675		1.97137
Cre07.g325740	PTB3	22.8239	3.19105		7.15247
Cre17.g699750	CTL2	23.0207	9.15174		2.51545
Cre01.g008650		23.0806	4.16043		5.54765
Cre03.g179921		23.3681	11.7054		1.99635
Cre09.g400950		23.5148	9.5256		2.46859
Cre06.g259100		23.604	6.45319		3.65773
Cre17.g717950		23.7867	9.2906		2.5603
Cre09.g404750	SRR2	23.7986	0.667143		35.6724
Cre04.g228100		23.9174	10.0779		2.37325
Cre15.g643750		24.4367	10.0164		2.43967
Cre04.g211600		24.6173	9.90942		2.48423
Cre16.g681351		24.9723	12.1221		2.06006
Cre15.g635067		24.986	12.7545		1.95899
Cre16.g681251		25.0183	4.82373		5.18651
Cre17.g713260		25.379	11.3916		2.22787
Cre04.g224200		25.8287	11.8873		2.1728
Cre06.g273413		26.1349	11.4501		2.2825
Cre12.g528050		26.5432	13.321		1.99258
Cre01.g023300		26.55	11.508		2.30709
Cre03.g152250		26.8407	9.8306		2.73032
Cre02.g095130		26.8967	13.6334		1.97285
Cre01.g049826		27.2151	4.53958		5.99507
Cre17.g735350	FAP164	27.3088	13.5761		2.01153
Cre06.g304600		27.948	12.8533		2.17438
Cre14.g617400	HSP22F	27.9909	11.4241		2.45016
Cre05.g234661	BCS1	28.3075	11.2949		2.50622
Cre03.g148950		28.4488	13.3936		2.12406
Cre16.g693400		28.4951	10.2629		2.77652
Cre12.g551050		28.8309	14.5635		1.97967
Cre09.g408464		28.8313	10.856		2.65579
Cre13.g588650		28.8331	12.9653		2.22387
Cre04.g232502		29.0052	9.30912		3.11578
Cre26.g756747		29.0189	10.426		2.78332
Cre16.g696000		29.0529	13.9596		2.08121
Cre10.g463370		29.1395	11.8219		2.46487
Cre17.g726850		29.4405	14.9		1.97587
Cre17.g730100	RSE1	29.6359	5.27094		5.62251
Cre09.g413075		29.8337	14.4907		2.05882
Cre06.g309450		30.2831	13.2153		2.29152
Cre06.g270350	AMB2	30.3105	14.7438		2.05581
Cre17.g722500		30.5138	15.5128		1.96701
Cre16.g687000		30.5611	14.727		2.07517
Cre13.g578650		30.7555	13.0389		2.35875
Cre01.g003516		31.2757	11.5363		2.71107
Cre06.g258100		31.5975	15.4759		2.04172
Cre06.g261150	BIO2	31.6667	12.5181		2.52967
Cre01.g027575		31.6971	15.4006		2.05817
Cre09.g405750	CAH8	31.7986	6.07632		5.2332
Cre09.g389250	AOF1	32.0148	11.4631		2.79286
Cre12.g558450	SPD1	32.1523	12.8044		2.51104
Cre16.g693202		33.0412	16.7564		1.97186
Cre02.g078100		33.2546	9.89668		3.36018
Cre05.g248200		33.6583	10.3648		3.24737
Cre09.g393100		33.9687	5.26567		6.45097
Cre06.g250902		34.0175	15.1436		2.24633
Cre03.g176833		34.1607	8.0837		4.22587
Cre06.g281450	SRR22	34.1633	3.5173		9.71293
Cre16.g677750		34.7625	12.9533		2.68368
Cre17.g723500		35.1947	6.49399		5.41958
Cre13.g575400		35.2907	14.6992		2.40086
Cre10.g458850		35.3047	10.6321		3.32058
Cre03.g162750		35.5394	14.1483		2.51192
Cre17.g719750		35.624	14.5763		2.44397
Cre06.g278255		35.9624	17.2119		2.08939
Cre09.g396550		36.0968	15.7224		2.29588
Cre16.g659850	CGL37	36.2708	18.3574		1.97581
Cre18.g749547		36.746	4.00544		9.17402
Cre03.g179500		36.8869	0.557579		66.1555
Cre17.g740323		37.0581	14.0976		2.62868
Cre02.g074150	COP5	37.2288	17.3631		2.14413
Cre03.g198250		37.3638	3.40443		10.9751
Cre09.g402923		37.9608	19.2902		1.96788
Cre17.g732300	GAL1	38.3426	19.0399		2.0138
Cre10.g436350	SHK5	38.3778	17.7296		2.16462
Cre16.g656750		38.9871	5.33018		7.31441
Cre12.g488800		39.6352	1.61686		24.5137
Cre09.g398400	TRP5	39.6543	1.36207		29.1133
Cre09.g396438		39.8035	3.79067		10.5004
Cre12.g485600		40.2881	9.83848		4.09495
Cre14.g630871		40.815	0.676466		60.3356
Cre06.g281900	ZIP7	40.8804	17.883		2.28599
Cre01.g036950		40.9564	15.7591		2.5989
Cre16.g675300		41.4104	17.1078		2.42056
Cre05.g241400		41.6314	16.7979		2.47837
Cre11.g481500	HIS7	41.6705	15.5782		2.67492
Cre16.g674700		42.0006	20.3453		2.06439
Cre19.g751047		42.2408	7.15873		5.9006
Cre03.g171950		43.077	21.6589		1.98888
Cre09.g398289		43.2397	22.1587		1.95136
Cre17.g717100		44.5823	20.5547		2.16896
Cre12.g537100		44.8034	18.7565		2.38869
Cre13.g585301		44.8196	19.0068		2.35808
Cre02.g096300	CCM1	46.0427	21.2775		2.16391
Cre07.g329100		47.0537	22.8704		2.05741
Cre02.g106450		47.7911	6.64771		7.18911
Cre14.g616100		47.9772	24.1935		1.98306
Cre12.g507150		47.9849	19.3609		2.47844
Cre16.g649300		48.0058	15.5613		3.08495
Cre04.g217550	EIF3C	48.0415	23.7211		2.02526
Cre14.g617450	HSP22E	48.4544	11.2226		4.31757
Cre12.g512400		48.5666	13.8534		3.50575
Cre10.g466000		48.6638	14.2717		3.40981
Cre16.g681250		48.802	9.38547		5.19974
Cre08.g372000	CGLD11	49.1419	21.7304		2.26144
Cre09.g410050		49.5078	10.5628		4.687
Cre18.g748347		50.1814	1.227		40.8976
Cre03.g200350		50.357	23.8539		2.11106
Cre14.g609500		50.6717	13.315		3.80561
Cre02.g095076	MFT10	50.6816	10.212		4.96295
Cre05.g234100		50.8932	17.2601		2.9486
Cre10.g430501		51.0733	22.1839		2.30227
Cre13.g570600	CTR1	51.2155	5.03142		10.1791
Cre10.g426500		51.3732	25.0711		2.0491
Cre09.g398250		51.7078	3.2784		15.7723
Cre10.g452000		52.0376	19.0581		2.73047
Cre13.g604000		52.6925	14.5522		3.62093
Cre01.g029650	VPS35	53.2803	26.2292		2.03134
Cre06.g303200		53.8885	16.0384		3.35997
Cre01.g000150	ZRT2	54.4967	0.546165		99.7807
Cre06.g295400		54.5108	17.7375		3.0732
Cre12.g534250		55.4284	23.9555		2.31381
Cre02.g107550		55.4595	24.9356		2.22411
Cre09.g389652		56.8599	27.5809		2.06157
Cre05.g242859		56.8725	28.4294		2.00048
Cre09.g399400		57.1305	1.40531		40.6533
Cre01.g048150		57.282	26.8512		2.13331
Cre06.g299150	PHC9	57.9499	29.4876		1.96523
Cre02.g085900		59.5674	26.1559		2.2774
Cre14.g627433		60.1721	24.4994		2.45606
Cre01.g005850		60.2685	22.1796		2.71729
Cre11.g467551		61.3504	26.681		2.2994
Cre06.g251500	SPS1	61.5739	29.5764		2.08186
Cre14.g629600		62.1729	11.6251		5.34816
Cre07.g355600	NTR3	62.7966	23.2074		2.70589
Cre18.g748097		62.8301	1.4278		44.0048
Cre09.g390023	CRR1	63.4009	14.9218		4.24888
Cre02.g089500		63.5799	9.02902		7.04173
Cre17.g696250		64.4337	31.0526		2.07499
Cre03.g185250	SSS2	65.3222	27.4817		2.37693
Cre16.g695100		65.3271	32.2213		2.02745
Cre14.g629650	NIK1	65.3315	19.1821		3.40586
Cre12.g547300		66.2927	32.3722		2.04783
Cre16.g693819		67.186	22.524		2.98286
Cre17.g722750		67.3537	28.8857		2.33173
Cre10.g441200		67.4527	29.7459		2.26763
Cre01.g016514		67.5634	20.7772		3.2518
Cre09.g402950	CGL21	67.9168	28.0215		2.42374
Cre02.g144350		68.2748	22.7261		3.00425
Cre09.g393700	MMP3	68.4464	15.3263		4.46594
Cre04.g228950		69.4077	13.619		5.09639
Cre03.g167850		70.0141	29.0722		2.40828
Cre12.g530350	IRT2	70.0713	8.82088		7.9438
Cre06.g278170	FAS7	70.6742	33.5828		2.10448
Cre07.g326150		71.2713	33.3514		2.13698
Cre17.g734300		71.466	31.8279		2.24539
Cre05.g238687		71.6267	19.9486		3.59056
Cre07.g339700	SUF3	71.7756	33.6399		2.13364
Cre16.g663950		72.7268	28.4559		2.55577
Cre17.g705100		72.776	26.4072		2.75592
Cre04.g219925		73.1615	33.3615		2.19299
Cre02.g092350		73.3778	27.3077		2.68707
Cre17.g734644		73.543	17.598		4.17905
Cre01.g021251		73.986	33.8203		2.18762
Cre14.g628100	SPL7	74.206	31.0739		2.38805
Cre03.g156050		74.3222	36.919		2.01312
Cre13.g588150		76.0837	22.6091		3.36518
Cre05.g238650	PHC5	76.3039	18.6963		4.08123
Cre16.g652000		77.9456	13.7313		5.67649
Cre09.g392319	VSP6	78.9673	25.7797		3.06316
Cre15.g634750		79.4282	34.8895		2.27656
Cre08.g373100		79.9339	32.619		2.45053
Cre06.g289500		81.1886	36.2151		2.24184
Cre05.g237050	CGLD27	83.2475	31.8365		2.61484
Cre02.g084400		85.0024	6.32683		13.4352
Cre06.g261800	PRD1	85.2172	42.0224		2.0279
Cre02.g143000		85.7627	40.5532		2.11482
Cre10.g439700	CGL28	86.9368	27.6564		3.14346
Cre07.g339750	HEM2	87.4729	39.6483		2.20622
Cre05.g241636		87.5835	21.1217		4.14661
Cre16.g650600	MST1	87.8066	44.5803		1.96963
Cre09.g398500		89.5787	2.52621		35.4597
Cre18.g748297		92.2892	2.14853		42.9546
Cre16.g662550		92.7285	45.1629		2.0532
Cre10.g434350	CTR2	94.887	0.46884		202.387
Cre21.g752647		95.7095	34.4765		2.77608
Cre04.g227400	FRE1	98.6887	43.2448		2.28209
Cre11.g479900		100.328	41.3144		2.4284
Cre05.g248300		103.338	28.5929		3.61411
Cre17.g718500	GLE1	105.745	25.8075		4.09745
Cre12.g507800		107.066	6.64307		16.1169
Cre01.g009900	CDJ3	111.102	55.3019		2.00901
Cre11.g467527		119.373	31.7622		3.75834
Cre02.g086300		120.472	40.799		2.95282
Cre09.g392867	FMG1-B	122.714	25.4126		4.82886
Cre09.g393650		126.985	64.8404		1.95842
Cre08.g379650	TIC20	127.377	65.0694		1.95756
Cre10.g463350	HRP3	127.843	57.7705		2.21295
Cre09.g405100		128.762	3.71885		34.6241
Cre13.g566000		134.977	56.0112		2.40982
Cre02.g084450		137.192	12.0704		11.366
Cre01.g047800	GRX6	142.197	42.7836		3.32363
Cre16.g657250	GOX17	146.548	6.3663		23.0193
Cre02.g077800		151.817	50.1476		3.0274
Cre08.g366000		159.086	69.956		2.27409
Cre14.g613800		162.836	9.34527		17.4244
Cre05.g237450	PSRP1	165.167	82.0003		2.01422
Cre12.g534800	GCSP	176.752	86.3981		2.04579
Cre12.g557600	ADK4	193.527	53.6134		3.60968
Cre43.g760497		197.428	63.4359		3.11224
Cre13.g580850		198.969	100.871		1.97251
Cre03.g183850	FDX6	203.926	74.4771		2.7381
Cre09.g398450		207.648	8.29682		25.0274
Cre09.g397250		209.078	96.2553		2.17212
Cre10.g433600		212.242	76.1137		2.78849
Cre10.g434650	CTR3	216.239	6.97281		31.0117
Cre16.g657200		225.005	7.15083		31.4656
Cre48.g761197		232.792	113.882		2.04415
Cre03.g146447		240.518	48.0182		5.00889
Cre06.g293950	SHMT2	246.712	97.1528		2.53942
Cre10.g423650	PRPL11	268.565	130.184		2.06296
Cre07.g325734		296.383	139.645		2.1224
Cre10.g443050		302.693	39.0135		7.75867
Cre12.g546500	TEF22	324.443	108.677		2.98539
Cre12.g519180		341.109	157.54		2.16522
Cre06.g259850	PRPL29	342.583	164.349		2.08448
Cre17.g712100		342.91	76.4146		4.48749
Cre07.g321400	FAP113	357.164	104.243		3.42626
Cre02.g081050	FAP24	365.989	126.944		2.88307
Cre02.g088900	PRPL1	371.974	113.771		3.2695
Cre09.g393150	FOX1	378.953	138.872		2.72879
Cre03.g192050	FTR1	401.648	138.568		2.89856
Cre07.g346850		404.327	4.29333		94.1756
Cre24.g755997	PHC18	406.019	1.70948		237.51
Cre05.g236039		461.979	19.0068		24.306
Cre07.g352850	PRPL32	469.27	237.583		1.97518
Cre17.g701700		528.037	121.601		4.34237
Cre12.g490500	CGL78	541.872	69.7177		7.77237
Cre10.g452800	LCIB	571.02	278.701		2.04886
Cre03.g199800	HYDA1	582.628	144.244		4.03918
Cre12.g546600	FEA2	631.498	134.334		4.70095
Cre02.g085450	CPX1	776.067	129.348		5.99984
Cre13.g581650	PRPL7	826.575	396.877		2.0827
Cre07.g346050	CRD1	827.143	63.3417		13.0584
Cre07.g336800		837.162	254.508		3.28933
Cre10.g452250		859.102	23.3577		36.7802
Cre07.g346950		935.236	1.91876		487.417
Cre09.g387800	FER1	983.935	434.95		2.26218
Cre03.g204250	SAH1	1206.02	480.358		2.51067
Cre16.g651050	CYC6	1279.65	0		#DIV/0!
Cre01.g029700		1570.56	29.6352		52.9964
Cre17.g700950	FDX5	1732.8	0.782322		2214.94
Cre08.g372200		1840.74	88.9204		20.701
Cre07.g346900		1929.22	10.7857		178.868

## Sheet: hypoxia
Supplemental Table 2.
Differentially accumulated transcripts from from the pairwise comparison of transcript abudance from cells collected prior to (0h) and after 6h of growth under dark anoxic conditions. FPKM values resulted from realigning reads from Hemschemeier, Anja, et al. "COPPER RESPONSE REGULATOR1–dependent and–independent responses of the Chlamydomonas reinhardtii transcriptome to dark anoxia." The Plant Ce…
	FPKM							Fold change
	hypoxia
	crr1		CRR1		CRR1(Δcys)			6h hypoxia / 0h hypoxia
gene	6h	0h	6h	0h	6h	0h		crr1	CRR1	CRR1(Δcys)
higher transcript abundance in CRR1 after 6h of anoxic conditions vs. 0h
Cre01.g006550	0	0	13.8116	0	0	0		inf.	inf.	inf.
Cre10.g443550	0	0	16.6792	0	0	0		inf.	inf.	inf.
Cre16.g661200	83.5677	0	19.5378	0.0150672	49.2774	0		inf.	1296.71	inf.
Cre17.g700950	0.0975424	0.450677	1118.51	1.47278	27.413	1.19007		0.216435	759.455	23.0348
Cre06.g275350	59.3832	0.637142	76.8568	0.596806	40.2693	0.858049		93.2025	128.78	46.9312
Cre16.g651050	0	0.126197	11.1668	0.0909714	19.6949	30.4038		0	122.751	0.647778
Cre10.g433800	23.7519	0.813911	78.5641	0.836456	10.9829	0.657168		29.1824	93.925	16.7125
Cre02.g093600	3.27951	1.58869	131.728	1.40952	3.92614	2.77524		2.06429	93.4559	1.4147
Cre01.g004750	20.1782	0.436723	30.7059	0.436869	24.9978	0.754886		46.2037	70.2863	33.1147
Cre03.g163950	42.6926	0.550749	32.1528	0.472728	35.4532	1.15669		77.5173	68.0154	30.6506
Cre08.g368850	144.993	0.79045	25.3138	0.479225	81.1374	0.264924		183.431	52.8224	306.267
Cre17.g713700	20.99	0.283955	12.4073	0.251482	14.9926	0.614583		73.9202	49.3367	24.3948
Cre04.g214750	2.93238	0.164508	21.1932	0.439857	4.55943	1.38614		17.8252	48.182	3.2893
Cre02.g084400	4.05639	1.85805	90.8445	1.91344	17.279	0.921972		2.18314	47.4771	18.7414
Cre08.g372200	145.936	41.9201	2392.09	52.8475	2975.99	49.1382		3.48129	45.264	60.5637
Cre02.g087050	2.00069	0.537684	26.8402	0.606275	4.04858	0.343299		3.72094	44.2707	11.7932
Cre16.g677382	97.4219	6.12606	139.988	3.25051	84.3645	5.16122		15.9029	43.0665	16.3458
Cre09.g413200	31.9137	1.60052	35.4651	1.14963	23.2943	1.05349		19.9396	30.8491	22.1116
Cre17.g730450	0.428977	0.55752	13.1751	0.437623	0.643264	0.613417		0.769438	30.1061	1.04866
Cre17.g730100	8.88132	1.50555	36.9802	1.31779	23.4011	1.03527		5.89905	28.0623	22.6039
Cre09.g404250	4.81576	0.654379	15.7217	0.623619	2.91604	0.228172		7.35928	25.2104	12.78
Cre13.g603550	103.583	11.1495	276.161	11.472	93.0951	7.14862		9.29037	24.0726	13.0228
Cre17.g731650	1.67076	0.877184	16.05	0.691352	1.9102	1.25081		1.90469	23.2154	1.52717
Cre13.g568500	26.1593	0.664052	11.6592	0.53951	35.6162	0.516127		39.3935	21.6107	69.0067
Cre06.g297049	17.6174	0.227284	9.65405	0.453715	26.0374	0.290852		77.5127	21.2778	89.5211
Cre03.g191300	51.3956	4.095	64.9617	3.19077	43.0287	2.50134		12.5508	20.3593	17.2023
Cre11.g467540	1.97786	0.571215	23.5209	1.19354	3.27481	0.865669		3.46255	19.7068	3.78298
Cre10.g426152	18.201	1.03671	15.7768	0.818928	19.0241	1.98761		17.5565	19.2652	9.57134
Cre02.g095137	33.7074	3.10342	76.7973	4.32284	44.7719	6.27146		10.8614	17.7655	7.13899
Cre11.g467538	2.3724	0.977138	20.396	1.18878	8.16975	0.755518		2.42791	17.1571	10.8134
Cre16.g657250	143.074	22.6881	288.795	16.854	345.183	16.9492		6.30613	17.1351	20.3657
Cre06.g310950	92.1802	4.72608	71.4875	4.20161	57.0547	7.86444		19.5046	17.0143	7.25477
Cre09.g394325	38.2202	3.52957	39.9794	2.45662	36.0748	4.59461		10.8286	16.2741	7.85155
Cre13.g585050	3.61709	1.47443	28.173	1.74223	156.418	3.30212		2.45321	16.1707	47.369
Cre15.g634650	24.6678	2.08597	20.497	1.28113	18.9091	1.1549		11.8256	15.9992	16.3729
Cre03.g179500	1.57487	0.800938	33.1475	2.11153	30.7858	2.22979		1.96628	15.6983	13.8066
Cre02.g083750	36.6031	2.55333	31.8337	2.08509	26.1409	1.74161		14.3354	15.2673	15.0096
Cre07.g355500	73.4588	10.0169	91.5617	6.38567	62.2165	11.6877		7.33349	14.3386	5.32325
Cre01.g029250	55.7479	4.60984	46.3972	3.32482	39.2137	5.67801		12.0932	13.9548	6.90624
Cre07.g342800	21.8282	1.643	16.6303	1.20592	18.1194	2.67843		13.2856	13.7905	6.76493
Cre16.g686285	18.5871	2.22833	16.1244	1.21511	16.2446	1.38843		8.34127	13.2699	11.7
Cre02.g095151	0.676587	1.12082	13.1672	1.00641	0.796932	0.998887		0.603654	13.0833	0.79782
Cre07.g328800	43.5873	3.97286	46.0811	3.58414	43.4953	9.73153		10.9713	12.8569	4.46952
Cre13.g586450	13.7706	8.05872	126.372	10.0389	13.6568	14.0178		1.70878	12.5882	0.974247
Cre08.g358600	40.3058	4.28211	38.0407	3.10189	34.8466	4.17527		9.4126	12.2637	8.34595
Cre10.g442800	2.02673	0.229542	10.7677	0.904568	12.0985	0.854649		8.82945	11.9037	14.1561
Cre11.g477550	72.1668	14.1599	97.2249	8.19428	56.9176	9.29804		5.09656	11.865	6.12146
Cre02.g118100	51.5972	5.76799	63.1455	5.36864	41.0951	4.7992		8.94544	11.7619	8.56291
Cre14.g610400	8.39516	0.919348	9.92445	0.852904	7.21741	0.938076		9.13165	11.6361	7.69384
Cre06.g311050	25.0727	3.08093	24.9007	2.18265	26.1233	4.15019		8.13803	11.4085	6.29448
Cre17.g734125	5.54224	3.83045	15.7683	1.44462	1.58883	1.28602		1.44689	10.9152	1.23546
Cre16.g657200	147.486	35.169	280.65	25.8183	111.463	28.8646		4.19364	10.8702	3.86158
Cre08.g360801	41.7553	5.49124	58.3734	5.37061	38.3723	7.12285		7.60398	10.869	5.38721
Cre02.g074200	20.8396	2.31297	19.5102	1.81026	14.1054	1.64066		9.00989	10.7776	8.59739
Cre06.g278231	14.2568	0.930504	13.0018	1.21889	9.32745	0.979333		15.3216	10.6669	9.52429
Cre01.g009101	23.3059	2.30941	22.5868	2.12458	17.1722	1.67081		10.0917	10.6312	10.2778
Cre03.g146267	121.364	15.9596	165.709	15.6884	81.5704	FAIL		7.60445	10.5625	n/a
Cre12.g518800	96.746	13.3629	86.474	8.2153	96.3464	15.9327		7.2399	10.526	6.04709
Cre04.g230438	9.99964	1.44763	10.3456	1.01572	6.50332	0.997708		6.90759	10.1855	6.51826
Cre16.g649433	37.4847	3.07229	51.6771	5.12259	24.8005	2.77528		12.2009	10.0881	8.93622
Cre07.g337100	536.991	63.4544	570.571	57.3708	344.665	85.336		8.46263	9.94532	4.03892
Cre16.g668550	18.5461	2.64014	19.8871	2.05545	14.2242	2.92808		7.02467	9.6753	4.85786
Cre03.g145787	19.9134	3.07789	21.2979	2.20309	58.264	6.13151		6.46982	9.66729	9.50239
Cre06.g301750	19.5022	2.60919	19.8137	2.10359	18.3114	2.74567		7.47443	9.41899	6.66919
Cre06.g271900	93.1657	12.4719	75.6851	8.17082	116.294	12.873		7.47005	9.26285	9.03395
Cre03.g203569	1.69798	1.93422	19.6503	2.17593	10.6125	2.80016		0.877863	9.03076	3.78996
Cre06.g283900	34.8025	2.77101	33.4521	3.7149	21.5336	3.19866		12.5595	9.00485	6.73207
Cre02.g146629	14.8944	1.98288	16.0313	1.86683	10.2314	1.71275		7.5115	8.58745	5.97367
Cre16.g668700	34.5401	3.96202	19.6226	2.29821	13.8389	1.5388		8.7178	8.53821	8.99331
Cre09.g409650	111.222	16.3366	101.991	11.9512	81.4194	14.6274		6.80815	8.53395	5.56623
Cre09.g400590	37.0951	6.9192	41.5915	5.09681	19.6376	4.09946		5.36118	8.1603	4.79029
Cre07.g329750	13.3254	4.47433	28.2714	3.49784	10.5831	3.0068		2.97819	8.08253	3.51972
Cre10.g426800	2.45874	4.13413	20.191	2.54252	5.36872	9.55017		0.594742	7.94133	0.56216
Cre03.g146867	5.60927	1.85719	9.57708	1.21926	3.90016	1.33888		3.0203	7.85483	2.913
Cre04.g219851	60.0174	13.1141	69.3149	8.83141	40.0463	9.37832		4.57656	7.84868	4.27009
Cre03.g181200	56.2886	12.2252	48.3067	6.18429	46.4797	11.8794		4.60431	7.8112	3.91263
Cre24.g755597	34.7529	4.81172	28.5378	3.66844	25.6261	5.25932		7.22255	7.77927	4.87251
Cre07.g318800	20.1158	8.9406	23.7206	3.07262	47.6046	2.87217		2.24994	7.71999	16.5744
Cre01.g029700	57.3918	20.6108	252.091	33.0859	114.629	135.64		2.78455	7.61929	0.845097
Cre16.g675100	18.916	3.01017	27.2658	3.58202	15.2903	2.50205		6.28403	7.61185	6.11111
Cre11.g467615	122.047	7.75085	78.5918	10.3412	79.5343	2.94847		15.7463	7.59987	26.9748
Cre12.g539900	16.1564	2.85668	13.6817	1.86206	13.3252	2.83276		5.65566	7.34762	4.70396
Cre09.g396550	35.0459	7.2544	42.3551	5.88576	24.3295	5.06616		4.83099	7.1962	4.80236
Cre05.g232150	166.206	33.7549	168.839	23.6092	98.0082	30.1108		4.92391	7.15141	3.25492
Cre17.g739350	30.7724	3.03249	25.4375	3.55794	32.6044	3.54696		10.1476	7.1495	9.19221
Cre06.g296750	11.0105	3.16837	15.3629	2.15454	8.99062	1.81707		3.47513	7.13048	4.94787
Cre14.g623403	8.00082	2.41336	16.0665	2.27526	6.09565	2.71042		3.31522	7.06139	2.24897
Cre04.g228350	39.0574	7.09375	45.551	6.5259	30.2291	7.98201		5.50589	6.98003	3.78715
Cre12.g498750	12.8237	1.88079	15.2191	2.19652	11.1675	2.01048		6.81825	6.92873	5.55464
Cre11.g467761	36.4243	3.95065	40.7562	5.93207	21.4496	3.33454		9.21982	6.87049	6.43255
Cre03.g185250	132.305	29.4358	133.186	19.4884	109.235	19.6961		4.4947	6.83412	5.54602
Cre03.g160750	9.35564	3.22361	16.753	2.47318	9.27394	3.40873		2.90222	6.77387	2.72064
Cre07.g349650	12.0471	2.09302	11.7803	1.77203	9.67961	2.09904		5.75585	6.64791	4.61145
Cre12.g537750	20.4015	3.76546	20.4127	3.0813	10.72	3.25661		5.41806	6.6247	3.29177
Cre03.g199800	184.291	44.84	342.498	52.5118	874.298	100.967		4.10997	6.52231	8.65925
Cre16.g683200	33.4195	5.44996	22.7432	3.5031	23.3516	5.32927		6.13206	6.49231	4.38176
Cre09.g405750	138.579	22.0866	206.067	32.5561	226.747	28.7634		6.27435	6.3296	7.88318
Cre01.g024050	18.7148	3.46473	20.5168	3.25539	13.6585	3.82299		5.40152	6.30241	3.57273
Cre14.g630787	13.613	2.70712	13.4201	2.13746	11.0122	1.89986		5.02859	6.27853	5.79632
Cre01.g000300	23.393	7.76632	43.2481	7.08076	19.7118	9.06533		3.01211	6.10783	2.17442
Cre02.g091200	26.5013	5.32183	21.1779	3.46774	18.2133	6.12824		4.97973	6.10712	2.97203
Cre01.g041200	10.8392	2.73239	17.1642	2.81977	8.54167	2.4331		3.96693	6.08709	3.51061
Cre06.g270350	49.338	12.646	54.9772	9.03786	31.5608	8.27269		3.90147	6.08299	3.81506
Cre05.g244000	8.44512	1.46634	15.7857	2.62338	7.69398	1.73582		5.75932	6.01731	4.43248
Cre16.g661000	20.5637	5.26727	15.8826	2.6824	15.1344	2.7341		3.90405	5.92104	5.53542
Cre06.g278098	19.4799	5.23133	19.3996	3.29429	13.3488	6.01085		3.7237	5.88886	2.22078
Cre08.g358573	11.9618	3.84857	24.9949	4.2533	7.89251	2.49373		3.10812	5.87659	3.16494
Cre12.g496150	21.7105	3.89995	13.8434	2.35675	21.3196	6.42137		5.56687	5.87394	3.3201
Cre03.g205100	23.0277	4.72539	18.846	3.26379	21.8701	5.09275		4.87319	5.77427	4.29436
Cre07.g346050	25.6083	36.6253	257.852	44.7692	405.511	53.626		0.699197	5.75958	7.56184
Cre02.g102050	74.0027	7.07727	40.4785	7.10086	27.6373	4.49298		10.4564	5.70051	6.15122
Cre17.g707350	114.663	23.4522	114.504	20.2124	123.111	18.8223		4.88922	5.66504	6.5407
Cre01.g013050	19.8003	5.27375	30.9966	5.47261	15.9552	4.76752		3.7545	5.66395	3.34665
Cre02.g095073	97.8176	15.9522	107.907	19.3894	84.9319	19.5463		6.13192	5.56526	4.34517
Cre09.g410450	26.4088	6.91008	35.1749	6.342	22.5235	7.67467		3.82178	5.54634	2.93478
Cre06.g296400	47.44	10.6838	47.7136	8.60967	43.6924	13.1765		4.44037	5.54186	3.31593
Cre06.g296700	81.5492	22.6063	81.1477	14.882	71.9329	12.5925		3.60737	5.45274	5.71236
Cre07.g328000	68.8689	22.3175	115.366	21.1811	133.285	32.1176		3.08587	5.44665	4.14991
Cre17.g707750	119.177	11.7202	64.643	11.9154	84.1101	6.58891		10.1685	5.42516	12.7654
Cre17.g698600	7.45019	2.07603	10.642	1.96689	4.73338	1.77563		3.58867	5.41057	2.66575
Cre02.g085100	11.074	2.96153	15.9663	2.96866	8.18831	2.92253		3.73928	5.37829	2.80179
Cre11.g467533	38.3416	7.80048	27.4704	5.1094	39.7521	6.82026		4.91529	5.37644	5.82853
Cre16.g673100	9.12421	2.25853	11.8046	2.19862	6.06222	2.08571		4.03989	5.3691	2.90655
Cre03.g155250	62.5516	20.0457	59.7148	11.2656	37.5681	10.1134		3.12045	5.30063	3.71469
Cre10.g443050	26.7938	29.5429	291.947	55.7282	1288.62	164.154		0.906945	5.23877	7.85007
Cre05.g240533	10.3231	2.38215	11.2961	2.16676	7.32198	2.17477		4.33352	5.21336	3.36678
Cre05.g236039	23.9379	16.88	161.671	31.0793	173.741	65.9646		1.41812	5.20189	2.63385
Cre07.g335200	972.992	300.064	964.381	185.591	848.326	230.874		3.24261	5.19627	3.67441
Cre17.g716750	46.3841	6.33637	27.2822	5.43267	34.777	5.39582		7.3203	5.02188	6.44517
Cre17.g707700	21.0167	6.52821	28.2638	5.6385	23.4934	7.31048		3.21937	5.01265	3.21366
Cre11.g467532	24.7252	4.12833	16.4542	3.31471	22.7469	4.0388		5.98915	4.96399	5.63209
Cre10.g438850	78.0538	25.4588	101.872	20.5524	58.6581	19.5219		3.06589	4.9567	3.00473
Cre16.g687950	21.9216	4.2423	15.4745	3.13355	18.5784	4.57492		5.16739	4.93833	4.06092
Cre03.g213089	64.8175	10.3181	67.1069	13.5911	43.3692	11.8117		6.28192	4.93756	3.67172
Cre08.g370550	15.249	5.47304	26.0098	5.38663	14.4643	6.39551		2.7862	4.82858	2.26163
Cre01.g039850	11.0908	2.83778	15.1777	3.14344	10.7074	2.81563		3.90827	4.82837	3.80284
Cre05.g230650	20.5683	3.57175	20.4309	4.27431	29.8208	5.25078		5.75861	4.77993	5.67931
Cre11.g467531	105.68	24.73	91.2486	19.1544	98.7	24.7914		4.27335	4.76385	3.98122
Cre17.g699100	44.5297	14.1002	49.2314	10.3831	25.3659	10.6256		3.15809	4.74149	2.38724
Cre12.g517700	26.1915	4.65874	21.5738	4.55161	19.8549	5.2717		5.62201	4.73982	3.76632
Cre11.g467760	20.4325	5.28115	24.8132	5.25465	15.5374	4.70652		3.86895	4.72214	3.30125
Cre09.g409325	15.0609	3.50096	16.5595	3.50688	12.3527	4.64648		4.30193	4.722	2.65851
Cre01.g015400	37.3062	11.221	43.8277	9.41247	24.6685	8.55165		3.32468	4.65634	2.88465
Cre12.g488050	22.5234	3.46539	21.054	4.55019	17.2198	6.25045		6.49953	4.62706	2.75497
Cre07.g320500	16.1379	5.99133	19.4579	4.21576	10.1192	4.14229		2.69354	4.61551	2.4429
Cre12.g541450	20.8616	3.76031	20.3509	4.42562	17.4542	4.13394		5.54784	4.59843	4.22217
Cre14.g620500	75.6276	14.1638	73.2547	16.0721	56.3704	19.1608		5.3395	4.55788	2.94196
Cre08.g378800	84.5892	23.7246	91.7105	20.3397	67.3347	17.1086		3.56546	4.50894	3.93572
Cre10.g458400	48.5809	10.5045	46.7625	10.4156	55.4792	10.7159		4.62477	4.48966	5.17728
Cre04.g216811	18.4716	3.85315	20.3351	4.5329	11.2551	2.66361		4.7939	4.48611	4.22551
Cre16.g677750	29.4502	20.8817	87.9827	19.6345	18.7091	23.3923		1.41034	4.48103	0.799797
Cre03.g193500	14.1148	4.28026	13.8556	3.09209	9.54571	4.44057		3.29765	4.48098	2.14966
Cre12.g558300	19.5857	5.56313	22.2844	4.98132	6.2447	3.93009		3.52063	4.47359	1.58895
Cre03.g200850	11.6511	3.50352	10.4439	2.3354	10.3474	4.4427		3.32554	4.472	2.32908
Cre02.g095076	14.1826	11.1468	48.1629	10.788	13.3553	13.789		1.27235	4.46449	0.968547
Cre11.g468100	14.8567	3.17264	16.409	3.68405	9.80988	2.23989		4.68276	4.45407	4.37963
Cre02.g082900	11.6638	3.66135	15.0604	3.39858	10.5215	3.69317		3.18566	4.43138	2.84891
Cre10.g456600	9.89182	2.72044	11.8016	2.67427	6.42472	2.39383		3.63611	4.41302	2.68387
Cre09.g387000	311.683	120.207	321.678	73.0714	226.951	94.7387		2.59289	4.40224	2.39555
Cre05.g235700	50.1599	18.4183	74.3011	16.9551	46.6006	19.6286		2.72337	4.38223	2.37412
Cre10.g424550	338.024	108.153	344.979	78.7532	351.453	112.798		3.12542	4.38051	3.11577
Cre10.g434350	0.203887	0.097205	24.5481	5.61007	4.63159	6.22847		2.09749	4.37572	0.743616
Cre03.g210513	18.4845	17.4589	70.5623	16.2299	22.29	27.2974		1.05874	4.34767	0.816561
Cre07.g346900	0.770573	4.7029	250.264	57.8019	297.509	320.088		0.163851	4.32968	0.92946
Cre02.g097950	6.00299	4.11088	13.5247	3.12813	6.49813	3.27524		1.46027	4.32357	1.98402
Cre13.g586700	52.6275	15.0044	58.5149	13.658	40.9873	15.1222		3.50747	4.28429	2.71041
Cre09.g407200	12.0524	2.81273	11.9308	2.78999	7.93998	3.55399		4.28495	4.27629	2.2341
Cre01.g018500	7.5582	2.87584	9.91833	2.33099	5.71497	2.03159		2.62817	4.25499	2.81305
Cre06.g282300	79.5464	28.8878	94.2798	22.3022	69.6417	24.162		2.75363	4.22738	2.88228
Cre03.g155001	16.3757	9.43126	46.8905	11.1495	38.0511	18.4434		1.73632	4.20561	2.06313
Cre01.g010832	69.7217	8.96942	40.4533	9.68083	42.7294	6.0136		7.77327	4.1787	7.10546
Cre02.g087150	30.7639	8.95901	25.977	6.31792	25.9489	11.93		3.43385	4.11164	2.1751
Cre12.g560100	8.39725	2.97225	12.513	3.05554	8.28607	3.99255		2.82522	4.09518	2.07538
Cre01.g016350	12.5977	5.27984	23.736	5.8012	13.0021	6.48624		2.386	4.09157	2.00457
Cre06.g270300	11.8161	2.98528	12.2844	3.05732	11.2333	3.44949		3.95812	4.01803	3.25651
Cre12.g507800	1.11681	2.37611	59.4646	14.8799	95.9386	25.4807		0.470016	3.9963	3.76515
Cre12.g494550	138.271	38.4809	149.017	37.3667	118.957	35.9961		3.59324	3.98796	3.30472
Cre09.g391838	10.7459	3.05035	10.2917	2.58741	10.0946	3.59216		3.52284	3.97761	2.81018
Cre15.g643750	37.2862	15.4346	45.4413	11.4565	22.3959	12.5507		2.41575	3.96642	1.78443
Cre06.g278119	7.73653	5.20985	18.7661	4.7691	6.37391	4.74334		1.48498	3.93494	1.34376
Cre17.g718950	50.5787	14.3874	53.0791	13.535	42.5302	18.4573		3.51549	3.92162	2.30425
Cre13.g571200	17.2679	5.70321	17.386	4.43548	12.404	4.75739		3.02775	3.91976	2.60731
Cre03.g202500	55.9858	17.4572	55.5314	14.1786	45.7321	15.5549		3.20703	3.91656	2.94004
Cre01.g015500	27.4973	19.0814	72.6527	18.615	25.2565	25.4391		1.44105	3.90291	0.992822
Cre16.g666334	37.8117	12.1506	37.45	9.63217	28.4216	9.55978		3.11192	3.88801	2.97304
Cre06.g278271	20.0125	6.28241	23.89	6.19082	19.9974	6.25729		3.18548	3.85894	3.19586
Cre10.g452000	25.6047	12.8286	45.2628	11.7334	21.6994	13.1268		1.99591	3.8576	1.65306
Cre13.g570600	4.22747	3.27451	31.7607	8.23534	34.3936	8.85237		1.29102	3.85663	3.88524
Cre14.g611552	25.8605	8.41031	28.9161	7.50435	19.5211	9.42954		3.07486	3.85325	2.07021
Cre08.g360650	23.8929	6.45957	21.199	5.50369	20.1925	3.68933		3.69884	3.85178	5.47322
Cre11.g467603	7.06893	4.44418	15.5257	4.03448	8.97813	4.06809		1.5906	3.84825	2.20696
Cre16.g652000	229.207	70.7348	248.431	64.7158	208.35	56.4121		3.24037	3.8388	3.69336
Cre16.g678900	89.5634	21.7544	71.9324	18.8053	73.004	16.618		4.11702	3.82511	4.39307
Cre02.g105100	495.063	171.296	516.333	135.293	390.216	148.039		2.8901	3.81641	2.6359
Cre04.g232802	12.7985	3.66648	10.7354	2.83032	10.3434	3.13573		3.49068	3.793	3.29856
Cre10.g459500	120.435	42.8093	140.211	36.9804	77.4647	37.2737		2.81329	3.79149	2.07827
Cre10.g457050	10.9176	3.63902	12.161	3.20866	10.1721	3.34554		3.00015	3.79006	3.0405
Cre14.g609500	14.0317	2.96321	12.0214	3.17568	106.668	16.5113		4.7353	3.78546	6.4603
Cre02.g100300	190.732	57.0438	200.774	53.0794	152.259	56.8015		3.34361	3.78252	2.68055
Cre02.g117175	2.48063	1.10603	31.2669	8.29197	8.67321	7.88566		2.24282	3.77074	1.09987
Cre17.g720850	18.4369	4.12798	11.6734	3.11307	19.9579	3.86306		4.46632	3.7498	5.16634
Cre13.g587300	10.3028	5.59218	15.8449	4.25055	7.72452	4.69314		1.84236	3.72773	1.64592
Cre01.g036000	5.73167	2.606	10.2248	2.74722	4.47635	2.87998		2.19941	3.72187	1.5543
Cre16.g691204	11.9142	2.18293	10.7821	2.90092	13.8207	3.87068		5.45789	3.71679	3.57061
Cre12.g498300	22.5965	7.00499	24.7458	6.66878	22.8681	9.29281		3.22577	3.71069	2.46084
Cre13.g567200	5.5826	2.70772	11.5131	3.10411	4.18925	2.60225		2.06173	3.70899	1.60986
Cre12.g507300	842.935	372.35	1001.09	272.18	813.169	364.889		2.26382	3.67804	2.22854
Cre09.g392208	12.0827	2.88405	11.713	3.1854	13.88	6.5034		4.18949	3.67709	2.13427
Cre06.g302000	10.7453	4.5269	11.0084	3.01945	13.4266	7.54092		2.37366	3.64583	1.7805
Cre12.g547302	6.71835	6.31306	18.9145	5.20225	6.45131	6.19314		1.0642	3.63583	1.04169
Cre02.g118550	116.373	54.7308	111.528	30.825	150.034	42.4655		2.12628	3.6181	3.53308
Cre02.g099879	56.535	17.1724	67.1381	18.5706	51.2355	16.7709		3.2922	3.61529	3.05502
Cre16.g656800	6.64392	4.20229	12.4405	3.45073	5.80713	3.97775		1.58102	3.60518	1.4599
Cre01.g048650	79.7938	30.3528	90.0128	25.0707	64.8958	26.7005		2.62888	3.59036	2.43051
Cre13.g564450	7.44373	1.8401	14.7861	4.12906	12.3295	5.25613		4.04529	3.58098	2.34574
Cre12.g489900	8.11708	5.24654	12.1176	3.38618	6.78876	5.73674		1.54713	3.57855	1.18338
Cre11.g477733	18.2919	4.16687	13.0676	3.65417	18.4562	4.29668		4.38984	3.57608	4.29546
Cre12.g535100	54.0124	21.8953	54.2581	15.251	45.4634	13.2741		2.46685	3.55767	3.42497
Cre01.g045650	35.3306	10.4694	31.9452	9.1014	24.2673	10.9318		3.37465	3.50992	2.21988
Cre13.g574250	25.2751	9.33539	26.3376	7.5152	24.61	8.27539		2.70745	3.50458	2.97388
Cre01.g025850	20.6367	8.43496	24.7116	7.0624	15.3701	7.03033		2.44657	3.49904	2.18626
Cre03.g172700	10.1094	3.68736	12.2904	3.513	6.81204	3.07897		2.74164	3.49855	2.21244
Cre07.g325732	103.208	28.8245	78.7702	22.5868	78.4619	26.9492		3.58057	3.48744	2.91147
Cre03.g148150	11.5347	5.2606	13.6569	3.91672	7.36168	3.47207		2.19266	3.48682	2.12026
Cre02.g095144	21.048	8.2377	22.5261	6.47004	14.3144	7.47273		2.55508	3.4816	1.91555
Cre16.g680117	25.6804	8.22936	28.4982	8.19532	18.5812	8.71262		3.12058	3.47737	2.13268
Cre12.g518500	13.7324	1.90366	11.0467	3.19272	10.5362	1.63919		7.21368	3.45997	6.42769
Cre11.g475500	22.5402	11.4443	36.8067	10.6553	19.3112	11.115		1.96956	3.45431	1.7374
Cre05.g239600	9.15416	3.76485	9.89139	2.86905	7.76744	3.98106		2.43148	3.44762	1.9511
Cre01.g002250	26.2048	9.94112	31.9107	9.2722	21.4258	9.66877		2.636	3.44155	2.21598
Cre13.g564426	4.72156	1.47146	14.2423	4.14307	7.8537	4.01127		3.20876	3.43762	1.95791
Cre09.g403650	11.0792	4.20973	12.4267	3.61518	6.56013	2.77331		2.63181	3.43737	2.36545
Cre02.g075100	19.9026	5.39808	18.8227	5.47844	20.326	5.40128		3.68698	3.43578	3.76318
Cre17.g726700	13.6705	5.57859	13.516	3.95142	10.1966	4.70426		2.45053	3.42054	2.16752
Cre12.g538492	12.4454	5.42044	16.7293	4.9041	13.7093	4.27066		2.29601	3.41129	3.21011
Cre13.g583450	90.1324	36.6264	103.254	30.2807	78.3861	48.5072		2.46086	3.40989	1.61597
Cre03.g207800	10.8791	18.663	50.927	14.9815	11.3838	18.2764		0.582923	3.39933	0.622869
Cre02.g084450	21.7476	29.5182	101.033	29.8159	53.9567	25.7786		0.736752	3.38856	2.09308
Cre14.g623439	11.5172	10.3937	24.3108	7.17727	9.91845	7.6765		1.10809	3.38719	1.29205
Cre01.g055000	49.3046	18.5233	63.8701	18.8602	45.7239	17.4185		2.66176	3.3865	2.62502
Cre02.g120250	123.294	50.3	122.918	36.4352	96.3459	41.1075		2.45117	3.37361	2.34375
Cre06.g303850	18.7303	9.14942	31.1016	9.22496	15.7118	7.58584		2.04716	3.37146	2.0712
Cre08.g380000	106.174	42.4988	103.678	30.8228	84.0142	42.0118		2.49828	3.36368	1.99978
Cre07.g354700	26.3384	5.96292	18.1324	5.39625	19.4962	4.69952		4.41703	3.36019	4.14855
Cre04.g217930	5.84256	3.03117	11.4085	3.40555	4.10413	4.23878		1.92749	3.34997	0.968234
Cre07.g318050	33.2784	15.496	40.4864	12.0964	24.6615	13.2823		2.14755	3.34698	1.85672
Cre07.g336900	22.6338	9.47098	29.7363	8.88582	17.9211	11.6783		2.38981	3.34649	1.53456
Cre03.g187250	86.1	30.2175	88.6476	26.641	92.913	32.9975		2.84934	3.32749	2.81576
Cre10.g429750	9.40155	4.02626	10.2905	3.09495	6.56407	2.82032		2.33506	3.32493	2.32742
Cre09.g391245	25.5421	8.3505	24.5153	7.38701	17.0113	8.96835		3.05875	3.3187	1.89681
Cre15.g643740	138.285	54.5838	160.996	48.5294	132.015	59.2887		2.53344	3.31749	2.22665
Cre03.g194950	89.2499	35.3127	101.359	30.5999	50.1267	32.2998		2.52742	3.3124	1.55192
Cre07.g348450	61.6228	24.7964	70.957	21.4218	44.8504	23.2894		2.48515	3.31237	1.92579
Cre07.g335850	177.028	71.0154	220.923	66.8842	147.235	52.862		2.49281	3.30307	2.78527
Cre13.g569500	35.9174	10.9481	39.5142	12.0381	57.2985	19.0553		3.2807	3.28243	3.00696
Cre12.g558352	119.474	42.0976	137.492	42.0903	71.0392	36.5421		2.83802	3.2666	1.94404
Cre17.g721400	19.6654	8.43623	22.8455	7.00735	14.8517	7.15423		2.33106	3.26022	2.07593
Cre15.g634750	93.8228	42.0815	99.2524	30.5211	53.7068	38.0095		2.22955	3.25193	1.41298
Cre12.g522250	26.1008	10.0744	24.7229	7.6422	18.1338	9.49144		2.5908	3.23505	1.91054
Cre03.g198800	8.71406	5.20599	12.4089	3.84666	4.084	4.28521		1.67385	3.22589	0.953045
Cre06.g300150	10.8364	3.49938	11.3993	3.54221	9.14803	4.12916		3.09666	3.21813	2.21547
Cre02.g095082	69.5	21.7679	65.4007	20.3646	44.113	17.6029		3.19277	3.21149	2.50601
Cre16.g653900	6.82567	3.37599	10.1066	3.15863	4.87448	3.35704		2.02183	3.19968	1.45202
Cre16.g687350	65.7292	27.3653	75.6571	23.6855	39.6207	19.7762		2.40192	3.19424	2.00345
Cre12.g511150	25.7072	12.147	30.0173	9.40985	22.3137	12.2941		2.11634	3.18999	1.81499
Cre07.g355950	4.69223	0.607174	14.6403	4.59153	10.0587	2.86269		7.72798	3.18854	3.51372
Cre02.g107500	8.35168	3.07156	11.212	3.51656	8.68662	3.73068		2.71904	3.18834	2.32843
Cre06.g270950	46.9504	18.6323	55.8625	17.5223	34.2731	13.3073		2.51984	3.18808	2.57551
Cre07.g353250	41.4523	10.7099	31.8588	10.0116	33.4369	15.3537		3.87047	3.18219	2.17777
Cre12.g524700	43.9545	16.7485	43.5664	13.6984	35.5316	16.3174		2.62438	3.1804	2.17753
Cre13.g577352	13.7751	9.3095	19.7169	6.22398	6.50129	3.78587		1.47968	3.16789	1.71725
Cre06.g263200	302.836	61.5335	136.713	43.2693	189.568	31.0552		4.92148	3.15958	6.10423
Cre10.g422850	34.5912	6.01535	17.3168	5.48682	18.323	5.34393		5.75049	3.15607	3.42875
Cre16.g683400	19.7072	8.26056	26	8.26737	14.7261	8.11495		2.3857	3.14489	1.81469
Cre14.g608788	23.6076	6.90779	22.8349	7.26848	19.6098	7.59636		3.41753	3.14163	2.58147
Cre03.g191250	37.791	33.4611	99.4614	31.7671	40.7773	47.1968		1.1294	3.13096	0.863984
Cre01.g066552	231.622	95.8397	236.894	75.679	232.745	75.8349		2.41676	3.13025	3.0691
Cre10.g458100	3.85797	2.56845	11.7628	3.76309	7.07126	4.43783		1.50206	3.12584	1.5934
Cre04.g221550	77.0318	27.386	79.4206	25.5305	59.4779	38.4414		2.81282	3.11081	1.54724
Cre16.g690130	29.3901	19.3217	61.0889	19.649	43.0182	18.8014		1.52109	3.10901	2.28803
Cre09.g396438	110.898	79.7109	173.677	56.0813	33.1496	36.1667		1.39125	3.09688	0.916578
Cre05.g232002	59.0609	20.8594	54.9867	17.7941	36.7368	15.5788		2.83138	3.09016	2.35813
Cre03.g195000	87.307	30.1475	94.2506	30.5686	80.8134	35.5129		2.89599	3.08325	2.27561
Cre02.g094900	7.64555	3.46883	10.2867	3.35782	5.66018	3.3885		2.20407	3.06351	1.67041
Cre02.g142226	15.3838	5.73455	15.3522	5.02224	14.0922	6.56445		2.68265	3.05684	2.14674
Cre04.g214801	4.0761	1.39582	9.53905	3.12661	7.4956	3.46763		2.92022	3.05092	2.16159
Cre07.g323150	17.0393	5.44704	14.8797	4.88191	12.495	4.65131		3.12818	3.04793	2.68634
Cre10.g458450	41.3952	62.3674	228.288	75.2051	46.9402	82.0209		0.663731	3.03554	0.572296
Cre14.g616650	26.5069	4.61011	14.1404	4.68097	20.5632	3.00481		5.74973	3.02083	6.84343
Cre12.g554953	22.0835	7.70384	23.336	7.73875	21.2479	7.45234		2.86656	3.01547	2.85117
Cre01.g032850	10.0872	2.76293	11.1978	3.71715	8.30371	2.33707		3.65091	3.01247	3.55304
Cre05.g248000	27.3389	9.94263	27.5344	9.15825	25.3348	9.44011		2.74966	3.00651	2.68374
Cre02.g096300	70.8276	35.2455	103.217	34.3646	46.2717	30.0253		2.00955	3.00359	1.54109
Cre09.g390726	93.3949	29.1193	153.878	51.2733	65.9765	13.2467		3.20732	3.00113	4.9806
Cre16.g651350	10.8529	4.13866	11.0127	3.67381	11.1312	5.39037		2.62232	2.99762	2.06502
Cre04.g229300	1212.86	483.767	1255.16	419.199	1152.92	444.104		2.50712	2.99419	2.59606
Cre13.g603500	107.152	59.5398	147.308	49.2145	133.431	48.8247		1.79967	2.99318	2.73286
Cre07.g326150	45.3224	23.4773	61.7504	20.6365	32.4423	20.0462		1.93048	2.99229	1.61838
Cre14.g630500	13.8706	4.53446	16.1962	5.4351	9.23521	3.80344		3.05893	2.97993	2.42812
Cre01.g031650	14.1647	6.70073	24.7259	8.3166	13.276	5.41401		2.1139	2.97308	2.45216
Cre03.g187100	12.7963	5.23226	13.0981	4.41106	6.77257	5.96711		2.44565	2.96938	1.13498
Cre05.g247851	209.108	70.1522	188.165	63.3805	171.557	88.953		2.98078	2.96882	1.92863
Cre10.g431250	7.90933	3.38615	10.445	3.53647	4.95531	2.20543		2.33579	2.95351	2.24687
Cre03.g211521	30.3828	13.1318	30.9868	10.5225	18.5018	11.1395		2.31368	2.94481	1.66092
Cre03.g202600	32.0386	13.7504	33.2068	11.2893	25.7391	14.383		2.33001	2.94144	1.78955
Cre17.g696400	138.623	54.7098	174.329	59.4652	143.317	57.4641		2.53379	2.93161	2.49403
Cre10.g464500	44.2912	14.7791	42.6989	14.6026	42.9796	13.021		2.99688	2.92406	3.30079
Cre14.g628200	21.273	8.28396	19.4579	6.65862	14.2949	4.11552		2.56797	2.92221	3.47341
Cre06.g271200	17.3251	14.9895	58.4989	20.0483	18.8075	18.3803		1.15582	2.9179	1.02324
Cre13.g590500	1709.61	910.895	1367.89	469.035	2109.92	812.152		1.87685	2.91639	2.59794
Cre02.g107200	284.541	84.6112	260.934	89.7168	272.537	65.6843		3.36292	2.90842	4.1492
Cre07.g331250	8.05721	4.80913	13.2452	4.55581	5.83976	4.99141		1.6754	2.90732	1.16996
Cre05.g241600	72.651	24.3066	70.4363	24.2734	49.2118	25.1858		2.98894	2.90179	1.95395
Cre06.g263550	8.1436	15.6199	45.8883	15.8272	9.46248	22.4104		0.521361	2.89933	0.422236
Cre16.g661638	915.005	300.206	779.422	269.403	773.592	293.082		3.04792	2.89315	2.63951
Cre14.g631141	58.6805	22.8568	47.9592	16.5837	41.3715	17.0014		2.56731	2.89195	2.43342
Cre09.g391753	7.88653	6.82556	21.9192	7.5802	7.32715	8.1574		1.15544	2.89164	0.898221
Cre11.g467701	12.9278	5.81363	13.3667	4.62289	9.10493	4.51249		2.22371	2.89142	2.01772
Cre06.g282651	20.8882	8.73738	22.8248	7.90012	17.9699	7.24917		2.39067	2.88917	2.47889
Cre17.g701700	124.709	113.818	282.46	97.8266	235.841	108.943		1.09569	2.88735	2.16481
Cre12.g540351	9.82564	1.44123	24.7795	8.59264	21.4105	7.88294		6.81754	2.88381	2.71606
Cre16.g673057	19.0596	5.90603	14.4743	5.02576	13.0335	7.90956		3.22714	2.88002	1.64782
Cre06.g278118	7.40332	3.69426	14.6598	5.09189	10.9861	7.67575		2.00401	2.87905	1.43127
Cre02.g104300	26.0214	9.4531	29.1789	10.1493	24.1924	9.62822		2.75268	2.87497	2.51266
Cre10.g423550	33.2113	11.3127	31.6666	11.0164	33.355	22.6678		2.93575	2.8745	1.47147
Cre12.g521300	241.858	114.556	281.56	97.9883	208.705	90.4194		2.11126	2.8734	2.30819
Cre06.g295200	29.8181	12.2579	32.276	11.2616	19.3589	9.65973		2.43256	2.86602	2.00408
Cre09.g396846	35.5379	18.8018	54.9428	19.2031	27.5119	25.5609		1.89013	2.86114	1.07633
Cre06.g307150	63.6205	31.6145	70.9504	24.8418	51.4873	28.4085		2.01238	2.85609	1.81239
Cre08.g375950	14.4456	7.67139	18.2035	6.38084	12.0651	6.52127		1.88305	2.85284	1.85012
Cre03.g189200	27.862	9.16974	31.7531	11.1314	27.9485	9.81261		3.03847	2.85257	2.84822
Cre09.g387060	15.1016	10.1618	20.1104	7.05329	10.4502	6.72716		1.48611	2.85121	1.55343
Cre03.g179941	96.2373	32.6204	86.8992	30.5236	72.4154	27.0465		2.95022	2.84695	2.67744
Cre16.g674403	25.4998	10.4989	26.0013	9.14136	16.6737	8.71943		2.42881	2.84436	1.91225
Cre13.g605700	26.6891	10.95	33.0635	11.6676	26.0289	8.94549		2.43736	2.83379	2.90972
Cre16.g676533	13.3396	3.79046	10.2985	3.63559	11.3851	4.20665		3.51926	2.83269	2.70645
Cre16.g648350	33.6621	9.49675	24.2519	8.59007	23.3392	11.3415		3.54459	2.82325	2.05786
Cre01.g025100	24.6732	10.2666	31.325	11.1052	26.093	9.96407		2.40325	2.82075	2.61871
Cre04.g223500	16.9286	3.75557	14.9504	5.31078	9.04473	2.39946		4.5076	2.8151	3.76949
Cre10.g466050	6.11703	7.32138	13.5668	4.82247	9.56834	12.9302		0.835502	2.81325	0.739999
Cre12.g534550	17.1987	8.60391	21.5207	7.65564	16.68	8.05732		1.99894	2.81109	2.07017
Cre09.g394510	21.1058	16.8426	29.2251	10.3989	17.1015	17.447		1.25312	2.8104	0.980197
Cre02.g115800	31.3131	15.1098	38.2167	13.6215	27.7701	15.9597		2.07237	2.80562	1.74001
Cre03.g211745	23.7187	9.32322	23.0993	8.26214	17.8971	8.46048		2.54405	2.7958	2.11538
Cre01.g012400	11.3986	3.69458	12.0484	4.31084	8.74885	3.94777		3.08522	2.79491	2.21615
Cre03.g198050	24.9186	13.0758	29.0973	10.4174	18.7674	12.9586		1.9057	2.79314	1.44826
Cre03.g181300	291.709	129.886	289.217	103.628	252.826	126.559		2.24588	2.79092	1.99769
Cre02.g088250	18.6177	8.01711	13.9647	5.00377	10.611	5.82179		2.32225	2.79084	1.82264
Cre12.g542500	12.5782	5.48832	10.6315	3.81415	12.9889	6.50663		2.29181	2.78738	1.99626
Cre12.g552100	4.85713	4.67168	11.7301	4.22323	5.86184	4.38849		1.0397	2.77752	1.33573
Cre10.g426500	54.9712	19.7808	53.3987	19.2413	42.0231	14.9906		2.77902	2.77521	2.8033
Cre14.g628237	23.5878	6.84825	21.0254	7.58797	18.2647	5.17099		3.44435	2.77089	3.53215
Cre12.g530000	16.3626	8.28813	17.9045	6.4673	10.6574	7.18488		1.97422	2.76847	1.48331
Cre07.g349200	1079.85	282.114	880.808	318.382	1025.12	194.761		3.82771	2.76651	5.26348
Cre02.g073600	37.4335	17.003	30.327	10.9651	46.6401	33.6306		2.20158	2.76578	1.38684
Cre16.g656150	33.4018	13.8549	33.775	12.2156	20.1204	17.142		2.41083	2.76491	1.17375
Cre03.g144084	24.1129	9.61654	18.3853	6.65285	9.63822	9.52505		2.50744	2.76352	1.01188
Cre16.g679893	12.1893	4.3066	14.0253	5.0876	11.8517	4.91068		2.83038	2.75676	2.41345
Cre01.g044100	28.5857	14.8413	34.3716	12.4767	21.5055	13.919		1.92609	2.75486	1.54505
Cre03.g205450	11.4295	5.66422	20.3652	7.39383	8.39597	5.99546		2.01784	2.75435	1.40039
Cre02.g102350	21.6095	11.8163	25.6134	9.30205	25.5488	18.0008		1.82879	2.75352	1.41931
Cre13.g588650	35.2659	18.2328	45.9557	16.7363	23.3843	16.6335		1.9342	2.74587	1.40586
Cre12.g512400	9.3064	11.5301	28.4023	10.3505	11.355	9.7952		0.80714	2.74405	1.15924
Cre10.g440700	52.7759	22.0786	49.8218	18.1719	44.3516	19.7274		2.39036	2.74169	2.24822
Cre12.g497750	45.0176	18.9231	50.1276	18.284	38.5461	17.3894		2.37898	2.74161	2.21664
Cre08.g377550	183.285	59.3872	163.913	60.0655	175.756	80.8811		3.08627	2.7289	2.17302
Cre01.g035100	37.4145	22.8516	44.2079	16.2023	29.1668	17.5327		1.63728	2.7285	1.66357
Cre03.g179921	32.5435	13.3779	30.2006	11.0981	19.8841	13.4944		2.43263	2.72124	1.47351
Cre01.g044800	706.015	312.98	677.903	249.532	551.064	299.749		2.25578	2.7167	1.83842
Cre17.g734644	12.7798	17.0011	47.153	17.3779	15.9106	18.3768		0.751704	2.71339	0.865798
Cre12.g516650	16.689	6.38665	12.5846	4.63854	13.671	5.08365		2.61311	2.71305	2.68921
Cre06.g271000	45.4495	21.3943	52.068	19.2702	29.4096	19.5176		2.12437	2.702	1.50682
Cre12.g518000	11.5178	3.86582	11.4284	4.2417	12.6239	4.35971		2.97939	2.6943	2.89558
Cre09.g393506	15.431	10.4186	30.5129	11.3298	36.9099	10.931		1.4811	2.69315	3.37663
Cre16.g649050	10.3713	6.40961	19.0768	7.12044	9.65638	5.99458		1.61809	2.67916	1.61085
Cre04.g219787	9.7534	5.9276	12.813	4.80087	6.87243	4.60945		1.64542	2.66889	1.49094
Cre09.g393100	3.46662	4.05362	17.5411	6.57505	9.43512	5.62113		0.855191	2.66783	1.67851
Cre03.g205500	9.32099	4.77849	13.6986	5.13624	7.03273	2.78839		1.95061	2.66705	2.52215
Cre12.g521150	44.3329	20.5437	50.8486	19.0713	39.6672	20.7175		2.15798	2.66624	1.91467
Cre06.g264550	38.0472	16.6576	33.6422	12.6208	32.0191	15.4534		2.28407	2.66562	2.07198
Cre12.g497950	19.6626	4.79057	12.9794	4.87534	11.7731	7.56772		4.10444	2.66226	1.5557
Cre01.g033900	6.65364	3.17215	10.9854	4.12804	5.71993	2.58698		2.09752	2.66117	2.21105
Cre13.g579450	1375.37	285.945	925.19	347.905	1295.36	248.331		4.80991	2.65932	5.21626
Cre01.g028300	27.2481	14.3128	36.1621	13.6002	22.54	17.5145		1.90376	2.65894	1.28693
Cre12.g545619	16.5282	5.63668	12.2258	4.60214	10.266	5.26008		2.93226	2.65655	1.95168
Cre03.g165900	29.9209	10.9579	32.1164	12.1161	22.3327	11.2932		2.73053	2.65072	1.97754
Cre03.g195300	16.8223	6.08307	15.326	5.79579	10.9345	3.74615		2.76543	2.64433	2.91886
Cre17.g742100	55.1689	25.4832	48.4884	18.3437	43.5558	22.1827		2.16491	2.64333	1.9635
Cre13.g584200	58.842	9.49543	23.2012	8.78299	26.6472	3.47121		6.19688	2.64161	7.67663
Cre05.g245800	11.5287	5.48593	13.7348	5.21734	8.01958	4.77475		2.1015	2.63253	1.67958
Cre16.g672000	14.989	6.20932	15.7092	5.99221	15.8117	6.87263		2.41395	2.6216	2.30068
Cre12.g538550	15.7561	7.92625	21.5382	8.21965	14.1903	9.60444		1.98784	2.62033	1.47747
Cre07.g322650	17.1757	9.78392	20.958	8.00568	14.3285	9.34417		1.7555	2.61789	1.53342
Cre02.g084100	56.7698	32.6967	77.6991	29.7067	43.8464	42.1518		1.73625	2.61554	1.0402
Cre14.g611300	243.083	134.466	246.984	94.447	184.36	103.055		1.80777	2.61505	1.78895
Cre12.g483550	42.7405	13.6304	32.4774	12.4509	31.7295	15.8545		3.13567	2.60844	2.00129
Cre01.g012175	17.5932	6.40105	12.2104	4.68473	18.1627	5.3152		2.74849	2.60643	3.41712
Cre02.g076466	62.3875	24.127	55.3163	21.2238	59.8374	21.2945		2.5858	2.60633	2.80999
Cre09.g395750	13.6726	3.99656	16.5545	6.35654	12.719	6.86644		3.42109	2.60433	1.85234
Cre08.g360450	11.2141	4.05369	13.9923	5.38186	8.24309	3.62571		2.76639	2.5999	2.27351
Cre02.g105200	124.102	51.9858	134.69	51.9682	117.135	52.0819		2.38723	2.59178	2.24905
Cre16.g680566	14.9244	7.52104	16.6364	6.42677	11.5072	6.26488		1.98435	2.58861	1.83678
Cre02.g097000	14.4714	6.25224	39.4585	15.2507	17.7261	8.35053		2.31459	2.58732	2.12275
Cre14.g629750	18.7391	11.6496	27.3624	10.5772	126.69	10.9254		1.60856	2.58692	11.5959
Cre13.g569000	15.5739	3.15968	15.211	5.88353	16.441	7.8921		4.92895	2.58535	2.08322
Cre09.g396350	28.1152	9.04132	16.7949	6.51653	19.1261	8.85706		3.10963	2.57728	2.15942
Cre12.g487950	15.7503	7.51143	17.3659	6.749	12.1911	5.93535		2.09684	2.57311	2.05398
Cre13.g580000	732.22	258.927	831.489	323.874	569.601	217.857		2.8279	2.56732	2.61456
Cre03.g176350	11.7601	3.7664	11.0793	4.31925	12.7828	4.52678		3.12237	2.5651	2.82382
Cre02.g075800	33.0406	13.8978	34.0684	13.3353	28.4222	14.3184		2.3774	2.55475	1.98501
Cre04.g219950	12.1408	8.51483	17.5567	6.88048	6.18383	6.44966		1.42584	2.55167	0.958784
Cre09.g406350	10.9838	6.46775	16.8409	6.60428	8.7221	6.09272		1.69824	2.55	1.43156
Cre12.g551501	498.336	230.203	599.552	235.275	381.975	214.645		2.16477	2.5483	1.77957
Cre02.g075050	140.428	57.1115	119.427	46.8975	110.123	32.0531		2.45884	2.54655	3.43564
Cre02.g091193	33.0422	12.6181	32.0605	12.59	30.7732	14.5178		2.61864	2.54651	2.11969
Cre05.g242600	49.0949	23.8154	68.6846	26.9755	37.8989	29.0774		2.06148	2.54618	1.30338
Cre01.g003516	22.7051	15.6345	34.7762	13.6615	23.3289	14.3815		1.45224	2.54556	1.62215
Cre06.g288900	18.8696	6.64749	18.2639	7.19183	15.8675	5.59962		2.83861	2.53953	2.83367
Cre02.g113450	10.0347	3.91368	9.78882	3.86543	7.57021	3.38902		2.56401	2.5324	2.23375
Cre04.g223700	7.70463	4.75877	10.7492	4.25549	8.61754	6.38843		1.61904	2.52596	1.34893
Cre09.g399030	63.0566	27.4104	64.5843	25.6006	49.8302	21.2217		2.30046	2.52277	2.34808
Cre01.g013500	73.7814	13.8598	40.554	16.0774	46.0136	10.0097		5.32341	2.52242	4.5969
Cre16.g687400	35.7123	11.036	25.9243	10.3043	22.9216	10.9578		3.23598	2.51587	2.09181
Cre07.g326650	13.6878	12.9349	38.6732	15.3928	23.9133	14.5613		1.05821	2.51242	1.64225
Cre09.g394621	7.40165	6.19056	13.0923	5.21229	4.86132	5.40434		1.19563	2.51181	0.899521
Cre10.g444700	171.296	78.1818	165.745	66.0854	156.614	80.366		2.191	2.50804	1.94876
Cre14.g611484	15.4039	4.51433	11.7383	4.6931	16.5326	5.17287		3.41222	2.50118	3.19602
Cre06.g271850	35.127	15.0727	38.782	15.5063	30.8003	14.3181		2.3305	2.50105	2.15114
Cre06.g274700	29.9641	14.2732	27.886	11.1592	19.22	9.82094		2.09933	2.49892	1.95704
Cre01.g027200	111.747	47.9432	101.484	40.628	99.1546	55.9082		2.33082	2.49788	1.77353
Cre03.g203700	14.73	8.27623	18.6721	7.48689	11.7583	7.88335		1.7798	2.49397	1.49154
Cre09.g415600	63.6494	41.5298	83.2046	33.403	60.2215	40.5258		1.53262	2.49093	1.486
Cre01.g059252	10.2108	6.08443	13.5355	5.43826	9.6625	6.0997		1.67819	2.48894	1.58409
Cre03.g143807	29.0985	17.2867	38.9039	15.6308	26.3786	14.2435		1.68329	2.48893	1.85197
Cre11.g467678	10.5779	6.02949	11.7243	4.71602	7.45056	4.47878		1.75436	2.48606	1.66352
Cre06.g293200	14.4218	12.9915	22.134	8.91451	10.6346	9.37846		1.1101	2.48292	1.13394
Cre02.g106950	6.75946	4.8261	11.3106	4.55917	8.75794	5.78488		1.40061	2.48085	1.51394
Cre09.g387450	33.2075	10.6165	23.0667	9.34166	34.0295	9.10259		3.12791	2.46923	3.73844
Cre11.g479900	45.3306	35.2293	58.3219	23.7036	36.4304	25.988		1.28673	2.46047	1.40182
Cre05.g239400	22.6431	14.567	34.6669	14.144	17.7204	14.721		1.55441	2.451	1.20375
Cre13.g575750	9.26432	5.56237	12.4475	5.08217	9.30283	6.04445		1.66553	2.44925	1.53907
Cre14.g628000	26.9493	12.6974	22.3495	9.14389	18.4337	10.2936		2.12243	2.4442	1.79079
Cre12.g527000	69.7309	44.4584	80.0095	32.7558	55.7098	48.2264		1.56845	2.44261	1.15517
Cre12.g501150	17.2474	10.3443	21.2138	8.69125	14.3923	7.52625		1.66733	2.44082	1.91228
Cre09.g401960	58.5389	25.089	71.0906	29.1483	24.6875	11.8718		2.33325	2.43893	2.07951
Cre04.g230046	12.5789	4.07373	10.1819	4.17894	8.15346	4.37227		3.08781	2.43648	1.86481
Cre12.g488800	57.2177	18.8593	37.5267	15.4122	42.9179	19.8934		3.03392	2.43487	2.15739
Cre17.g702250	6.81911	4.3827	10.8806	4.47142	5.49747	3.79157		1.55592	2.43337	1.44992
Cre05.g237283	28.4034	11.2183	27.5514	11.33	35.2798	12.3004		2.53188	2.43172	2.86818
Cre12.g515450	26.8474	15.7268	33.6229	13.8328	23.3464	14.161		1.70711	2.43066	1.64864
Cre02.g097050	14.842	9.14437	21.3996	8.81765	12.9552	12.8237		1.62308	2.42691	1.01025
Cre10.g448400	24.1791	5.53759	18.5029	7.62529	25.8063	8.09096		4.36636	2.42652	3.18952
Cre10.g444300	11.6364	5.05215	9.71214	4.00707	10.0716	3.34892		2.30326	2.42375	3.00742
Cre13.g603750	16.0676	6.24398	13.7635	5.67871	10.5071	4.72971		2.57329	2.4237	2.22151
Cre03.g203950	12.7673	3.89185	9.5037	3.92771	11.296	4.30007		3.28052	2.41965	2.62693
Cre14.g632847	13.8715	3.82193	10.8877	4.50377	12.5789	4.65095		3.62945	2.41746	2.70459
Cre17.g711200	17.0367	6.78846	16.4842	6.82279	16.6821	6.92253		2.50966	2.41605	2.40983
Cre12.g523026	24.0251	8.01724	17.8221	7.37682	16.6523	7.1718		2.99668	2.41596	2.32191
Cre10.g418450	2248.31	781.45	1641.38	679.675	2090.02	547.106		2.8771	2.41495	3.82014
Cre08.g364400	14.4024	7.42106	16.1286	6.67933	10.8415	6.33495		1.94075	2.4147	1.71138
Cre03.g211409	8.47781	10.7118	21.5207	8.91765	6.46525	7.64561		0.791446	2.41327	0.845616
Cre02.g100450	16.0207	6.69408	18.8562	7.81411	10.0696	6.3416		2.39326	2.4131	1.58786
Cre13.g572401	59.9551	27.9746	56.3925	23.3922	46.0925	26.2421		2.1432	2.41074	1.75643
Cre01.g034150	16.2374	9.55849	21.0063	8.72441	9.60558	6.95529		1.69874	2.40776	1.38105
Cre02.g105750	7.688	3.99072	10.3811	4.31705	8.47789	5.84754		1.92647	2.40467	1.44982
Cre03.g145267	9.83715	4.59405	11.7299	4.87956	12.0064	7.09782		2.14128	2.40388	1.69156
Cre17.g721850	24.7453	11.7958	24.8909	10.3553	15.7116	9.33687		2.09781	2.40369	1.68275
Cre06.g300144	21.6132	8.97998	23.7922	9.90443	22.3444	11.2509		2.40682	2.40218	1.98601
Cre10.g435650	14.3001	8.04557	15.4839	6.44688	12.1084	5.77127		1.77739	2.40177	2.09805
Cre07.g353850	9.10408	4.83147	11.3632	4.73188	8.51575	6.665		1.88433	2.40141	1.27768
Cre14.g629700	34.0799	13.0711	26.7676	11.1544	25.5494	8.41188		2.60727	2.39973	3.0373
Cre09.g387208	24.7439	14.9634	30.4859	12.7214	19.405	13.4975		1.65363	2.39643	1.43767
Cre09.g396450	15.1881	7.31375	17.4172	7.27404	9.90678	7.06248		2.07665	2.39443	1.40273
Cre13.g566850	10.7415	4.36557	10.1168	4.22692	16.0112	6.14311		2.4605	2.39342	2.60637
Cre10.g446800	18.2963	8.50265	18.2923	7.64735	14.4899	8.05071		2.15184	2.39198	1.79983
Cre08.g380800	14.7981	6.77079	12.399	5.18705	14.9119	7.80643		2.18558	2.39038	1.91021
Cre07.g325650	15.0053	5.20731	13.0135	5.45426	18.3652	7.3903		2.88158	2.38593	2.48504
Cre16.g656900	11.2522	7.18243	13.6006	5.70461	10.3	5.91187		1.56663	2.38414	1.74226
Cre07.g338451	242.638	94.3876	135.752	57.0348	136.456	60.8848		2.57066	2.38016	2.24122
Cre12.g522500	10.2347	4.34773	10.7743	4.53661	9.94272	3.79111		2.35403	2.37497	2.62264
Cre04.g224350	13.8296	5.94975	13.5577	5.71475	14.3592	6.15304		2.3244	2.3724	2.33368
Cre09.g392050	68.3878	29.0258	60.8013	25.7072	50.783	29.8826		2.3561	2.36515	1.69942
Cre10.g441750	24.7623	13.4112	29.8605	12.639	23.6549	14.4468		1.84639	2.36257	1.63738
Cre01.g030700	13.8864	6.72489	13.0547	5.52864	10.1823	5.04979		2.06493	2.36129	2.01638
Cre06.g289050	14.0708	4.66907	10.7782	4.56887	11.3173	3.53154		3.01362	2.35905	3.20464
Cre13.g604905	13.8595	6.38617	15.3472	6.51737	10.1611	4.76317		2.17024	2.35481	2.13326
Cre04.g228150	19.5057	7.16364	18.1839	7.72499	14.9635	6.41949		2.72288	2.35391	2.33095
Cre02.g095097	15.1259	8.06405	16.1139	6.84957	16.5876	8.98809		1.87572	2.35254	1.84551
Cre16.g660225	36.5041	17.455	36.163	15.3888	38.5192	17.4867		2.09133	2.34996	2.20277
Cre14.g619854	14.824	6.94459	17.1806	7.31124	13.2097	6.42817		2.13461	2.34989	2.05497
Cre01.g026200	8.98398	6.52169	13.4982	5.74698	11.4294	5.35953		1.37755	2.34875	2.13254
Cre09.g395213	374.372	83.0679	229.645	97.8564	518.676	102.231		4.50682	2.34676	5.07357
Cre01.g013000	12.8119	5.03798	10.48	4.47341	7.50472	4.49161		2.54306	2.34273	1.67083
Cre01.g054050	70.6444	54.0725	100.5	42.9135	59.627	54.5407		1.30648	2.34192	1.09326
Cre03.g150550	12.4257	7.29138	15.0666	6.46908	6.66575	4.23409		1.70416	2.32902	1.57431
Cre02.g141946	14.918	6.2618	12.2197	5.26978	10.8826	4.2543		2.38238	2.31883	2.55802
Cre16.g689650	195.839	92.4909	215.371	92.9728	251.132	140.758		2.11739	2.31649	1.78414
Cre17.g722650	142.054	59.7377	144.947	62.5843	115.883	52.0334		2.37796	2.31603	2.22709
Cre16.g654550	12.9991	5.11385	11.4613	4.97612	9.67243	5.26616		2.54194	2.30326	1.83671
Cre03.g202225	21.4464	20.0422	34.5821	15.0233	27.2463	15.6775		1.07006	2.3019	1.73792
Cre07.g335950	15.682	8.21535	17.8465	7.76622	14.7448	8.81222		1.90887	2.29796	1.67322
Cre06.g307750	79.331	11.5609	46.4927	20.2383	66.6245	11.317		6.86201	2.29726	5.88712
Cre04.g212200	50.3366	24.7835	50.3389	21.9233	51.5357	24.3428		2.03105	2.29614	2.11708
Cre06.g278221	34.4247	20.1218	39.6221	17.2754	22.3197	16.9571		1.71082	2.29356	1.31625
Cre16.g663950	29.2883	38.4403	84.4116	36.809	179.395	69.7808		0.761917	2.29323	2.57084
Cre14.g608452	17.5996	9.27316	22.5297	9.838	13.4069	7.98637		1.89791	2.29007	1.67872
Cre16.g661626	352.093	134.822	293.47	128.159	265.026	130.443		2.61154	2.28989	2.03174
Cre03.g145467	36.0656	14.417	30.3601	13.2637	28.806	7.68235		2.5016	2.28896	3.74963
Cre12.g550200	9.18835	4.19511	9.75349	4.26752	9.64952	5.86214		2.19025	2.28552	1.64607
Cre12.g485550	15.4366	6.41701	11.583	5.07182	14.5369	5.63536		2.40558	2.2838	2.57959
Cre06.g270050	33.2729	23.9158	42.3431	18.5524	11.5239	15.9107		1.39125	2.28235	0.724286
Cre06.g278255	35.3789	24.2462	51.4625	22.5575	30.8233	18.3073		1.45915	2.28139	1.68366
Cre09.g395288	6.05027	3.72971	10.1844	4.46448	5.15681	3.82363		1.62218	2.28121	1.34867
Cre02.g081950	9.80365	4.97102	14.8438	6.53681	8.60411	5.62234		1.97216	2.2708	1.53034
Cre02.g080750	12.5242	8.65837	15.7947	6.95704	9.47794	7.58809		1.44648	2.27032	1.24905
Cre03.g176700	19.9524	10.1705	21.095	9.29723	14.8981	10.6645		1.96179	2.26896	1.39698
Cre16.g665800	45.251	23.6329	48.1351	21.2176	45.2119	23.9499		1.91475	2.26864	1.88777
Cre05.g246377	9.53744	4.86447	10.0886	4.45036	10.5531	4.61773		1.96063	2.26692	2.28534
Cre03.g144564	123.411	45.072	82.8333	36.5445	53.4545	23.0932		2.73809	2.26664	2.31473
Cre01.g045200	292.314	37.9155	144.086	63.5929	285.715	46.33		7.70962	2.26576	6.16695
Cre04.g232402	13.2242	5.97408	10.8987	4.81399	7.40526	6.3043		2.2136	2.26396	1.17464
Cre03.g207200	12.9158	7.9452	13.8733	6.13482	10.598	7.35713		1.62561	2.2614	1.44051
Cre01.g043050	21.544	13.1898	23.4455	10.3686	20.7857	10.6968		1.63338	2.2612	1.94317
Cre10.g430350	34.3405	17.279	37.7746	16.7129	34.6249	16.9306		1.98741	2.26021	2.04511
Cre12.g541950	8.47903	6.55736	14.2044	6.28746	8.48726	7.56173		1.29306	2.25916	1.1224
Cre07.g338350	24.036	11.387	25.8046	11.4227	18.9449	16.0637		2.11083	2.25906	1.17936
Cre04.g228625	24.8047	13.7254	30.3236	13.4237	22.6687	13.9358		1.80721	2.25896	1.62665
Cre09.g388838	15.7553	6.25272	19.8581	8.8118	19.5376	8.95534		2.51975	2.25358	2.18167
Cre07.g355850	99.0003	66.624	168.996	74.9916	73.9751	96.6134		1.48596	2.25353	0.765682
Cre13.g590600	16.7945	10.4894	19.5994	8.70068	11.636	8.00973		1.60109	2.25263	1.45273
Cre16.g661300	10.0745	9.5895	15.2228	6.76697	8.64832	6.27761		1.05058	2.24957	1.37765
Cre03.g198851	57.0442	36.4408	68.9324	30.7005	35.8805	35.1883		1.56539	2.24532	1.01967
Cre10.g423400	36.71	20.0744	45.632	20.326	27.0611	20.1824		1.8287	2.24501	1.34083
Cre11.g480250	20.4591	5.36818	13.3652	5.95387	17.965	5.59514		3.81118	2.24479	3.21082
Cre04.g211600	25.5685	17.7319	35.1955	15.6989	17.5177	13.2388		1.44195	2.24191	1.32321
Cre07.g341100	134.254	53.9503	142.408	63.5393	122.858	55.4884		2.48848	2.24126	2.21412
Cre16.g685250	15.4868	7.72025	14.9072	6.65367	10.9446	5.8918		2.006	2.24045	1.8576
Cre06.g267000	20.8391	8.9991	22.4123	10.0075	19.0343	9.05378		2.31569	2.23955	2.10236
Cre12.g507333	2.67753	5.15296	9.57452	4.27922	3.49108	9.79704		0.51961	2.23745	0.35634
Cre12.g524250	9.18143	5.78886	11.1678	4.99593	7.36253	5.82051		1.58605	2.23538	1.26493
Cre17.g722200	10.3438	10.5338	20.4388	9.15264	9.4668	9.27453		0.981963	2.2331	1.02073
Cre16.g659250	13.6326	11.0669	23.3653	10.4703	10.892	10.787		1.23184	2.23158	1.00973
Cre12.g534650	8.85517	5.3409	10.0266	4.49416	6.05354	5.40863		1.65799	2.23103	1.11924
Cre09.g391726	100.453	47.0866	102.173	45.853	100.558	41.6472		2.13337	2.22827	2.41452
Cre07.g334700	25.1167	14.5675	32.1505	14.4311	28.394	19.4837		1.72416	2.22786	1.45732
Cre02.g088850	271.655	133.407	282.357	126.885	273.967	132.501		2.03629	2.2253	2.06766
Cre16.g687700	66.309	43.3303	91.6096	41.1811	41.393	41.8459		1.53031	2.22455	0.989177
Cre03.g211073	47.6223	33.8345	59.8092	26.9021	38.7968	30.8417		1.40751	2.22322	1.25793
Cre13.g579582	11.3933	7.7848	14.0957	6.3459	8.17081	6.72537		1.46353	2.22123	1.21492
Cre17.g731100	43.3535	26.3163	45.1634	20.3816	42.7728	26.5945		1.6474	2.21589	1.60833
Cre14.g612800	134.222	83.5833	161.576	72.9632	142.584	81.005		1.60585	2.21449	1.76019
Cre03.g186100	6.11456	4.68079	15.1741	6.85791	7.78853	4.91068		1.30631	2.21264	1.58604
Cre17.g717400	13.781	5.00747	12.0624	5.45583	11.7648	4.82087		2.75209	2.21092	2.44039
Cre13.g562526	9.94303	6.7291	12.1257	5.48695	7.88414	5.85256		1.47762	2.20992	1.34713
Cre17.g731900	15.275	8.74929	17.6496	7.98898	10.0336	8.12235		1.74586	2.20924	1.23531
Cre09.g389700	22.6065	10.4876	19.8257	9.00395	17.5148	10.1747		2.15555	2.20189	1.72141
Cre10.g434650	7.5125	14.0051	59.0755	26.8649	17.3328	39.7766		0.536412	2.19898	0.435754
Cre06.g267750	13.0373	5.5675	14.1212	6.43652	12.7881	7.47238		2.34168	2.19392	1.71138
Cre02.g109200	19.741	16.3113	29.5528	13.4742	17.6805	16.0628		1.21027	2.19329	1.10071
Cre14.g611750	9.97023	9.1631	16.7954	7.65978	8.95918	5.92192		1.08808	2.19267	1.51288
Cre12.g490500	55.6398	121.708	275.861	126.459	1743.85	188.766		0.457158	2.18143	9.23816
Cre16.g686510	11.7545	5.23135	11.1899	5.13183	9.37022	5.12121		2.24693	2.18049	1.82969
Cre07.g333050	12.8299	4.3546	18.0994	8.31464	16.358	9.04447		2.94629	2.17681	1.80862
Cre05.g248200	21.173	13.9492	23.1775	10.6664	12.6331	10.1523		1.51786	2.17294	1.24436
Cre08.g385350	23.1277	13.8597	26.0943	12.0486	16.9304	13.3354		1.6687	2.16575	1.26958
Cre07.g346500	19.4512	8.7533	21.0724	9.73567	17.844	8.11774		2.22216	2.16445	2.19815
Cre06.g311350	61.039	42.1036	89.7918	41.4974	54.0534	43.9758		1.44973	2.16379	1.22916
Cre02.g147900	141.304	76.9794	161.246	74.53	127.965	76.7354		1.83561	2.1635	1.66761
Cre03.g180700	119.412	56.1848	114.425	52.8969	150.218	52.0438		2.12534	2.16317	2.88638
Cre09.g402923	80.3887	28.6487	64.7923	29.957	65.648	25.3424		2.80602	2.16284	2.59044
Cre01.g028101	27.0978	12.4098	26.1306	12.0816	26.5895	12.5538		2.18358	2.16284	2.11804
Cre06.g301450	29.7245	14.4436	23.0257	10.649	17.8003	13.3256		2.05797	2.16224	1.3358
Cre10.g463370	31.7175	12.1783	31.863	14.7708	31.7324	12.9509		2.60443	2.15716	2.45021
Cre17.g723850	12.9101	8.52028	15.6735	7.26877	10.9402	8.43466		1.51522	2.15628	1.29705
Cre12.g514100	20.5641	11.6415	23.1249	10.732	19.1486	13.032		1.76645	2.15476	1.46935
Cre04.g223800	56.4232	22.2167	52.3909	24.3364	45.1982	19.329		2.53968	2.15278	2.33836
Cre12.g530650	816.266	418.455	935.544	434.888	765.289	422.946		1.95067	2.15123	1.80942
Cre07.g318350	42.9158	18.0814	36.5325	16.9824	35.3423	15.2806		2.37348	2.1512	2.31289
Cre10.g430550	16.1577	8.51181	16.7512	7.78692	16.9973	9.60666		1.89827	2.1512	1.76932
Cre17.g726750	388.159	185.517	313.992	146.02	295.923	206.559		2.09231	2.15034	1.43263
Cre02.g112150	73.5879	27.2025	52.1147	24.2619	57.9803	27.1369		2.70519	2.14801	2.13659
Cre03.g207500	47.7157	20.7704	39.8827	18.5896	53.5681	21.6622		2.29729	2.14543	2.47288
Cre05.g241350	22.572	10.2226	19.7337	9.19825	14.3412	7.60636		2.20805	2.14538	1.88542
Cre12.g536800	85.6692	47.9842	90.7201	42.3475	62.0671	45.5645		1.78536	2.14228	1.36218
Cre16.g668900	47.4907	29.753	56.2185	26.2681	41.6364	24.6127		1.59617	2.14018	1.69166
Cre14.g624000	63.4928	31.9229	39.3147	18.3723	42.2339	24.2414		1.98894	2.13989	1.74222
Cre12.g509450	28.3976	15.8805	26.5401	12.4097	24.3122	13.605		1.78821	2.13866	1.787
Cre07.g330300	39.8222	23.6129	49.024	22.9861	29.97	19.6631		1.68646	2.13277	1.52417
Cre07.g328950	10.0444	4.95542	9.65659	4.53023	6.79979	4.08633		2.02695	2.13159	1.66403
Cre03.g161850	18.6709	9.02204	19.6988	9.24629	15.4574	9.43084		2.06948	2.13045	1.63903
Cre13.g570700	13.8723	5.28291	10.2623	4.81816	8.74827	4.28554		2.62588	2.12992	2.04135
Cre03.g144364	43.2533	24.1285	41.6388	19.5497	35.7043	23.3431		1.79262	2.12989	1.52954
Cre05.g247700	9.34656	4.84528	13.8764	6.53559	5.56593	6.40804		1.929	2.12321	0.868585
Cre14.g610100	14.4289	4.82691	12.0074	5.65964	16.6364	7.2225		2.98926	2.12158	2.30341
Cre17.g709450	15.1319	8.08591	22.3927	10.5654	20.2883	11.8985		1.87139	2.11944	1.70511
Cre07.g355300	9.60004	6.94855	13.7546	6.49566	7.45918	6.96702		1.38159	2.11751	1.07064
Cre03.g159100	12.3333	14.1549	33.4685	15.808	12.5551	12.8765		0.87131	2.11719	0.97504
Cre12.g511900	865.347	411.103	865.943	409.251	905.764	397.837		2.10494	2.11592	2.27672
Cre01.g005900	10.0434	4.90847	9.5633	4.52287	8.58843	4.32226		2.04614	2.11443	1.98702
Cre02.g088651	20.0284	8.82847	17.8122	8.42506	16.6168	7.17383		2.26862	2.11419	2.31631
Cre02.g085450	42.3877	105.37	204.036	96.584	610.928	113.874		0.402275	2.11252	5.36495
Cre02.g095350	15.9284	16.7169	33.4212	15.8219	11.6131	14.5102		0.952832	2.11234	0.80034
Cre07.g350750	65.4469	21.1812	58.9254	27.9193	47.0439	34.2203		3.08986	2.11056	1.37474
Cre01.g029050	55.5863	29.0642	61.4348	29.1275	56.9359	31.7186		1.91254	2.10917	1.79503
Cre06.g278264	11.1251	8.68901	17.1566	8.13772	12.0467	9.78808		1.28036	2.10828	1.23075
Cre09.g390467	36.1668	13.3878	27.6642	13.1344	45.248	18.2239		2.70147	2.10624	2.48289
Cre05.g232800	8.19749	4.25224	10.8707	5.16375	6.2095	4.42958		1.92781	2.10519	1.40183
Cre08.g385700	18.005	9.90949	22.878	10.8745	19.1184	11.4787		1.81695	2.10382	1.66555
Cre02.g076625	11.9583	7.52161	12.1265	5.77951	7.92552	5.87913		1.58986	2.09819	1.34808
Cre04.g217150	11.7107	6.45265	14.4827	6.90832	10.1024	6.13404		1.81487	2.09641	1.64694
Cre14.g624550	18.4644	10.4711	21.6544	10.342	22.7357	11.9522		1.76337	2.09383	1.90222
Cre01.g046150	10.2755	6.03388	12.7513	6.09103	8.29465	6.12934		1.70297	2.09346	1.35327
Cre03.g180000	34.788	18.364	37.5901	17.9694	28.7441	15.9985		1.89436	2.0919	1.79667
Cre02.g096200	23.4683	14.3295	27.2335	13.0201	24.8151	15.7661		1.63776	2.09165	1.57395
Cre10.g432550	9.03346	6.1068	11.7147	5.60252	9.54547	5.45784		1.47925	2.09097	1.74895
Cre11.g467682	23.9804	13.0539	23.9363	11.4642	13.9264	10.808		1.83703	2.08792	1.28853
Cre06.g300139	34.0036	13.6266	31.5248	15.1085	39.5637	15.1372		2.49538	2.08656	2.61367
Cre11.g482626	14.138	8.75242	17.7394	8.53129	11.7615	8.14664		1.61532	2.07933	1.44372
Cre01.g037250	121.787	59.4801	129.465	62.2879	118.029	53.3043		2.04753	2.07849	2.21425
Cre02.g112000	9.66234	5.12621	10.2129	4.91438	9.92272	5.09579		1.88489	2.07817	1.94724
Cre03.g161606	12.618	3.5436	10.4333	5.02238	15.9188	5.92219		3.56079	2.07736	2.68799
Cre12.g496350	8.85261	5.61801	12.2908	5.92972	7.13913	5.2207		1.57576	2.07275	1.36747
Cre12.g505650	49.4085	29.2512	60.9006	29.413	32.9639	25.9535		1.68911	2.07053	1.27011
Cre16.g659450	15.8646	6.10877	11.6199	5.61869	11.5475	3.99913		2.59702	2.06808	2.8875
Cre02.g145500	16.5155	9.9774	18.939	9.16435	11.695	9.78311		1.65529	2.0666	1.19543
Cre04.g226500	14.7506	7.48592	14.0493	6.79919	14.5053	6.24685		1.97045	2.06632	2.32202
Cre16.g678808	22.9362	14.0659	20.2733	9.81204	15.4481	11.4189		1.63062	2.06617	1.35285
Cre01.g052000	31.7005	15.3343	30.3985	14.7126	26.777	16.1831		2.06729	2.06615	1.65463
Cre17.g720450	23.4441	12.5388	24.0196	11.6354	20.7986	11.719		1.86972	2.06436	1.77478
Cre16.g682000	237.588	150.725	293.561	142.42	233.053	152.474		1.5763	2.06123	1.52848
Cre15.g641750	9.08795	4.84108	9.99031	4.8644	7.69319	8.06333		1.87726	2.05376	0.954096
Cre02.g146400	11.7868	6.96278	11.6068	5.65641	9.58811	6.36184		1.69283	2.05197	1.50713
Cre06.g299200	11.3493	5.4008	12.6469	6.17285	11.6191	5.54648		2.10141	2.04879	2.09486
Cre10.g430750	35.3897	23.8306	41.6339	20.3427	33.3161	22.1864		1.48505	2.04663	1.50165
Cre09.g400950	108.668	35.4145	68.7519	33.6142	72.176	42.9997		3.06846	2.04532	1.67852
Cre13.g591650	17.5359	9.92791	16.6031	8.13317	14.1168	6.65811		1.76632	2.04141	2.12024
Cre14.g617700	8.15417	5.51769	9.61462	4.71023	4.79423	4.03315		1.47782	2.04122	1.18871
Cre10.g457500	45.2527	30.1363	47.4541	23.2662	41.9078	23.8873		1.5016	2.03962	1.7544
Cre12.g517350	41.5705	31.5441	55.4321	27.1806	43.9006	35.8699		1.31785	2.0394	1.22388
Cre10.g444000	48.331	26.6286	54.3086	26.6551	50.989	38.845		1.815	2.03746	1.31263
Cre13.g577100	4256.18	2096.26	4760.29	2337.44	9924.24	1994.63		2.03037	2.03654	4.97548
Cre02.g076250	667.424	469.248	633.757	311.257	657.078	383.049		1.42233	2.03612	1.71539
Cre06.g266250	45.4032	31.3971	55.7119	27.3663	42.25	36.535		1.4461	2.03578	1.15643
Cre01.g015700	9.93328	5.16381	11.414	5.608	10.305	6.30809		1.92363	2.03531	1.63362
Cre13.g562031	16.2873	9.34473	18.032	8.86949	18.8758	9.17084		1.74294	2.03304	2.05824
Cre12.g544662	12.1121	4.76075	10.7622	5.29569	7.66771	4.79473		2.54416	2.03226	1.5992
Cre03.g157600	11.3954	7.69286	13.6326	6.71477	7.22564	6.11925		1.4813	2.03024	1.1808
Cre02.g103150	12.7828	10.5582	16.1907	7.98119	14.1885	11.824		1.2107	2.02861	1.19997
Cre03.g165300	12.7138	9.29852	15.6641	7.73466	10.5342	10.5956		1.36729	2.02518	0.994205
Cre01.g034850	8.70988	5.37697	11.1394	5.50315	5.53772	3.98267		1.61985	2.02419	1.39045
Cre02.g110100	10.1637	6.26006	10.8999	5.38488	7.3316	5.01956		1.62358	2.02417	1.46061
Cre06.g288950	10.9615	7.15751	12.475	6.1648	8.68508	6.35976		1.53147	2.02359	1.36563
Cre02.g147650	9.90058	3.98464	11.1133	5.49434	9.29097	4.29251		2.48469	2.02268	2.16446
Cre09.g390097	10.5314	6.49521	11.5619	5.71647	7.79929	6.06699		1.62141	2.02256	1.28553
Cre09.g417050	15.2092	6.93404	12.775	6.32117	14.854	7.60601		2.19341	2.02099	1.95293
Cre16.g686500	24.1834	14.466	25.986	12.8683	22.5319	13.5858		1.67174	2.01938	1.65849
Cre16.g652200	47.0499	13.3188	86.4419	42.8423	66.908	36.8531		3.53259	2.01768	1.81553
Cre04.g217947	16.3044	4.9975	12.9481	6.42714	13.9759	8.39125		3.26251	2.0146	1.66553
Cre12.g485850	70.2385	43.0704	91.0756	45.3075	74.7051	38.0904		1.63078	2.01017	1.96126
Cre12.g541400	67.7245	15.8242	45.0281	22.4265	55.6571	15.3015		4.27981	2.00781	3.63736
Cre06.g302305	14.9169	8.18783	14.6074	7.27956	14.3082	6.66646		1.82184	2.00663	2.1463
Cre03.g202400	39.6025	22.8211	42.0766	20.9811	40.6371	22.7488		1.73535	2.00545	1.78634
Cre10.g431450	8.03005	5.2733	9.5886	4.78635	9.40417	7.63724		1.52278	2.00332	1.23136
Cre17.g717950	319.389	112.814	168.219	83.988	72.3678	61.3769		2.83111	2.00289	1.17907
Cre02.g110600	7.76818	5.30524	11.1144	5.55267	9.66841	6.18339		1.46425	2.00163	1.56361
Cre17.g706650	29.7208	15.6943	33.3382	16.6567	42.0095	16.2199		1.89373	2.00149	2.59
Cre02.g103550	522.986	311.226	591.655	296.041	478.911	277.09		1.68041	1.99856	1.72836
Cre07.g352300	4.59275	4.98365	10.6756	5.34248	5.51869	5.70706		0.921564	1.99825	0.966994
Cre07.g321951	9.01487	6.09533	13.2145	6.63147	8.94085	6.13113		1.47898	1.9927	1.45827
Cre05.g245150	15.0128	10.3487	17.6779	8.91485	12.0672	8.73986		1.45069	1.98297	1.38071
Cre09.g407700	615.3	305.195	504.317	254.395	426.958	333.719		2.01609	1.98242	1.27939
Cre04.g215600	31.4713	15.2194	28.4568	14.3619	22.469	17.1001		2.06784	1.98141	1.31397
Cre16.g651400	11.0921	6.23483	10.7092	5.40875	6.94504	4.92066		1.77905	1.97998	1.4114
Cre13.g569150	22.3196	5.77194	25.5827	12.9284	32.4028	12.6738		3.86691	1.9788	2.55668
Cre07.g354900	12.103	6.21686	9.94952	5.03009	10.4252	4.96035		1.9468	1.978	2.10171
Cre12.g531700	20.8919	14.4277	26.1906	13.2479	17.049	14.0428		1.44804	1.97696	1.21407
Cre03.g160100	58.1607	25.0348	51.6203	26.1314	43.4512	24.3961		2.32319	1.97541	1.78107
Cre08.g366650	4.16261	5.11668	10.35	5.24079	5.03652	5.80522		0.813537	1.97489	0.867585
Cre17.g717300	11.4405	12.5238	22.7399	11.5601	9.03735	13.0347		0.913501	1.9671	0.69333
Cre04.g219900	15.7757	8.89962	16.9755	8.63086	15.3175	8.78733		1.77263	1.96684	1.74313
Cre03.g151500	9.71662	6.08713	11.6256	5.91228	8.51316	5.60166		1.59626	1.96635	1.51976
Cre07.g329150	9.64984	5.05237	10.3281	5.25376	7.97106	5.73966		1.90996	1.96585	1.38877
Cre07.g355050	9.73175	6.38914	12.6256	6.42375	9.88701	5.01788		1.52317	1.96546	1.97036
Cre09.g390134	9.47302	5.57884	12.8521	6.53955	9.07644	5.99202		1.69803	1.96529	1.51475
Cre06.g286950	22.9504	9.11238	16.8056	8.55155	20.0374	10.2454		2.5186	1.96521	1.95575
Cre10.g428800	49.294	25.0484	50.8388	25.8723	41.1223	25.1226		1.96795	1.96499	1.63686
Cre04.g219925	104.405	61.7669	127.452	64.9132	79.1151	59.6866		1.69031	1.96342	1.32551
Cre07.g320600	32.8623	13.115	21.4177	10.9249	37.5684	13.1211		2.5057	1.96045	2.86321
Cre06.g266800	6.70661	5.07778	11.0472	5.63603	8.98326	7.23232		1.32078	1.9601	1.2421
Cre50.g761497	12.7076	8.27612	16.4962	8.41958	10.0125	6.41619		1.53545	1.95927	1.56051
Cre01.g041400	11.2917	7.92511	14.6993	7.51409	8.20632	7.86317		1.4248	1.95623	1.04364
Cre07.g332300	25.9619	17.7019	30.4141	15.5544	25.0213	20.5545		1.46662	1.95534	1.21731
Cre16.g677250	18.1654	9.51598	15.9705	8.17953	13.3895	9.58691		1.90894	1.9525	1.39664
lower transcript abundance in CRR1 after 6h of anoxic conditions vs. 0h
Cre06.g280950	27.7917	47.4605	21.4447	41.8282	22.7285	36.1987		0.585575	0.512685	0.627882
Cre06.g304350	220.607	372.42	197.419	385.351	290.186	349.883		0.592361	0.51231	0.82938
Cre17.g734516	13.7252	24.2737	12.5317	24.4924	21.5719	31.6166		0.565435	0.511657	0.682297
Cre16.g657350	34.2022	64.3198	29.9121	58.4709	34.0107	60.4643		0.531752	0.511572	0.562492
Cre17.g719600	7.23133	16.2439	11.1423	21.7959	11.1603	19.8889		0.445172	0.511211	0.561132
Cre04.g220350	25.8822	30.4357	14.1237	27.6453	24.1904	30.4892		0.85039	0.51089	0.793409
Cre02.g106300	9.96718	25.5954	12.4348	24.3426	13.5104	29.6073		0.389413	0.510825	0.45632
Cre17.g731300	20.3404	34.1625	17.2714	33.8241	26.1087	36.2044		0.595401	0.510624	0.721147
Cre06.g262850	12.9332	20.5407	11.3693	22.3017	18.8597	22.2604		0.629638	0.509795	0.847231
Cre12.g497850	25.1609	51.3096	28.331	55.5917	31.7707	45.9927		0.490374	0.509626	0.690777
Cre14.g630835	82.4303	136.911	58.412	114.632	73.7688	96.7435		0.602072	0.509561	0.762519
Cre02.g119700	7.87269	12.3625	6.22323	12.229	9.57387	19.8831		0.63682	0.508891	0.481508
Cre09.g404000	60.8575	128.383	66.842	131.375	83.77	144.159		0.474031	0.508788	0.581094
Cre06.g278169	15.7363	31.0477	17.6105	34.6369	13.3259	26.9588		0.506843	0.508432	0.494306
Cre16.g685277	13.3414	18.2955	9.37369	18.4375	16.3047	20.2077		0.729218	0.508404	0.806856
Cre12.g529100	57.5133	101.718	54.4817	107.26	64.4076	104.234		0.565419	0.507941	0.617914
Cre03.g183100	65.8274	176.065	91.7697	180.707	159.367	199.924		0.373881	0.507837	0.797138
Cre01.g013350	62.227	126.18	61.9182	121.957	109.068	134.692		0.493161	0.507705	0.809759
Cre07.g324600	34.5027	59.7401	30.6997	60.469	33.2365	51.3149		0.577547	0.507693	0.647697
Cre12.g527650	10.4289	11.5901	5.64231	11.118	11.5652	13.0945		0.899811	0.507493	0.883211
Cre16.g682900	26.8521	55.9466	30.3549	59.8314	33.9727	54.5465		0.479959	0.507341	0.622821
Cre14.g628350	10.1492	20.3558	11.1655	22.0139	16.6402	20.7516		0.49859	0.507202	0.801876
Cre01.g043100	13.0872	16.9133	9.03268	17.8248	14.7089	18.1072		0.773782	0.506748	0.812323
Cre04.g220200	10.0052	27.3537	14.2932	28.2147	8.24117	23.2284		0.365771	0.506587	0.354789
Cre10.g423950	12.8578	20.8419	10.4611	20.6519	12.8239	19.9575		0.616921	0.506544	0.64256
Cre12.g537226	7.24948	9.41354	8.54207	16.8644	9.77406	16.1231		0.770112	0.506515	0.606215
Cre03.g158750	29.3627	56.5706	28.515	56.3105	23.6181	49.3673		0.519045	0.506389	0.478416
Cre11.g467576	35.3083	51.7655	23.9133	47.2474	42.9922	53.5612		0.682082	0.506129	0.802674
Cre03.g155300	22.3679	25.0534	14.1892	28.0703	28.9651	26.5525		0.892809	0.505488	1.09086
Cre05.g245102	20.5829	42.7357	20.3542	40.2686	28.6234	46.6136		0.481632	0.505461	0.614057
Cre03.g175750	9.43861	16.9867	8.94026	17.6917	10.622	17.213		0.555647	0.505336	0.617092
Cre07.g345700	6.29153	12.9328	5.56722	11.0171	5.59934	11.2		0.486479	0.505325	0.499941
Cre16.g687182	16.733	15.1796	7.06363	13.9822	11.2398	8.60037		1.10233	0.505187	1.3069
Cre09.g387467	21.7358	33.8666	18.0823	35.8014	26.7618	37.6687		0.641806	0.505072	0.710452
Cre15.g637501	8.37618	14.1217	6.8159	13.504	10.0341	12.2542		0.593142	0.504732	0.818829
Cre03.g168500	6.7792	11.7362	6.93533	13.7433	7.039	12.691		0.577632	0.504634	0.554645
Cre02.g074550	10.3467	24.3541	12.5879	24.9451	15.8598	25.6158		0.424844	0.504624	0.619141
Cre07.g357800	6.38973	12.9416	6.4255	12.735	7.91308	14.5226		0.493736	0.504554	0.54488
Cre01.g054350	8.51433	24.0138	10.3856	20.603	10.5603	25.3402		0.35456	0.504082	0.416741
Cre06.g293750	4.4191	12.677	6.4093	12.7158	5.96956	12.3763		0.348592	0.504042	0.482338
Cre06.g308600	57.3377	90.4621	52.6337	104.492	99.2929	99.2668		0.633831	0.50371	1.00026
Cre16.g688450	6.47422	10.6754	5.12318	10.1802	8.04254	12.7566		0.606462	0.503249	0.630461
Cre16.g677850	5.71242	14.5766	5.99696	11.9202	6.75207	14.1221		0.39189	0.503092	0.478121
Cre14.g615000	53.7348	84.2317	47.0142	93.5633	78.7805	100.795		0.63794	0.502485	0.781591
Cre13.g605150	94.9215	124.845	62.8574	125.093	109.134	127.557		0.760315	0.502485	0.85557
Cre07.g347250	12.9776	20.461	11.0455	22.0087	15.1231	22.2717		0.63426	0.50187	0.679028
Cre02.g118900	10.8387	23.8038	12.0976	24.1068	14.8959	26.2158		0.455335	0.501834	0.568203
Cre01.g001983	65.8149	90.9776	38.2412	76.2281	43.7883	86.17		0.723419	0.501668	0.508162
Cre04.g217921	32.5313	43.4871	22.6589	45.1724	25.9805	41.5439		0.748068	0.501609	0.625375
Cre05.g233100	8.75639	8.7196	4.83389	9.64498	12.1139	9.36573		1.00422	0.501182	1.29343
Cre06.g251900	12.021	25.3061	9.16894	18.2984	17.1564	20.1528		0.475024	0.501079	0.851316
Cre03.g188450	7.33489	12.8773	7.64934	15.268	10.6859	12.6226		0.569598	0.501005	0.846569
Cre02.g119550	368.657	569.323	317.867	634.853	487.532	591.434		0.647536	0.500694	0.824322
Cre04.g225600	8.21978	13.2437	6.15497	12.2975	8.22289	13.9694		0.620656	0.500506	0.588636
Cre14.g626200	19.8705	26.4232	14.0157	28.0077	28.7243	28.641		0.75201	0.500423	1.00291
Cre12.g555350	13.8734	27.3223	15.3543	30.6905	19.9167	26.0996		0.507768	0.500295	0.763104
Cre14.g617550	29.0166	37.2069	19.7608	39.5023	27.7235	32.9685		0.779871	0.500244	0.840909
Cre02.g079700	22.0723	44.7807	25.6673	51.3166	22.6758	44.0524		0.492898	0.500175	0.514746
Cre12.g520300	9.78016	12.2863	6.7941	13.5849	10.3191	14.1786		0.796022	0.500121	0.727794
Cre05.g248500	31.9749	58.8018	30.0873	60.169	40.4809	58.2891		0.543774	0.500047	0.694485
Cre07.g342352	16.7039	37.9708	20.0668	40.1342	19.2436	34.2708		0.439914	0.499993	0.561516
Cre01.g032650	145.775	195.774	76.5354	153.177	98.1132	119.569		0.744609	0.499653	0.820557
Cre10.g461900	11.9264	20.385	9.54897	19.1328	15.8239	22.1159		0.585058	0.499089	0.715499
Cre04.g214500	81.355	110.062	54.8013	109.832	53.4162	98.5445		0.739174	0.498956	0.542052
Cre06.g257450	388.061	651.755	387.854	778.379	519.19	723.938		0.595409	0.498284	0.717175
Cre16.g651550	54.5525	115.717	58.35	117.152	63.0034	106.316		0.47143	0.498071	0.592605
Cre09.g402812	24.5311	55.4782	26.8424	53.9505	26.347	55.0649		0.442175	0.497538	0.478472
Cre09.g397950	7.82162	12.6371	7.17315	14.4279	11.0496	13.4025		0.618941	0.497172	0.824443
Cre07.g312300	29.8289	56.2008	21.7616	43.7737	40.6732	59.7119		0.530756	0.497139	0.681157
Cre16.g692050	11.6153	16.5009	8.22445	16.5442	10.4537	16.9032		0.703919	0.49712	0.618445
Cre01.g042800	25.9404	54.2586	25.625	51.5537	29.7672	54.7984		0.478088	0.497055	0.543213
Cre05.g241100	11.7015	23.5108	13.332	26.8229	16.6606	23.5217		0.497707	0.497038	0.708308
Cre11.g467700	132.477	278.994	112.055	225.479	171.23	262.628		0.474838	0.496964	0.651987
Cre17.g736900	15.8845	21.4443	11.4997	23.1549	17.4533	20.4732		0.740733	0.496642	0.852495
Cre05.g242000	39.8703	81.6212	35.8858	72.3215	49.3155	69.342		0.48848	0.496198	0.711192
Cre07.g331550	92.8642	167.663	82.7099	166.69	103.413	172.116		0.553874	0.49619	0.600833
Cre11.g468359	44.1622	38.3787	25.5148	51.4319	68.2142	43.8746		1.1507	0.496089	1.55475
Cre12.g523150	30.0535	64.0363	36.9287	74.4448	39.4015	62.4104		0.46932	0.496055	0.631329
Cre11.g478750	27.1864	37.8726	22.5546	45.4692	34.2075	45.8755		0.717838	0.496041	0.745659
Cre06.g250950	39.2454	66.0649	37.1536	74.9761	41.3156	64.9613		0.594043	0.495539	0.636003
Cre13.g566700	29.7141	62.098	38.5572	77.9089	39.4609	67.8763		0.478503	0.494901	0.581365
Cre06.g278107	9.81195	10.3361	7.00655	14.1679	10.0968	21.4339		0.949289	0.494537	0.471067
Cre09.g415900	8.09693	10.9324	4.99186	10.0973	10.1951	10.4874		0.740636	0.494376	0.972128
Cre11.g467647	8.91714	15.4622	8.67649	17.5529	11.8098	17.6539		0.576706	0.494305	0.668963
Cre02.g143567	13.9338	29.1273	19.0068	38.4695	17.2977	34.1302		0.478376	0.494075	0.506815
Cre02.g091050	140.176	196.397	93.9119	190.17	170.789	178.622		0.713738	0.493831	0.956148
Cre18.g748447	18.74	37.1249	19.0217	38.5416	19.8624	41.3158		0.504783	0.493537	0.480746
Cre11.g477850	14.3644	20.4617	10.592	21.4626	12.6999	19.0544		0.702014	0.49351	0.666507
Cre04.g223225	13.6866	20.7768	8.12231	16.4586	11.7278	19.613		0.658744	0.493499	0.597961
Cre17.g702550	15.4714	27.6746	15.5514	31.5251	19.2403	28.6856		0.559047	0.493302	0.67073
Cre09.g404950	10.4431	12.7712	5.61786	11.393	10.8588	10.0556		0.817707	0.493098	1.07988
Cre07.g340750	8.26461	15.6138	7.2545	14.7127	10.0774	16.7967		0.529314	0.493077	0.599963
Cre06.g262100	13.5757	20.2799	10.6493	21.5988	16.9999	24.2978		0.669417	0.493051	0.699648
Cre01.g048150	48.6717	97.6565	58.1261	117.9	41.5266	102.894		0.498397	0.493012	0.403586
Cre02.g082500	618.811	923.949	433.715	879.834	827.255	927.661		0.669746	0.492951	0.891764
Cre03.g181250	12.0185	18.4938	7.91421	16.0617	17.969	20.8234		0.649866	0.492738	0.862923
Cre08.g358500	9.15034	13.867	7.53163	15.2878	10.8727	11.4629		0.659864	0.492656	0.948512
Cre03.g180850	18.2243	24.8804	11.0686	22.478	15.1299	22.6619		0.732476	0.492419	0.667636
Cre02.g097213	8.77833	9.2288	4.74733	9.64399	7.2195	6.46676		0.951189	0.492258	1.1164
Cre11.g480100	12.0453	33.7751	13.6521	27.7418	13.2312	26.2876		0.356633	0.492113	0.503325
Cre08.g359600	17.8554	22.2779	8.74045	17.7677	14.7147	21.667		0.801485	0.491929	0.67913
Cre09.g401293	13.5803	21.7567	8.79332	17.8953	8.37229	17.3018		0.624189	0.491376	0.483897
Cre06.g278203	5.67833	9.88325	4.74332	9.65323	4.93989	9.51104		0.574541	0.491371	0.519385
Cre01.g016150	7.66875	14.2641	7.54814	15.3726	10.8147	14.8789		0.537626	0.491013	0.726848
Cre13.g571150	85.6293	151.769	85.2487	173.628	110.422	128.253		0.564208	0.490985	0.86097
Cre04.g231124	40.9096	59.606	33.0525	67.4885	47.3692	72.0901		0.686334	0.48975	0.657083
Cre06.g278086	22.6816	35.4681	21.0109	42.9136	30.8131	36.6699		0.639493	0.489609	0.840283
Cre03.g191050	82.8027	145.595	72.1626	147.403	98.5792	157.192		0.568719	0.48956	0.627126
Cre13.g567600	164.991	307.093	160.605	328.091	223.1	288.525		0.537267	0.489514	0.773243
Cre02.g147100	58.8769	64.3555	35.1403	71.7916	86.5974	60.5889		0.91487	0.489476	1.42926
Cre03.g189250	40.19	66.6266	32.5929	66.5954	46.2403	65.1499		0.603213	0.489417	0.709752
Cre07.g337150	9.62545	19.7597	9.9584	20.3562	14.6981	24.0453		0.487125	0.489207	0.611267
Cre07.g350400	6.77777	13.5515	6.16768	12.6206	11.3031	13.6525		0.500149	0.488699	0.827914
Cre16.g675861	18.4202	35.3637	17.3991	35.6287	22.5349	32.6565		0.520879	0.488345	0.690059
Cre05.g233800	60.4739	92.9519	44.3993	90.9261	50.0418	93.4102		0.650593	0.488301	0.535721
Cre02.g118850	242.79	351.812	195.354	400.207	339.88	370.926		0.690113	0.488132	0.916301
Cre08.g375650	6.47857	13.1533	6.93762	14.2148	9.04442	15.9086		0.492543	0.488056	0.568524
Cre01.g003376	5.98532	11.6544	5.70725	11.6966	5.28205	11.637		0.513567	0.487941	0.453901
Cre03.g207700	14.173	32.7779	14.7399	30.2111	19.6724	33.8346		0.432395	0.487897	0.581428
Cre10.g427250	64.6427	99.4126	56.9081	116.703	81.5957	140.908		0.650247	0.487632	0.579071
Cre09.g392467	64.8583	105.585	52.1106	106.874	70.59	107.747		0.614276	0.487589	0.655146
Cre13.g589700	5.93006	14.2583	6.32965	12.9827	7.46877	13.4257		0.415902	0.487545	0.556304
Cre11.g468950	230.788	439.089	248.323	510.113	372.052	394.335		0.525606	0.4868	0.943492
Cre09.g394450	34.395	57.6867	33.4178	68.656	39.8816	63.1345		0.596238	0.486743	0.631693
Cre02.g113100	24.6463	42.4374	20.2504	41.6202	29.399	38.3607		0.580768	0.486552	0.766383
Cre09.g391900	282.57	403.538	224.612	461.781	365.088	404.337		0.700231	0.486404	0.90293
Cre12.g509800	12.5511	15.7286	7.91915	16.2877	12.3272	13.8685		0.797979	0.486204	0.888863
Cre06.g260950	11.4385	18.5293	8.79067	18.0822	11.9598	23.2603		0.61732	0.48615	0.514172
Cre17.g730600	9.04355	13.6207	5.4519	11.2149	6.47173	12.2307		0.663956	0.48613	0.529138
Cre14.g629300	4.10678	11.8655	6.14936	12.6501	3.13845	10.1438		0.346111	0.486112	0.309396
Cre06.g297750	19.533	40.9914	21.4144	44.1189	20.6361	41.5593		0.476515	0.485379	0.496546
Cre09.g409901	25.342	24.0995	15.9665	32.9008	39.8741	28.017		1.05156	0.485292	1.42321
Cre09.g398178	15.0265	16.5869	6.61587	13.6351	13.1139	14.8688		0.905926	0.485209	0.881974
Cre09.g389100	11.4925	14.8885	8.42986	17.3809	14.8137	14.1534		0.771904	0.485007	1.04665
Cre17.g703700	22.2724	43.4427	16.342	33.7375	22.7917	37.7188		0.512685	0.484387	0.604253
Cre16.g683300	4.89241	9.99217	5.61302	11.6075	9.80957	12.4331		0.489624	0.483568	0.788988
Cre01.g011500	17.9762	34.145	19.1784	39.739	24.0492	40.5738		0.526467	0.482609	0.592727
Cre06.g300750	6.54252	12.1551	6.07758	12.6005	5.66923	12.4564		0.538253	0.482328	0.455126
Cre17.g729150	43.3199	63.7001	33.7574	69.9941	39.4958	54.3953		0.68006	0.482289	0.726088
Cre01.g053600	7.53718	10.7158	5.06334	10.4998	7.66236	10.788		0.703371	0.482232	0.710267
Cre10.g446200	5.31937	13.2839	5.70464	11.8342	5.92335	11.3346		0.400437	0.482047	0.52259
Cre17.g721500	113.821	200.066	80.9121	167.943	99.4243	237.981		0.568917	0.481783	0.417783
Cre03.g193800	25.8212	56.6074	28.5576	59.2843	29.6406	65.0364		0.456145	0.481706	0.455754
Cre06.g308850	40.6018	70.7826	37.8932	78.6978	44.511	72.1151		0.573613	0.481503	0.617222
Cre12.g554850	47.7655	69.4384	39.0534	81.1288	66.6982	72.4167		0.687883	0.481375	0.921033
Cre16.g687742	24.4132	32.4067	13.0981	27.2317	9.01561	23.4424		0.753338	0.480987	0.384586
Cre16.g677026	58.3579	112.6	49.5044	103.038	60.4512	100.79		0.518276	0.480448	0.599774
Cre06.g303200	71.0484	89.0994	45.7529	95.2583	62.0071	74.1878		0.797406	0.480304	0.835813
Cre06.g272050	62.6457	121.253	50.9565	106.099	72.5714	112.172		0.516653	0.480273	0.646965
Cre03.g193750	47.714	120.485	55.2109	114.998	50.1746	123.727		0.396016	0.480103	0.405527
Cre14.g620300	25.978	44.8927	22.5614	47.017	30.4688	46.3058		0.578669	0.479856	0.657991
Cre14.g625650	37.3271	30.6783	14.3274	29.866	23.3906	21.4038		1.21673	0.479723	1.09282
Cre15.g635850	167.15	242.363	105.65	220.334	174.763	248.633		0.689668	0.479499	0.702895
Cre01.g014000	37.5611	102.492	47.3015	98.7144	55.9997	105.707		0.366478	0.479175	0.529763
Cre14.g625400	16.3259	28.7765	15.4615	32.2744	23.9963	41.6016		0.567334	0.479064	0.576812
Cre12.g502750	40.3994	72.8133	40.1983	83.9285	50.7172	76.2503		0.554835	0.478959	0.665141
Cre06.g288750	8.77168	15.3735	7.83074	16.3573	8.04216	13.0303		0.570571	0.478731	0.617189
Cre12.g546250	8.65185	17.3137	9.32603	19.4984	11.0059	18.1374		0.499711	0.478297	0.606807
Cre15.g636750	31.096	61.2028	30.1425	63.0662	43.7999	53.8344		0.508081	0.47795	0.813604
Cre02.g144450	28.8136	39.5799	18.897	39.5591	24.5729	34.9528		0.727986	0.47769	0.703031
Cre02.g093650	143.354	301.202	136.754	286.316	225.54	268.588		0.47594	0.477633	0.839725
Cre03.g204601	140.553	191.829	85.0536	178.112	124.817	206.178		0.732699	0.477529	0.605385
Cre09.g393173	83.0594	179.3	102.975	215.678	122.021	166.256		0.463243	0.477448	0.733934
Cre03.g144767	8.82534	16.9259	9.30485	19.4901	9.79044	20.0687		0.52141	0.477414	0.487846
Cre12.g510250	29.4315	55.2258	26.657	55.8892	36.6716	49.0523		0.53293	0.476962	0.747602
Cre16.g691850	235.649	389.94	205.42	430.866	349.319	339.313		0.604321	0.476761	1.02949
Cre16.g687200	21.9433	32.4327	20.3131	42.6106	33.4785	43.8353		0.67658	0.476715	0.763734
Cre16.g683600	21.9783	26.9142	13.9985	29.3834	27.1885	21.3549		0.816606	0.476408	1.27317
Cre10.g429100	30.0879	57.0835	30.3693	63.7521	36.2567	74.4363		0.527086	0.476365	0.487084
Cre11.g468750	75.0889	138.756	83.4371	175.19	107.585	145.686		0.541158	0.476266	0.738472
Cre01.g042550	12.7063	25.7398	11.5166	24.1819	14.3991	25.966		0.493644	0.476249	0.554537
Cre12.g551500	7.48674	9.93348	5.11748	10.7477	7.19721	10.211		0.753688	0.476147	0.704849
Cre02.g108050	6.2798	9.42411	5.32084	11.1866	10.803	11.2311		0.666355	0.475644	0.961883
Cre09.g398900	537.124	610.325	253.082	532.154	197.447	433.132		0.880062	0.47558	0.455859
Cre02.g091150	7.57224	10.7283	5.31822	11.196	7.2966	10.7543		0.705819	0.475011	0.678482
Cre10.g464600	19.262	43.5176	24.0407	50.6293	26.1877	47.6267		0.442626	0.474838	0.549853
Cre09.g415700	39.9635	110.139	48.4074	101.961	55.7421	119.519		0.362846	0.474764	0.466387
Cre02.g093300	6.27136	12.182	5.98976	12.6175	6.54387	11.9446		0.514805	0.474718	0.547852
Cre01.g031200	11.062	19.1387	9.40758	19.8267	13.8791	19.1134		0.577991	0.47449	0.726145
Cre12.g558750	9.3482	16.325	8.70095	18.3507	11.3659	16.2091		0.572631	0.474148	0.701205
Cre13.g581600	111.487	200.578	92.5728	195.276	120.247	184.865		0.555829	0.474061	0.650458
Cre08.g376350	8.98166	12.4891	6.88632	14.5303	14.2094	14.9121		0.71916	0.473928	0.952877
Cre06.g281800	16.8472	38.0571	15.5872	32.9249	16.8257	43.5827		0.442682	0.473417	0.386064
Cre12.g533351	6.19884	12.6918	6.41423	13.5508	6.08523	13.3613		0.488413	0.473347	0.455437
Cre10.g430000	29.6478	48.717	24.6383	52.1204	34.9418	46.771		0.608572	0.472719	0.747083
Cre07.g355150	2.49338	10.4734	5.89214	12.4668	101.366	81.1489		0.238068	0.472626	1.24914
Cre01.g034451	12.1187	20.8861	10.7706	22.7981	15.6938	26.5929		0.580228	0.472434	0.59015
Cre16.g650550	778.713	1199.72	807.111	1710.53	1031.55	1113.88		0.649079	0.471848	0.926087
Cre16.g651500	6.94109	14.4376	7.29637	15.4744	9.3886	18.1899		0.480765	0.471512	0.516144
Cre14.g615850	4.94301	9.64646	4.96145	10.5227	5.69378	8.39783		0.512417	0.4715	0.678006
Cre09.g402450	24.9163	38.7944	18.7137	39.7026	31.2108	47.4638		0.642265	0.471347	0.657571
Cre07.g328750	51.2354	64.7359	36.961	78.5189	80.3022	68.3666		0.791453	0.470727	1.17458
Cre03.g145967	23.4239	55.8472	26.6684	56.6572	29.0274	58.0786		0.419428	0.470697	0.499795
Cre07.g357200	48.4975	45.2371	19.0993	40.5926	24.0068	46.1193		1.07207	0.470512	0.520537
Cre12.g514200	25.9351	66.2496	28.1772	59.9326	29.0031	63.1854		0.391476	0.470148	0.459016
Cre01.g034000	21.2448	40.4774	19.6631	41.829	21.9599	41.4827		0.524856	0.470083	0.529375
Cre06.g292500	11.355	21.9873	11.4634	24.3899	25.9077	25.7148		0.516434	0.470006	1.0075
Cre03.g167051	13.9586	28.136	15.9798	34.0039	11.4879	32.1223		0.496112	0.46994	0.35763
Cre09.g405100	48.8464	149.947	50.4368	107.366	25.3226	79.8251		0.325758	0.469765	0.317226
Cre07.g330750	20.9233	19.7091	12.0765	25.7541	32.4975	21.5537		1.06161	0.468916	1.50775
Cre09.g397660	24.6622	19.0056	14.0712	30.0253	59.0655	40.6179		1.29763	0.468645	1.45417
Cre06.g250450	41.7626	84.0119	40.9455	87.3947	36.9837	92.1833		0.497103	0.468512	0.401197
Cre13.g575900	12.5661	20.9846	10.2925	21.97	14.5301	19.7094		0.598825	0.46848	0.737217
Cre17.g704600	64.7373	73.5466	33.975	72.5587	80.5602	73.8863		0.880222	0.468242	1.09033
Cre02.g103700	18.3902	28.3906	14.1392	30.1992	21.431	29.3746		0.647757	0.468198	0.729576
Cre07.g322500	8.40081	13.7606	7.47407	15.9837	8.74263	12.2893		0.610497	0.467606	0.711402
Cre16.g670800	34.5069	70.5092	35.1873	75.2758	51.6509	66.3249		0.489396	0.467445	0.778756
Cre13.g579150	6.3893	11.9193	4.85118	10.3906	7.20998	9.38738		0.536047	0.466882	0.76805
Cre13.g588310	10.4535	20.3084	10.1543	21.7547	12.6665	19.6932		0.514738	0.466764	0.643192
Cre03.g155550	8.54129	17.0654	5.89686	12.6507	10.2227	14.2343		0.500503	0.466129	0.718174
Cre17.g730250	28.5052	47.0353	30.2167	64.8296	34.213	61.0797		0.606038	0.466094	0.560137
Cre03.g212977	3.01205	14.8795	6.53951	14.0338	4.78061	20.2551		0.20243	0.465983	0.23602
Cre07.g342250	18.032	39.4183	18.557	39.836	24.9206	38.8944		0.457453	0.465835	0.640725
Cre14.g630859	25.9023	38.0131	14.7834	31.7495	21.8124	26.3889		0.681405	0.465626	0.826575
Cre13.g561850	7.69731	13.4781	6.65141	14.285	12.2995	16.5863		0.571098	0.465622	0.741546
Cre07.g325755	55.3739	79.9387	38.826	83.4402	86.1461	89.2729		0.692705	0.465315	0.964975
Cre12.g530100	14.7554	28.7644	12.1703	26.2121	18.547	28.5351		0.512974	0.464301	0.649971
Cre12.g552300	27.1595	48.189	22.3374	48.1451	12.8383	44.9085		0.563604	0.46396	0.285877
Cre07.g340900	6.28931	10.6592	5.10369	11.0007	15.2729	20.5441		0.590036	0.463942	0.74342
Cre17.g733250	24.3309	50.0921	21.6261	46.6178	33.1376	47.301		0.485723	0.463902	0.700569
Cre09.g404400	9.36848	19.7279	8.98056	19.3667	11.3799	20.3065		0.474885	0.463711	0.560407
Cre03.g176100	28.5432	49.6223	22.0446	47.5644	36.0545	48.3985		0.575209	0.463468	0.744951
Cre16.g673109	137.594	275.149	142.551	307.632	175.281	269.975		0.500071	0.463382	0.649249
Cre16.g682650	14.4517	26.5996	12.1501	26.2334	16.2219	25.0552		0.543305	0.463154	0.647446
Cre16.g650100	908.009	1538.88	672.526	1452.1	1195.03	1529.64		0.590045	0.46314	0.781249
Cre07.g351800	9.95953	13.035	7.43288	16.0541	27.0238	19.9851		0.764061	0.46299	1.3522
Cre16.g662150	15.1898	32.4319	16.2641	35.1711	13.7422	30.3164		0.46836	0.462428	0.453293
Cre12.g519050	30.2298	49.5801	22.0919	47.783	38.5681	46.9322		0.609716	0.462338	0.821783
Cre09.g402650	5.53055	10.7088	4.9566	10.7219	7.55535	12.3601		0.516449	0.462287	0.611269
Cre07.g315150	59.7962	113.442	57.8828	125.252	75.1544	111.661		0.527108	0.462131	0.673059
Cre01.g051900	100.126	199.456	89.9219	194.781	119.12	194.713		0.501995	0.461656	0.611772
Cre06.g281150	12.2345	24.121	11.888	25.7578	13.1125	20.9392		0.507214	0.46153	0.626218
Cre09.g405200	5.19589	11.9421	5.8852	12.7543	6.7172	13.048		0.43509	0.461429	0.514807
Cre03.g197100	13.1993	26.7507	10.2343	22.1812	12.1033	19.7845		0.493419	0.461395	0.611757
Cre17.g725301	10.0774	20.3219	9.49598	20.5843	9.80637	19.5684		0.495889	0.461321	0.501133
Cre06.g302800	20.5555	40.8646	18.8734	41.0406	21.1219	41.5534		0.503015	0.459871	0.508307
Cre12.g536100	100.382	121.789	68.4438	148.846	103.691	119.619		0.824229	0.45983	0.866844
Cre12.g546500	5.04524	28.5606	9.38091	20.4198	14.3094	53.3497		0.17665	0.459403	0.268219
Cre09.g411666	6.29949	14.7509	6.78993	14.7952	5.82193	14.058		0.427058	0.458928	0.414136
Cre01.g019750	5.39888	10.7763	5.22373	11.3926	6.80415	13.044		0.500996	0.45852	0.521631
Cre17.g732850	9.57374	18.0241	8.66722	18.9268	12.8458	20.3695		0.531163	0.457934	0.630639
Cre16.g675958	35.0297	49.8384	22.6658	49.4976	32.3399	53.6059		0.702866	0.457917	0.60329
Cre12.g523200	24.0985	44.549	21.0361	45.9497	29.0377	48.01		0.540944	0.457807	0.604826
Cre10.g446700	6.95314	11.3556	4.73709	10.3518	6.22624	11.4139		0.612309	0.45761	0.545496
Cre12.g499352	9.20086	17.1627	8.83643	19.3514	8.61443	14.3445		0.536096	0.45663	0.600539
Cre06.g252700	7.34296	16.571	8.1644	17.8816	9.13212	16.9729		0.443121	0.456581	0.538041
Cre03.g190500	18.938	31.3954	15.1442	33.1796	22.4733	40.928		0.603209	0.456431	0.549094
Cre06.g262300	7.74501	11.1237	5.29009	11.5908	9.6141	16.1456		0.696262	0.456404	0.595463
Cre09.g386743	24.3886	35.4988	20.9397	45.9001	29.6148	35.1328		0.687026	0.456202	0.842939
Cre17.g741200	18.2179	26.1115	11.795	25.8823	27.0331	29.5191		0.697696	0.455717	0.915783
Cre06.g298350	48.2366	98.1242	43.9134	96.3793	62.0331	95.8168		0.491587	0.455631	0.647414
Cre01.g029450	10.0307	19.1485	9.97403	21.9025	10.6472	20.9641		0.523837	0.455383	0.507878
Cre09.g395350	213.87	344.819	175.664	385.851	271.835	288.373		0.620238	0.455264	0.942651
Cre12.g514850	24.9605	44.2017	21.5918	47.4391	29.8762	42.1135		0.564695	0.455148	0.709421
Cre03.g164101	15.7583	25.083	12.8614	28.2652	18.9375	27.8637		0.628246	0.455026	0.679648
Cre07.g323600	29.5343	62.5102	30.8121	67.7152	44.9116	66.5843		0.472472	0.455025	0.674507
Cre26.g756797	13.8003	23.484	13.4658	29.6241	17.9952	30.5088		0.587647	0.454556	0.589836
Cre02.g103100	5.98981	13.8539	6.24991	13.7502	9.46433	16.9068		0.432356	0.454532	0.559794
Cre10.g427150	8.88254	20.7288	11.8558	26.0879	9.96712	20.4777		0.428512	0.454456	0.48673
Cre16.g678200	13.9984	25.8086	10.0782	22.1796	11.165	20.2366		0.542393	0.454391	0.551723
Cre07.g321350	6.41492	11.4754	5.51589	12.1423	8.7696	13.3842		0.559015	0.454271	0.65522
Cre11.g467900	13.4538	20.6866	10.5266	23.1769	21.8457	23.5262		0.650363	0.454185	0.928569
Cre02.g076300	16.5305	45.7346	18.2922	40.2898	30.7727	41.5358		0.361444	0.454016	0.740872
Cre16.g675450	12.9739	21.8945	11.2203	24.7224	20.1461	24.2865		0.592564	0.453852	0.829518
Cre01.g002400	16.3932	26.9102	11.7556	25.9054	15.3744	27.3515		0.609182	0.45379	0.562104
Cre17.g705500	27.8521	28.6261	16.0653	35.4403	41.0705	31.1888		0.972962	0.453306	1.31683
Cre12.g516350	13.0369	24.2502	10.3717	22.8887	11.5073	19.2471		0.5376	0.453136	0.597872
Cre16.g679800	10.9312	21.4071	9.11216	20.1111	14.6714	25.5108		0.510634	0.453091	0.575105
Cre03.g144064	6.68856	14.8431	5.91242	13.0559	8.92197	10.5159		0.450617	0.452854	0.848427
Cre06.g263300	123.501	199.752	83.5271	184.496	83.4545	137.352		0.618272	0.452731	0.607596
Cre10.g439850	84.1967	105.386	44.2113	97.6646	93.1028	111.354		0.798936	0.452685	0.836097
Cre12.g495550	44.7341	54.0532	28.7279	63.5403	56.2855	46.1237		0.827594	0.452121	1.22032
Cre09.g393400	12.105	21.7113	8.70153	19.2627	15.9251	22.8403		0.557544	0.45173	0.697237
Cre14.g611150	26.9407	54.2539	29.037	64.323	34.9543	58.699		0.496567	0.451425	0.595484
Cre04.g217900	15.9037	27.7565	10.979	24.3209	16.0994	28.0991		0.572972	0.451422	0.572951
Cre02.g080700	61.3762	76.538	39.65	87.8921	54.6707	65.7983		0.801905	0.451121	0.830883
Cre12.g509750	75.3761	156.426	64.423	142.848	75.1779	148.678		0.481864	0.45099	0.505642
Cre03.g158600	7.62438	15.4148	6.79896	15.0925	7.66911	15.8474		0.494614	0.450486	0.483935
Cre02.g110750	6.95821	13.5518	5.77889	12.8294	9.36858	16.1033		0.513453	0.450441	0.58178
Cre02.g103500	5.15704	12.3661	5.44119	12.0803	5.52069	12.9362		0.41703	0.450418	0.426763
Cre02.g097650	13.7289	24.5549	11.7571	26.1116	19.7161	33.2667		0.55911	0.450263	0.592668
Cre10.g430501	17.0226	42.0462	19.723	43.8488	18.1433	38.0552		0.404855	0.449796	0.476763
Cre01.g049450	8.29024	16.6969	7.85067	17.4602	13.0964	17.0243		0.496514	0.449632	0.769277
Cre02.g114250	9.34414	17.8208	7.23868	16.1026	11.9345	17.4829		0.524339	0.449535	0.682638
Cre14.g608970	4.72166	9.24327	4.58001	10.1907	5.44737	8.98473		0.510821	0.44943	0.606292
Cre12.g498950	21.7036	39.3941	19.7029	43.8409	33.217	47.6817		0.550935	0.449418	0.69664
Cre04.g215850	20.7785	55.6419	22.7873	50.7052	26.2817	55.1444		0.373433	0.449408	0.476598
Cre06.g299150	53.7606	59.4336	28.6902	63.8519	41.8389	55.0962		0.904549	0.449324	0.759379
Cre17.g742200	19.3713	45.715	19.7523	44.0133	27.2238	49.3327		0.423741	0.44878	0.551841
Cre36.g759647	17.0091	29.6073	12.7392	28.3867	19.1785	29.5726		0.57449	0.448774	0.648523
Cre09.g405050	29.4816	66.3945	29.4329	65.5855	28.4813	60.7287		0.444037	0.448771	0.468992
Cre07.g325731	6.80696	12.5466	5.25393	11.7126	6.524	13.3217		0.542534	0.448571	0.489727
Cre07.g330450	6.78632	12.5537	5.99871	13.3746	8.46002	12.8621		0.540583	0.448515	0.657748
Cre14.g629050	14.1842	27.0423	12.2045	27.2193	12.1549	25.4579		0.524519	0.448377	0.477451
Cre06.g251300	11.106	22.2888	10.4896	23.3993	12.8342	19.1297		0.498277	0.448287	0.670904
Cre09.g414850	15.5425	14.3627	8.09303	18.0613	11.8034	17.2864		1.08214	0.448087	0.682814
Cre12.g514750	29.0533	52.0365	20.5021	45.7815	32.9363	54.333		0.558325	0.447825	0.606193
Cre02.g141500	59.6667	77.8582	39.749	88.7689	93.8911	98.6983		0.766351	0.447781	0.951294
Cre01.g023050	9.45295	14.0034	7.1323	15.9343	9.41431	15.2764		0.675047	0.447607	0.616265
Cre13.g589250	7.58702	15.3232	5.91823	13.2367	8.21751	14.9759		0.495133	0.447108	0.548716
Cre10.g419750	11.3398	21.7613	9.69741	21.6964	12.4115	22.6052		0.521099	0.446959	0.549055
Cre02.g073850	15.7406	22.814	12.0783	27.0492	25.4669	24.4787		0.689954	0.446531	1.04037
Cre12.g553678	21.511	42.0308	24.1351	54.0675	29.3814	44.4923		0.511791	0.446388	0.66037
Cre02.g142352	7.28507	16.4582	7.28168	16.3311	6.59691	13.3437		0.442641	0.445878	0.494384
Cre05.g241850	15.9875	24.3112	10.5602	23.6979	23.092	30.1908		0.657619	0.445618	0.764869
Cre17.g702200	15.4191	35.399	17.388	39.0471	25.2181	38.26		0.43558	0.445308	0.659124
Cre12.g510400	77.9577	208.871	98.0153	220.459	140.703	195.516		0.373234	0.444597	0.71965
Cre11.g481900	5.18524	9.29922	4.28742	9.64662	4.75235	9.16968		0.557599	0.444448	0.518268
Cre02.g079800	201.775	384.543	175.655	395.936	256.435	331.917		0.524714	0.443645	0.772588
Cre12.g501200	58.0464	120.924	56.019	126.282	79.9288	135.774		0.480024	0.443602	0.58869
Cre05.g244800	5.54316	12.6067	4.91011	11.0755	6.05727	11.661		0.4397	0.443331	0.519447
Cre03.g146187	34.1456	79.3374	34.4081	77.7558	42.3587	82.0554		0.430385	0.442515	0.516221
Cre01.g010450	23.7885	26.5246	14.8065	33.4684	34.0888	28.2903		0.896847	0.442402	1.20496
Cre13.g563100	117.753	129.303	56.7359	128.259	223.39	142.96		0.910675	0.442354	1.5626
Cre08.g361850	52.9506	99.0004	49.2677	111.447	68.4728	116.594		0.534852	0.442073	0.587276
Cre09.g409100	68.7197	106.453	45.7654	103.566	68.0865	106.909		0.64554	0.441896	0.636864
Cre12.g483950	239.756	421.994	182.653	413.437	315.152	443.564		0.56815	0.441792	0.710499
Cre06.g271650	4.4509	9.04007	4.61102	10.4514	6.40134	9.74937		0.492352	0.441187	0.65659
Cre12.g514900	30.9847	68.7879	31.5075	71.4406	42.4323	66.4334		0.450438	0.441031	0.638719
Cre10.g439350	20.249	41.581	20.9753	47.609	30.2652	48.6018		0.486977	0.440574	0.622718
Cre01.g062172	3.78867	11.5272	6.76933	15.3778	7.05686	6.27118		0.328672	0.440201	1.12528
Cre12.g535900	17.1682	24.7706	13.0836	29.7537	17.1779	25.1525		0.693088	0.43973	0.68295
Cre11.g467617	24.3902	37.3842	16.5865	37.7502	33.1269	50.4636		0.65242	0.439375	0.656451
Cre06.g269950	46.7075	68.6349	27.9041	63.6231	47.2423	70.2016		0.680521	0.438584	0.672952
Cre06.g279100	17.9275	29.6464	16.6006	37.852	26.3629	29.1355		0.604711	0.438566	0.904838
Cre03.g163400	6.20542	11.4062	4.55069	10.3788	5.0313	10.9239		0.544039	0.43846	0.460577
Cre16.g687000	8.27105	19.4712	6.05398	13.8247	7.40238	21.4061		0.424784	0.43791	0.345807
Cre06.g294750	54.5385	102.154	45.9199	104.897	73.8283	94.345		0.533885	0.437762	0.782535
Cre12.g538000	38.1584	40.9837	19.7591	45.1429	39.4126	42.2095		0.931063	0.437701	0.933738
Cre01.g044050	75.8927	128.877	79.5083	181.815	105.934	122.794		0.588877	0.437303	0.862697
Cre17.g728100	8.34489	14.3351	5.324	12.1829	12.3713	17.1622		0.58213	0.437006	0.720846
Cre03.g189300	24.5439	48.9922	17.3571	39.7954	35.4254	45.8325		0.500976	0.436158	0.772932
Cre01.g020918	13.5689	32.8183	12.7004	29.1199	16.7378	39.1487		0.413455	0.436142	0.427544
Cre08.g363500	6.34619	11.4892	4.58428	10.5187	6.92535	9.52942		0.552361	0.435822	0.726734
Cre12.g550700	6.57864	11.6003	5.69983	13.0793	6.95019	11.6839		0.567109	0.43579	0.594852
Cre16.g671950	22.4812	47.2729	20.6664	47.4236	35.5245	48.124		0.475562	0.435783	0.738187
Cre02.g085300	20.8456	43.1213	23.7543	54.5146	27.1424	40.0439		0.483418	0.435742	0.677816
Cre07.g328200	22.4273	57.9407	26.1517	60.0214	35.3107	61.613		0.387073	0.435706	0.573105
Cre03.g164350	21.8302	41.4362	17.8743	41.0493	28.1261	42.8325		0.526839	0.435435	0.656653
Cre10.g461050	70.1336	132.043	50.2625	115.682	65.6963	137.725		0.531142	0.434489	0.477011
Cre12.g538450	5.23052	11.0326	4.92674	11.3394	6.83995	13.5501		0.474097	0.43448	0.50479
Cre12.g525700	14.9851	27.4579	11.2221	25.8374	14.8081	26.9859		0.545748	0.434335	0.548735
Cre06.g273550	38.2534	63.4234	27.6685	63.7221	47.9861	64.5016		0.603143	0.434206	0.743952
Cre12.g483650	11.4365	25.0913	9.63695	22.2017	13.6847	24.6985		0.455795	0.434064	0.55407
Cre10.g454550	5.02975	9.10596	5.18773	11.9539	8.32723	8.93852		0.552358	0.433978	0.931612
Cre09.g403050	25.3009	44.3644	18.5848	42.8272	27.3421	47.5138		0.570297	0.433949	0.575456
Cre17.g723400	13.9808	34.2835	11.0637	25.5158	19.0693	71.4826		0.4078	0.433602	0.266768
Cre16.g662300	10.9841	29.2241	14.156	32.6534	15.8419	30.7529		0.375858	0.433523	0.515135
Cre07.g320900	8.39156	13.0742	6.13074	14.1551	9.80306	12.9367		0.641841	0.433112	0.757771
Cre16.g661350	6.70096	22.7207	7.99835	18.4681	10.1649	24.5802		0.294928	0.43309	0.41354
Cre03.g208945	8.27616	12.851	4.8902	11.3132	9.99458	13.276		0.644009	0.432256	0.752831
Cre09.g416750	13.0019	27.2807	12.4622	28.8728	17.1936	34.2718		0.476597	0.431624	0.501684
Cre03.g174300	12.8075	21.8863	9.66077	22.4158	16.0687	19.3769		0.585183	0.43098	0.829271
Cre13.g607050	15.7221	20.9973	11.2065	26.0199	17.2575	22.4533		0.748768	0.43069	0.768595
Cre17.g723350	7.817	23.1045	7.02214	16.3074	10.4661	49.9131		0.338332	0.430611	0.209686
Cre01.g030850	14.163	29.0699	14.7597	34.2816	21.1088	37.3679		0.487205	0.430543	0.564891
Cre07.g339700	23.1252	81.0958	31.2901	72.6831	28.6389	77.1782		0.285159	0.4305	0.371075
Cre08.g377000	59.1253	112.591	70.1455	163.006	87.4402	124.896		0.525133	0.430325	0.700104
Cre11.g476800	4.29763	9.89952	4.5905	10.6715	4.21757	10.8545		0.434125	0.430164	0.388555
Cre14.g614000	8.63411	18.7217	7.14346	16.6276	10.9234	18.6303		0.461182	0.429615	0.586324
Cre03.g175400	55.4958	130.263	48.1584	112.315	55.55	112.176		0.426029	0.42878	0.495204
Cre12.g484200	46.5627	108.715	44.549	103.911	61.7383	97.1537		0.428301	0.428723	0.63547
Cre12.g498550	59.9762	125.954	53.4024	124.663	104.885	124.433		0.476175	0.428374	0.842903
Cre12.g487400	9.08138	18.8607	8.19082	19.1312	10.3458	19.613		0.481498	0.428139	0.527497
Cre08.g364450	21.6528	50.232	24.4326	57.0684	24.0704	52.878		0.431056	0.428128	0.455206
Cre12.g524300	24.1881	56.9315	23.2983	54.5145	29.7692	58.2521		0.424863	0.427378	0.511041
Cre16.g667250	8.56039	49.6981	12.1586	28.4844	11.444	49.6479		0.172248	0.426851	0.230503
Cre08.g358900	9.38959	15.1965	6.29028	14.7437	12.8093	15.9569		0.617878	0.426642	0.802744
Cre12.g541777	14.8278	29.5029	13.5603	31.7894	14.5953	29.7081		0.502588	0.426567	0.49129
Cre03.g181150	367.47	475.015	265.612	623.129	494.538	403.9		0.773597	0.426255	1.22441
Cre16.g684800	9.71815	15.2552	5.88818	13.8222	8.70665	11.2254		0.637039	0.425994	0.77562
Cre06.g275650	16.4333	31.0018	14.4388	33.9203	23.9936	39.2443		0.530076	0.425668	0.611391
Cre14.g620900	17.566	27.6654	12.8214	30.1268	19.7908	33.6439		0.634945	0.425581	0.588243
Cre13.g603900	11.5746	27.2907	12.2175	28.7215	13.6519	28.3312		0.424123	0.425378	0.481868
Cre10.g459650	9.13025	19.7929	6.31781	14.8847	6.02785	11.5562		0.461289	0.42445	0.521612
Cre03.g178150	268.685	420.845	211.075	497.421	322.513	382.847		0.638442	0.424339	0.842407
Cre07.g352650	9.8648	23.3874	11.0112	25.9654	9.86612	22.5913		0.4218	0.424072	0.436722
Cre12.g524200	8.06131	14.7285	7.55137	17.8181	12.1361	19.6052		0.547327	0.423803	0.619025
Cre02.g144750	69.8716	105.471	37.4982	88.5223	57.6221	97.4239		0.662472	0.423602	0.591458
Cre01.g003463	4.58303	9.69096	4.30957	10.1865	5.76843	10.0347		0.472918	0.423067	0.574848
Cre10.g461950	22.0645	39.6151	19.7277	46.6545	27.9241	48.6494		0.556972	0.422847	0.573987
Cre08.g385200	44.2009	92.0899	45.9333	108.736	54.5669	95.025		0.479976	0.42243	0.574237
Cre02.g101850	11.1991	28.9146	13.6043	32.2152	15.0828	26.9922		0.387316	0.422294	0.558784
Cre12.g537200	80.016	144.173	50.728	120.203	48.9084	119.307		0.555	0.422019	0.409937
Cre17.g726450	14.9985	41.2968	17.981	42.6236	22.5709	41.3759		0.363188	0.421855	0.545508
Cre17.g721300	338.928	572.253	262.539	622.417	443.605	524.398		0.59227	0.421806	0.845932
Cre03.g182450	22.9316	53.2375	24.1464	57.2522	26.0635	53.8662		0.430741	0.421755	0.483856
Cre03.g206450	170.851	326.644	203.56	482.939	259.838	279.904		0.52305	0.421503	0.928311
Cre01.g033350	5.06932	11.9679	5.45589	12.953	5.94856	15.3196		0.423576	0.421207	0.388297
Cre02.g088600	13.0831	19.8717	7.83596	18.6063	16.8251	25.0925		0.658378	0.421146	0.670523
Cre03.g181350	7.338	16.3188	6.37404	15.1418	8.30952	12.3872		0.449665	0.420957	0.670815
Cre09.g394701	10.9167	27.8568	11.8957	28.2655	13.4957	25.199		0.391886	0.420856	0.535565
Cre10.g437050	7.6863	14.6925	6.92727	16.4831	10.1829	15.1616		0.523144	0.420265	0.671624
Cre06.g278194	15.2474	25.0551	9.17271	21.8268	12.5474	24.0308		0.608555	0.42025	0.522138
Cre04.g213000	6.45868	19.7756	5.95856	14.1848	4.77411	17.5657		0.326598	0.420067	0.271786
Cre05.g234750	5.39853	14.8904	6.5644	15.6298	8.58404	14.3926		0.362551	0.419993	0.59642
Cre16.g670250	29.0954	58.3033	23.9989	57.1652	33.268	59.2615		0.499035	0.419817	0.561376
Cre14.g614250	7.19636	15.3159	6.84169	16.2971	9.59755	17.0043		0.469862	0.41981	0.564419
Cre09.g388750	15.4082	24.6373	9.03869	21.5545	15.7108	31.1441		0.625401	0.419341	0.504455
Cre13.g568000	14.8282	24.0321	9.10023	21.7023	15.8651	14.7949		0.617016	0.419321	1.07234
Cre03.g145547	12.1176	19.784	9.21556	21.9787	14.6397	21.2265		0.612495	0.419295	0.68969
Cre06.g310750	24.7071	38.137	15.3049	36.5088	25.5594	39.3899		0.647851	0.419211	0.648882
Cre02.g076800	7.14102	13.3811	5.81858	13.8809	8.52858	17.3548		0.533665	0.419179	0.491425
Cre06.g307900	20.7752	33.7482	14.4716	34.5249	25.2341	33.3028		0.615594	0.419164	0.757717
Cre16.g658650	6.88599	11.5902	4.57317	10.9139	7.95053	12.1505		0.594122	0.419023	0.654338
Cre07.g329700	20.3442	35.7649	16.5901	39.6206	30.4904	47.1948		0.568831	0.418724	0.646054
Cre16.g674250	14.6528	27.0152	13.1449	31.3991	15.7981	28.2744		0.542391	0.418639	0.558742
Cre06.g292249	3.86019	6.38242	7.3972	17.6752	5.20443	9.00491		0.604816	0.418507	0.577955
Cre01.g015000	13.119	36.0777	13.3912	31.999	20.3465	34.4325		0.363632	0.418488	0.59091
Cre17.g701300	6.76694	16.2741	6.20159	14.8302	6.36793	15.1949		0.41581	0.418173	0.419083
Cre06.g286400	7.3409	13.9934	6.62092	15.838	8.44351	13.6632		0.524597	0.41804	0.617975
Cre13.g588800	8.1723	14.4666	6.80759	16.2888	9.84726	15.914		0.564908	0.417931	0.61878
Cre03.g189400	21.8435	49.7008	21.8663	52.3669	26.7469	53.4519		0.4395	0.41756	0.500392
Cre14.g614800	4.24844	9.07221	4.35673	10.437	7.74747	10.2565		0.468292	0.417431	0.755372
Cre17.g738050	59.9076	101.981	49.8804	119.627	83.5278	118.02		0.587439	0.416966	0.707743
Cre17.g705850	7.79733	12.9879	5.77745	13.8597	8.43165	13.8996		0.600353	0.416852	0.606611
Cre06.g250902	10.9105	25.5599	10.17	24.4398	8.91625	26.147		0.42686	0.416125	0.341005
Cre02.g141550	21.2846	31.5361	11.2561	27.0505	26.2167	36.6304		0.674928	0.416114	0.715709
Cre06.g267500	38.0691	79.4782	37.5888	90.5924	53.8791	96.3269		0.478988	0.414922	0.559336
Cre09.g389550	5.91529	12.2689	5.59156	13.4921	9.91695	17.9002		0.482137	0.414432	0.554013
Cre16.g695850	9.81786	14.8597	5.72296	13.8177	8.19441	14.0205		0.660704	0.414176	0.584459
Cre06.g261000	3797.33	7525.96	3159.19	7627.86	5182.39	5690.52		0.504564	0.414165	0.910706
Cre03.g150700	7.07099	9.91186	3.93777	9.5108	8.75517	10.6144		0.713387	0.414031	0.824839
Cre03.g199950	7.49125	12.8335	6.26792	15.148	9.285	13.8861		0.583726	0.413779	0.668654
Cre12.g487200	25.4542	46.4826	21.0435	50.9483	21.1694	52.5647		0.547607	0.413036	0.40273
Cre02.g080650	94.1702	133.816	55.3572	134.103	67.7189	109.169		0.703729	0.412796	0.620313
Cre17.g731250	7.01496	14.5623	5.92211	14.3475	8.45905	14.0623		0.481721	0.412763	0.601541
Cre02.g084050	4.16793	8.61267	4.45653	10.7976	5.73835	9.68335		0.48393	0.412733	0.5926
Cre06.g278097	8.77846	19.9099	8.80814	21.3427	10.3572	21.9883		0.440909	0.4127	0.471032
Cre13.g603700	109.464	162.964	67.7847	164.269	124.224	215.952		0.671707	0.412645	0.575239
Cre16.g692751	120.208	168.651	80.963	196.315	190.127	219.476		0.712762	0.412414	0.866277
Cre10.g458550	134.233	262.918	116.815	283.372	183.842	249.53		0.510551	0.412232	0.736753
Cre01.g037650	5.67087	10.2068	4.26827	10.3615	5.7922	10.2842		0.555597	0.411936	0.563213
Cre17.g710700	6.99638	12.4378	4.94741	12.0187	6.05236	9.6022		0.562509	0.411643	0.63031
Cre01.g028713	12.257	24.0611	8.96684	21.8018	13.9499	21.7178		0.509411	0.411289	0.642326
Cre16.g677000	39.0162	62.6097	29.4682	71.6559	42.6786	73.6877		0.623165	0.411246	0.579182
Cre12.g561550	4.99496	10.7869	4.34046	10.5593	5.26475	11.3308		0.463058	0.411056	0.464641
Cre10.g455300	30.96	69.6681	34.7719	84.6326	36.2232	76.8409		0.444393	0.410857	0.471405
Cre03.g183050	13.6205	34.5596	14.7657	35.9786	19.0146	37.2812		0.394116	0.410402	0.510032
Cre03.g170450	11.3183	25.651	12.3604	30.1575	14.9323	27.8449		0.441242	0.409862	0.536267
Cre12.g551100	10.8179	26.6144	11.4834	28.0562	10.4827	37.5574		0.406468	0.4093	0.279111
Cre07.g354200	7.69138	15.1266	6.0722	14.8379	11.8115	16.2566		0.508467	0.409236	0.726566
Cre16.g670973	19.6511	34.8701	16.0248	39.1592	27.3045	33.472		0.563552	0.409222	0.815742
Cre07.g328150	19.2235	25.6547	13.4834	33.0077	24.1621	30.1403		0.749317	0.408493	0.801654
Cre05.g243050	21.776	53.0681	24.2963	59.5178	40.9898	45.5306		0.410341	0.408219	0.900269
Cre06.g304300	25.6924	46.4437	21.0282	51.5171	38.9325	65.4798		0.553195	0.408179	0.594573
Cre01.g027900	5.71002	10.4281	4.44806	10.9075	14.966	11.6019		0.547561	0.407798	1.28996
Cre07.g334025	9.26217	17.8296	8.10888	19.8857	13.4029	17.4018		0.519483	0.407774	0.770202
Cre12.g518650	14.7654	28.8248	10.1025	24.7855	13.3814	26.6692		0.512246	0.407597	0.501755
Cre02.g101400	18.2654	32.0855	10.9158	26.7953	15.223	32.2868		0.569273	0.407377	0.471493
Cre07.g326600	5.64585	10.055	4.48937	11.0244	7.31521	10.273		0.561497	0.407221	0.712081
Cre03.g144827	9.10498	17.3197	9.97084	24.4993	7.9429	13.3439		0.525701	0.406985	0.595246
Cre06.g273050	6.21499	10.8498	4.61146	11.3336	8.32248	11.5027		0.572821	0.406884	0.723524
Cre16.g665400	50.5048	100.851	47.5237	117.018	64.2516	94.0617		0.500786	0.406123	0.683079
Cre09.g390949	31.1854	43.2728	18.6413	45.9363	32.0566	42.2942		0.72067	0.405808	0.757943
Cre14.g619950	6.01489	11.458	5.22351	12.8874	6.83262	12.6255		0.524951	0.405319	0.541176
Cre01.g020350	118.855	173.984	70.9491	175.048	111.48	146.487		0.683138	0.405312	0.761023
Cre13.g572200	8.13656	11.4606	4.36265	10.7698	6.47122	13.4347		0.709959	0.405082	0.48168
Cre03.g192350	47.0391	112.879	43.8554	108.345	31.2478	97.4706		0.416721	0.404775	0.320587
Cre03.g144504	138.529	238.708	93.2545	230.506	170.994	197.383		0.580328	0.404564	0.866306
Cre16.g694850	10.9799	28.4359	10.5466	26.0694	14.1013	31.0197		0.386128	0.404559	0.454592
Cre16.g695500	8.14962	9.9912	4.69236	11.5998	9.18804	12.1447		0.81568	0.404521	0.756547
Cre07.g333900	61.6985	122.938	65.6507	162.417	93.5384	117.687		0.501867	0.404211	0.794807
Cre11.g479250	8.52789	13.7276	5.38992	13.3355	8.31991	13.5813		0.621222	0.404178	0.6126
Cre12.g530500	4.49348	8.78367	4.03694	9.99145	5.56209	8.91353		0.511572	0.404039	0.624005
Cre10.g456150	6.37553	11.6662	3.99018	9.88203	8.27537	12.4997		0.546496	0.403781	0.662045
Cre03.g145727	22.6254	46.835	23.239	57.6392	27.8931	55.9447		0.483087	0.40318	0.498583
Cre16.g678000	19.5116	41.5274	14.7668	36.7364	21.4958	37.5369		0.469849	0.401966	0.572658
Cre07.g349119	8.88872	17.363	5.3358	13.2746	10.2239	15.9071		0.511935	0.401956	0.642726
Cre13.g591400	8.41853	27.6155	8.72036	21.7119	4.68362	23.1845		0.304848	0.40164	0.202015
Cre07.g331750	19.9354	39.5129	17.165	42.7389	26.0378	42.019		0.504529	0.401625	0.619667
Cre14.g632767	5.73458	14.0247	6.82367	17.0206	7.49026	16.2698		0.408891	0.400907	0.460378
Cre03.g182150	66.4927	140.441	59.6514	149.092	94.1482	142.021		0.473456	0.400098	0.662917
Cre09.g399178	10.2688	19.2278	8.65002	21.6237	13.3938	24.9174		0.53406	0.400025	0.537528
Cre12.g549350	25.6969	50.5215	20.3279	50.8969	38.7762	54.1449		0.508633	0.399394	0.716156
Cre08.g358579	7.27666	16.1706	8.26865	20.7052	10.4397	20.083		0.449993	0.399351	0.519828
Cre16.g679950	4.76465	10.0803	4.0041	10.0294	7.5717	12.3895		0.472669	0.399236	0.611138
Cre17.g698400	19.9345	92.762	29.6213	74.2293	23.5572	129.528		0.214899	0.399051	0.18187
Cre12.g513200	278.153	435.897	183.227	459.605	275.867	403.115		0.638116	0.398662	0.684338
Cre02.g079400	35.7273	76.9116	30.5611	76.7305	49.8441	80.0529		0.464524	0.398291	0.62264
Cre17.g721800	8.3055	14.9659	6.44934	16.2024	8.14631	13.645		0.554962	0.398048	0.597018
Cre09.g396700	8.32869	13.8301	6.01888	15.1412	12.1053	16.7679		0.602215	0.397517	0.721933
Cre03.g213425	10.4279	26.0125	9.77498	24.6139	12.8059	22.814		0.40088	0.397133	0.561318
Cre12.g509050	51.6843	117.668	47.1921	118.84	84.348	119.764		0.439238	0.397106	0.704285
Cre06.g283400	10.0578	21.067	7.18104	18.0995	10.1948	21.9414		0.47742	0.396754	0.464638
Cre13.g576760	11.0888	32.5912	14.8684	37.4811	16.5589	28.621		0.340239	0.396691	0.578558
Cre14.g609850	5.93585	10.1243	3.91741	9.87645	5.33554	7.68879		0.586297	0.396642	0.693938
Cre03.g144667	18.7815	51.1392	23.4123	59.0551	29.1543	53.5041		0.367262	0.396448	0.544898
Cre03.g158000	76.8068	159.974	58.6389	148.152	128.533	141.578		0.480121	0.395802	0.90786
Cre16.g650050	7.79107	17.5631	6.74451	17.0592	11.7458	17.0891		0.443604	0.395359	0.687327
Cre10.g426000	8.47903	20.6001	9.74433	24.6523	15.7371	17.0661		0.411601	0.395271	0.922126
Cre17.g707900	38.5923	59.0023	25.4108	64.2985	36.5969	60.3958		0.654081	0.395201	0.605951
Cre01.g023150	8.05525	13.1975	5.43705	13.797	11.3564	17.1824		0.610362	0.394075	0.660932
Cre11.g478700	115.122	147.305	82.4343	209.25	183.254	191.713		0.781521	0.393951	0.955877
Cre12.g547400	15.5712	25.1661	10.5179	26.712	19.2444	22.6365		0.618737	0.393752	0.850149
Cre02.g081450	6.74751	12.0762	4.60782	11.715	7.40347	11.1013		0.558744	0.393327	0.666901
Cre05.g234661	11.2111	25.2891	10.9547	27.862	18.4023	64.4845		0.443317	0.393177	0.285376
Cre02.g108400	53.8843	83.0158	38.565	98.1078	70.5483	91.7719		0.649085	0.393088	0.768735
Cre01.g042750	496.228	695.715	229.951	585.134	281.944	509.831		0.713263	0.392989	0.553015
Cre15.g643702	24.8297	50.5819	17.8508	45.4465	16.9371	32.2942		0.490881	0.392787	0.524463
Cre03.g155650	36.9806	65.0757	28.835	73.4154	43.6306	85.2328		0.56827	0.392765	0.511899
Cre06.g303700	13.832	41.3551	17.9241	45.641	29.3951	42.8286		0.334469	0.392719	0.686343
Cre12.g544050	30.5224	74.9957	32.546	82.9277	36.4033	72.6141		0.406989	0.392462	0.501326
Cre17.g698000	383.959	623.387	211.807	539.994	335.02	596.675		0.615924	0.39224	0.561478
Cre03.g171950	7.88886	25.6779	8.38198	21.3723	10.251	29.2089		0.307224	0.392189	0.350955
Cre16.g688850	18.0375	22.1193	8.792	22.429	19.2725	22.6768		0.815464	0.391993	0.849877
Cre03.g199300	6.24827	12.341	6.68119	17.0488	9.17167	13.883		0.506302	0.391886	0.66064
Cre01.g047550	19.0456	28.0607	11.1794	28.539	19.2841	32.4278		0.678729	0.391724	0.594678
Cre03.g151750	27.4107	63.397	27.6162	70.575	35.972	59.9779		0.432366	0.391303	0.599754
Cre03.g197500	32.8281	46.5188	18.2154	46.5713	36.0027	50.8681		0.705695	0.391129	0.707766
Cre12.g492600	12.2439	29.33	9.52642	24.3638	9.90551	38.7139		0.417453	0.391007	0.255864
Cre09.g409150	247.411	439.525	256.964	657.25	384.596	406.928		0.562905	0.390968	0.945121
Cre11.g475850	30.0375	75.327	29.5631	75.6409	49.7024	85.3882		0.398761	0.390835	0.582076
Cre03.g145687	10.1774	14.2336	6.18857	15.8351	13.34	17.042		0.715026	0.390813	0.782772
Cre01.g003850	10.714	22.2634	6.63808	16.9985	14.6041	15.7696		0.481238	0.39051	0.926092
Cre01.g037050	11.6472	24.5258	7.79133	19.9722	13.6286	31.7697		0.474896	0.390109	0.428981
Cre05.g236150	7.45245	13.6298	5.78335	14.8263	10.6103	15.6185		0.546776	0.390074	0.679342
Cre09.g387500	11.7719	22.8867	9.37073	24.0274	9.71632	24.3799		0.514355	0.390002	0.398538
Cre01.g001100	16.2213	21.9162	9.21109	23.627	16.9532	23.2654		0.740151	0.389854	0.728687
Cre12.g543303	8.00453	17.0263	7.13297	18.3009	8.64048	18.8426		0.470127	0.389761	0.458561
Cre03.g205473	36.6998	41.817	12.6095	32.3653	19.2696	25.7499		0.877629	0.389599	0.748337
Cre14.g626250	9.4748	20.102	7.91734	20.3416	15.0665	22.3322		0.471336	0.389219	0.674654
Cre17.g739550	12.458	31.9152	12.0609	30.9952	16.711	35.0949		0.390347	0.389122	0.476166
Cre11.g479050	39.816	70.6495	28.2272	72.6452	65.1905	78.8419		0.563571	0.388562	0.826851
Cre10.g456050	41.2427	61.8043	28.0606	72.2976	70.3031	58.6738		0.667311	0.388126	1.1982
Cre07.g352550	21.6708	65.9616	23.0734	59.4541	39.2326	95.9931		0.328537	0.388088	0.408702
Cre06.g250800	13.2486	36.5486	13.7665	35.5168	16.2047	36.017		0.362493	0.387605	0.449918
Cre03.g189500	27.4534	52.9301	20.4706	52.9314	41.6482	65.6521		0.518673	0.386738	0.634377
Cre09.g407100	9.48271	19.9693	8.2289	21.2787	9.58583	16.643		0.474864	0.38672	0.575968
Cre02.g118500	24.2868	36.6814	14.4923	37.5033	21.9487	35.0824		0.662101	0.386427	0.625633
Cre09.g396400	23.7221	51.483	23.7469	61.4764	30.2715	59.6852		0.460775	0.386277	0.507186
Cre14.g626500	5.18241	11.9171	4.99458	12.9362	6.12678	12.3711		0.434872	0.386093	0.495249
Cre09.g409850	35.3996	57.1947	29.0735	75.372	62.8246	59.8835		0.618931	0.385733	1.04911
Cre03.g196550	35.6141	66.9473	27.4555	71.2541	56.5516	66.7029		0.531972	0.385318	0.847813
Cre03.g194850	273.25	422.57	143.127	371.457	228.521	370.987		0.646638	0.385312	0.615981
Cre10.g446550	36.8092	100.505	45.677	118.665	56.0858	89.7744		0.366242	0.384924	0.624742
Cre06.g278239	47.6107	88.2045	31.6146	82.1397	58.3352	83.168		0.539776	0.384888	0.701414
Cre06.g260100	22.6245	28.2573	11.635	30.2475	36.2083	43.6469		0.80066	0.38466	0.829573
Cre06.g279000	15.5713	35.4519	15.6084	40.5772	22.6812	40.7143		0.439223	0.384659	0.557082
Cre01.g038600	83.8238	239.545	75.4492	196.482	88.1747	221.958		0.349929	0.384001	0.397258
Cre10.g439100	20.0662	46.0906	17.1091	44.5593	23.6505	53.7919		0.435364	0.383962	0.439667
Cre08.g372450	617.532	1178.89	514.697	1340.73	888.48	1138.09		0.523825	0.383893	0.780676
Cre09.g401886	45.8062	86.3584	31.7255	82.6616	60.7814	96.2668		0.53042	0.3838	0.631385
Cre03.g196900	12.7247	27.9505	10.883	28.3564	18.4156	28.4062		0.455258	0.383793	0.648295
Cre09.g389089	8.30916	12.2092	4.54729	11.8657	11.7232	14.9886		0.680565	0.38323	0.782141
Cre16.g663900	70.4073	151.649	53.8273	140.553	119.978	135.242		0.464278	0.382968	0.887136
Cre16.g675637	80.3933	176.07	76.3736	199.58	116.834	190.566		0.456599	0.382672	0.613089
Cre10.g420700	262.54	424.984	184.046	481.56	326.244	324.432		0.617764	0.382187	1.00559
Cre17.g726300	6.03942	16.6191	6.71364	17.5689	7.69134	14.4245		0.363402	0.382132	0.533214
Cre16.g691550	14.1868	17.4874	8.10702	21.2216	20.9183	22.8834		0.811258	0.382017	0.914126
Cre03.g169850	6.14081	15.4224	6.57194	17.2186	6.69228	13.8065		0.398175	0.381677	0.48472
Cre12.g557600	210.728	219.585	76.7486	201.159	116.69	172.045		0.959665	0.381532	0.678253
Cre16.g688200	4.94901	11.8106	5.55065	14.5493	10.0083	16.2276		0.419031	0.381506	0.616746
Cre16.g650800	72.6635	120.763	46.3482	121.511	74.2628	114.671		0.601703	0.381432	0.647616
Cre06.g311850	10.4187	17.6948	6.68203	17.5279	14.3211	18.8331		0.5888	0.381223	0.760422
Cre09.g408200	54.8464	115.145	41.0143	107.67	59.4566	104.58		0.476325	0.380926	0.568527
Cre07.g334800	20.5866	91.6849	34.4794	90.6309	42.5743	91.0419		0.224536	0.380438	0.467634
Cre13.g581450	13.1636	29.6059	12.4971	32.8593	17.7436	36.7371		0.444628	0.380322	0.482989
Cre03.g151700	10.0674	18.1429	8.24529	21.7064	16.0856	22.2179		0.554895	0.379855	0.723993
Cre11.g467771	6.94287	15.0868	7.27213	19.151	8.02884	14.7709		0.460195	0.379726	0.543558
Cre06.g283350	8.43715	23.4725	9.07668	23.9318	9.39676	25.2217		0.359448	0.379273	0.372566
Cre03.g145427	9.18811	17.8793	6.67006	17.6053	10.378	17.5615		0.513897	0.378867	0.590952
Cre01.g050550	249.689	423.281	165.805	437.821	406.963	381.47		0.589889	0.378705	1.06683
Cre13.g565850	18.7924	33.3055	12.321	32.5879	17.5231	31.6978		0.564243	0.378085	0.552818
Cre06.g302700	14.3223	29.0484	11.1636	29.5546	17.1628	27.3068		0.49305	0.377728	0.628517
Cre16.g661150	9.93246	14.843	5.97432	15.8276	15.7151	16.1162		0.669168	0.377462	0.975112
Cre06.g250200	455.813	715.688	286.39	759.257	482.113	721.603		0.636888	0.377198	0.668114
Cre08.g366400	13.6905	28.0764	13.4584	35.6898	19.8264	35.7851		0.487616	0.377094	0.554041
Cre06.g267300	5.54755	13.3234	4.78395	12.698	6.22882	13.8794		0.416376	0.376748	0.448782
Cre07.g356400	105.082	166.36	64.1273	170.412	125.551	145.761		0.631654	0.376307	0.861348
Cre16.g671750	13.9614	31.0143	16.3362	43.4171	19.0722	32.2827		0.45016	0.376262	0.590787
Cre14.g632775	7.04125	17.7002	7.31302	19.4565	9.84044	22.6285		0.397806	0.375865	0.434869
Cre01.g002900	12.7517	13.8556	7.51929	20.0826	17.0603	14.0663		0.920328	0.374418	1.21285
Cre15.g639150	11.0918	19.7551	7.53807	20.1439	10.9777	19.2953		0.561465	0.374211	0.568931
Cre11.g478800	27.1464	43.1534	18.2976	48.917	26.964	44.0797		0.629067	0.374054	0.61171
Cre12.g546300	8.37067	12.1572	4.78523	12.806	8.6759	12.032		0.688536	0.373671	0.721069
Cre13.g579850	13.151	22.3917	9.05009	24.2227	11.6055	22.5246		0.587316	0.37362	0.515237
Cre02.g084300	12.0903	24.2699	8.70211	23.3305	17.9933	24.5905		0.49816	0.372993	0.731718
Cre12.g546000	8.14952	20.8447	8.9895	24.1045	10.7329	21.8553		0.390964	0.372939	0.491089
Cre16.g647500	4.31726	8.41592	3.94264	10.5757	5.82928	10.8184		0.512987	0.372802	0.53883
Cre16.g656400	58.8995	113.393	37.3247	100.138	75.8726	119.31		0.519428	0.372733	0.635928
Cre09.g404201	7.63245	12.8716	9.65798	25.9253	20.5572	63.6599		0.592968	0.372531	0.322922
Cre12.g558600	8.37469	12.607	4.65534	12.4992	13.1459	15.5222		0.664289	0.372451	0.84691
Cre05.g237400	24.8744	56.4459	23.4892	63.0742	26.8663	45.9071		0.440677	0.372406	0.585232
Cre01.g015650	4.00638	12.645	4.87563	13.0935	4.36332	13.3476		0.316835	0.37237	0.326899
Cre02.g100000	8.75601	17.838	6.62719	17.8332	12.8117	20.7553		0.490863	0.371621	0.617274
Cre02.g076350	69.9092	161.811	60.7156	163.522	83.6704	160.816		0.432042	0.371299	0.520287
Cre06.g278225	4.25898	10.9102	4.82462	12.9996	4.72809	9.721		0.390367	0.371136	0.486379
Cre06.g304500	42.8808	58.6323	25.2141	68.1433	59.0104	68.5179		0.731351	0.370016	0.861241
Cre14.g615050	15.6722	28.5994	13.2808	35.9328	26.0686	42.0336		0.547991	0.369601	0.620185
Cre12.g495650	12.7634	34.5703	13.845	37.466	15.5149	35.5987		0.369201	0.369535	0.435828
Cre03.g177350	19.4101	56.5243	18.2928	49.5325	18.1142	64.6752		0.343394	0.369309	0.28008
Cre02.g142850	5.53022	12.8372	4.92818	13.3467	7.38937	14.894		0.430796	0.369243	0.496131
Cre03.g182900	11.3371	27.3732	11.2451	30.5231	15.843	29.6633		0.414168	0.368413	0.534094
Cre03.g207000	13.6011	29.5284	10.74	29.1558	19.3726	26.2083		0.460611	0.368366	0.739178
Cre07.g328400	10.9509	20.3352	9.17081	24.9068	11.0559	20.7437		0.538519	0.368205	0.532976
Cre07.g345850	3.4091	8.72334	3.69211	10.0376	4.85162	8.03224		0.390802	0.367828	0.604018
Cre10.g436050	190.573	475.224	173.274	471.908	304.719	517.051		0.401017	0.367178	0.58934
Cre06.g262900	28.1885	57.5264	18.4195	50.1666	34.8605	55.4903		0.49001	0.367167	0.628227
Cre12.g510800	35.5178	100.09	35.9401	98.2735	57.558	94.9032		0.354859	0.365715	0.606492
Cre04.g218350	9.07357	14.3633	4.87852	13.3465	12.9932	17.2769		0.631719	0.365528	0.752056
Cre10.g433600	32.0408	89.3262	37.3961	102.384	30.4122	119.793		0.358694	0.365253	0.253873
Cre07.g332450	12.2681	28.5752	10.6295	29.1095	19.8071	30.7448		0.429327	0.365156	0.644242
Cre16.g692650	7.72207	9.62772	3.89076	10.6588	12.0597	12.3432		0.802066	0.365028	0.977032
Cre01.g034050	8.9062	17.452	6.83911	18.7518	11.1867	18.3833		0.510325	0.364718	0.608525
Cre16.g673550	5.17922	16.0767	6.45204	17.6926	7.89565	15.2034		0.322157	0.364674	0.519334
Cre12.g501800	17.2329	40.4171	15.4416	42.4167	24.4483	42.6804		0.426376	0.364045	0.572823
Cre12.g531100	21.491	46.1927	17.7462	48.7692	35.4322	55.8207		0.465247	0.363881	0.63475
Cre06.g252850	3.99276	11.3316	4.25212	11.6869	6.13093	14.1339		0.352356	0.363836	0.433775
Cre13.g592450	35.0841	62.0132	25.0305	68.8062	40.677	63.216		0.565752	0.363783	0.643461
Cre14.g627850	16.0847	39.3347	16.1571	44.4212	18.4484	40.2546		0.408919	0.363725	0.458293
Cre18.g749847	51.0947	101.782	33.2594	91.7364	45.1391	104.57		0.502001	0.362554	0.431664
Cre09.g414050	17.7222	30.3079	11.2487	31.0395	25.3554	30.1051		0.584739	0.3624	0.842229
Cre17.g712000	11.9987	27.5806	11.939	32.9568	13.4419	26.2682		0.435041	0.362262	0.511718
Cre10.g449550	83.5316	132.848	48.5651	134.571	129.019	164.071		0.628776	0.360888	0.786361
Cre06.g260250	5.13493	15.5491	5.2094	14.4877	6.25601	16.5631		0.33024	0.359574	0.377708
Cre06.g280850	22.9828	48.9195	19.8035	55.1505	33.2953	57.8472		0.469809	0.359081	0.575573
Cre04.g216850	323.973	463.128	159.849	445.212	361.23	478.401		0.699532	0.35904	0.755078
Cre17.g715500	23.193	62.7761	20.627	57.4906	43.9821	64.3315		0.369456	0.358789	0.683679
Cre04.g213100	6.404	16.2807	6.77697	18.8949	11.006	16.9378		0.393349	0.358667	0.649789
Cre12.g558150	13.191	30.3057	12.0713	33.6704	13.2314	27.2154		0.435265	0.358514	0.486173
Cre12.g543450	24.6644	54.5378	21.4501	59.8432	33.3212	68.0339		0.452244	0.358438	0.489773
Cre09.g391282	6.63559	15.0045	5.41419	15.1115	9.47088	17.4276		0.44224	0.358283	0.543441
Cre09.g389763	7.22841	12.198	4.63461	12.9401	9.08814	13.884		0.59259	0.358159	0.654576
Cre17.g728750	7.61629	6.24238	3.43021	9.58065	9.55167	7.56385		1.22009	0.358035	1.26281
Cre09.g392579	3.85835	12.04	3.55852	9.94374	4.16707	9.54202		0.320461	0.357865	0.436707
Cre02.g087450	6.70763	17.4675	6.09497	17.0387	7.92911	16.5341		0.384006	0.357713	0.479561
Cre16.g685000	5.22222	33.1393	6.67926	18.7473	5.67396	30.5413		0.157584	0.356279	0.18578
Cre14.g610950	25.9054	59.8712	26.9032	75.6629	40.9893	70.2463		0.432685	0.355567	0.583508
Cre03.g194250	5.40634	9.77229	4.42627	12.4495	8.65121	12.5971		0.553232	0.355538	0.686762
Cre17.g734500	146.491	287.391	121.819	342.838	181.64	330.868		0.509727	0.355325	0.54898
Cre03.g144647	22.9731	45.3084	20.1605	56.7463	27.1403	47.9796		0.507038	0.355274	0.565663
Cre12.g556600	8.15318	18.7031	6.38806	17.9925	9.00593	17.5566		0.435927	0.35504	0.512965
Cre02.g145800	48.2626	92.7989	28.8453	81.3144	52.3974	105.645		0.520077	0.354738	0.495976
Cre16.g657300	9.96366	27.5541	9.73567	27.4508	16.2224	31.4929		0.361604	0.354659	0.515113
Cre09.g396213	1198.46	2431.12	831.007	2351.67	1599.12	2343.74		0.492966	0.353369	0.682294
Cre12.g533800	8.67118	20.3028	7.69946	21.7937	9.50976	18.9836		0.427093	0.353288	0.500946
Cre03.g199535	121.098	281.005	119.283	337.745	200.547	250.194		0.430946	0.353175	0.801566
Cre12.g553550	4.69001	9.5286	4.04834	11.4649	5.06095	9.88429		0.492203	0.353107	0.51202
Cre11.g467707	100.086	209.162	70.807	200.587	112.261	196.584		0.478509	0.352999	0.571059
Cre10.g422300	11.7879	31.0351	10.086	28.6306	22.6689	28.3518		0.379825	0.35228	0.799558
Cre09.g412100	1110.54	2121.66	679.766	1932.27	1579.98	2233.91		0.52343	0.351797	0.707271
Cre17.g705400	30.0237	65.0851	25.0905	71.3824	46.8495	84.6201		0.461299	0.351494	0.553645
Cre03.g189800	52.0799	99.5933	36.0813	102.677	66.4711	99.6419		0.522926	0.351406	0.6671
Cre09.g412300	13.2295	28.9294	10.5884	30.2062	12.6371	28.1446		0.457303	0.350537	0.449006
Cre03.g158800	9.10261	21.4282	7.77277	22.2386	11.273	22.321		0.424796	0.349517	0.50504
Cre13.g588100	20.7798	66.8986	21.7538	62.2547	31.6306	62.7275		0.310616	0.349432	0.504254
Cre10.g457600	6.12083	12.693	5.16245	14.7764	6.25684	12.8529		0.482221	0.349371	0.486804
Cre17.g732250	20.9173	70.3246	23.7439	67.9653	37.9785	66.4478		0.297439	0.349353	0.571554
Cre09.g403900	20.3656	32.0485	15.8092	45.2597	21.2528	36.6389		0.635462	0.3493	0.580061
Cre11.g467770	192.828	399.299	147.419	422.549	263.61	370.094		0.482916	0.34888	0.712279
Cre06.g309100	25.2488	62.2828	20.5946	59.0682	35.0512	63.5384		0.40539	0.348658	0.551654
Cre17.g737300	11.054	14.2754	5.72429	16.4866	19.9957	27.5373		0.774339	0.347209	0.726131
Cre10.g462250	36.8021	62.7025	24.5134	70.6064	33.8924	56.1659		0.586932	0.347184	0.603434
Cre07.g343700	96.6443	173.24	51.5162	148.429	68.0209	134.709		0.557864	0.347076	0.504947
Cre02.g084350	10.7431	35.3464	10.9519	31.5972	11.411	33.2607		0.303938	0.34661	0.343078
Cre12.g497300	132.621	173.193	56.8728	164.125	150.057	171.103		0.765741	0.346521	0.876998
Cre12.g499800	104.99	222.218	96.4299	279.276	150.23	198.843		0.472464	0.345285	0.755521
Cre15.g636300	5.90399	11.9178	4.57272	13.2491	7.80928	13.0085		0.495393	0.345134	0.600321
Cre09.g416050	59.4854	136.199	44.7082	129.691	82.0404	126.687		0.436754	0.344729	0.647583
Cre12.g493350	8.97726	13.1231	6.26717	18.1916	14.7303	13.7177		0.684081	0.344509	1.07382
Cre10.g465550	19.3334	37.0558	9.89963	28.7428	17.0734	36.9186		0.521737	0.344421	0.462461
Cre12.g521450	4.1273	9.85259	4.89451	14.226	8.07463	12.1143		0.418905	0.344054	0.666537
Cre03.g173550	16.2327	32.5762	10.6312	30.9231	11.8032	33.8759		0.498299	0.343795	0.348425
Cre07.g326200	7.85854	17.5693	7.42185	21.6026	9.89292	15.0522		0.447288	0.343563	0.657241
Cre10.g440400	345.874	638.805	240.546	701.318	519.17	573.473		0.541439	0.342991	0.905309
Cre07.g337650	43.6393	98.0759	36.0499	105.177	40.9036	96.7019		0.444954	0.342755	0.422987
Cre06.g261500	20.6132	37.4157	13.2654	38.7068	31.0568	47.7237		0.550924	0.342715	0.650763
Cre02.g077750	235.952	352.577	132.701	387.581	185.585	372.78		0.669221	0.342383	0.497841
Cre03.g168850	8.47094	21.6795	8.30823	24.2781	12.5803	22.0918		0.390735	0.342211	0.569456
Cre08.g360950	8.92734	39.4096	10.2475	30.0177	7.34817	37.3253		0.226527	0.341382	0.196868
Cre12.g537641	11.9145	27.539	9.3096	27.2709	16.4488	24.6317		0.432641	0.341375	0.66779
Cre06.g285401	72.4768	161.375	60.7969	178.302	107.426	150.873		0.44912	0.340977	0.712029
Cre16.g685400	10.3998	21.428	7.81825	22.9472	18.8831	24.3883		0.485337	0.340706	0.774269
Cre05.g232850	16.5836	41.7947	14.0587	41.279	23.2387	43.9951		0.396787	0.340578	0.528211
Cre03.g204800	5.65773	13.0019	4.9659	14.5882	7.974	14.2957		0.435146	0.340405	0.55779
Cre09.g390245	8.06395	19.7774	6.50033	19.1083	9.24187	18.851		0.407736	0.340184	0.490259
Cre12.g530900	86.5195	134.453	40.5009	119.147	58.5351	139.238		0.643493	0.339924	0.420396
Cre12.g502050	5.24974	10.0927	3.88733	11.4374	6.89285	11.8318		0.520152	0.339879	0.58257
Cre06.g278104	11.5957	28.3109	10.0726	29.6685	16.305	28.6697		0.409584	0.339505	0.568719
Cre13.g566050	26.0218	72.1331	29.5552	87.0939	38.024	67.4144		0.360747	0.339349	0.564034
Cre06.g269050	25.8532	59.4392	19.6157	57.804	32.8458	58.8372		0.434952	0.339348	0.558249
Cre02.g116750	329.886	588.168	175.736	517.983	303.201	578.11		0.56087	0.33927	0.524469
Cre03.g177200	16.6693	44.8859	17.7277	52.2752	16.1211	44.5457		0.371371	0.339123	0.3619
Cre02.g145950	11.7702	14.1469	5.9047	17.4122	29.4598	23.0209		0.831999	0.339113	1.2797
Cre12.g559950	10.4096	33.2751	10.9382	32.288	11.7951	27.4614		0.312835	0.33877	0.429516
Cre06.g269650	38.6195	82.6518	26.1146	77.104	45.6559	82.6092		0.467255	0.338693	0.552673
Cre06.g284900	161.105	193.439	82.8492	244.974	194.197	235.759		0.832847	0.338196	0.82371
Cre12.g503950	5.4277	12.4037	3.93525	11.6508	6.06406	10.1558		0.437587	0.337767	0.597103
Cre04.g229700	18.8273	31.0196	9.42437	27.9202	26.4051	46.3382		0.606949	0.337547	0.569834
Cre17.g742550	4.18142	9.6418	3.46706	10.2718	5.49843	8.24303		0.433676	0.337532	0.66704
Cre11.g468400	7.87362	16.0392	4.3001	12.7405	8.15673	13.8566		0.490899	0.337514	0.588653
Cre07.g320150	11.3622	20.098	7.38696	21.9248	15.0001	22.6788		0.56534	0.336923	0.661415
Cre14.g621751	6.24589	17.1503	5.83654	17.3288	6.55166	17.0544		0.364185	0.336812	0.384162
Cre13.g571100	4.55811	10.8038	4.2345	12.5758	6.05337	9.87988		0.421899	0.336718	0.612697
Cre01.g051500	621.207	1477.09	495.509	1472.23	1077.67	1320.79		0.420561	0.33657	0.815928
Cre14.g629000	7.537	10.85	4.08919	12.1597	8.74587	13.3776		0.694654	0.33629	0.65377
Cre11.g481126	38.9279	72.0856	24.4563	72.8063	56.7978	75.6868		0.540023	0.335909	0.750432
Cre10.g418100	16.2824	34.6295	13.3911	39.8882	25.4537	44.261		0.470189	0.335716	0.575082
Cre11.g468450	86.016	123.606	46.7106	139.212	126.402	136.384		0.695889	0.335536	0.92681
Cre02.g074100	33.6705	86.5693	36.9495	110.208	52.4415	83.1071		0.388943	0.335271	0.631011
Cre11.g467573	531.915	1013.8	309.333	923.263	725.697	985.928		0.524674	0.335043	0.736055
Cre12.g546700	5.81201	12.0251	3.95565	11.8081	6.79659	11.4381		0.483323	0.334995	0.594206
Cre10.g452100	147.477	355.264	116.282	347.139	222.883	351.829		0.415119	0.334972	0.633498
Cre09.g417100	7.3496	21.8606	6.74728	20.1535	11.3968	20.8986		0.336203	0.334794	0.545338
Cre16.g659700	350.469	782.391	249.423	745.203	473.566	726.883		0.447946	0.334705	0.651502
Cre09.g405400	23.348	66.0263	25.4606	76.0991	34.4923	55.5065		0.353617	0.334572	0.62141
Cre09.g397200	15.2935	41.8432	14.6325	43.7625	19.3969	53.1525		0.365495	0.334362	0.364929
Cre12.g550650	6.11178	16.6573	5.81226	17.3978	7.70895	15.0493		0.366913	0.33408	0.512246
Cre01.g013200	12.6145	24.3831	7.36371	22.0486	16.6845	26.007		0.517346	0.333976	0.641539
Cre06.g273100	13.9645	22.417	8.9687	26.884	14.1888	44.6822		0.622942	0.333607	0.317549
Cre01.g004450	53.6404	132.806	51.4927	154.371	62.0117	138.063		0.4039	0.333565	0.449155
Cre09.g392692	31.3937	71.92	31.0431	93.2723	47.6855	76.4932		0.436509	0.332822	0.623395
Cre12.g520450	14.6497	21.8671	8.44243	25.3794	19.4421	25.7695		0.669943	0.332649	0.754462
Cre16.g676197	9.30166	20.2779	8.54213	25.7329	12.799	25.5202		0.458709	0.331954	0.501524
Cre02.g111000	11.6725	19.1633	6.93657	20.9064	15.5754	21.6758		0.609107	0.331792	0.718562
Cre07.g321300	13.3369	32.7241	12.7167	38.3794	25.621	34.6452		0.407556	0.331342	0.739525
Cre10.g436500	5.34792	10.7409	3.88005	11.7139	71.2697	27.9537		0.497902	0.331235	2.54956
Cre01.g029300	54.6547	136.592	47.214	142.609	71.7681	129.121		0.400131	0.331073	0.555821
Cre12.g528450	58.8398	136.357	33.5653	101.542	42.1515	133.238		0.431513	0.330556	0.316362
Cre11.g467773	17.3472	44.7805	15.2202	46.0746	33.5956	55.0043		0.387383	0.330338	0.610781
Cre09.g396500	5.01119	12.5937	3.96755	12.0118	8.39957	20.5742		0.397912	0.330304	0.408257
Cre08.g358526	624.023	1182.17	358.853	1087.81	466.676	1238.17		0.527862	0.329886	0.376908
Cre17.g696350	7.2681	17.3984	6.35322	19.2796	13.2982	17.1884		0.417745	0.329531	0.773673
Cre12.g557050	38.672	101.827	36.0752	109.561	52.264	99.3587		0.379781	0.32927	0.526013
Cre06.g279150	23.8763	46.9255	16.2932	49.5052	29.8046	60.5336		0.508813	0.329121	0.492365
Cre06.g311700	7.98956	11.4383	4.46794	13.5829	19.363	16.7825		0.698492	0.328939	1.15376
Cre15.g644051	10.0641	14.7825	4.45408	13.5524	11.4457	9.51399		0.680812	0.328656	1.20304
Cre12.g526750	24.6769	62.6748	24.1256	73.5506	31.6937	66.5548		0.393729	0.328014	0.476205
Cre09.g386400	29.9756	52.9057	17.5992	53.911	35.9862	63.4687		0.566585	0.326449	0.566991
Cre09.g393210	11.8399	26.7667	8.96196	27.5047	15.4164	25.5895		0.442337	0.325834	0.60245
Cre02.g106850	7.47815	19.2736	6.0765	18.674	10.2277	20.5753		0.388	0.325399	0.497086
Cre06.g286550	7.79221	16.7535	6.02512	18.5232	9.90343	17.744		0.465109	0.325274	0.558128
Cre07.g341550	28.7371	54.8967	20.4699	62.9867	32.9607	57.0763		0.523476	0.324988	0.577485
Cre12.g503900	10.9636	14.7561	5.23534	16.1163	19.3915	15.179		0.742988	0.324848	1.27752
Cre08.g380250	734.367	1767.08	569.179	1754.83	1034.93	1652.95		0.415582	0.32435	0.626111
Cre17.g727950	6.6391	16.287	6.14189	18.9386	9.11388	19.5966		0.407632	0.324305	0.465075
Cre01.g045550	103.318	214.163	62.076	191.585	96.475	186.184		0.482427	0.324013	0.51817
Cre09.g402300	233.564	596.979	230.754	713.665	380.774	507.487		0.391243	0.323337	0.750313
Cre03.g175250	4.64634	13.1815	3.86508	11.9682	6.72953	13.7633		0.352489	0.322946	0.488947
Cre10.g434200	24.4922	50.572	17.5156	54.2708	23.6109	48.5372		0.484304	0.322744	0.48645
Cre01.g050950	117.198	331.506	103.705	321.927	200.79	333.458		0.353532	0.322138	0.602145
Cre07.g338150	5.0003	15.5536	4.82364	14.9841	4.71217	15.3095		0.321488	0.321917	0.307794
Cre08.g370401	19.0948	21.0926	7.53931	23.5204	29.8944	19.5519		0.905284	0.320543	1.52898
Cre07.g316000	52.0466	112.303	43.3203	135.274	82.4262	133.175		0.463448	0.320241	0.618931
Cre03.g178450	35.6375	84.5387	29.7751	93.1949	46.8091	92.0126		0.421552	0.319493	0.508725
Cre07.g332550	8.41664	17.3208	7.31915	22.9131	11.3191	23.6714		0.485927	0.319431	0.478176
Cre01.g031250	13.0097	26.8184	7.75676	24.3336	16.1598	23.9315		0.485104	0.318767	0.675252
Cre03.g190950	490.766	804.207	245.052	768.922	562.478	889.733		0.610248	0.318696	0.632187
Cre16.g690000	13.4381	18.7895	6.07527	19.1085	10.8002	20.0595		0.715192	0.317935	0.538408
Cre06.g293700	15.0376	37.5891	13.9443	43.8676	21.0969	36.3778		0.400052	0.317872	0.579939
Cre09.g397623	14.4156	14.5253	4.7394	14.9292	11.21	4.2745		0.992448	0.317458	2.62253
Cre02.g073650	14.2419	45.2339	15.8214	49.9482	18.9712	45.5606		0.31485	0.316756	0.416395
Cre09.g396650	15.0449	29.0941	8.64941	27.3202	12.8292	30.2615		0.517112	0.316594	0.423945
Cre12.g549852	10.8989	29.059	9.66992	30.5997	17.2218	33.0537		0.375061	0.316014	0.521025
Cre07.g344900	9.03493	20.2644	6.28369	19.8979	9.90403	14.3193		0.445852	0.315797	0.691656
Cre01.g070202	14.2972	23.2476	7.95772	25.312	15.0075	23.8677		0.614997	0.314385	0.628779
Cre10.g444800	15.1822	34.8125	10.4846	33.3867	20.1924	31.9773		0.436113	0.314035	0.63146
Cre12.g518950	3.60541	10.444	3.05559	9.73437	6.58454	13.7869		0.345214	0.313897	0.477594
Cre24.g755497	13.722	28.6651	8.41281	26.8341	23.1246	31.1714		0.478701	0.313512	0.741853
Cre08.g384750	9.93342	20.6969	4.76052	15.1939	10.8773	26.4091		0.479947	0.313318	0.411877
Cre10.g465900	9.71866	20.9159	7.03005	22.4407	17.7524	27.4372		0.464654	0.313272	0.647019
Cre48.g761147	47.874	76.9792	22.2169	70.9611	25.6166	23.3738		0.621908	0.313086	1.09595
Cre16.g665000	22.8651	51.7988	20.8847	66.8422	38.1413	67.339		0.441421	0.312448	0.566407
Cre17.g708300	10.386	28.872	10.9102	34.9238	17.5924	35.5065		0.359726	0.3124	0.49547
Cre03.g156950	136.952	362.461	151.326	486.542	183.244	249.902		0.377839	0.311024	0.733263
Cre16.g695950	17.407	58.5565	13.8495	44.5662	12.6424	43.2847		0.297268	0.310762	0.292075
Cre01.g052050	6.18811	14.0822	4.15226	13.3709	6.10115	13.8896		0.439428	0.310545	0.43926
Cre11.g468550	89.5587	187.098	74.3148	239.383	125.806	181.136		0.478673	0.310443	0.694539
Cre12.g534600	28.4397	64.5668	21.7473	70.0564	34.1834	66.168		0.440469	0.310426	0.516615
Cre06.g261650	9.3503	26.5268	8.49322	27.3701	11.9431	27.4044		0.352485	0.31031	0.43581
Cre12.g558000	49.9214	135.251	51.8061	167.061	58.069	123.779		0.369102	0.310103	0.469135
Cre09.g386650	689.462	1038.08	322.172	1041.29	560.172	948.356		0.66417	0.309397	0.590677
Cre07.g344550	18.6907	45.4614	14.5734	47.2151	20.2082	48.6064		0.411133	0.30866	0.415752
Cre17.g742132	8.59939	24.5457	5.34577	17.335	8.8836	20.0088		0.350342	0.30838	0.443985
Cre02.g096150	156.152	292.134	101.973	330.996	217.689	325.755		0.534522	0.308079	0.66826
Cre10.g421700	17.765	31.939	8.10094	26.2984	17.0236	36.276		0.556217	0.308039	0.46928
Cre11.g468350	3.26644	10.7166	3.36302	10.9193	3.31733	10.303		0.304802	0.307989	0.321977
Cre01.g016900	54.1606	202.842	57.5402	186.855	95.896	200.628		0.267009	0.30794	0.477979
Cre02.g078507	16.7568	44.9189	13.1584	42.738	24.0628	47.0842		0.373046	0.307885	0.511059
Cre17.g741850	47.178	119.504	39.4997	128.479	56.5928	136.4		0.394782	0.307441	0.414903
Cre13.g581400	9.7848	22.1347	6.26249	20.3899	11.2708	21.5445		0.442057	0.307137	0.52314
Cre13.g567700	61.0755	95.2101	37.0609	120.86	94.913	86.8599		0.641481	0.306643	1.09271
Cre10.g439150	17.6515	44.0045	14.7346	48.0548	24.9776	49.0295		0.401129	0.306621	0.50944
Cre07.g343101	193.17	426.698	162.043	528.567	321.121	363.037		0.452709	0.30657	0.884541
Cre16.g678050	2.51674	8.53394	3.18485	10.3888	2.83557	8.05186		0.29491	0.306566	0.352163
Cre09.g386747	10.8292	20.3058	8.44926	27.5737	17.0652	23.3568		0.533306	0.306425	0.730631
Cre02.g081650	4.09731	8.19255	2.95874	9.65843	4.55249	8.3615		0.500126	0.306338	0.544459
Cre07.g351850	6.13775	13.6184	4.16544	13.6039	8.79916	13.4384		0.450695	0.306195	0.654777
Cre16.g672300	28.4761	62.7343	20.6928	67.9447	42.9176	57.7538		0.453916	0.304554	0.743113
Cre09.g416150	113.86	241.866	75.7518	249.113	172.415	222.702		0.470757	0.304086	0.774196
Cre16.g660800	11.4813	41.8258	12.7133	41.8592	11.2563	44.5847		0.274503	0.303716	0.25247
Cre03.g150300	15.6382	35.73	13.115	43.2011	26.6149	41.6459		0.437677	0.30358	0.639076
Cre16.g674300	20.9599	57.0524	15.5974	51.4029	36.938	53.4365		0.36738	0.303434	0.69125
Cre09.g396772	11.8267	13.5532	5.09151	16.7825	23.7231	16.9059		0.872613	0.303382	1.40324
Cre01.g032600	22.4468	44.027	13.4132	44.2838	28.3684	48.7993		0.509842	0.302892	0.581328
Cre03.g174750	8.15727	23.1264	5.98839	19.8196	11.8524	22.7868		0.352725	0.302145	0.520143
Cre03.g208050	45.6971	145.846	42.3119	140.065	74.6067	140.822		0.313324	0.302088	0.529794
Cre02.g145050	7.20823	17.6971	4.82715	15.9862	12.105	17.4726		0.407311	0.301957	0.692799
Cre02.g106750	4.37252	13.917	3.70523	12.29	5.01401	13.5992		0.314186	0.301483	0.368699
Cre10.g443250	17.9502	40.7732	12.2428	40.7011	20.9926	47.8633		0.440245	0.300798	0.438595
Cre17.g710150	12.4348	26.5381	8.61848	28.7556	17.7549	34.9161		0.468564	0.299715	0.508502
Cre07.g315750	99.0458	230.878	69.6247	232.375	143.333	220.629		0.428996	0.299622	0.649656
Cre10.g428200	19.1632	47.0381	14.5669	48.7	24.8748	45.1014		0.407397	0.299115	0.551531
Cre01.g066917	5044.5	11715	3918.41	13101.5	7424.63	11063.6		0.430602	0.299081	0.671086
Cre16.g684850	5.49867	14.9099	5.51471	18.481	5.55573	20.0795		0.368793	0.298399	0.276687
Cre11.g480950	32.0236	64.2008	23.8392	79.9041	47.276	87.5956		0.498804	0.298348	0.539707
Cre16.g673953	7.64999	20.8645	6.54033	21.9598	13.6999	21.0468		0.366651	0.297832	0.650926
Cre07.g326800	9.17275	26.0144	7.21004	24.2554	10.1596	29.1181		0.352603	0.297255	0.34891
Cre06.g257601	485.667	1605.05	529.33	1782.97	866.182	1670.47		0.302587	0.296881	0.518526
Cre02.g114600	934.457	1226.11	369.219	1243.68	892.829	1235.9		0.762131	0.296876	0.722412
Cre17.g732000	746.976	1590.85	472.067	1592.32	972.828	1432.11		0.469545	0.296465	0.679297
Cre04.g225400	7.02665	25.4449	7.65136	25.8691	7.44094	28.2679		0.276152	0.295772	0.263229
Cre07.g332950	5.19428	9.73283	2.98998	10.1216	7.76255	9.66937		0.533687	0.295406	0.802798
Cre03.g181500	15.8748	35.1228	9.42361	31.9828	21.4246	35.3368		0.45198	0.294646	0.606297
Cre06.g300700	29.2406	83.0837	30.9217	105.103	67.4084	98.8359		0.351941	0.294204	0.682023
Cre05.g234639	16.6322	48.9614	17.452	59.3356	22.01	56.7191		0.3397	0.294124	0.388053
Cre13.g568316	21.2763	65.2987	11.7261	39.8946	18.2224	30.8518		0.32583	0.293927	0.590643
Cre12.g550850	1024.24	2281	687.247	2340.07	1406.89	2209.45		0.449031	0.293687	0.63676
Cre16.g675602	13.2968	33.1732	10.6636	36.323	22.3139	37.159		0.40083	0.293577	0.600498
Cre03.g189550	6.24683	15.7714	4.49813	15.3277	9.3807	20.4374		0.396086	0.293464	0.458997
Cre14.g614100	17.8027	41.825	12.6745	43.2083	26.3817	46.8862		0.425647	0.293335	0.562675
Cre08.g362900	10.8975	36.5256	10.8022	36.8844	15.7979	37.2283		0.298352	0.292866	0.424352
Cre05.g230850	6.1754	12.755	3.29204	11.2409	6.80543	13.3488		0.484155	0.292863	0.509816
Cre07.g334100	5.41255	11.9209	3.28184	11.2309	5.65972	12.5461		0.454039	0.292215	0.451114
Cre13.g588950	6.84926	18.4728	5.28309	18.1642	7.02491	12.7294		0.370775	0.290852	0.551865
Cre01.g019600	21.1371	44.5916	13.1473	45.2546	36.1511	50.5516		0.474015	0.290519	0.715133
Cre13.g562900	45.1898	152.053	48.0276	165.451	96.2165	153.498		0.297198	0.290283	0.626826
Cre12.g555550	6.32276	13.7568	3.89958	13.5294	8.70245	14.1968		0.45961	0.28823	0.612987
Cre13.g566000	8.78923	42.9271	10.2294	35.525	11.8256	48.0671		0.204748	0.287949	0.246023
Cre06.g274650	6.51926	17.2613	5.18686	18.0468	11.2785	24.3229		0.377681	0.287412	0.463699
Cre07.g320350	6.4422	34.4103	6.9885	24.3168	6.76084	32.8368		0.187217	0.287394	0.205892
Cre07.g325736	22.063	70.6154	21.4505	74.644	33.1253	69.9907		0.312439	0.287371	0.473281
Cre17.g715750	17.0673	37.6437	11.5824	40.3662	20.2204	41.5617		0.453391	0.286933	0.486515
Cre02.g089000	5.87768	9.45143	2.95736	10.3087	6.46291	9.03358		0.621883	0.28688	0.715432
Cre03.g185600	15.1562	34.427	8.95357	31.3429	12.7407	29.1148		0.440242	0.285665	0.437602
Cre14.g614900	13.9708	35.0807	10.5865	37.1731	13.3661	34.2508		0.398247	0.284789	0.390242
Cre01.g051400	25.9284	58.1136	19.0631	66.9719	31.1951	61.7207		0.446168	0.284643	0.505424
Cre06.g292050	5.22667	13.2701	3.66227	12.8785	5.96402	12.2286		0.393868	0.284371	0.487711
Cre03.g156750	21.4498	59.7165	16.1485	56.7969	30.9446	65.1062		0.359194	0.28432	0.475294
Cre14.g620400	11.8442	23.6178	7.15257	25.2018	18.7251	26.0877		0.501495	0.283812	0.717775
Cre17.g724300	1397.08	3558.53	934.688	3294.6	2218.96	2713.75		0.3926	0.283703	0.817673
Cre01.g005850	5.75689	35.425	13.8443	48.8246	11.0247	58.24		0.162509	0.283552	0.189298
Cre03.g144847	6.2832	12.5073	2.89264	10.2072	4.70337	11.779		0.502363	0.283392	0.399301
Cre06.g299500	4.04656	7.13483	3.11963	11.0331	5.4285	9.17424		0.567156	0.282752	0.591711
Cre12.g495951	206.556	437.051	154.261	545.914	349.261	440.552		0.472613	0.282574	0.79278
Cre03.g144707	3.7971	8.04904	2.72775	9.66216	8.0681	13.3261		0.471746	0.282313	0.605436
Cre12.g534250	9.12267	27.8024	8.86213	31.4004	12.7298	29.9376		0.328125	0.28223	0.425211
Cre02.g104850	9.70031	27.0234	6.83133	24.2331	9.58538	23.8397		0.35896	0.281901	0.402076
Cre12.g552200	47.1134	102.603	26.1245	92.7822	45.5319	99.2145		0.459182	0.281568	0.458924
Cre08.g358548	19.0657	43.5275	12.7406	45.3587	27.8161	46.7488		0.438015	0.280885	0.595012
Cre08.g373250	24.4624	63.3405	20.0991	71.7767	38.276	70.627		0.386205	0.280023	0.541946
Cre09.g387245	4.42326	9.619	3.25511	11.6425	5.88904	13.0599		0.459846	0.279589	0.450925
Cre17.g720250	1596.25	3704.36	1011.88	3626.35	2387.3	3579.29		0.430911	0.279035	0.666976
Cre17.g725350	15.3832	39.1933	11.4068	40.8841	20.5973	43.0942		0.392496	0.279003	0.47796
Cre05.g238332	1495.92	3908.38	1068.24	3845.62	2400.71	3697.38		0.382747	0.277781	0.6493
Cre13.g573400	98.8411	281.328	72.103	259.661	209.675	255.588		0.351338	0.277681	0.820363
Cre07.g330100	7.93183	20.6603	6.15391	22.1802	9.9909	21.441		0.383916	0.277451	0.465972
Cre12.g528550	8.10508	15.2289	5.04706	18.2127	12.4437	17.7402		0.532217	0.277118	0.701441
Cre13.g576466	282.155	622.651	211.635	764.221	421.534	493.403		0.453151	0.276929	0.85434
Cre05.g241300	34.5353	106.405	35.3657	127.934	59.4559	102.605		0.324565	0.276437	0.579464
Cre05.g241950	70.5984	240.893	54.6553	198.059	85.2795	241.719		0.29307	0.275955	0.352804
Cre08.g368450	18.1489	46.1878	18.5774	67.3988	30.159	55.8707		0.392937	0.275634	0.5398
Cre14.g620702	130.5	171.638	60.1314	218.191	112.461	208.371		0.760321	0.275591	0.539715
Cre06.g308950	24.0209	52.7282	14.1364	51.419	28.5374	62.94		0.455561	0.274926	0.453406
Cre12.g522450	6.95631	13.8416	3.54671	12.9318	5.6984	13.5427		0.502565	0.274263	0.420773
Cre02.g114450	9.36591	37.453	10.9438	39.9434	15.9812	41.678		0.250071	0.273983	0.383445
Cre01.g069107	7.96416	20.0284	5.9969	21.9154	15.3512	22.4815		0.397643	0.273639	0.682837
Cre12.g549450	12.3164	22.8502	6.65336	24.3923	19.71	29.4213		0.539006	0.272765	0.669923
Cre13.g602450	14.9172	43.6888	11.8738	43.657	31.0408	42.5162		0.341442	0.271979	0.730093
Cre10.g442700	8.91303	24.7177	6.72563	24.7457	9.84902	23.7177		0.360593	0.27179	0.41526
Cre06.g267850	5.79186	14.1311	3.56673	13.1694	6.56467	11.884		0.409866	0.270835	0.552396
Cre06.g250250	25.702	78.6694	21.254	78.529	28.2623	76.035		0.326709	0.270652	0.371701
Cre17.g697650	7.19973	16.818	5.10518	18.863	8.86273	19.3409		0.428097	0.270645	0.458238
Cre04.g214502	40.0029	69.9565	19.3253	71.4163	43.8882	74.3575		0.571825	0.270601	0.590232
Cre16.g653450	8.10267	7.76468	2.55848	9.50118	15.3203	9.49501		1.04353	0.26928	1.61351
Cre06.g278256	12.3958	31.1903	10.8208	40.2496	17.4922	37.8523		0.397425	0.268842	0.462117
Cre16.g674400	38.7558	89.8375	21.9665	81.8643	57.6497	80.8219		0.431399	0.268328	0.713293
Cre12.g521050	6.05789	15.2125	3.97004	14.8068	8.89534	14.0597		0.398218	0.268123	0.632683
Cre12.g538100	8.74271	14.6248	3.50108	13.0585	12.1796	17.4538		0.5978	0.268107	0.697819
Cre16.g689087	18.8233	41.1734	10.7023	39.9276	33.7159	57.707		0.457171	0.268043	0.58426
Cre05.g242400	75.2372	243.423	64.4715	240.598	88.7769	294.254		0.30908	0.267964	0.301702
Cre01.g033550	52.7663	99.546	34.7974	129.887	64.1721	127.237		0.53007	0.267905	0.504351
Cre03.g207900	10.0708	12.2584	4.01985	15.0419	17.2169	13.6716		0.821543	0.267243	1.25932
Cre03.g172300	173.328	220.404	55.0063	205.839	110.092	207.455		0.78641	0.26723	0.530679
Cre18.g748347	5.62661	23.4854	4.41144	16.5097	2.30435	11.9958		0.239579	0.267203	0.192096
Cre03.g194350	22.4441	38.2622	11.2896	42.4166	19.2071	38.2618		0.586587	0.26616	0.501992
Cre01.g026550	9.07429	26.7842	7.11866	26.781	12.1533	29.11		0.338793	0.26581	0.417496
Cre06.g307950	4.45195	12.8616	3.40017	12.7944	5.07221	13.7523		0.346143	0.265755	0.368826
Cre10.g456100	17.1605	44.59	13.2925	50.175	30.2136	51.0411		0.384851	0.264923	0.591946
Cre13.g562475	12.1531	28.6667	10.507	39.6662	19.4841	33.7402		0.423945	0.264885	0.577474
Cre16.g663100	7.71714	12.897	4.05857	15.3434	10.9887	14.0511		0.598367	0.264516	0.782053
Cre13.g567901	14.1299	26.6185	6.38864	24.181	20.454	31.7145		0.53083	0.264201	0.644942
Cre01.g038400	140.779	246.25	69.4415	262.84	147.047	270.165		0.571691	0.264197	0.544286
Cre12.g522600	195.349	398.17	156.718	593.919	239.278	350.913		0.490617	0.263871	0.681873
Cre04.g214150	823.988	1488.86	493.982	1875.65	1328.98	1541.52		0.553436	0.263366	0.862123
Cre01.g033400	17.285	54.9469	15.5727	59.1622	19.8915	55.6758		0.314576	0.26322	0.357274
Cre14.g630883	8.34398	33.0443	8.36408	31.8595	8.57826	37.3995		0.252509	0.26253	0.229368
Cre06.g288500	22.7207	39.1422	10.8623	41.4605	23.3164	43.8792		0.580466	0.261992	0.531377
Cre02.g088000	32.1509	107.114	26.1863	100.762	42.5926	107.709		0.300156	0.259883	0.395441
Cre12.g495450	10.1592	14.3046	2.9262	11.2724	7.00432	10.4125		0.710205	0.25959	0.672684
Cre02.g100400	25.8085	71.3531	20.5385	79.1264	38.9497	73.2319		0.361701	0.259566	0.531868
Cre03.g185100	6.21883	16.104	3.67267	14.2139	6.53665	17.7602		0.386167	0.258386	0.36805
Cre03.g168450	10.3532	28.0898	8.00073	31.0021	14.0548	33.4948		0.368575	0.258071	0.419611
Cre19.g750847	6.06953	16.9208	3.60858	14.0018	6.94748	19.6305		0.358702	0.257723	0.353913
Cre17.g734900	8.74174	24.4484	7.34775	28.5844	14.3219	30.9231		0.357559	0.257055	0.463146
Cre07.g335700	4.99138	16.6913	4.53692	17.717	10.1779	14.4044		0.299041	0.256077	0.706583
Cre12.g490650	5.91953	16.7203	3.97325	15.5216	8.02708	17.5866		0.354033	0.255982	0.456432
Cre10.g437500	63.9593	182.742	57.8842	226.364	105.93	173.671		0.349998	0.255713	0.609946
Cre06.g278185	56.381	77.5002	21.615	84.5876	65.9775	119.518		0.727495	0.255534	0.55203
Cre02.g143367	3.41273	3.04843	2.45865	9.6236	10.8096	7.86931		1.1195	0.255481	1.37364
Cre03.g190800	6.76156	10.4136	2.60862	10.212	9.90284	10.7021		0.649301	0.255447	0.925317
Cre18.g748297	21.5003	86.6296	16.5405	64.8041	8.55445	42.4961		0.248187	0.255238	0.2013
Cre03.g162000	8.14901	14.9584	4.19957	16.4762	11.4231	16.3446		0.544778	0.254887	0.698891
Cre12.g542250	246.083	455.771	104.337	409.665	288.283	421.312		0.539927	0.254689	0.684251
Cre10.g421300	4.34936	14.0841	2.61386	10.2634	10.3504	16.0485		0.308813	0.254678	0.644945
Cre10.g429880	10.0464	27.294	5.94538	23.4084	11.8105	26.5252		0.368081	0.253985	0.445256
Cre03.g151600	4.08607	12.3534	2.88185	11.3642	11.5394	19.6773		0.330765	0.25359	0.586432
Cre14.g619550	15.3381	42.8617	12.6902	50.1977	25.7783	56.5799		0.357851	0.252804	0.455609
Cre07.g339250	6.15739	17.5075	4.79458	18.974	7.11627	15.9787		0.3517	0.252692	0.44536
Cre06.g259150	9.20502	30.7335	7.10944	28.2088	12.6366	31.5123		0.299511	0.252029	0.401005
Cre08.g367400	0.766232	14.4382	2.71441	10.7723	1.58389	50.3304		0.0530698	0.251981	0.0314698
Cre11.g467736	5.28473	14.8134	2.69326	10.719	4.09361	8.54184		0.356753	0.25126	0.479242
Cre03.g207713	12.7532	32.603	7.60289	30.2976	13.7185	34.2534		0.391166	0.25094	0.4005
Cre17.g705900	14.8494	49.8878	12.8937	51.4477	17.6877	51.2204		0.297656	0.250618	0.345325
Cre07.g339200	4.00813	12.4977	2.61957	10.4579	4.74463	11.4362		0.320709	0.250487	0.414878
Cre03.g157800	3.5497	16.2099	3.22895	12.9272	5.30938	13.3446		0.218983	0.24978	0.397867
Cre10.g424400	43.3743	112.441	32.248	129.247	74.2463	134.442		0.385752	0.249507	0.552255
Cre01.g032700	11.8756	27.455	5.99591	24.1576	16.6896	31.1047		0.432548	0.2482	0.536562
Cre01.g043200	44.3288	129.034	35.6844	144.021	82.9406	115.871		0.343544	0.247772	0.715801
Cre09.g396300	20.3907	53.486	11.2735	45.5257	25.5022	54.9292		0.381234	0.247629	0.464274
Cre02.g144800	10.6027	35.9396	7.40259	29.9384	9.62404	30.9583		0.295014	0.247261	0.310871
Cre06.g299550	5.99073	18.5645	9.66705	39.3155	10.0838	27.5152		0.322698	0.245884	0.366481
Cre12.g531450	13.6195	22.9149	6.10715	24.9027	12.1521	23.6609		0.594351	0.24524	0.513594
Cre02.g107450	11.8042	22.318	6.73656	27.5587	18.5285	31.1122		0.528909	0.244444	0.595538
Cre03.g165100	750.464	2116.98	525.328	2157.4	1282.45	2110.94		0.354497	0.243501	0.607526
Cre02.g087700	22.6341	60.3294	14.3567	58.9978	35.2875	77.8659		0.375175	0.243343	0.453183
Cre10.g439700	12.9644	88.2666	14.4321	59.4012	10.5148	116.062		0.146878	0.24296	0.0905964
Cre08.g358553	7.20571	14.7667	2.80129	11.5553	4.18645	10.3936		0.48797	0.242425	0.402791
Cre07.g344950	449.632	1221.36	268.753	1111.61	716.703	1193.95		0.36814	0.241769	0.600279
Cre07.g334550	458.95	1331.67	367.995	1522.48	904.862	1413.91		0.344642	0.241708	0.639971
Cre13.g569750	10.8427	32.5033	7.1626	29.6506	10.0832	26.992		0.333588	0.241567	0.373563
Cre16.g673650	936.03	2585.77	636.253	2639.65	1520.79	2670.57		0.361993	0.241037	0.569463
Cre02.g143250	44.9613	113.296	25.7305	106.86	44.9344	118.663		0.396848	0.240787	0.378672
Cre16.g677500	12.4681	26.4726	7.51244	31.3807	21.596	35.2521		0.470981	0.239397	0.612616
Cre12.g523300	13.2286	30.5168	8.02261	33.5201	18.3825	37.2403		0.433486	0.239337	0.493618
Cre16.g650425	2.85842	12.5953	2.36396	9.8991	5.13545	11.5561		0.226943	0.238806	0.444393
Cre10.g425900	446.021	1319.61	307.671	1289.43	703.242	1150.23		0.337995	0.23861	0.611393
Cre03.g182551	6317.83	16404.9	3481.6	14621.2	10112.9	12749		0.385118	0.23812	0.793231
Cre16.g687900	793.723	2002.62	422.633	1780.73	1394.2	1894.86		0.396342	0.237337	0.73578
Cre09.g399552	5.21645	30.8085	5.07404	21.4674	4.18443	37.6342		0.169319	0.23636	0.111187
Cre02.g108900	30.4459	54.4218	11.5545	48.9377	48.5167	58.1617		0.559443	0.236106	0.834169
Cre15.g641266	3.41665	7.0259	2.25255	9.56611	5.74	11.3589		0.486294	0.235472	0.505331
Cre07.g324500	4.14078	11.0076	3.27083	13.8984	5.52616	13.9193		0.376175	0.235339	0.397014
Cre09.g387875	128.014	217.435	52.1839	221.837	86.0111	157.223		0.588746	0.235235	0.547064
Cre16.g663500	5.4423	14.521	3.83612	16.3106	8.95678	17.5949		0.374788	0.235192	0.509055
Cre12.g505950	5.81119	22.6533	5.23594	22.2946	8.20063	24.2162		0.256527	0.234852	0.338642
Cre06.g278210	36.4971	104.39	21.2989	90.7571	47.1716	108.133		0.349623	0.23468	0.436237
Cre12.g489700	16.5717	46.2855	9.24646	39.4235	24.3477	43.8489		0.358032	0.234542	0.555264
Cre08.g370500	3.47708	13.6706	3.13573	13.4694	3.95349	13.4508		0.254347	0.232804	0.293922
Cre07.g318450	76.1337	145.203	44.8978	193.073	89.4962	132.273		0.524326	0.232543	0.676602
Cre12.g541550	8.29184	19.2699	3.83929	16.5201	9.34856	19.1713		0.4303	0.232401	0.487633
Cre01.g007350	6.5973	10.7998	2.94117	12.7172	11.7301	12.3433		0.610872	0.231275	0.950321
Cre17.g722500	5.36473	13.6184	3.58278	15.5827	9.44367	15.4119		0.393932	0.22992	0.612752
Cre09.g409500	11.7544	27.9	5.26193	22.9166	11.3729	33.2082		0.421305	0.229612	0.342473
Cre06.g263400	5.97834	15.1353	3.45156	15.0526	9.63345	16.4119		0.394993	0.2293	0.58698
Cre06.g278168	7.60067	29.8574	7.6416	33.4559	10.2001	34.4679		0.254566	0.228408	0.29593
Cre09.g390050	19.5315	49.5002	11.8331	51.8778	25.0195	51.8917		0.394574	0.228096	0.482148
Cre08.g382950	39.3416	91.5427	18.6107	81.6441	48.1913	103.689		0.429762	0.227949	0.464768
Cre08.g378650	5.69415	17.942	4.27942	18.7764	9.74793	24.555		0.317364	0.227915	0.396984
Cre12.g553250	23.1402	55.4832	11.9283	52.3616	29.1917	60.9322		0.417067	0.227806	0.479085
Cre07.g347150	24.6057	39.6139	11.9438	52.4612	28.8416	46.6754		0.621138	0.227669	0.617919
Cre04.g217910	5.4458	15.6503	3.46709	15.2476	10.9313	19.956		0.347968	0.227386	0.54777
Cre13.g591951	6.49607	19.3873	3.78727	16.7924	6.73156	17.5376		0.335068	0.225535	0.383836
Cre12.g543900	3.71042	10.8814	2.44542	10.861	9.3931	14.3191		0.340987	0.225156	0.655984
Cre17.g724350	16.4725	47.4202	11.8518	52.9571	26.6765	53.9451		0.347373	0.2238	0.494512
Cre08.g372550	9.5228	15.9758	4.14096	18.5193	22.5162	20.1342		0.596077	0.223602	1.11831
Cre03.g177500	9.57896	22.8594	5.39204	24.1947	20.9672	26.1155		0.419038	0.22286	0.802864
Cre12.g510050	97.2118	293.457	50.2492	226.521	107.288	259.152		0.331264	0.22183	0.413996
Cre16.g664700	3.94957	12.4043	2.50537	11.3167	4.96531	14.3261		0.318403	0.221387	0.346592
Cre03.g165700	42.6929	86.5521	14.5316	65.7965	34.5225	75.3678		0.493262	0.220857	0.458054
Cre03.g208000	38.4845	80.9221	20.395	92.4974	45.0752	74.5923		0.475575	0.220493	0.604288
Cre12.g519850	4.79491	12.0624	2.6306	11.936	8.85159	10.8089		0.397509	0.220392	0.818917
Cre06.g284250	21.4618	65.3992	14.1934	64.7803	40.894	50.6114		0.328166	0.219101	0.808
Cre12.g486300	608.23	1930.03	396.148	1820.02	1061.09	1811.24		0.31514	0.217661	0.585836
Cre06.g272650	637.829	1752.98	416.9	1922.76	1046.51	1546.91		0.363854	0.216824	0.676516
Cre02.g101700	6.52044	11.4114	2.84582	13.2392	11.954	10.6884		0.571397	0.214954	1.11841
Cre07.g345500	3.30957	10.7895	2.23442	10.4063	4.37846	13.2651		0.30674	0.214718	0.330074
Cre09.g405550	4.5392	20.2972	3.90518	18.5341	5.95086	19.9977		0.223637	0.210702	0.297577
Cre05.g233950	357.01	827.87	182.128	865.575	612.27	866.058		0.431239	0.210413	0.706962
Cre07.g332500	8.62421	17.4524	3.40763	16.2002	10.038	19.9707		0.494156	0.210345	0.502636
Cre01.g002300	379.798	772.831	188.629	897.558	545.839	823.685		0.491437	0.210158	0.662679
Cre03.g168950	7.37009	28.817	6.02156	28.6925	13.9807	27.1844		0.255755	0.209865	0.514291
Cre06.g258850	31.8751	58.5055	15.8918	75.8576	41.3939	67.9465		0.544822	0.209495	0.609213
Cre04.g215050	3.32923	18.2606	3.93945	18.8101	10.9161	24.0766		0.182318	0.209433	0.45339
Cre03.g165350	5.59483	11.508	2.90425	13.8863	8.64229	16.3565		0.486169	0.209145	0.52837
Cre09.g389050	8.33294	28.5975	6.36353	30.4489	4.41317	21.7405		0.291387	0.20899	0.202993
Cre16.g673050	4.21458	13.3876	2.88837	13.8447	4.07074	7.76978		0.314812	0.208626	0.52392
Cre03.g152150	23.8035	57.8139	12.1592	58.6245	23.1102	54.6086		0.411726	0.207408	0.423197
Cre06.g261450	73.2543	146.186	35.7454	172.447	119.175	152.679		0.501103	0.207283	0.780559
Cre09.g396401	3.40942	17.8417	2.95803	14.3222	6.32208	21.5814		0.191093	0.206535	0.292941
Cre17.g722800	4.01942	19.903	3.39541	16.4535	5.03564	18.7825		0.20195	0.206364	0.268103
Cre01.g010500	6.17807	25.0116	5.13273	24.8949	9.96106	27.7824		0.247008	0.206176	0.358538
Cre06.g285250	965.029	2583.45	599.853	2909.99	1732.04	2360.14		0.373543	0.206136	0.733872
Cre08.g383300	9.60779	21.8274	6.66105	32.3776	15.6846	20.7583		0.440171	0.20573	0.755582
Cre12.g560950	477.509	1719.54	338.731	1647.16	836.368	1558.78		0.277696	0.205645	0.536553
Cre02.g081050	69.1351	415.885	95.8968	468.337	67.3191	536.285		0.166236	0.20476	0.125529
Cre14.g631900	10.924	41.5066	7.47827	36.7119	13.9916	49.1011		0.263187	0.203702	0.284955
Cre11.g467572	5.47861	15.571	4.5966	22.5737	13.3793	20.306		0.351847	0.203626	0.658884
Cre07.g330250	697.808	2620.84	507.202	2491.69	1186.97	1973.71		0.266254	0.203557	0.60139
Cre17.g731200	5.19262	23.514	3.5469	17.5391	4.30174	16.846		0.220831	0.202228	0.255357
Cre12.g492950	12.591	35.1803	7.00988	34.6732	16.0677	34.9801		0.357899	0.20217	0.459338
Cre12.g534500	9.73843	28.679	7.05157	34.9381	16.7789	32.3859		0.339567	0.20183	0.518093
Cre12.g515150	7.83346	30.619	7.27175	36.375	14.669	29.3618		0.255837	0.199911	0.499595
Cre10.g417600	3.45817	14.5099	2.32673	11.6401	1.03259	5.70969		0.238332	0.199889	0.180849
Cre11.g467535	22.5668	67.2109	12.0858	60.615	29.4673	71.4324		0.335761	0.199386	0.41252
Cre04.g215150	7.04216	24.2587	4.4037	22.0888	9.2555	26.5726		0.290294	0.199363	0.34831
Cre10.g424450	13.3241	44.7373	9.41098	47.2067	14.7391	43.9705		0.29783	0.199357	0.335204
Cre17.g712100	9.6178	26.2432	5.18249	26.1231	13.7711	36.6502		0.366487	0.198387	0.375744
Cre17.g731950	78.3267	256.149	52.2261	263.329	134.662	243.563		0.305786	0.19833	0.552884
Cre17.g713350	59.6656	163.249	28.958	146.077	71.8509	159.846		0.365488	0.198238	0.449501
Cre07.g319100	5.36644	17.564	3.53239	17.8459	8.99148	19.1679		0.305536	0.197938	0.469091
Cre07.g339050	10.6828	28.0943	6.25399	31.6834	13.2368	33.938		0.380248	0.19739	0.390029
Cre08.g362450	22.5378	77.884	14.5998	74.1883	21.0694	74.4193		0.289377	0.196794	0.283117
Cre01.g044550	6.02178	32.2074	5.25041	26.8837	6.47253	26.701		0.186969	0.195301	0.242408
Cre07.g324550	4.69839	16.71	2.94018	15.0571	5.105	15.8448		0.281172	0.195269	0.322188
Cre12.g549550	163.466	344.52	72.3681	370.72	232.538	375.911		0.474475	0.19521	0.618599
Cre02.g083800	14.5447	38.2788	8.21648	42.1687	22.6967	63.2461		0.379968	0.194848	0.358863
Cre10.g459400	14.7718	55.583	10.408	54.0314	18.3152	45.0877		0.265761	0.192629	0.406213
Cre01.g014350	31.4179	101.799	20.7013	107.517	45.0221	103.482		0.308627	0.19254	0.435072
Cre06.g308900	4.41511	14.159	2.73172	14.2806	4.27616	11.1634		0.311824	0.191289	0.383052
Cre12.g538150	5.0945	18.2213	4.3565	22.8024	8.14949	22.1427		0.27959	0.191054	0.368044
Cre16.g675550	75.8133	223.149	51.2218	268.528	144.869	195.062		0.339743	0.19075	0.742682
Cre07.g332150	4.9195	20.2406	5.28248	27.7305	8.09548	18.6301		0.243051	0.190493	0.434538
Cre09.g390604	7.12875	27.2296	5.29363	27.7923	11.1988	30.8911		0.261801	0.190471	0.362525
Cre16.g680230	91.6538	167.707	44.8426	236.152	107.975	149.483		0.546511	0.189889	0.722323
Cre17.g700000	4.77868	21.5215	4.00266	21.1781	6.36831	25.7766		0.222042	0.189	0.247058
Cre03.g193850	35.408	87.6455	14.9551	79.1861	36.0507	81.4301		0.403991	0.18886	0.44272
Cre02.g086100	15.7455	37.8383	8.45315	44.8519	29.5368	35.8404		0.416126	0.188468	0.82412
Cre11.g477950	5.43332	19.6482	3.86497	20.5161	6.56886	15.9751		0.27653	0.188387	0.411194
Cre16.g672800	19.7337	49.2334	9.12927	48.4682	30.5953	56.6085		0.400819	0.188356	0.540472
Cre04.g213050	3.75757	9.78042	1.98839	10.6001	7.35368	11.7756		0.384193	0.187582	0.624485
Cre08.g370450	33.5026	79.3472	14.1956	75.8818	43.1416	81.7806		0.422228	0.187075	0.527529
Cre01.g053950	3.80803	18.0311	2.62356	14.0413	3.0773	22.7328		0.211192	0.186846	0.135368
Cre01.g013100	5.05524	7.68316	1.91879	10.2791	3.68556	6.50371		0.657964	0.186669	0.566686
Cre06.g276001	43.4884	166.478	32.9737	176.726	59.6559	143.231		0.261226	0.186581	0.416501
Cre02.g082750	118.709	347.188	117.443	631.89	199.273	316.176		0.341916	0.18586	0.63026
Cre07.g355600	12.3631	27.8917	5.49833	29.6882	12.4757	25.6895		0.443254	0.185203	0.485634
Cre13.g572900	6.81711	21.9346	4.1995	22.7055	7.52397	24.7428		0.310793	0.184955	0.304087
Cre13.g586300	53.479	193.55	35.8723	194.38	82.2171	192.711		0.276306	0.184547	0.426634
Cre03.g205950	6.41838	29.3962	4.69143	25.4542	6.97192	29.7336		0.21834	0.184309	0.23448
Cre17.g720350	7.48582	18.4094	3.60416	19.571	17.1256	21.2954		0.40663	0.184158	0.804192
Cre09.g394065	69.7272	140.278	26.7804	145.45	162.059	157.658		0.497064	0.184121	1.02791
Cre06.g291150	5.85495	20.3922	3.4895	19.0034	4.70206	16.7542		0.287117	0.183625	0.28065
Cre05.g240550	4.10751	20.2784	3.68484	20.1409	7.17164	22.4004		0.202556	0.182953	0.320157
Cre03.g180300	3.09076	12.2147	1.96148	10.7253	4.46409	14.9842		0.253036	0.182883	0.29792
Cre05.g233900	12.43	45.9486	8.08988	44.2412	21.2294	53.542		0.27052	0.182859	0.3965
Cre07.g313143	7.05992	14.7103	2.70575	14.8138	11.0426	13.3694		0.47993	0.182651	0.825961
Cre10.g420350	1216.61	4249.51	760.041	4173.49	2228.22	3310.13		0.286294	0.182112	0.673152
Cre12.g519350	30.602	103.18	17.105	94.6629	43.337	94.7757		0.296588	0.180694	0.457259
Cre10.g455850	6.79875	16.8189	2.88945	16.0904	10.2895	18.092		0.404233	0.179576	0.568732
Cre09.g407600	5.94816	21.9608	4.5232	25.243	8.51945	17.0155		0.270854	0.179186	0.500688
Cre02.g142206	34.8942	104.208	18.3168	102.248	48.3217	106.021		0.334851	0.179141	0.455775
Cre12.g491050	13.6977	21.2514	4.0636	22.7233	24.3715	21.7381		0.644555	0.17883	1.12114
Cre12.g519300	24.3542	75.5072	15.1345	84.9285	31.2626	77.7218		0.322541	0.178203	0.402237
Cre03.g209841	7.14132	36.4749	6.93982	39.0112	17.7533	45.9715		0.195787	0.177893	0.386181
Cre03.g148500	2.33326	8.7559	1.92055	10.7995	3.00031	10.8254		0.266479	0.177837	0.277155
Cre09.g386155	3.21549	11.2096	1.97652	11.1738	3.29206	8.10773		0.286851	0.176889	0.40604
Cre03.g171350	33.2841	76.4994	14.9488	84.6363	42.0678	79.6655		0.43509	0.176624	0.528055
Cre07.g315900	7.67015	23.0686	4.32956	24.5183	12.1626	26.346		0.332493	0.176585	0.461649
Cre03.g161150	4.8599	9.01892	1.79448	10.2101	9.78198	13.6141		0.538856	0.175755	0.718518
Cre12.g557250	8.51378	21.5336	3.89159	22.2372	10.8908	22.7607		0.395372	0.175004	0.478491
Cre10.g452050	297.358	1160.29	207.21	1184.27	510.054	1024.34		0.256279	0.174969	0.497934
Cre07.g356600	8.17422	31.3779	7.16371	41.4919	10.8708	36.1668		0.260509	0.172653	0.300574
Cre06.g273500	8.18092	21.1294	4.08052	23.7998	6.88743	22.9865		0.387182	0.171452	0.299629
Cre09.g387171	21.8094	68.4769	12.3402	72.4034	35.0466	105.457		0.318493	0.170437	0.332331
Cre03.g204250	626.592	1220.61	205.867	1215.65	466.14	1497.84		0.513343	0.169347	0.311208
Cre09.g392350	192.417	975.788	193.95	1145.38	197.597	926.731		0.197191	0.169332	0.213219
Cre12.g508750	359.804	1515.92	232.027	1371.19	638.507	1407.72		0.23735	0.169216	0.453575
Cre06.g255300	3.74299	13.8755	2.39742	14.2128	3.46005	12.0009		0.269755	0.16868	0.288316
Cre03.g204850	4.4429	6.8955	1.76984	10.5533	7.79675	8.54044		0.644319	0.167705	0.912921
Cre10.g452650	9.05955	45.0662	7.28529	43.5287	14.6001	45.7922		0.201028	0.167368	0.318834
Cre03.g172550	8.32137	49.6684	8.00799	47.9006	7.3741	47.0593		0.167539	0.167179	0.156698
Cre06.g283050	478.956	1646.89	340.471	2048.69	844.449	1453.77		0.290825	0.16619	0.580868
Cre13.g592200	18.9843	52.3127	8.92879	53.8676	17.0809	58.4641		0.3629	0.165754	0.29216
Cre09.g398700	3.53164	19.1632	3.46672	20.9308	7.01561	23.607		0.184293	0.165628	0.297183
Cre16.g690431	32.1045	109.1	16.3453	99.2337	37.0944	122.987		0.294267	0.164715	0.301612
Cre12.g542150	7.5246	29.2493	4.66244	28.3574	13.1947	24.705		0.257257	0.164417	0.53409
Cre06.g284200	24.0551	81.777	11.066	67.3917	46.4128	79.4299		0.294155	0.164204	0.584324
Cre06.g296500	4.14315	17.6745	2.97102	18.1247	5.2172	19.8634		0.234414	0.163921	0.262654
Cre03.g180350	11.0754	31.3092	6.42245	39.3393	24.2281	36.0142		0.353743	0.163258	0.672737
Cre07.g336950	38.1856	119.432	18.7362	114.909	51.869	156.945		0.319727	0.163053	0.330492
Cre10.g442050	13.3844	32.813	5.30233	32.763	10.1451	29.106		0.407899	0.161839	0.348557
Cre09.g410332	4.53119	20.37	1.88831	11.7317	2.99094	8.08221		0.222444	0.160958	0.370065
Cre09.g394436	90.5372	263.165	39.4825	246.455	118.24	291.418		0.344032	0.160202	0.40574
Cre02.g088200	86.1358	202.698	36.3645	227.236	89.3885	230.314		0.424946	0.16003	0.388116
Cre05.g244950	25.3611	55.9162	10.8096	67.8901	31.3852	64.0365		0.453555	0.159222	0.490114
Cre04.g226811	7.46145	33.2035	4.64227	29.2613	9.70394	32.4384		0.224719	0.158649	0.29915
Cre01.g029950	8.29894	58.3983	9.21705	58.27	8.74089	66.7919		0.142109	0.158178	0.130868
Cre16.g681750	11.5943	69.1647	8.286	52.7303	4.9012	98.2292		0.167633	0.157139	0.0498956
Cre09.g387838	19.8871	76.0045	12.5403	81.3579	29.6751	80.8625		0.261657	0.154137	0.366982
Cre06.g275000	3.39482	10.8347	1.50364	9.80376	7.70877	12.1666		0.313328	0.153374	0.633601
Cre06.g259450	2.48738	11.785	2.29743	15.0501	5.4391	12.0756		0.211063	0.152652	0.450421
Cre17.g746997	45.1274	160.733	21.2448	140.091	53.637	176.882		0.28076	0.15165	0.303236
Cre16.g678150	2.54101	8.55432	1.4443	9.54819	4.49167	10.8505		0.297044	0.151264	0.41396
Cre02.g111450	14.5775	65.7127	8.94813	59.1695	26.8377	67.1501		0.221837	0.151229	0.399667
Cre10.g434250	7.7656	34.9263	4.86376	32.1725	9.41034	36.7899		0.222342	0.151178	0.255786
Cre04.g232104	998.104	4455.56	855.879	5693.11	1787.3	3735.89		0.224013	0.150336	0.478413
Cre09.g386756	5.51981	26.4022	3.78635	25.2961	11.4922	27.7213		0.209066	0.149681	0.414562
Cre14.g626900	18.209	44.8101	7.8572	53.2748	26.5388	65.5378		0.406359	0.147484	0.404939
Cre16.g693900	4.51537	16.6759	2.29738	15.801	3.56849	15.3956		0.270772	0.145395	0.231786
Cre03.g172500	8.50978	39.661	5.02316	34.9526	13.2796	40.6946		0.214563	0.143713	0.326323
Cre10.g433950	93.1596	283.937	41.6204	293.018	211.808	335.372		0.3281	0.14204	0.631561
Cre03.g198250	7.95667	18.2318	13.0567	91.9521	14.5727	43.6471		0.436417	0.141995	0.333876
Cre17.g741000	28.6058	67.7859	11.4177	80.4315	34.5466	80.6761		0.422002	0.141956	0.428214
Cre10.g421750	8.45849	32.537	4.81259	34.1253	11.708	28.5078		0.259965	0.141027	0.410695
Cre21.g752647	19.517	60.4599	10.298	73.3816	32.7163	59.2575		0.322809	0.140335	0.552104
Cre02.g092400	7.29105	35.8788	5.36381	39.2399	11.1712	31.5982		0.203213	0.136693	0.353539
Cre02.g116700	11.0776	43.7852	3.40877	25.131	7.87707	21.9857		0.252999	0.13564	0.358282
Cre06.g291550	6.75412	20.741	3.19451	23.5552	11.7115	26.3362		0.325641	0.135618	0.444692
Cre13.g563050	6.8496	14.4703	2.30043	16.9628	10.9209	15.6279		0.473356	0.135616	0.698808
Cre12.g551900	16.334	64.6049	8.71651	64.7003	21.2948	76.0368		0.252829	0.134721	0.280059
Cre12.g504050	3.30206	14.0753	1.36516	10.1961	3.44849	10.892		0.2346	0.13389	0.316608
Cre09.g397900	5.92086	23.34	3.31031	24.8375	6.50384	26.2313		0.253679	0.133279	0.247942
Cre12.g560300	20.1459	70.841	8.36801	63.2077	18.7349	68.4178		0.284382	0.132389	0.273831
Cre03.g189350	10.4142	48.7341	5.40917	40.9231	21.4121	60.3288		0.213694	0.132179	0.354923
Cre12.g546550	4.75202	95.9773	14.0808	107.643	73.671	332.138		0.0495119	0.13081	0.221808
Cre03.g199150	6.34379	22.7521	2.95934	22.6292	12.2853	28.4333		0.278822	0.130775	0.432074
Cre06.g261300	2.98921	13.8817	1.61898	12.4458	3.28581	11.1472		0.215335	0.130082	0.294766
Cre08.g378150	6.18195	22.5804	2.56482	19.7991	5.95884	22.8575		0.273775	0.129542	0.260695
Cre09.g401600	9.99551	31.7569	4.93757	38.3302	17.3566	45.0169		0.314751	0.128817	0.385557
Cre01.g021050	3.01409	17.7265	2.24425	17.4842	3.35476	19.9413		0.170033	0.128359	0.168232
Cre02.g080600	1.95436	6.27884	1.41009	11.1095	1.43303	4.37078		0.311261	0.126927	0.327866
Cre16.g651000	3.78711	12.0355	1.33102	10.5229	6.51253	14.0021		0.314662	0.126488	0.465111
Cre06.g295700	3.64998	11.326	1.22121	9.67091	4.75932	9.73812		0.322266	0.126277	0.488731
Cre12.g551800	7.56417	38.2585	6.0168	47.7844	15.9858	55.8987		0.197712	0.125916	0.285978
Cre12.g548950	1694.1	8373.1	1018.79	8282.69	3164.93	7237.03		0.202326	0.123002	0.437324
Cre17.g727300	12.5108	36.8937	3.7219	30.3547	12.6851	20.4454		0.339104	0.122614	0.620438
Cre06.g278167	1.93943	16.296	2.05765	17.227	3.15851	23.0149		0.119013	0.119443	0.137238
Cre03.g156900	314.636	1285.42	156.459	1314.2	570.879	1413.43		0.244773	0.119053	0.403896
Cre17.g708750	11.8815	23.2459	3.10934	26.1337	34.3262	39.6879		0.511122	0.118978	0.864903
Cre06.g283950	190.95	956.17	133.426	1131.16	379.28	867.668		0.199703	0.117955	0.437126
Cre12.g540051	2.50104	13.4693	1.54017	13.0824	2.79947	13.8914		0.185684	0.117728	0.201525
Cre12.g526800	18.0029	71.9223	8.07873	68.7255	27.036	90.0568		0.25031	0.117551	0.300211
Cre09.g393200	14.4487	74.344	7.63476	65.7298	21.7319	79.3152		0.194349	0.116154	0.273994
Cre06.g278213	258.597	1383.64	159.37	1374.63	557.498	1364.38		0.186896	0.115937	0.408609
Cre12.g515850	15.6146	46.4662	5.82282	50.5262	28.7552	50.3546		0.336042	0.115244	0.571054
Cre11.g467590	5.22362	27.3132	3.10776	27.231	6.94993	29.0514		0.191249	0.114126	0.239229
Cre12.g559800	21.7261	89.5905	10.0123	93.4153	43.7125	86.8559		0.242505	0.107181	0.503276
Cre02.g097800	5.2654	104.255	3.4466	32.5004	5.40372	213.008		0.050505	0.106048	0.0253686
Cre19.g751047	24.8611	151.489	10.9686	104.881	18.6184	225.95		0.164112	0.104581	0.0824005
Cre08.g365900	0.301023	9.54298	1.54191	14.8057	2.85122	32.4123		0.0315439	0.104143	0.0879672
Cre09.g412400	4.87528	19.6438	1.75453	16.8574	11.5581	22.0079		0.248184	0.104081	0.52518
Cre13.g589400	4.23669	17.2507	1.94363	18.7062	5.70176	16.8129		0.245595	0.103903	0.33913
Cre10.g446350	6.18066	32.8677	2.90012	28.0255	10.5772	33.8615		0.188047	0.103481	0.312367
Cre16.g667850	12.7318	43.4879	4.5119	44.2523	22.5079	42.1968		0.292766	0.101959	0.533403
Cre12.g550702	22.0523	59.8073	7.13218	71.9573	44.0422	91.4137		0.368723	0.0991168	0.48179
Cre03.g151650	0.481976	27.1136	2.11265	21.4477	1.12259	32.5272		0.0177762	0.0985024	0.0345123
Cre06.g281600	1.19128	19.6424	1.10949	11.2743	1.74441	51.5024		0.0606484	0.0984088	0.0338705
Cre09.g386167	6.35535	24.7257	3.07108	31.5297	9.57488	23.5438		0.257034	0.0974028	0.406684
Cre12.g485150	107.069	355.901	31.7698	328.509	117.04	391.113		0.300839	0.0967091	0.299249
Cre12.g558100	9.12595	59.3286	6.76086	70.5214	10.3396	70.7864		0.15382	0.0958696	0.146068
Cre12.g522950	11.3538	37.4839	3.50044	36.8077	21.7289	40.0028		0.302898	0.0951008	0.543184
Cre02.g118600	6.62049	27.3452	2.18979	23.1304	13.9564	31.7779		0.242108	0.0946715	0.439186
Cre14.g625450	6.64915	30.254	2.86982	30.4756	14.1999	37.4713		0.219778	0.0941678	0.378954
Cre05.g248400	3.96996	88.8121	3.92778	45.2002	5.65501	177.478		0.0447007	0.0868974	0.0318632
Cre09.g386753	19.4994	86.7292	9.49025	109.217	33.3184	72.0205		0.224831	0.0868935	0.462624
Cre08.g368226	2.74058	13.4671	1.09587	12.7315	4.47842	13.2758		0.203502	0.0860755	0.337337
Cre07.g344400	8.18811	80.197	7.26425	84.4992	12.1065	137.431		0.1021	0.0859683	0.0880915
Cre05.g248450	1.79741	49.3821	1.76731	20.5606	2.86289	116.033		0.036398	0.0859561	0.0246731
Cre26.g756747	0.864932	22.7682	1.04985	12.2747	0.531121	9.87579		0.0379886	0.0855296	0.0537801
Cre04.g223300	2.00985	87.3199	3.315	40.2855	6.46558	194.542		0.0230171	0.0822877	0.0332349
Cre04.g222750	1.42755	53.5313	2.96006	36.943	3.80253	118.494		0.0266676	0.0801251	0.0320905
Cre07.g324200	9.68795	59.8377	4.16705	52.683	10.7334	63.1848		0.161904	0.0790967	0.169873
Cre07.g338000	2.84249	13.5871	0.915698	11.6478	5.19268	16.8958		0.209205	0.0786155	0.307336
Cre12.g555500	1.0275	7.94798	0.776567	10.1268	2.0132	11.6845		0.129278	0.0766843	0.172297
Cre01.g053000	2.76974	12.7552	1.03817	14.1067	2.76946	20.2778		0.217146	0.0735941	0.136576
Cre09.g414000	2.08651	17.2505	1.05129	14.7808	3.95224	16.2694		0.120954	0.0711254	0.242925
Cre02.g142186	2.19134	11.4291	0.717687	10.5382	4.04939	12.4445		0.191733	0.0681034	0.325396
Cre11.g467553	3.28515	15.0971	0.881761	13.3017	3.96185	15.9026		0.217601	0.0662893	0.249132
Cre09.g403071	4.82342	26.363	1.90575	29.5977	8.63224	27.643		0.182962	0.0643884	0.312276
Cre03.g184250	8.69171	41.4465	3.33789	55.174	17.0196	49.22		0.209709	0.0604975	0.345786
Cre06.g293950	23.7049	207.27	13.9395	231.69	26.5392	298.184		0.114367	0.0601644	0.0890028
Cre12.g559750	1.26756	10.7014	0.66278	11.4612	3.18651	17.794		0.118448	0.0578282	0.179078
Cre03.g180750	15.8603	206.833	12.9571	228.616	23.9321	310.762		0.0766817	0.0566763	0.077011
Cre05.g248150	1.46088	12.3023	0.752069	13.4206	4.23124	15.287		0.118749	0.0560384	0.276787
Cre17.g711150	1.33906	20.5485	1.14099	21.2167	3.24735	23.5885		0.0651658	0.0537779	0.137667
Cre15.g634827	2.62705	21.6107	0.878546	16.9337	2.65345	20.467		0.121562	0.0518815	0.129645
Cre01.g036950	1.91786	29.1807	1.41854	29.8127	2.79491	35.4736		0.0657236	0.0475817	0.0787885
Cre14.g626750	11.1268	61.1455	3.56727	74.9717	23.0246	97.0933		0.181973	0.0475816	0.237139
Cre16.g676421	1.7531	13.62	0.502201	10.9056	1.34296	11.2448		0.128715	0.0460498	0.119429
Cre12.g556250	4.37031	37.6355	1.68628	38.7111	8.43121	45.0337		0.116122	0.0435606	0.18722
Cre03.g144967	2.88584	34.0465	0.910228	32.3809	3.24985	31.6812		0.0847617	0.02811	0.10258
Cre10.g425050	1.29358	19.3286	0.43139	17.3335	0.780237	16.6253		0.0669257	0.0248876	0.0469307
Cre03.g162800	0.0627289	18.6215	0.316033	14.04	0.321416	82.8277		0.00336863	0.0225095	0.00388054
Cre09.g394473	2.36934	99.2453	1.21357	64.2091	3.66715	104.661		0.0238736	0.0189003	0.0350384
Cre04.g223100	59.0019	1395.15	13.6296	775.416	31.3733	1664.65		0.0422907	0.0175771	0.0188468
Cre12.g555700	0.0694095	22.665	0.116577	9.67979	0.26946	32.6809		0.00306241	0.0120433	0.00824518
Cre12.g546600	0.402425	100.398	0.497683	72.733	2.38594	261.132		0.0040083	0.0068426	0.00913691
Cre06.g309000	0.259483	107.846	0.0402271	37.3468	0.576491	204.064		0.00240605	0.00107712	0.00282505
