# Supplementary material for: Ni induces the CRR1-dependent regulon revealing overlap and distinction between hypoxia and Cu deficiency responses in Chlamydomonas reinhardtii
Source: Royal Society of Chemistry journal article supplement (doi:10.1039/c6mt00063k), 2016-01-01
Supplement: c6mt00063k3.xlsx [file c6mt00063k3.xlsx]

## Sheet: CRR1 targets
Suplemental Table 3. CRR1 targets
affected by Ni in CRR1 but not in either mutant	affected by Ni in all strains	affected by Ni in CRR1 but not in either mutant if cutoffs changed to 1.5 fold and >5 FPKM
affected by Ni in CRR1 and Dcys but not crr1	not affected by Ni	reduced abundance in crr1 compared to CRR1 in the absence of Ni
affected by Ni in CRR1 and crr1but not Dcys	new CRR1 targets																																	fold changes that meet cut-off of 2.0-fold and 10 FPKM
	identified by correlation to CYC6 (if not in CYC6 cluster, cluster partner listed)														FPKM																			Fold change
original targets from Castruita, 2011		CRR1 targets from re-analysis of Castruita, 2011													Ni							Cu					hypoxia												minus Cu / plus Cu	minus Cu
															crr1		CRR1		CRR1(Δcys)			4532		CRR1	crr1		crr1		CRR1		CRR1(Δcys)			plus Ni / minus Ni			minus Ni					6h hypoxia / 0h hypoxia
			symbol	aliases	location	defline	description	PFAM	CDD	notes	Arabidopsis MBH	Description	yeast MBH	Description	plus	minus	plus	minus	plus	minus		minus	plus	minus	minus		6h	0h	6h	0h	6h	0h		crr1	CRR1	CRR1(Δcys)	CRR1/crr1		4532	CRR1/crr1		crr1	CRR1	CRR1(Δcys)
P	P	Cre16.g651050	CYC6		chromosome_16:1238557-1240109	Cytochrome c6	Cytochrome c6, chloroplast precursor (Cyt c553) (Cyt c552) (PETJ) [PMID: 3036842; PMID: 1714451]	Cytochrome c	Cytochrom_C superfamily; CccA						0	0	250.393	0.154601	6.56624	0.467942		1920.23	0	1279.65	0		0	0.126197	11.1668	0.0909714	19.6949	30.4038		n/a	1619.61	14.0322	n/a		inf.	inf.		n/a	122.751	0.647778
	P	Cre07.g346900			chromosome_7:4987084-4990515					duplication of Cre07.g346850, Cre07.g346950 and Cre12.g507800					1.00273	2.04628	525.06	46.5066	161.037	156.491		980.022	24.5204	1929.22	10.7857		0.770573	4.7029	250.264	57.8019	297.509	320.088		0.490026	11.29	1.02905	22.7274		39.9676	178.868		0.163851	4.32968	0.92946
P	P	Cre10.g434350	CTR2		chromosome_10:2263854-2268812	CTR type copper ion transporter	CTR type copper ion transporter; fits the pattern for TM2 and TM3: MxxxM-X13-GxxxG per Vinzenz Unger. Characterized by Page et al. 2009 [PMID: 19318609].	Ctr copper transporter family	Ctr superfamily						0.395241	0.139424	54.3185	6.39468	10.4259	5.70624		152.732	7.50036	94.887	0.46884		0.203887	0.097205	24.5481	5.61007	4.63159	6.22847		2.83481	8.49433	1.82711	45.865		20.3633	202.387		2.09749	4.37572	0.743616
P	P	Cre11.g467540		GOX7	chromosome_11:132495-137407	(M=18) PF07250 - Glyoxal oxidase N-terminus		Domain of unknown function (DUF1929); Glyoxal oxidase N-terminus	E_set superfamily; Glyoxal_oxid_N		AT3G57620.1	glyoxal oxidase-related protein			0.714253	0.931133	11.8252	2.53431	0.845853	1.53735		25.9029	0.715044	17.9903	0.806872		1.97786	0.571215	23.5209	1.19354	3.27481	0.865669		0.767079	4.66604	0.550202	2.72175		36.2256	22.2963		3.46255	19.7068	3.78298
P	P	Cre10.g434650	CTR3		chromosome_10:2302472-2307474	Copper transport accessory protein	Copper transport related; high similarity to CTR type copper ion transporter CTR2 (q.v.), of which it is a close neighbour in the genome (33.5 kb away); has the motif MxxxM-X13-GxxxG per Vinzenz Unger, but appears to lack TM2 and TM3; appears to have clea								8.41409	9.42648	136.601	32.4384	28.9761	27.0198		172.327	14.8023	216.239	6.97281		7.5125	14.0051	59.0755	26.8649	17.3328	39.7766		0.892601	4.21109	1.0724	3.4412		11.6419	31.0117		0.536412	2.19898	0.435754
	P	Cre17.g734644			chromosome_17:4959481-4967303	(M=1) 1.14.99.7 - Transferred entry: 1.14.13.132.		FAD dependent oxidoreductase; Squalene epoxidase	SDR superfamily		AT1G58440.1	FAD/NAD(P)-binding oxidoreductase family protein	YGR175C	ERGosterol biosynthesis	18.2918	18.0444	85.8119	22.3809	29.5877	20.8421		166.64	25.4192	73.543	17.598		12.7798	17.0011	47.153	17.3779	15.9106	18.3768		1.01371	3.83416	1.41961	1.24032		6.55567	4.17905		0.751704	2.71339	0.865798
P	P	Cre12.g512400			chromosome_12:1757518-1764516	(M=1) PTHR10919:SF248 - PREDICTED PROTEIN (FRAGMENT)		Sigma-54 interaction domain	ABC_ATPase superfamily; Fer4_5 superfamily; NapH; PspF	similarity to FesM from Synechococcus sp. PCC 7002; domains: transcriptional regulator-like containing Sigma-54 interaction domain and two 4Fe-4S binding domains found in polyferredoxin					12.0563	13.476	60.088	15.8759	18.7466	12.0723		51.7404	13.1751	48.5666	13.8534		9.3064	11.5301	28.4023	10.3505	11.355	9.7952		0.89465	3.78486	1.55286	1.17809		3.92714	3.50575		0.80714	2.74405	1.15924
	Cre05.g236039	Cre09.g393100			chromosome_9:2185960-2191671					Chlamydomonas / Volvox specific					3.8218	3.4659	13.676	5.42821	10.0578	9.29606		12.5546	1.26058	33.9687	5.26567		3.46662	4.05362	17.5411	6.57505	9.43512	5.62113		1.10269	2.51943	1.08194	1.56618		9.95938	6.45097		0.855191	2.66783	1.67851
	P	Cre03.g203569			chromosome_3:8630708-8634420					Chlamydomonas / Volvox specific					4.27834	2.86093	34.4398	4.27574	8.57512	4.65302		42.5742	0.783881	18.3876	0.236966		1.69798	1.93422	19.6503	2.17593	10.6125	2.80016		1.49544	8.0547	1.84291	1.49453		54.3121	77.5959		0.877863	9.03076	3.78996
P	Cre09.g393100	Cre05.g236039			chromosome_5:2551493-2555425					some similarity to a Phytophthora protein					13.5584	13.2707	241.99	48.8682	195.686	112.744		552.432	3.50132	461.979	19.0068		23.9379	16.88	161.671	31.0793	173.741	65.9646		1.02168	4.95189	1.73567	3.68241		157.778	24.306		1.41812	5.20189	2.63385
P	P	Cre12.g507800			chromosome_12:2289632-2292864					duplication of Cre07.g346850, Cre07.g346900 and Cre07.g346950					2.44249	1.74641	139.072	28.5857	71.2571	41.2396		154.379	32.9779	107.066	6.64307		1.11681	2.37611	59.4646	14.8799	95.9386	25.4807		1.39858	4.86509	1.72788	16.3683		4.68129	16.1169		0.470016	3.9963	3.76515
P	ERG3	Cre12.g490500	CGL78		chromosome_12:1110734-1112794	Predicted protein	Conserved expressed protein of unknown function	Protein of unknown function (DUF2488)	Ycf54 superfamily		AT5G58250.1				102.985	66.5918	535.061	112.884	473.503	291.437		925.97	126.319	541.872	69.7177		55.6398	121.708	275.861	126.459	1743.85	188.766		1.54651	4.73992	1.62472	1.69516		7.33041	7.77237		0.457158	2.18143	9.23816
P	P	Cre02.g085450		CPX1	chromosome_2:1646978-1650920	Coproporphyrinogen III oxidase	Coproporphyrinogen III oxidase, chloroplast precursor; GI:837299; CPO1; HEM13; HEM6 [PMID: 15849308]; Predicted chloroplast transit peptide 1-31	Coproporphyrinogen III oxidase	PLN02873; Coprogen_oxidas superfamily		AT1G03475.1	Coproporphyrinogen III oxidase	YDR044W	HEMe biosynthesis	114.242	84.5073	487.537	106.586	323.321	178.07		2408.92	142.729	776.067	129.348		42.3877	105.37	204.036	96.584	610.928	113.874		1.35186	4.57412	1.8157	1.26126		16.8776	5.99984		0.402275	2.11252	5.36495
P	P	Cre07.g346050	CRD1	CHL27A	chromosome_7:4866865-4871395	Copper response defect 1 protein	Copper response defect 1 protein, chloroplast precursor; Produced under copper and/or oxygen deficient conditions [GI:7542488; PMID: 11910013; PMID: 10811605; PMID: 11910013; PMID: 14673103]; also named CHL27A; Mg-protoporphyrin IX monomethyl ester (oxida	Rubrerythrin	ACSF; Ferritin_like superfamily						64.0523	47.6587	583.555	141.782	286.092	153.932		1480.96	120.831	827.143	63.3417		25.6083	36.6253	257.852	44.7692	405.511	53.626		1.34398	4.11586	1.85856	2.97494		12.2565	13.0584		0.699197	5.75958	7.56184
P	P	Cre17.g701700	FAB2		chromosome_17:781799-786028	Plastid acyl-ACP desaturase	Plastidic ACP-like delta-9 stearate desaturase. Previously annotated as FAB2	Fatty acid desaturase	Acyl_ACP_Desat; Ferritin_like superfamily		AT2G43710.2	Plant stearoyl-acyl-carrier-protein desaturase family protein			155.524	130.753	466.143	140.089	262.247	144.828		765.799	179.609	528.037	121.601		124.709	113.818	282.46	97.8266	235.841	108.943		1.18945	3.32748	1.81075	1.0714		4.2637	4.34237		1.09569	2.88735	2.16481
P	P	Cre13.g570600	CTR1		chromosome_13:1254125-1259806	CTR type copper ion transporter	CTR type copper ion transporter. Characterized by Page et al. 2009 [PMID: 19318609].	Ctr copper transporter family	Ctr superfamily				YPR124W	Copper TRansport	4.5374	4.23667	51.733	19.1772	24.5136	15.3025		42.2321	12.8469	51.2155	5.03142		4.22747	3.27451	31.7607	8.23534	34.3936	8.85237		1.07098	2.69763	1.60193	4.52648		3.28734	10.1791		1.29102	3.85663	3.88524
P	P	Cre16.g657200			chromosome_16:2053507-2057940	(M=18) PF07250 - Glyoxal oxidase N-terminus		Domain of unknown function (DUF1929); Glyoxal oxidase N-terminus	E_set superfamily; Glyoxal_oxid_N						10.6397	16.8984	179.281	20.4591	37.5361	41.1454		260.999	4.75889	225.005	7.15083		147.486	35.169	280.65	25.8183	111.463	28.8646		0.629628	8.7629	0.912279	1.21071		54.8445	31.4656		4.19364	10.8702	3.86158
P	P	Cre02.g084400		PHX4	chromosome_2:1523090-1526578	(M=11) 1.14.11.2 - Procollagen-proline dioxygenase.		2OG-Fe(II) oxygenase superfamily	P4Hc; 2OG-FeII_Oxy superfamily; ShK superfamily						2.43454	4.56278	95.4651	12.3384	8.49301	4.04026		91.035	1.41633	85.0024	6.32683		4.05639	1.85805	90.8445	1.91344	17.279	0.921972		0.533565	7.73723	2.10209	2.70414		64.2753	13.4352		2.18314	47.4771	18.7414
		Cre14.g609500			chromosome_14:267421-272847	(M=15) PF04720 - Protein of unknown function (DUF506)		Protein of unknown function (DUF506)	DUF506 superfamily	PD-(D/E)XK nuclease family PMID: 17584917					7.19031	4.77368	12.4709	3.87016	34.8442	24.0279		12.8222	5.56345	50.6717	13.315		14.0317	2.96321	12.0214	3.17568	106.668	16.5113		1.50624	3.22232	1.45016	0.810729		2.30472	3.80561		4.7353	3.78546	6.4603
P	Cre10.g443050	Cre16.g657250		GOX17	chromosome_16:2058819-2063195	Glyoxal or galactose oxidase	The substrate of this oxidase is unsure, as the similarity is to both glyoxal oxidases and galactose oxidases, found in fungi, bacteria, animals and plants (both use the same Tyr radical / metal mechanism); the plant homologues are secreted, but the fate	Domain of unknown function (DUF1929); Glyoxal oxidase N-terminus	E_set superfamily; Glyoxal_oxid_N						14.4214	30.573	86.5449	32.9729	116.751	60.7832		61.9075	3.93722	146.548	6.3663		143.074	22.6881	288.795	16.854	345.183	16.9492		0.471704	2.62473	1.92078	1.0785		15.7237	23.0193		6.30613	17.1351	20.3657
		Cre03.g199800	HYDA1		chromosome_3:8216107-8220752	Iron hydrogenase	Chloroplast Fe-hydrogenase (= HYDA1); corresponds to GI:18026272	Iron hydrogenase small subunit; Iron only hydrogenase large subunit, C-terminal domain	Fe_hyd_lg_C superfamily; Fe_hyd_SSU superfamily						153.844	188.715	466.065	184.505	377.094	234.883		188.732	45.7746	582.628	144.244		184.291	44.84	342.498	52.5118	874.298	100.967		0.815219	2.52603	1.60545	0.977691		4.12307	4.03918		4.10997	6.52231	8.65925
P	P	Cre16.g675100	CPLD53		chromosome_16:6218171-6224525	(M=8) PF06203 - CCT motif		CCT motif	CCT superfamily	putative nuclear localisation signal					4.77384	4.76103	17.994	8.82159	5.4239	3.13295		26.2182	7.04478	14.1225	4.81623		18.916	3.01017	27.2658	3.58202	15.2903	2.50205		1.00269	2.03977	1.73124	1.85287		3.72165	2.93227		6.28403	7.61185	6.11111
P		Cre17.g723500			chromosome_17:3346461-3359038	(M=7) PTHR19241:SF10 - ATP-BINDING CASSETTE TRANSPORTER (PDR)		ABC-2 type transporter; Plant PDR ABC transporter associated; ABC transporter							7.57789	11.2595	17.5515	8.86763	8.24723	9.66517		19.4421	3.1876	35.1947	6.49399		6.61876	11.0495	11.3821	9.32027	7.42262	10.1529		0.673022	1.97928	0.853294	0.787569		6.09929	5.41958		0.59901	1.22122	0.731084
P	P	Cre03.g200350		SMM12	chromosome_3:8167055-8173016	(M=2) PTHR10108//PTHR10108:SF275 - METHYLTRANSFERASE // SUBFAMILY NOT NAMED		Methyltransferase domain	AdoMet_MTases superfamily; PLPDE_III superfamily	contains methyltransferase domain; similar to CMV 1a interacting protein 1 from Nicotiana tabacum					22.2934	18.9406	51.3479	22.3651	26.1044	23.3264		73.346	20.4916	50.357	23.8539		6.39577	18.5589	11.5024	19.8971	11.6869	20.6206		1.17702	2.29589	1.11909	1.1808		3.57932	2.11106		0.34462	0.578094	0.566758
P		Cre16.g649300			chromosome_16:1032345-1036382										16.358	17.9401	45.7151	21.436	20.5274	18.8678		27.1542	11.4362	48.0058	15.5613		16.6741	19.6921	26.0521	19.7221	16.6981	15.1394		0.911812	2.13263	1.08796	1.19487		2.37441	3.08495		0.846741	1.32096	1.10296
P	P	Cre11.g467527			chromosome_11:40145-45687	Cytochrome P450, CYP710 superfamily; C-22 desaturase	Cytochrome P450, CYP710 superfamily, CYP710A family. Cytochrome P450 CYP710A encodes the sterol C-22 desaturase in Arabidopsis and tomato [PMID: 16531502]. CYP61 of fungi also encodes a C-22 desaturase, and these sequences probably share a common ancesto	Cytochrome P450	CypX;p450 superfamily		AT2G28860.1	cytochrome P450, family 710, subfamily A, polypeptide 4	YMR015C	ERGosterol biosynthesis	41.6261	33.1073	146.579	40.614	56.8838	39.4246		112.797	32.9159	119.373	31.7622		13.8886	35.8125	31.1712	30.2939	18.0845	38.0256		1.25731	3.60908	1.44285	1.22674		3.42682	3.75834		0.387814	1.02896	0.475587
	P	Cre06.g269300	CGL120		chromosome_6:2550824-2555260	(M=1) PF07103 - Protein of unknown function (DUF1365)		Protein of unknown function (DUF1365)	DUF1365 superfamily		AT1G30130.2				4.78491	4.24692	11.0314	5.26915	5.59595	3.98218		23.2354	8.11201	13.9362	4.20758		3.35714	3.87813	9.21713	4.40397	3.12785	4.46607		1.12668	2.09358	1.40525	1.2407		2.86432	3.31217		0.865659	2.09291	0.700358
P	P	Cre09.g389250		AOF1	chromosome_9:2753400-2757653	Amine oxidase, flavin-containing	Amine oxidase, flavin-containing; amine oxidase:FAD dependent oxidoreductase. Possible polyamine oxidase	Flavin containing amine oxidoreductase	NAD_binding_8; SDR superfamily; Amino_oxidase						10.8492	11.1145	34.5062	15.5155	12.8991	16.0779		123.522	32.0388	32.0148	11.4631		16.4395	15.7784	36.3895	18.9236	27.2109	16.5679		0.97613	2.22398	0.802288	1.39597		3.85539	2.79286		1.0419	1.92297	1.64239
P	P	Cre05.g234100	CYP745A1	CYP17	chromosome_5:204045-209162	Cytochrome P450, CYP197 superfamily	Cytochrome P450, CYP197 superfamily. Previously annotated as CYP745A1	Cytochrome P450	p450 superfamily						17.8734	14.0545	59.8436	23.3866	19.8795	18.4451		136.937	26.6596	50.8932	17.2601		7.00791	12.7167	11.1373	13.8503	7.80796	16.7543		1.27172	2.55888	1.07777	1.66399		5.1365	2.9486		0.551079	0.80412	0.466027
P		Cre12.g530350		IRT2	chromosome_12:5438305-5442687	Iron-nutrition responsive ZIP family transporter	Related to bacterial zupT homologs; physically linked to IRT1; (CrZIP10); PMID: 15710683; PMID: 16766055	ZIP Zinc transporter	Zip superfamily						4.64413	1.75884	26.6603	6.73409	3.89619	2.90474		19.5121	1.06747	70.0713	8.82088		0.202732	0.40768	4.10868	0.445202	1.21729	0.958568		2.64045	3.95901	1.34132	3.82871		18.2788	7.9438		0.497282	9.2288	1.2699
	P	Cre07.g346850			chromosome_7:4980659-4983645					duplication of Cre07.g346900, Cre07.g346950 and Cre12.g507800					3.35317	3.6273	174.589	10.2877	6.83271	5.43622		362.272	4.99537	404.327	4.29333		1.20197	2.63003	16.7647	11.2695	7.0391	5.11556		0.924426	16.9707	1.25689	2.83619		72.5216	94.1756		0.457018	1.48762	1.37602
P	P	Cre07.g346950			chromosome_7:4996499-5000945					duplication of Cre07.g346850, Cre07.g346900 and Cre12.g507800					4.17251	3.01649	633.059	109.165	194.198	201.739		331.109	19.6915	935.236	1.91876		0.190789	3.45296	69.5632	93.3159	58.6836	314.082		1.38323	5.7991	0.96262	36.1894		16.8148	487.417		0.0552538	0.745459	0.186842
	P	Cre04.g217907	FAP79		chromosome_4:315620-323342					Chlamydomonas / Volvox specific					8.76933	7.84184	15.4028	7.63567	10.6577	8.82045		30.0701	13.3277	18.3071	6.72519		8.86167	6.86432	11.5028	6.51772	8.41232	9.63977		1.11827	2.01722	1.20829	0.973709		2.25621	2.72217		1.29098	1.76485	0.872668
P	P	Cre06.g306000		GOX3	chromosome_6:8247467-8254313	Glyoxal or galactose oxidase	The substrate of this oxidase is unsure, as the similarity is to both glyoxal oxidases and galactose oxidases, found in fungi, bacteria, animals and plants (both use the same Tyr radical / metal mechanism); the plant homologues are secreted, but the fate	Domain of unknown function (DUF1929); Glyoxal oxidase N-terminus	E_set superfamily; Glyoxal_oxid_N						4.72717	3.75385	10.1311	4.02931	5.78222	6.82381		24.9558	8.92605	14.2134	7.27028		13.6557	8.24359	18.2277	10.0367	13.0811	9.18659		1.25929	2.51435	0.847359	1.07338		2.79584	1.955		1.65652	1.8161	1.42393
P	P	Cre03.g183850	FDX6		chromosome_3:5317758-5320038	Apoferredoxin	Fe2S2 containing redox protein, predicted chloroplast localization [PMID: 19586916]	2Fe-2S iron-sulfur cluster binding domain	fer2 superfamily		AT1G32550.1	2Fe-2S ferredoxin-like superfamily protein			57.9444	40.0837	121.344	51.7377	66.5964	60.1114		142.231	59.1263	203.926	74.4771		28.7728	49.7702	49.5851	44.0533	50.5737	48.8943		1.44559	2.34537	1.10788	1.29074		2.40555	2.7381		0.578113	1.12557	1.03435
P	P	Cre02.g092350	CYP51G1	CYP6	chromosome_2:2518334-2523186	Cytochrome P450, CYP51 superfamily; sterol 14 desaturase	Cytochrome P450, CYP51 superfamily, CYP51G family. Similar to CYP51A (ABC59074), possible sterol 14-demethylase involved in sterol/ergosterol biosynthesis. CYP51G1 is the P450 nomenclature for sterol 14 alpha demethylases of green plants. ERG11 is a name	Cytochrome P450	p450 superfamily		AT1G11680.1	CYTOCHROME P450 51G1	YHR007C	ERGosterol biosynthesis	33.7128	27.8208	149.001	48.7466	78.508	44.3321		207.383	44.9409	73.3778	27.3077		15.7706	32.2561	32.7974	28.3274	40.1424	37.8246		1.21178	3.05664	1.77091	1.75216		4.61457	2.68707		0.488918	1.1578	1.06128
	P	Cre01.g029700			chromosome_1:4388402-4390175										37.2014	27.0025	899.069	24.3287	153.59	59.9685		967.634	3.40454	1570.56	29.6352		57.3918	20.6108	252.091	33.0859	114.629	135.64		1.3777	36.9551	2.56118	0.90098		284.219	52.9964		2.78455	7.61929	0.845097
P	PHX5	Cre08.g372200			chromosome_8:2529267-2530757										164.171	356.736	2137.65	434.022	782.755	363.888		1173.78	17.6849	1840.74	88.9204		145.936	41.9201	2392.09	52.8475	2975.99	49.1382		0.460203	4.92521	2.15109	1.21665		66.3719	20.701		3.48129	45.264	60.5637
P		Cre17.g730100	RSEP1	RSE1	chromosome_17:4189344-4194305	Intramembrane metalloprotease	Intramembrane metalloprotease related to site-2 protease; contains M50 domain, with HExxH motif embedded in transmembrane helix; homologous to bacterial RseP/YaeL/PsoIVFB involved in transmembrane signaling; could be organelle-targeted, based on presence	Peptidase family M50	S2P-M50 superfamily; Peptidase_M50						11.2231	15.6205	23.5385	9.24503	9.97919	4.53927		39.3607	1.16087	29.6359	5.27094		8.88132	1.50555	36.9802	1.31779	23.4011	1.03527		0.718485	2.54607	2.19841	0.591852		33.9062	5.62251		5.89905	28.0623	22.6039
P	Cre08.g372200	Cre02.g084450		PHX5	chromosome_2:1526630-1530141	(M=11) 1.14.11.2 - Procollagen-proline dioxygenase.		2OG-Fe(II) oxygenase superfamily	P4Hc; 2OG-FeII_Oxy superfamily; ShK superfamily						25.1734	46.4992	203.458	52.8132	72.6728	37.0802		74.6546	2.38507	137.192	12.0704		21.7476	29.5182	101.033	29.8159	53.9567	25.7786		0.541373	3.85241	1.95988	1.13579		31.3008	11.366		0.736752	3.38856	2.09308
P	P	Cre17.g700950	FDX5		chromosome_17:704736-706717	Apoferredoxin	Fe2S2 containing redox protein, predicted chloroplast localization	2Fe-2S iron-sulfur cluster binding domain	fer2 superfamily						0.794127	0.312582	1599.1	6.23193	22.6241	2.72106		2735.51	13.9841	1732.8	0.782322		0.0975424	0.450677	1118.51	1.47278	27.413	1.19007		2.54054	256.598	8.31444	19.9369		195.616	2214.94		0.216435	759.455	23.0348
P	P	Cre03.g179500		PHX8	chromosome_3:4894433-4898365	(M=19) PTHR10869 - PROLYL 4-HYDROXYLASE ALPHA SUBUNIT		2OG-Fe(II) oxygenase superfamily	P4Hc; 2OG-FeII_Oxy superfamily						5.30399	3.35434	79.0857	8.42486	15.5045	3.65479		65.1409	0.838409	36.8869	0.557579		1.57487	0.800938	33.1475	2.11153	30.7858	2.22979		1.58123	9.38718	4.24224	2.51163		77.6959	66.1555		1.96628	15.6983	13.8066
P		Cre03.g146447			chromosome_3:823537-827213	(M=2) PTHR23244:SF16 - JASMONATE INDUCIBLE PROTEIN-RELATED		Kelch motif	Kelch_4; Kelch_3 superfamily; PLN02153		AT3G07720.1	Galactose oxidase/kelch repeat superfamily protein			41.2359	16.8219	81.4577	30.2762	15.5847	8.64475		35.3089	7.78849	240.518	48.0182		2.38901	11.78	13.0652	11.1039	3.33875	9.56476		2.45132	2.69049	1.80279	1.79981		4.53347	5.00889		0.202802	1.17663	0.349068
		Cre07.g336800			chromosome_7:3611515-3613640										83.8837	11.2047	184.376	57.4009	36.8766	32.4614		48.3849	11.1921	837.162	254.508		2.17728	2.39519	1.84911	2.18244	12.5181	17.2761		7.48647	3.21208	1.13601	5.12293		4.32313	3.28933		0.909022	0.847267	0.724591
P	CGL78	Cre16.g663950		ERG3	chromosome_16:2920032-2922957	(M=1) 1.14.21.6 - Lathosterol oxidase.		Fatty acid hydroxylase superfamily	FA_hydroxylase superfamily; ERG3		AT3G02580.1	sterol 1	YLR056W	ERGosterol biosynthesis	40.3106	20.0955	155.303	37.0712	139.065	60.757		162.868	39.8167	72.7268	28.4559		29.2883	38.4403	84.4116	36.809	179.395	69.7808		2.00595	4.18932	2.28887	1.84475		4.09044	2.55577		0.761917	2.29323	2.57084
P		Cre16.g652000			chromosome_16:1377011-1380376										158.385	184.984	169.613	99.8451	95.3173	70.8604		73.9821	24.5639	77.9456	13.7313		229.207	70.7348	248.431	64.7158	208.35	56.4121		0.856209	1.69876	1.34514	0.53975		3.01182	5.67649		3.24037	3.8388	3.69336
		Cre05.g244000			chromosome_5:1451363-1457757	(M=10) PF07173 - Protein of unknown function (DUF1399)		Protein of unknown function (DUF1399)	DUF1399 superfamily		AT1G56230.2	Protein of unknown function (DUF1399)			3.45213	3.50478	5.72339	2.48714	2.59097	2.74653		15.837	0.451125	9.77476	1.45164		8.44512	1.46634	15.7857	2.62338	7.69398	1.73582		0.984978	2.30119	0.943361	0.709642		35.1056	6.7336		5.75932	6.01731	4.43248
P	P	Cre06.g304600			chromosome_6:8083769-8088679	(M=2) PTHR18838 - RHODANESE-LIKE DOMAIN-CONTAINING		Rhodanese-like domain	RHOD superfamily		AT1G17850.2	Rhodanese/Cell cycle control phosphatase superfamily protein			12.7431	14.0321	25.4689	13.1455	16.224	15.5493		87.2028	20.7023	27.948	12.8533		14.7137	14.4073	27.9167	16.2534	21.1355	13.9646		0.908139	1.93746	1.04339	0.936816		4.21223	2.17438		1.02127	1.71759	1.51351
P	P	Cre09.g397250		FAD5A	chromosome_9:1623841-1629056	Delta-9 desaturase	Delta-9 desaturase, possible stearoyl-CoA 9-desaturase. Previously annotated as FAD5A	Fatty acid desaturase	Membrane-FADS-like superfamily		AT3G15850.1	fatty acid desaturase 5	YGL055W	Delta(9) fatty acid desaturase;	78.088	70.5353	127.244	70.8436	107.038	92.7468		293.501	119.854	209.078	96.2553		67.4435	91.0739	112.946	76.2726	81.31	85.85		1.10708	1.79613	1.15409	1.00437		2.44882	2.17212		0.740536	1.48082	0.947117
	P	Cre09.g408464			chromosome_9:6602927-6611533	(M=1) PTHR12117 - HISTONE ACETYLTRANSFERASE COMPLEX		Oxoglutarate and iron-dependent oxygenase degradation C-term	2OG-FeII_Oxy superfamily						12.3555	16.2464	32.0414	17.7198	10.8897	13.9943		55.0723	20.3555	28.8313	10.856		12.1077	15.3332	25.4779	16.8352	13.0068	14.2236		0.760507	1.80823	0.778153	1.09069		2.70552	2.65579		0.789639	1.51337	0.914452
P		Cre12.g547300			chromosome_12:8586056-8593637	(M=1) PTHR19241:SF28 - ABC TRANSPORTER (PLANT)		ABC-2 type transporter	P-loop_NTPase superfamily; ABC2_membrane superfamily		AT2G01320.3	ABC-2 type transporter family protein	YOL075C	Putative ABC transporter	21.0574	19.8273	40.9478	21.7677	24.8374	18.9754		39.4387	7.25597	66.2927	32.3722		15.443	15.977	16.4149	14.4109	20.9944	17.4149		1.06204	1.88113	1.30893	1.09787		5.43534	2.04783		0.966577	1.13906	1.20554
	P	Cre17.g735350	FAP164		chromosome_17:5142509-5148365	Flagellar Associated Protein	Flagellar Associated Protein, found in the flagellar proteome [PMID: 15998802]. Possible phospholipase A2 or serine endopeptidase activity	Ankyrin repeat	ANK superfamily						7.89007	6.27852	11.7715	7.08	9.37484	8.33872		28.7707	12.038	27.3088	13.5761		8.80241	8.93054	17.24	10.876	12.9838	10.0883		1.25668	1.66264	1.12425	1.12765		2.38999	2.01153		0.985653	1.58514	1.28702
P		Cre06.g281900	ZIP7	CrZIP7, ZIL2	chromosome_6:5203545-5207717	Zinc/iron transporter	Related to plant divalent metal transporters. Appears as CrZIP7 in PMID: 15710683. This accession number is listed as ZIP14 rather than ZIP7 in The Chlamydomonas Sourcebook, volume 2, p. 337. Previously annotated as ZIL2	ZIP Zinc transporter	Zip superfamily		AT3G08650.1	ZIP metal ion transporter family			10.5561	9.17032	19.2717	10.3835	11.6471	9.18503		23.2063	9.48675	40.8804	17.883		6.57725	7.64593	9.99898	7.10008	8.18841	8.17695		1.15112	1.85599	1.26805	1.13229		2.44618	2.28599		0.860229	1.40829	1.0014
P	GOX17	Cre10.g443050		PHX15	chromosome_10:3253452-3256956	(M=11) 1.14.11.2 - Procollagen-proline dioxygenase.		2OG-Fe(II) oxygenase superfamily	2OG-FeII_Oxy superfamily						74.8889	115.922	483.42	250.112	566.215	397.612		187.615	27.6249	302.693	39.0135		26.7938	29.5429	291.947	55.7282	1288.62	164.154		0.646028	1.93281	1.42404	2.15759		6.79152	7.75867		0.906945	5.23877	7.85007
		Cre16.g695100			chromosome_16:165889-174125	(M=1) PTHR10909//PTHR10909:SF129 - ELECTRON TRANSPORT OXIDOREDUCTASE // SUBFAMILY NOT NAMED		Acyl-CoA dehydrogenase, C-terminal domain	ACAD superfamily; Acyl-CoA_dh_N superfamily		AT3G51840.1	acyl-CoA oxidase 4			44.9661	53.2963	52.9817	36.9048	37.2591	26.8281		90.9608	40.675	65.3271	32.2213		20.7396	19.4595	23.535	17.3777	16.2382	16.3745		0.8437	1.43563	1.38881	0.692446		2.23628	2.02745		1.06578	1.35432	0.991676
		Cre07.g331250			chromosome_7:2732408-2745463	(M=1) KOG2244 - Highly conserved protein containing a thioredoxin domain		Protein of unknown function, DUF255	Thioredoxin_like superfamily		AT4G03200.2				8.90384	9.56281	10.5889	7.42453	7.10157	6.27278		24.459	10.6138	15.1171	7.71327		8.05721	4.80913	13.2452	4.55581	5.83976	4.99141		0.93109	1.4262	1.13212	0.776396		2.30445	1.95988		1.6754	2.90732	1.16996
P		Cre01.g004700			chromosome_1:887957-891436	(M=7) PF03188 - Eukaryotic cytochrome b561		Eukaryotic cytochrome b561	Cyt_b561 superfamily						12.7835	12.67	12.1467	10.0429	8.16166	8.81094		20.7061	7.22677	21.6198	9.17223		4.88274	11.6355	7.96158	12.9075	8.51365	9.17727		1.00896	1.20948	0.92631	0.792652		2.86519	2.35709		0.419642	0.616818	0.927689
		Cre10.g429350			chromosome_10:1584785-1589411	(M=5) PF05721 - Phytanoyl-CoA dioxygenase (PhyH)		Phytanoyl-CoA dioxygenase (PhyH)	2OG-FeII_Oxy superfamily						7.62101	11.0811	10.6536	9.91566	6.76996	8.36825		18.9047	9.37232	13.2068	4.22072		5.58785	7.89275	12.5222	11.7315	5.91108	8.29576		0.687749	1.07442	0.809005	0.894826		2.01708	3.12904		0.707973	1.0674	0.712542
P		Cre09.g398993		HPD1	chromosome_9:5146345-5150707	4-hydroxyphenylpyruvate dioxygenase	4-hydroxyphenylpyruvate dioxygenase (EC 1.13.11.27); (4HPPD) (HPD) (HPPDase)	Glyoxalase/Bleomycin resistance protein/Dioxygenase superfamily	Glo_EDI_BRP_like superfamily						4.47944	4.32226	7.27503	5.25373	5.9484	4.39854		64.4995	1.41735	15.4588	6.92523		1.06199	3.18305	5.06164	3.75416	3.78401	4.26828		1.03637	1.38474	1.35236	1.21551		45.5071	2.23224		0.333639	1.34827	0.886542
P		Cre01.g029650		VPS35	chromosome_1:4378844-4387792	Subunit of Retromer complex	Expressed Protein. Similar to VPS35, a component of the Retromer Coat complex involved in endosomal to Golgi trafficking; may still need editing at 3' end due to sequence gap.	Vacuolar protein sorting-associated protein 35	Vps35 superfamily		AT1G75850.1	VPS35 homolog B	YJL154C	Vacuolar Protein Sorting	17.6255	15.301	23.7443	19.4057	20.0959	14.2318		36.277	17.5753	53.2803	26.2292		10.7228	14.0171	13.4306	15.4731	8.09977	13.2495		1.15192	1.22357	1.41204	1.26826		2.06409	2.03134		0.76498	0.867997	0.611326
		Cre16.g656750			chromosome_16:1996284-2002953	(M=12) PF03031 - NLI interacting factor-like phosphatase		NLI interacting factor-like phosphatase	HAD_like superfamily						12.3624	13.024	19.9681	18.3229	20.4504	19.1756		19.7277	5.05687	38.9871	5.33018		11.9084	18.5262	18.26	19.8488	10.0567	19.079		0.949201	1.08979	1.06648	1.40686		3.90117	7.31441		0.642787	0.919955	0.527108
P		Cre01.g000150	ZRT2		chromosome_1:41895-46547	Zinc-nutrition responsive permease transporter	Zinc/iron permease; related to plant homologs; ZIP family, subfamily I; appears as CrZIP2 in PMID: 15710683; PMID: 16766055	ZIP Zinc transporter	Zip superfamily						2.65151	2.07417	7.23713	7.67893	90.2552	118.468		36.428	11.2365	54.4967	0.546165		0.138797	4.80313	6.21028	11.725	132.227	151.646		1.27835	0.942466	0.761853	3.70217		3.24193	99.7807		n/a	0.529661	0.871945
P		Cre12.g510050	CTH1	CTH1B	chromosome_12:2024725-2027967	Copper target 1 protein	Copper target homolog 1 protein, chloroplast precursor, functional variant produced under copper and/or oxygen sufficient conditions [GI:15650866; PMID: 11910013; PMID: 14673103]; also named CHL27B; Mg-protoporphyrin IX monomethyl ester (oxidative) cyclas	Rubrerythrin	Ferritin_like superfamily		AT3G56940.1	dicarboxylate diiron protein, putative (Crd1)			233.554	207.867	69.9447	137.345	250.54	233.972		55.8861	265.919	68.3792	373.709		97.2118	293.457	50.2492	226.521	107.288	259.152		1.12357	0.509263	1.07081	0.660735		0.210162	0.182974		0.331264	0.22183	0.413996
P		Cre12.g537000			chromosome_12:6256569-6259730	(M=6) PF07883 - Cupin domain		Cupin domain	cupin_like superfamily		AT4G02980.1	endoplasmic reticulum auxin binding protein 1			35.2035	47.1524	20.6402	31.116	17.2412	24.3192		53.5821	111.613	22.9191	96.1216		26.4957	19.7139	12.5495	19.3612	37.3251	20.2397		0.74659	0.663331	0.708954	0.659903		0.48007	0.238439		1.34401	0.648178	1.84415
P		Cre01.g045200			chromosome_1:6335452-6338184	(M=1) PF06351 - Allene oxide cyclase		Allene oxide cyclase	Allene_ox_cyc superfamily		AT3G25760.1	allene oxide cyclase 1			10.2765	9.4973	1.29277	3.46113	62.9363	37.6226		6.2052	30.4345	1.89712	16.4687		292.314	37.9155	144.086	63.5929	285.715	46.33		1.08204	0.373511	1.67283	0.364433		0.203887	0.115195		7.70962	2.26576	6.16695
