# Supplementary material for: Ni induces the CRR1-dependent regulon revealing overlap and distinction between hypoxia and Cu deficiency responses in Chlamydomonas reinhardtii
Source: Royal Society of Chemistry journal article supplement (doi:10.1039/c6mt00063k), 2016-01-01
Supplement: c6mt00063k5.xlsx [file c6mt00063k5.xlsx]

## Sheet: up_in_all_strains
Supplemental Table 5. Transcripts whose abundances change at least 2.0 fold with a minimum FPKM of 10 in all three strains.																FPKM										Fold change
										MBH = mutual best hit based on BLAST search						Ni						Cu
																crr1		CRR1		cys		4532		CRR1	crr1	Ni						Cu
classification	gene	symbol	aliases	location	defline	description	PFAM	CDD	notes	Arabidopsis MBH	Description	yeast MBH	Description			plus	minus	plus	minus	plus	minus	minus	plus	minus	minus	crr1	q value	CRR1	q value	cys	q value	4532	CRR1/crr1
protein degradation
	Cre05.g235950			chromosome_5:2529553-2533460						AT3G23420.1	F-box and associated interaction domains-containing protein					4.75166	0.318002	8.56853	0.107733	47.1701	18.3984	5.96315	1.3624	8.17223	139.532	14.9422	0.00307393	79.5349	0.00180338	2.56382	0.00317004	4.37695	0.0585689
	Cre12.g498500	DEG11	DEG1C	chromosome_12:3243768-3247710	DegP-type protease	(HtrA) similar to DegP protease; serine protease, trypsin family, DegP type (HtrA) (protease Do) most similar to At4g18370 (DegP5, localized in thylakoid membrane, lumen side [PMID: 15137941]; probably results from a recent duplication of DEG5 gene; one C	Trypsin	PDZ_serine_protease; Tryp_SPc superfamily		AT3G27925.1	DegP protease 1					41.6544	13.673	142.983	13.2098	157.685	77.2193	42.1337	39.9941	20.617	6.70118	3.04647	0.00307393	10.824	0.000458597	2.04204	0.00317004	1.0535	3.07662
	Cre16.g662450			chromosome_16:2712325-2717089	(M=4) KOG0324 - Uncharacterized conserved protein		PPPDE putative peptidase domain	Peptidase_C97 superfamily								16.1453	0.992458	7.16466	0.747442	40.1929	1.52138	1.30543	1.20324	0.711096	0.657302	16.268	0.00307393	9.58557	0.000458597	26.4187	0.00317004	1.08493	1.08184
	Cre12.g505050			chromosome_12:2605639-2611042	(M=13) PF00646 - F-box domain		F-box domain	F-box superfamily		AT5G41490.1	F-box associated ubiquitination effector family protein					17.2686	6.8533	34.9531	4.64376	40.2127	19.5794	35.1949	37.2147	9.03844	3.93756	2.51975	0.00307393	7.5269	0.000458597	2.05383	0.00317004	0.945726	2.29544
	Cre12.g498000			chromosome_12:3289588-3293845				contains F-box domain based on InterPro		AT2G02340.1	phloem protein 2-B8					4.35138	1.7943	12.3994	2.45515	6.78476	2.75158	1.00954	1.35893	0.529994	0.520328	2.42511	0.00307393	5.05036	0.000458597	2.46577	0.00317004	0.742893	1.01858
	Cre13.g605200		MMP29	chromosome_13:4800765-4806621	(M=48) PF05548 - Gametolysin peptidase M11		Gametolysin peptidase M11	Peptidase_M7 superfamily								26.7001	13.1217	26.4609	6.77082	46.9714	25.4887	16.827	9.88678	19.4412	63.8596	2.0348	0.00307393	3.90808	0.000458597	1.84283	0.0129658	1.70197	0.304437
	Cre15.g641750			chromosome_15:1290462-1295729	(M=3) PF05495 - CHY zinc finger		CHY zinc finger	zf-CHY superfamily				YKL084W	Helper Of Tim			15.9707	9.98337	22.6068	7.45425	21.5593	8.50545	18.0699	19.918	12.6154	3.62945	1.59973	0.0238442	3.03274	0.000458597	2.53476	0.00317004	0.907215	3.47584
	Cre16.g652200		MMP9	chromosome_16:1401331-1408423	Metalloproteinase of VMP family	Belongs to the large VMP-family of metalloproteinases (identified in Volvox); the binding site of the catalytic metal ion in VMPs is QExxHxxGxxH not HExxHxxGxxH, therefore VMPs prefer copper for activity rather than zinc; extracellular matrix glycoprotein	Gametolysin peptidase M11	Peptidase_M7 superfamily								42.0983	19.7155	95.0328	32.0186	120.729	57.4251	3.71839	3.28549	11.6741	1.59573	2.13529	0.00307393	2.96805	0.000458597	2.10237	0.00317004	1.13176	7.31584
	Cre01.g018900			chromosome_1:3058875-3065307	(M=1) PTHR11685//PTHR11685:SF61 - RBR FAMILY (RING FINGER AND IBR DOMAIN-CONTAINING) // SUBFAMILY NOT NAMED		RWD domain; IBR domain	RING superfamily; IBR superfamily; RWD superfamily		AT1G32340.1	NDR1/HIN1-like 8	YML068W				8.31348	5.2979	14.6367	5.26546	15.2501	9.17214	11.3927	10.9191	6.66841	6.11091	1.5692	0.0495065	2.77976	0.000458597	1.66265	0.034456	1.04337	1.09123
	Cre12.g555850			chromosome_12:7525120-7527257	(M=4) KOG0324 - Uncharacterized conserved protein		PPPDE putative peptidase domain	Peptidase_C97 superfamily		AT3G07090.1	PPPDE putative thiol peptidase family protein					12.7392	5.82337	17.8355	6.84543	22.5216	8.86236	9.8811	9.1397	5.60212	9.98675	2.1876	0.00307393	2.60546	0.000458597	2.54126	0.00317004	1.08112	0.560955
	Cre02.g116650			chromosome_2:6517045-6519406	(M=6) PF09409 - PUB domain		PUB domain	PUB superfamily								54.1242	26.3474	75.7819	30.1394	73.2379	42.9265	28.7042	26.9845	20.3976	39.0978	2.05425	0.00307393	2.51438	0.000458597	1.70612	0.037285	1.06373	0.521707
	Cre02.g090850	CLPB3		chromosome_2:2340617-2348785	ClpB chaperone, Hsp100 family	ClpB chaperone, Hsp100 family; probably chloroplastic or mitochondrial, by homology to At5g15450 and At2g25140 (PMID: 17144892)	Clp amino terminal domain; ATPase family associated with various cellular activities (AAA); AAA domain (Cdc48 subfamily); C-terminal, D2-small domain, of ClpB protein	AAA; ABC_ATPase superfamily; ClpB_D2-small superfamily; Clp_N superfamily; chaperone_ClpB		AT5G15450.1	casein lytic proteinase B3	YDR258C	Heat Shock Protein			46.6307	28.7134	64.7208	27.5458	68.4786	29.9859	39.742	35.8192	27.6872	19.1383	1.624	0.00307393	2.34957	0.000458597	2.28369	0.00317004	1.10952	1.44669
	Cre16.g651350			chromosome_16:1264421-1273527				UBQ superfamily		AT4G30790.1						9.77184	6.17223	10.0033	4.51922	14.5759	7.20783	14.6898	11.9106	9.53114	4.70918	1.58319	0.0140123	2.2135	0.000458597	2.02223	0.00317004	1.23334	2.02395
	Cre14.g610950		PBD1	chromosome_14:459161-461761	20S proteasome beta subunit D, type 2	20S proteasome beta subunit D, type 2. Expressed in a transcriptome screen for response to trace levels of cadmium, Simon et al. 2008 [PMID: 1838423]. Previously annotated as PBD1	Proteasome subunit	proteasome_beta_type_2; Ntn_hydrolase superfamily; PRE1		AT4G14800.1	20S proteasome beta subunit D2	YER012W	PRoteinase yscE			127.369	80.4454	188.207	88.3587	165.074	86.5365	90.0336	108.116	105.631	119.051	1.5833	0.0207291	2.13003	0.000458597	1.90757	0.00949967	0.83275	0.887275
	Cre05.g246300			chromosome_5:1042085-1047197	(M=1) PTHR13554 - 26S PROTEASOME NON-ATPASE REGULATORY SUBUNIT 5-RELATED		Proteasome non-ATPase 26S subunit			AT3G15180.2	ARM repeat superfamily protein					9.94333	5.04599	12.2279	6.06093	16.064	6.48752	9.3605	8.53022	5.30508	5.22108	1.97054	0.00307393	2.0175	0.000458597	2.47614	0.00317004	1.09733	1.01609
	Cre06.g269950		CDC48	chromosome_6:2643755-2650925	Protein involved in ubiquitin-dependent degradation of ER-bound substrates	Flagellar Associated Protein with conserved AAA domain ; higher plant homologue is involved in formation of ER in the cell division plane during cytokinesis (PMID: 12427991); CDC48 (p97) functions as an hexameric complex presenting ER-bound substrates eit	Cell division protein 48 (CDC48), N-terminal domain; Cell division protein 48 (CDC48), domain 2; ATPase family associated with various cellular activities (AAA)	Vps4_C superfamily; Thioredoxin_like superfamily		AT3G53230.1	ATPase, AAA-type, CDC48 protein	YDL126C	Cell Division Cycle			166.04	103.091	228.318	114.747	211.469	93.2994	64.0288	65.5719	69.654	95.0672	1.61062	0.036295	1.98975	0.000458597	2.26656	0.00317004	0.976467	0.732682
	Cre10.g424350			chromosome_10:910580-915628	(M=1) KOG1701 - Focal adhesion adaptor protein Paxillin and related LIM proteins		Protein of unknown function (DUF3633); LIM domain	LIM superfamily; DUF3633 superfamily		AT1G19270.1	DA1	YKR090W				5.69852	3.32975	8.49453	4.39706	11.7252	3.84247	2.90419	2.80177	3.9384	2.35902	1.7114	0.0472641	1.93187	0.000458597	3.05147	0.00317004	1.03656	1.66951
	Cre09.g409050		OTU6	chromosome_9:6737874-6742084	(M=2) PTHR13312 - HIV-INDUCED PROTEIN-7-LIKE PROTEASE		OTU-like cysteine protease	OTU superfamily		AT1G50670.1	OTU-like cysteine protease family protein	YFL044C	YOD1			17.3992	9.85269	18.911	10.1168	24.9607	10.202	7.66458	11.3485	6.85094	7.52466	1.76593	0.00307393	1.86927	0.000458597	2.44665	0.00317004	0.675383	0.910465
	Cre06.g281350		LON1	chromosome_6:5142745-5151728	Mitochondrial LON protease	Belongs to MEROPS peptidase family S16 of ATP-dependent proteases; similar to mitochondrial LON protease homolog from Arabidopsis thaliana	ATPase family associated with various cellular activities (AAA); ATP-dependent protease La (LON) domain; Lon protease (S16) C-terminal proteolytic domain	ABC_ATPase superfamily; ChlI superfamily; PORR superfamily; Lon_protease		AT3G05790.1	lon protease 4	YBL022C	ATP-dependent Lon protease PIM1 LON1			17.9583	9.00115	19.0328	10.7263	23.2304	9.19112	15.2012	15.055	20.872	14.2051	1.99511	0.00307393	1.7744	0.000458597	2.52748	0.00317004	1.00971	1.46933
	Cre01.g030850		POA4	chromosome_1:4528372-4531761	20S proteasome alpha subunit D	20S proteasome alpha subunit D (type 7)	Proteasome subunit A N-terminal signature	proteasome_alpha_type_7; Ntn_hydrolase superfamily		AT5G66140.1	proteasome alpha subunit D2	YOL038W	proteasome core particle subunit alpha 4			70.9228	44.1244	95.2832	58.5651	88.1552	45.0084	46.8548	51.0274	46.8127	51.1209	1.60734	0.0156857	1.62696	0.00118176	1.95864	0.00317004	0.918228	0.915725
protein modification
	Cre13.g586450		NAT31	chromosome_13:3310440-3313482	(M=46) PF00583 - Acetyltransferase (GNAT) family		Acetyltransferase (GNAT) family	NAT_SF superfamily; RimI								15.3937	7.77734	50.6126	12.041	26.0421	12.3115	50.789	33.3247	13.1342	14.7447	1.9793	0.00307393	4.20336	0.000458597	2.11527	0.00317004	1.52406	0.890774
	Cre02.g110650			chromosome_2:5765377-5772949	(M=4) PF10250 - GDP-fucose protein O-fucosyltransferase		GDP-fucose protein O-fucosyltransferase	O-FucT_like superfamily; Glyco_tranf_GTA_type superfamily; PA14 superfamily; RfaJ								25.0805	13.358	43.3985	13.3904	30.233	18.2496	11.358	10.6073	13.4972	20.1515	1.87756	0.00307393	3.24102	0.000458597	1.65664	0.041582	1.07077	0.669786
	Cre08.g361600			chromosome_8:913219-917468	(M=4) PF10250 - GDP-fucose protein O-fucosyltransferase		GDP-fucose protein O-fucosyltransferase	O-FucT_like superfamily								20.6381	11.4344	28.0243	9.38089	33.1435	18.3302	6.82706	6.46488	13.134	18.1532	1.80491	0.00307393	2.98738	0.000458597	1.80814	0.00773763	1.05602	0.723509
molecular chaperones
	Cre01.g004900			chromosome_1:912668-915952	(M=4) PTHR11019//PTHR11019:SF30 - THIJ/PFPI		DJ-1/PfpI family	GATase1_Hsp31_like; GAT_1 superfamily; ThiJ								37.431	19.4868	37.5315	7.07587	93.3233	18.0605	53.1691	42.8481	25.5719	80.0368	1.92084	0.00307393	5.30415	0.000458597	5.16726	0.00317004	1.24087	0.319502
	Cre10.g428950			chromosome_10:1515671-1519913	(M=4) PTHR11019//PTHR11019:SF30 - THIJ/PFPI		DJ-1/PfpI family	GATase1_Hsp31_like; GAT_1 superfamily; ThiJ								11.6158	6.62047	10.5641	5.48732	94.0348	15.8501	0.822665	0.643175	4.30998	8.384	1.75453	0.0279521	1.92518	0.000458597	5.93276	0.00317004	1.27907	0.514072
	Cre03.g145787		HSP22C	chromosome_3:640716-642631	Heat shock protein 22C	Small heat shock protein containing an alpha-crystallin domain; N-terminus by TargetP weakly predicted to be chloroplast transit peptide; PMID: 16143837	Hsp20/alpha crystallin family	ACD_sHsps-like; alpha-crystallin-Hsps_p23-like superfamily; IbpA								30.6783	1.95533	41.4045	0.698018	97.7562	11.9844	2.62267	3.17031	1.27608	0.566463	15.6896	0.00307393	59.3172	0.000458597	8.15695	0.00317004	0.82726	2.25272
	Cre14.g617450	HSP22E		chromosome_14:1398587-1400061	Heat shock protein 22E	Small heat shock protein containing an alpha-crystallin domain; N-terminus by TargetP weakly predicted to be chloroplast transit peptide; HSP22E and HSP22F are arranged head-to-head and share 98% identical nucleotide sequence in coding region (96% identic	Hsp20/alpha crystallin family	ACD_sHsps-like; alpha-crystallin-Hsps_p23-like superfamily; IbpA								320.135	38.0884	1049.26	26.9403	981.042	307.706	148.766	181.62	48.4544	11.2226	8.40505	0.00307393	38.9476	0.000458597	3.18824	0.00317004	0.819106	4.31757
	Cre14.g617400	HSP22F		chromosome_14:1396616-1398388	Heat shock protein 22F	Small heat shock protein containing an alpha-crystallin domain; N-terminus by TargetP weakly predicted to be chloroplast transit peptide; HSP22F and HSP22E are arranged head-to-head and share 98% identical nucleotide sequence in coding region (96% identic	Hsp20/alpha crystallin family	ACD_sHsps-like; alpha-crystallin-Hsps_p23-like superfamily; IbpA								216.903	30.7948	442.797	16.4299	495.902	142.204	94.0107	127.079	27.9909	11.4241	7.04349	0.00307393	26.9507	0.000458597	3.48726	0.00317004	0.739782	2.45016
	Cre12.g519350		PHB2	chromosome_12:4260294-4263730	Prohibitin		SPFH domain / Band 7 family	SPFH_prohibitin; SPFH_like superfamily; HflC		AT5G40770.1	prohibitin 3	YGR132C	ProHiBitin			152.734	94.1709	199.909	99.3639	182.09	101.454	45.9741	53.3813	59.8523	72.2676	1.62188	0.00307393	2.01189	0.000458597	1.7948	0.0175038	0.86124	0.828204
redox
	Cre03.g210513			chromosome_3:9042343-9046301	(M=3) 1.3.1.42 - 12-oxophytodienoate reductase.		NADH:flavin oxidoreductase / NADH oxidase family	OYE_like_FMN; TIM_phosphate_binding superfamily; NemA				YPL171C	Old Yellow Enzyme			20.7922	9.87209	27.2255	9.30804	70.2231	20.6418	29.4303	46.3441	21.1161	11.8629	2.10616	0.00307393	2.92494	0.000458597	3.40199	0.00317004	0.635039	1.78001
	Cre17.g731350		SDR28	chromosome_17:4356223-4360253	(M=16) KOG1208 - Dehydrogenases with different specificities (related to short-chain alcohol dehydrogenases)		short chain dehydrogenase	SDR superfamily; FabG		AT5G61830.1	NAD(P)-binding Rossmann-fold superfamily protein					27.9775	16.6104	42.4928	16.6844	88.3582	18.893	18.4286	18.1338	17.9791	23.1747	1.68434	0.00799222	2.54686	0.000458597	4.67677	0.00317004	1.01626	0.775807
	Cre03.g146447			chromosome_3:823537-827213	(M=2) PTHR23244:SF16 - JASMONATE INDUCIBLE PROTEIN-RELATED		Kelch motif	Kelch_4; Kelch_3 superfamily; PLN02153		AT3G07720.1	Galactose oxidase/kelch repeat superfamily protein					41.2359	16.8219	81.4577	30.2762	15.5847	8.64475	35.3089	7.78849	240.518	48.0182	2.45132	0.00307393	2.69049	0.000458597	1.80279	0.014392	4.53347	5.00889
	Cre03.g155350		PPO4	chromosome_3:1927265-1932452	(M=1) PF00175//PF01243 - Oxidoreductase NAD-binding domain // Pyridoxamine 5'-phosphate oxidase		Pyridoxamine 5'-phosphate oxidase; Oxidoreductase NAD-binding domain	PNPOx_like superfamily; FNR_like superfamily								8.88754	3.63651	4.74082	1.69164	41.6422	3.01382	2.35582	2.44396	2.10998	1.32851	2.44398	0.00307393	2.8025	0.000458597	13.8171	0.00317004	0.963936	1.58823
	Cre13.g569400			chromosome_13:1118317-1121021	(M=3) PTHR10696 - GAMMA-BUTYROBETAINE HYDROXYLASE-RELATED		Taurine catabolism dioxygenase TauD, TfdA family	TauD; CAS_like superfamily								4.6711	1.17416	11.4659	0.267891	24.306	8.02254	5.48006	6.60426	1.69084	1.05637	3.97825	0.00307393	42.8006	0.000458597	3.02971	0.00317004	0.829777	1.60061
transport
	Cre02.g095200			chromosome_2:3707005-3714197	(M=1) PTHR19211:SF30 - PREDICTED PROTEIN		ABC transporter	ABCF_EF-3; ABC_ATPase superfamily; ABC_tran_2 superfamily; Uup								5.84099	2.85648	15.7788	2.17283	17.3836	8.99175	13.686	11.8283	6.17613	3.95895	2.04482	0.00561953	7.26187	0.000458597	1.93328	0.00317004	1.15706	1.56004
amino acids
	Cre01.g009350		AIH2	chromosome_1:1743155-1748134	Agmatine iminohydrolase	Converts agmatin to N-carbamoyl-putrescine; involved in agmatine pathway of polyamine (putrescine) biosynthesis; found in soluble mitochondrial proteome	Porphyromonas-type peptidyl-arginine deiminase	Amidinotransf superfamily		AT5G08170.1	porphyromonas-type peptidyl-arginine deiminase family protein					15.8643	6.30667	33.0375	5.8884	16.3827	6.61828	1.58143	3.37771	2.66992	1.63752	2.51548	0.00307393	5.61061	0.000458597	2.47537	0.00317004	0.468196	1.63047
	Cre10.g423550		ATA2	chromosome_10:830260-835431	(M=1) 4.1.2.5 - L-threonine aldolase.		Beta-eliminating lyase	TA_like; AAT_I superfamily; Beta_elim_lyase	glycine biosynthesis?	AT3G04520.1	threonine aldolase 2	YEL046C	GLYcine requiring			20.0019	12.1475	40.9296	10.5233	46.2897	22.5779	16.7914	16.1707	16.71	15.403	1.64659	0.0140123	3.88943	0.000458597	2.05022	0.00317004	1.03838	1.08485
flagella
	Cre02.g090050	FAP170	FAP285	chromosome_2:2247736-2252094	Flagellar Associated Protein	Flagellar Associated Protein; found in the flagellar proteome [PMID: 15998802]; transcript upregulated during flagellar regeneration [PMID: 15738400]. This gene model consolidates two v3 gene models: FAP170 and FAP285; unclear if this gene model should b										43.7235	28.1958	42.1464	17.4552	42.9894	26.2517	45.8383	44.0818	19.155	8.64749	1.55071	0.0303427	2.41455	0.000458597	1.63759	0.048043	1.03985	2.21509
ROS detoxification
	Cre15.g636800		GST12	chromosome_15:499072-503304	(M=5) KOG0867 - Glutathione S-transferase		Glutathione S-transferase, N-terminal domain	Thioredoxin_like superfamily; Gst; GST_N_GTT1_like								48.6034	17.9515	104.94	22.0284	70.9464	25.4755	83.5436	75.3481	49.5042	33.8999	2.70748	0.00307393	4.76385	0.000458597	2.78489	0.00317004	1.10877	1.46031
	Cre12.g550400	GRX2		chromosome_12:8232311-8233936	Glutaredoxin, CPYC type	Glutaredoxin 2, CPYC type glutaredoxin, probably cytosolic. PMID: 16328797	Glutaredoxin	GRX_GRXh_1_2_like; Thioredoxin_like superfamily		AT1G77370.1	Glutaredoxin family protein	YDR513W	GlutaRedoXin			80.8119	48.7566	115.908	49.5836	112.718	58.5931	100.96	118.583	87.6572	80.6536	1.65746	0.0120284	2.33763	0.000458597	1.92374	0.00568854	0.851387	1.08684
	Cre16.g688550	GSTS1	GST1	chromosome_16:3658365-3660578	Glutathione S-transferase	Glutathione S-transferases (Sigma class), Gene expression is induced by various oxidative stress conditions [PMID: 17435007; PLANT SCIENCE 168: 747-759]. Possible prostaglandin-D synthase activity. Previously annotated as GSTS1	Glutathione S-transferase, N-terminal domain; Glutathione S-transferase, C-terminal domain	Thioredoxin_like superfamily; Gst								157.195	31.6324	158.223	21.3672	484.945	39.6183	23.8786	17.4171	34.1156	89.7356	4.96943	0.00307393	7.40495	0.000458597	12.2404	0.00317004	1.37099	0.380179
	Cre02.g093800		NRX3	chromosome_2:2736455-2739124	Nucleoredoxin	Related to animal thioredoxin, nucleoredoxin		Thioredoxin_like superfamily								5.01715	2.38632	10.0525	2.0927	7.8532	4.35679	2.27355	2.50685	2.34982	3.12399	2.10246	0.00992138	4.8036	0.000458597	1.80252	0.0301629	0.906935	0.752186
	Cre02.g093750		NRX2	chromosome_2:2732865-2736347	Nucleoredoxin 2	Nucleoredoxin, nuclear thioredoxin-like protein, contains two thioredoxin motifs with a WCPPC active site in each motif.	Redoxin; AhpC/TSA family	TryX_like_TryX_NRX; Thioredoxin_like superfamily; TryX_like_family								24.6922	6.48211	56.8033	4.52485	52.7795	23.4524	11.4756	14.2341	11.2616	1.92766	3.80928	0.00307393	12.5536	0.000458597	2.25049	0.00317004	0.806205	5.84211
	Cre10.g464850	MSRA5		chromosome_10:6255777-6259485	Peptide methionine sulfoxide reductase	Protein-methionine-S-oxide reductase	Peptide methionine sulfoxide reductase	PMSR superfamily								23.3901	14.3191	26.5725	12.733	41.717	19.6797	12.5572	14.324	14.8233	24.2999	1.63349	0.0289894	2.0869	0.000458597	2.1198	0.00317004	0.876655	0.610015
	Cre13.g588150		VTC2	chromosome_13:3552574-3556962	(M=1) KOG2720 - Predicted hydrolase (HIT family)			PLN03103 superfamily	similar to VTC5 from Arabidopsis	AT5G55120.1	galactose-1-phosphate guanylyltransferase (GDP)s;GDP-D-glucose phosphorylases;quercetin 4'-O-glucosyltransferases					54.8828	24.0597	96.0731	40.5971	77.38	26.7218	15.1058	14.095	76.0837	22.6091	2.28111	0.00307393	2.3665	0.000458597	2.89576	0.00317004	1.07171	3.36518
	Cre12.g559800		GST10	chromosome_12:7010765-7013714	(M=1) PTHR10250 - MICROSOMAL GLUTATHIONE S-TRANSFERASE		MAPEG family	MAPEG superfamily		AT1G65820.1	microsomal glutathione s-transferase, putative					134.979	77.7045	161.132	90.9286	279.237	90.1721	70.1966	81.3569	125.457	96.3384	1.73708	0.00307393	1.77207	0.000458597	3.09671	0.00317004	0.862823	1.30225
	Cre08.g380000		UMM7	chromosome_8:4157609-4164543	(M=1) PTHR10108:SF384 - PREDICTED PROTEIN (FRAGMENT)		Methyltransferase domain; Sulfatase-modifying factor enzyme 1	AdoMet_MTases superfamily; FGE-sulfatase superfamily; DinB_2 superfamily; generic_methyltransferase; Methyltransf_31	mononuclear non-heme iron enzyme catalyzing the oxidative coupling between histidine and cysteine							52.6835	33.8567	70.2828	28.5535	92.0767	39.1152	222.589	130.132	102.402	58.614	1.55607	0.0289894	2.46144	0.000458597	2.35399	0.00317004	1.71049	1.74706
	Cre14.g615100			chromosome_14:1108525-1111249	(M=4) PTHR10173:SF0 - PEPTIDE METHIONINE SULFOXIDE REDUCTASE		SelR domain	SelR superfamily								24.6707	15.4833	32.6758	16.6647	35.7637	14.9223	18.9106	26.0427	29.1975	24.7542	1.59337	0.036295	1.96078	0.000458597	2.39666	0.00317004	0.726138	1.1795
lipid
	Cre16.g663950		ERG3	chromosome_16:2920032-2922957	(M=1) 1.14.21.6 - Lathosterol oxidase.		Fatty acid hydroxylase superfamily	FA_hydroxylase superfamily; ERG3		AT3G02580.1	sterol 1	YLR056W	ERGosterol biosynthesis			40.3106	20.0955	155.303	37.0712	139.065	60.757	162.868	39.8167	72.7268	28.4559	2.00595	0.00307393	4.18932	0.000458597	2.28887	0.00317004	4.09044	2.55577
	Cre07.g346350			chromosome_7:4911872-4916815	(M=8) PTHR10174:SF78 - SEC14 CYTOSOLIC FACTOR FAMILY PROTEIN / PHOSPHOGLYCERIDE TRANSFER FAMILY PROTEIN		CRAL/TRIO domain	SEC14 superfamily								69.3532	31.2759	98.9146	25.5242	73.1744	35.7609	19.5273	14.0617	32.843	41.0074	2.21746	0.00307393	3.87533	0.000458597	2.04621	0.00317004	1.38869	0.800904
endomembrane
	Cre06.g293100			chromosome_6:6497164-6499941	(M=2) PF09177 - Syntaxin 6, N-terminal		Syntaxin 6, N-terminal	Syntaxin-6_N superfamily; t_SNARE superfamily								10.6548	1.63276	29.9629	1.46283	20.1358	8.97905	10.8301	9.43832	4.19109	1.28107	6.52564	0.00307393	20.4828	0.000458597	2.24253	0.00317004	1.14746	3.27155
	Cre04.g224800		VAM4	chromosome_4:2954522-2957612	Endosomal R-SNARE protein, Vamp7/Nyv1-family (R.III)	Endosomal R-SNARE protein, Vamp7/Nyv1-family (R.III). Expressed Protein. Class R.III SNARE, involved in Golgi/PM and Golgi/endosomal trafficking (PMID: 17596510). Most similar to VAMP72-family of land plants, part of 4-member gene family in Chlamydomona	Synaptobrevin	Synaptobrevin superfamily; Longin superfamily				YOR327C	Suppressor of the Null allele of CAP			24.8074	11.1771	53.4717	17.1674	37.5869	17.0533	16.8564	20.5629	14.1363	7.16213	2.21948	0.00307393	3.11472	0.000458597	2.20408	0.00317004	0.819748	1.97376
	Cre01.g051400		ERD2A	chromosome_1:7109945-7112877	KDEL Receptor A	Expressed Protein. Conserved protein similar to KDEL receptor involved in ER retention of lumenal proteins.	ER lumen protein retaining receptor	ER_lumen_recept superfamily		AT3G25040.1	endoplasmic reticulum retention defective 2B	YBL040C	Endoplasmic reticulum Retention Defective			80.2957	50.3566	138.305	50.7951	94.7202	56.6193	28.6537	29.1155	35.3286	45.9575	1.59454	0.0156857	2.7228	0.000458597	1.67293	0.0387012	0.984139	0.768723
	Cre01.g004350		ALIX	chromosome_1:841528-850578	(M=1) K12200 - programmed cell death 6-interacting protein		BRO1-like domain	BRO1_Alix_like superfamily; V_Alix_like superfamily; Extensin_2 superfamily; ALIX_LYPXL_bnd; Pro-rich		AT1G15130.1	Endosomal targeting BRO1-like domain-containing protein	YOR275C	Regulator of IME2			16.6715	10.8386	22.1381	10.6951	18.9254	10.8906	16.4315	15.5484	13.364	14.1483	1.53816	0.0428519	2.06993	0.000458597	1.73777	0.0175038	1.0568	0.944566
carbon metabolism
	Cre03.g149250		ICL2	chromosome_3:1142954-1147575	(M=2) PTHR21631:SF4 - CARBOXYPHOSPHONOENOLPYRUVATE MUTASE		Isocitrate lyase family	ICL_PEPM; TIM_phosphate_binding superfamily		AT2G43180.2	Phosphoenolpyruvate carboxylase family protein					46.5495	26.6589	94.1535	23.8679	86.72	51.2416	35.8591	43.2795	24.786	23.6325	1.74611	0.00307393	3.94478	0.000458597	1.69237	0.0290161	0.828547	1.04881
	Cre01.g053000	GPD2	GPD1	chromosome_1:7373685-7379583	Glycerol-3-phosphate dehydrogenase/dihydroxyacetone-3-phosphate reductase	Glycerol-3-phosphate dehydrogenase/dihydroxyacetone-3-phosphate reductase	NAD-dependent glycerol-3-phosphate dehydrogenase C-terminus; haloacid dehalogenase-like hydrolase; NAD-dependent glycerol-3-phosphate dehydrogenase N-terminus	HAD_like superfamily; NAD_Gly3P_dh_C; NAD_Gly3P_dh_C superfamily; NAD_Gly3P_dh_N; SDR superfamily; Glycerol-3-phosphate_dehydrogenase; Hydrolase								18.3818	5.07642	43.6563	6.7532	29.6825	10.796	59.7511	49.6547	11.9669	25.6687	3.62102	0.00307393	6.46454	0.000458597	2.7494	0.00317004	1.20333	0.466206
	Cre03.g207800		ADH5	chromosome_3:7211785-7215173	(M=2) PTHR11695:SF285 - L-THREONINE 3-DEHYDROGENASE		Alcohol dehydrogenase GroES-like domain; Zinc-binding dehydrogenase	CAD1; MDR superfamily		AT4G37990.1	elicitor-activated gene 3-2	YMR318C	Alcohol DeHydrogenase			30.6443	15.9158	41.0045	7.77353	66.3168	19.9809	17.8612	22.0702	16.082	14.1345	1.9254	0.00307393	5.27489	0.000458597	3.31901	0.00317004	0.80929	1.13778
nucleic acids
	Cre05.g239450			chromosome_5:3153761-3163123	(M=1) PTHR23339:SF29 - PREDICTED PROTEIN (FRAGMENT)		RNA ligase	Adenylation_DNA_ligase_like superfamily; AAA_17; ABC_ATPase superfamily; PTPc superfamily; AAA_33								12.8414	4.77326	22.9223	3.27219	24.1279	12.8819	13.473	15.762	7.6395	1.49534	2.69028	0.00307393	7.00519	0.000458597	1.87301	0.0175038	0.854777	5.10887
	Cre17.g725750			chromosome_17:3584760-3588632	(M=3) PTHR14202 - 60 KDA RIBONUCLEOPROTEIN SSA/RO		TROVE domain									24.7847	7.83883	56.196	4.56538	63.6541	32.4102	20.7649	28.7323	9.62821	2.13387	3.16179	0.00307393	12.3092	0.000458597	1.96401	0.00317004	0.722702	4.51209
	Cre17.g726850			chromosome_17:3681690-3685322	(M=3) PTHR14202 - 60 KDA RIBONUCLEOPROTEIN SSA/RO		TROVE domain	TROVE superfamily; vWFA superfamily								49.3766	32.282	90.3187	24.8704	88.1413	51.6583	29.2619	31.7634	29.4405	14.9	1.52954	0.045239	3.63157	0.000458597	1.70624	0.032896	0.921246	1.97587
	Cre03.g174450		CYCC1	chromosome_3:4268030-4271424				DUF506 superfamily	PD-(D/E)XK nuclease family PMID: 17584917							37.2295	9.308	63.5994	6.39896	90.6003	26.4689	27.8516	27.9456	8.93752	10.5661	3.99973	0.00307393	9.93902	0.000458597	3.4229	0.00317004	0.996636	0.845867
	Cre03.g193250			chromosome_3:6299390-6301499	(M=1) PTHR12684 - PUTATIVE PHOSPHOTRANSFERASE		RNA 2'-phosphotransferase, Tpt1 / KptA family	PTS_2-RNA superfamily		AT2G45330.2	RNA 2'-phosphotransferase, Tpt1 / KptA family	YOL102C				11.5929	6.69211	28.7261	10.5948	25.2752	15.2515	16.7366	18.2456	12.2324	5.14019	1.73232	0.036295	2.71134	0.000458597	1.65723	0.0487176	0.917295	2.37976
	Cre01.g053288			chromosome_1:7418241-7422877	(M=1) 6.5.1.4 - RNA-3'-phosphate cyclase.		RNA 3'-terminal phosphate cyclase (RTC), insert domain; RNA 3'-terminal phosphate cyclase	EPT_RTPC-like superfamily; RNA_3'-terminal_phosphate_cyclase								17.2941	9.94279	36.4193	5.68404	37.7083	17.5749	31.5829	28.9531	14.6742	8.24387	1.73936	0.00992138	6.40729	0.000458597	2.14558	0.00317004	1.09083	1.78001
low CO2
	Cre16.g692800		AKR4	chromosome_16:517642-521704	(M=3) PTHR11732//PTHR11732:SF74 - ALDO/KETO REDUCTASE // SUBFAMILY NOT NAMED		Aldo/keto reductase family	Aldo_ket_red superfamily				YJR096W				17.4212	9.48188	21.181	8.26914	67.6124	8.44859	8.40421	7.20103	11.3412	14.6101	1.83731	0.00307393	2.56145	0.000458597	8.0028	0.00317004	1.16708	0.776258
	Cre11.g467693			chromosome_11:1201261-1206655	(M=5) PF07466 - Protein of unknown function (DUF1517)		Protein of unknown function (DUF1517)	DUF1517 superfamily								14.2521	8.82791	32.5349	7.62241	32.3021	17.659	10.0902	10.907	9.48267	4.96659	1.61444	0.0414981	4.26832	0.000458597	1.82921	0.0175038	0.925112	1.90929
transcription
	Cre07.g321550		BLZ5	chromosome_7:1255641-1260306	(M=15) PF00170 - bZIP transcription factor		bZIP transcription factor	bZIP superfamily								38.9043	25.4017	43.4882	24.5267	63.8443	25.2447	35.7077	35.003	33.2265	39.8556	1.53156	0.0403056	1.7731	0.000458597	2.52902	0.00317004	1.02013	0.833672
signalling
	Cre17.g737050			chromosome_17:5445578-5450409	(M=2) PTHR22957//PTHR22957:SF159 - TBC1 DOMAIN FAMILY MEMBER GTPASE-ACTIVATING PROTEIN		Rab-GTPase-TBC domain	RabGAP-TBC superfamily								40.2517	25.4251	83.3374	32.8759	70.7571	35.7461	23.7279	23.6392	20.2706	20.6328	1.58315	0.0207291	2.53491	0.000458597	1.97944	0.00317004	1.00375	0.982445
chloroplast/Greencut
	Cre11.g468050			chromosome_11:1866543-1871276	(M=2) PF04012 - PspA/IM30 family		PspA/IM30 family	PspA								34.1281	7.33371	95.6871	4.74115	113.454	41.8013	20.4583	24.7095	7.2638	4.01536	4.65359	0.00307393	20.1823	0.000458597	2.71413	0.00317004	0.827953	1.809
	Cre05.g242400	PGR5		chromosome_5:1764548-1766071						AT2G05620.1	proton gradient regulation 5					160.677	79.339	238.715	71.8819	223.565	118.599	118.91	144.846	151.19	118.144	2.0252	0.00307393	3.32093	0.000458597	1.88505	0.00317004	0.820941	1.27971
	Cre11.g467594			chromosome_11:473141-474946	(M=5) KOG1030 - Predicted Ca2+-dependent phospholipid-binding protein		C2 domain	C2 superfamily	lipid binding domain							38.2241	9.75274	14.5102	4.14149	23.073	12.3381	4.89588	2.06947	3.21745	9.46674	3.91932	0.00307393	3.50362	0.000458597	1.87006	0.00317004	2.36577	0.339869
	Cre11.g467593			chromosome_11:470915-472941	(M=5) KOG1030 - Predicted Ca2+-dependent phospholipid-binding protein		C2 domain	C2 superfamily	lipid binding domain							30.0601	7.10524	10.31	3.77337	18.7207	9.57793	6.38755	4.1254	5.21666	5.19854	4.23069	0.00307393	2.73231	0.000458597	1.95457	0.00317004	1.54835	1.00349
	Cre11.g467599			chromosome_11:518777-520575	(M=5) KOG1030 - Predicted Ca2+-dependent phospholipid-binding protein		C2 domain	C2 superfamily	lipid binding domain							30.4111	9.18299	11.0046	2.80081	17.8628	6.97463	5.6243	2.58217	4.47281	8.96026	3.31168	0.00307393	3.92908	0.000458597	2.56111	0.00317004	2.17813	0.499183
	Cre07.g338350	CPLD50		chromosome_7:3782777-3788638	Predicted protein	Conserved protein				AT5G03900.2	Iron-sulphur cluster biosynthesis family protein					26.2733	16.914	36.8332	16.8032	43.8487	19.3917	21.2722	18.424	11.1222	10.9321	1.55335	0.0289894	2.19203	0.000458597	2.26121	0.00317004	1.15459	1.01739
	Cre11.g467601			chromosome_11:520725-522587	(M=5) KOG1030 - Predicted Ca2+-dependent phospholipid-binding protein		C2 domain	C2 superfamily								10.5852	3.90276	4.65598	2.07745	10.1268	4.85565	3.86598	2.70815	2.31196	5.1461	2.71223	0.00307393	2.2412	0.00150228	2.08557	0.00317004	1.42754	0.449264
mitochondrion
	Cre03.g144827			chromosome_3:362035-364121	(M=3) PF07802 - GCK domain		GCK domain	GCK superfamily		AT5G23395.1	Cox19-like CHCH family protein					23.135	14.01	33.264	15.8412	26.1853	15.7475	21.6328	39.9714	15.2894	20.7125	1.65132	0.0352928	2.09984	0.000458597	1.66282	0.0493843	0.541207	0.738173
autophagy/apoptosis
	Cre01.g035450			chromosome_1:5096408-5100565	(M=1) PTHR23291//PTHR23291:SF15 - BAX INHIBITOR-RELATED // UNCHARACTERIZED		Inhibitor of apoptosis-promoting Bax1	LFG_like; BI-1-like superfamily		AT1G03070.2	Bax inhibitor-1 family protein	YNL305C	BaX Inhibitor			35.932	22.7617	59.2601	14.6504	44.8011	23.9244	32.2211	20.3243	25.5445	39.5246	1.57862	0.0207291	4.04495	0.000458597	1.87261	0.0129658	1.58535	0.646294
unclassified / unknown
	Cre10.g425850			chromosome_10:1158095-1161387												61.1544	23.5209	62.5034	14.2885	59.7917	32.0717	14.7052	27.0731	11.456	255.427	2.6	0.00307393	4.37438	0.000458597	1.86431	0.00773763	0.543166	0.0448504
	Cre07.g336900			chromosome_7:3617671-3620862												28.9681	13.7409	58.7115	21.5374	42.4013	21.434	11.5487	14.8511	15.9142	18.0554	2.10817	0.00307393	2.72603	0.000458597	1.97823	0.00317004	0.777633	0.881409
	Cre16.g653650			chromosome_16:1565635-1568027												24.7859	14.9793	43.3947	17.4627	48.3071	23.7771	16.6654	19.0964	18.7278	22.9412	1.65468	0.0170754	2.48499	0.000458597	2.03166	0.00568854	0.872699	0.816339
	Cre06.g278246			chromosome_6:4252505-4255051												9.02671	2.21436	9.94866	2.6247	24.89	6.16344	7.51797	8.85044	6.81682	9.29132	4.07644	0.00307393	3.7904	0.000458597	4.03833	0.00317004	0.849446	0.733676
	Cre12.g495450			chromosome_12:757511-760514												29.213	19.1561	30.2491	15.0297	22.7967	13.7809	14.4355	33.9089	4.80883	7.57757	1.525	0.0484427	2.01262	0.000458597	1.65422	0.043646	0.425714	0.634614
	Cre12.g510500			chromosome_12:1947276-1953180												8.74241	3.7106	18.9535	2.87987	17.8835	10.4835	13.6363	14.0851	9.27124	4.42984	2.35606	0.00307393	6.58137	0.000458597	1.70587	0.048043	0.968137	2.09291
	Cre09.g389060			chromosome_9:3416428-3422460				DUF563 superfamily								7.79505	3.35846	14.4191	4.99658	7.52564	4.25675	4.36223	4.66592	4.70136	4.75962	2.32102	0.00307393	2.88579	0.000458597	1.76793	0.0218061	0.934913	0.98776
	Cre13.g576466			chromosome_13:1953807-1954294												346.97	202.228	522.024	228.049	490.461	270.671	152.794	171.063	338.146	427.337	1.71574	0.00307393	2.28909	0.000458597	1.81202	0.014392	0.893203	0.791287
	Cre07.g333150			chromosome_7:2979853-2982077												20.3871	11.7166	44.9759	11.0606	44.6403	24.5816	22.3315	25.7398	24.3083	33.7427	1.74002	0.0223511	4.06632	0.000458597	1.816	0.00773763	0.867586	0.720402
	Cre02.g079450			chromosome_2:899920-905352												17.8283	10.5367	8.53129	2.78907	27.0181	11.1801	18.1346	12.7601	10.3596	9.87572	1.69202	0.00307393	3.05883	0.000458597	2.41662	0.00317004	1.4212	1.049
	Cre06.g283900			chromosome_6:5398255-5404557	(M=2) PTHR16007 - EPIDIDYMAL MEMBRANE PROTEIN E9-RELATED		Family of unknown function (DUF716)	DUF716 superfamily								19.1088	12.3133	22.4786	8.93848	45.4086	11.093	16.6373	19.4168	6.81645	2.15629	1.55188	0.0330913	2.51481	0.000458597	4.09345	0.00317004	0.856851	3.16119
	Cre12.g551100			chromosome_12:8152567-8155838	(M=1) PF07172 - Glycine rich protein family		Glycine rich protein family			AT2G44870.1						19.7982	11.1044	41.7387	15.407	40.7248	20.7853	15.6409	23.653	19.771	11.6668	1.78291	0.00561953	2.70907	0.000458597	1.95931	0.00317004	0.661265	1.69464
	Cre09.g396500		HAD3	chromosome_9:1752154-1755928	(M=5) PF08282 - haloacid dehalogenase-like hydrolase		haloacid dehalogenase-like hydrolase	HAD_like superfamily; Cof								19.1591	10.4213	35.8046	8.71353	28.975	16.7797	22.0804	24.3181	17.4442	18.809	1.83846	0.00307393	4.10908	0.000458597	1.72679	0.0274424	0.907982	0.927439
	Cre02.g118200			chromosome_2:6726751-6728822	(M=2) KOG4491 - Predicted membrane protein		Integral membrane protein DUF92	DUF92 superfamily								16.2239	6.46979	18.0251	7.91962	24.6365	10.4956	16.6208	12.4169	20.3188	10.4479	2.50764	0.00307393	2.27601	0.000458597	2.34732	0.00317004	1.33856	1.94477
	Cre02.g093600		TEH3	chromosome_2:2716662-2720215	(M=5) PF03061 - Thioesterase superfamily		Thioesterase superfamily	PaaI_thioesterase; hot_dog superfamily				YBL095W	Mitochondrial organization of gene expression			2.61172	0.929991	19.9974	1.45974	8.01197	2.53562	9.46497	2.48636	1.13202	0.89765	2.80833	0.00307393	13.6993	0.000458597	3.15977	0.00317004	3.80676	1.26109
	Cre04.g215600			chromosome_4:1183564-1187831	(M=1) PTHR10108:SF241 - THIOL METHYLTRANSFERASE, PUTATIVE		Thiopurine S-methyltransferase (TPMT)	AdoMet_MTases superfamily		AT2G43940.1	S-adenosyl-L-methionine-dependent methyltransferases superfamily protein					29.5587	18.7815	47.3602	14.8516	74.5522	19.3098	25.0916	27.002	11.3568	10.8323	1.57382	0.0223511	3.1889	0.000458597	3.86085	0.00317004	0.92925	1.04842
	Cre13.g589450			chromosome_13:3741313-3746284	(M=2) PF08487 - Vault protein inter-alpha-trypsin domain		von Willebrand factor type A domain; Vault protein inter-alpha-trypsin domain	vWFA superfamily; VIT superfamily; marine_srt_targ								11.3778	5.8435	17.4876	4.8895	23.7762	11.7047	5.34485	4.29306	2.26444	1.17007	1.94709	0.00307393	3.57656	0.000458597	2.03134	0.00317004	1.245	1.9353
	Cre11.g482650		EZY3	chromosome_11:3687491-3690606												3.85336	0.709157	9.56708	0.650512	13.1956	7.45324	5.62058	2.11538	2.48024	16.678	5.43372	0.00307393	14.707	0.000458597	1.77045	0.0189368	2.65701	0.148713
	Cre02.g095084			chromosome_2:3296944-3298334												9.78927	4.536	18.2585	3.04122	53.5466	29.3078	6.70883	6.63741	3.36737	8.67814	2.15813	0.036295	6.00368	0.000458597	1.82704	0.014392	1.01076	0.388029
	Cre08.g358535			chromosome_8:121923-123755												11.1199	4.97491	13.2364	4.16757	10.2939	5.61402	2.6723	3.19086	4.40049	5.00238	2.2352	0.00561953	3.17605	0.000458597	1.83361	0.0366112	0.837486	0.879679
	Cre16.g673057			chromosome_16:6742301-6745887												15.097	5.34892	17.0718	3.16968	15.7336	7.70493	9.90423	6.24501	4.44475	17.45	2.82244	0.00307393	5.38597	0.000458597	2.04202	0.00317004	1.58594	0.254713
	Cre12.g497950			chromosome_12:3294028-3296240												15.1304	7.93173	22.2878	8.90306	15.8112	7.54869	10.7793	8.19838	5.41609	5.41993	1.90758	0.00992138	2.50339	0.000458597	2.09456	0.00317004	1.31481	0.999292
	Cre07.g325760			chromosome_7:2013739-2019255												5.74441	0.402466	16.2772	0.256871	15.1629	9.08939	9.19614	3.00276	8.1388	19.9411	14.273	0.00307393	63.3672	0.000458597	1.6682	0.0483851	3.06256	0.408142
	Cre13.g588800			chromosome_13:3660392-3663439												21.6177	13.978	45.8973	17.1767	26.3653	15.1635	2.7123	2.80787	5.86203	9.86235	1.54655	0.046262	2.67207	0.000458597	1.73873	0.0218061	0.965964	0.594385
	Cre06.g298850			chromosome_6:7319550-7325842				DUF4400 superfamily								8.212	4.99624	15.7439	4.57877	17.1909	9.76114	12.8114	12.3683	5.82528	3.13153	1.64364	0.0189289	3.43846	0.000458597	1.76116	0.0258733	1.03583	1.8602
	Cre12.g535400			chromosome_12:6061079-6066935												6.17652	2.87327	10.7715	2.83933	13.927	7.70381	12.9633	14.4435	6.17691	2.6916	2.14965	0.00307393	3.79368	0.000458597	1.80781	0.0129658	0.897518	2.29488
	Cre02.g073600			chromosome_2:70051-72825												12.6884	7.50051	35.6612	3.7866	32.8445	18.047	15.1482	12.2141	16.1622	39.4788	1.69167	0.0472641	9.41774	0.000458597	1.81994	0.0203486	1.24022	0.409389
	Cre07.g321750			chromosome_7:1278083-1281501												12.0418	1.40571	1.21162	0.212229	3.11845	1.32798	2.79139	4.06926	0.543222	41.3188	8.56635	0.00307393	5.70902	0.00404334	2.34827	0.0258733	0.68597	0.0131471
	Cre10.g464200			chromosome_10:6181294-6189780												10.7558	6.59342	10.3443	6.33661	12.5702	6.2865	9.59138	9.2813	7.13897	6.26968	1.63129	0.00799222	1.63247	0.00212198	1.99955	0.00317004	1.03341	1.13865
	Cre11.g477200		IFR1	chromosome_11:2758884-2763754	(M=1) PTHR14194//PTHR14194:SF8 - NITROGEN METABOLIC REGULATION PROTEIN NMR-RELATED // SUBFAMILY NOT NAMED		NmrA-like family	SDR superfamily; NAD_binding_10; PCBER_SDR_a		AT1G75290.1	NAD(P)-binding Rossmann-fold superfamily protein					8.04672	0.791082	2.16793	0.603494	312.731	8.81472	0.516929	0.339481	1.04152	1.48388	10.1718	0.00307393	3.5923	0.00150228	35.4783	0.00317004	1.5227	0.70189
	Cre04.g217930			chromosome_4:489535-496081	(M=1) PTHR21068:SF12 - PREDICTED PROTEIN		Senescence-associated protein	Senescence superfamily		AT4G35985.1	Senescence/dehydration-associated protein-related					8.92856	5.38353	17.7021	6.39862	12.628	6.39535	9.27512	7.89974	5.06666	4.70464	1.6585	0.0170754	2.76655	0.000458597	1.97456	0.00317004	1.1741	1.07695

## Sheet: down_in_all_strains
														FPKM										Fold change
								MBH = mutual best hit based on BLAST search						Ni						Cu
														crr1		CRR1		cys		4532		CRR1	crr1	Ni						Cu
gene	symbol	aliases	location	defline	description	PFAM	CDD	Arabidopsis MBH	Description	yeast MBH	Description			plus	minus	plus	minus	plus	minus	minus	plus	minus	minus	crr1	q value	CRR1	q value	cys	q value	4532	CRR1/crr1
Cre09.g397623			chromosome_9:4859323-4863310											4.87828	8.26053	0.81819	8.26917	5.35821	10.954	1.31456	3.37533	1.43218	26.0306	0.590553	0.0428519	0.0989446	0.000458597	0.489156	0.00317004	0.389461	0.0550191
Cre12.g488450		VSP3	chromosome_12:1359263-1361787	Extracellular matrix protein	Extracellular matrix protein (vegetative cell wall protein) similar to ISG (Volvox carteri) [PMID: 1600938], both are glycoproteins with a hydroxyproline-rich (HR) domain. [PMID: 8000007. ISG Genbank entry X65165; VSP3, L29029; C. incerta ortholog, AY7950		DUF1355 superfamily							2.51816	11.8763	2.8933	10.5229	7.65723	20.3968	4.87489	3.25636	18.6574	2.96866	0.212032	0.00307393	0.274953	0.000458597	0.375413	0.00317004	1.49704	6.28479
Cre08.g359250			chromosome_8:538340-541822											14.0783	27.2834	4.27255	12.347	8.00276	14.4284	4.47104	2.60358	21.8082	21.4998	0.516002	0.00307393	0.34604	0.000458597	0.554653	0.0189368	1.71727	1.01434
Cre16.g693600	FAP137	ISG-C4	chromosome_16:387522-392944	Hydroxyproline-rich cell wall protein	Putative extracellular matrix protein (cell wall protein); similar to Volvox ISG [PMID: 1600938]) and Chlamydomonas VSP-3 [PMID: 8000007], two glycoproteins with a hydroxyproline-rich (HR) domain; ISG Genbank entry X65165; VSP-3 Genbank entry AY795084. Al									47.5837	88.6329	32.8969	81.2624	43.3302	75.4374	63.3802	61.9111	73.3623	53.4867	0.536863	0.00307393	0.404823	0.000458597	0.574386	0.0203486	1.02373	1.3716
Cre13.g585000			chromosome_13:3124718-3130345				SBP56 superfamily							9.99609	20.0804	1.31632	3.05693	1.15012	2.33918	1.02343	2.10175	9.06828	0.793767	0.497803	0.00307393	0.430602	0.000458597	0.491677	0.0392509	0.486942	11.4244
Cre12.g487700			chromosome_12:1452618-1459380											6.88109	10.8227	6.28094	14.5254	8.73107	16.6041	23.3706	25.7155	12.3067	17.5109	0.635802	0.0315022	0.432411	0.000458597	0.525838	0.00317004	0.908814	0.702802
Cre08.g363100			chromosome_8:1184862-1197841	(M=2) PTHR23301 - CHITIN BINDING PERITROPHIN-A		Chitin binding Peritrophin-A domain	CBM_14 superfamily			YDR249C	Putative protein of unknown function			4.46727	10.4074	1.08152	5.12902	1.11743	2.43898	0.327686	0.307429	1.45017	0.681474	0.42924	0.00307393	0.210863	0.000458597	0.458155	0.00317004	1.06589	2.12799
Cre03.g144564		MMP13	chromosome_3:290353-295831	Matrix metalloproteinase	Matrix metalloproteinase belonging to the M11 peptidase family	Gametolysin peptidase M11	Peptidase_M7 superfamily							9.86349	33.3732	4.33768	25.8473	8.18425	23.262	19.9439	19.0499	15.4285	11.3327	0.295551	0.00307393	0.167819	0.000458597	0.351829	0.00317004	1.04693	1.36141
Cre24.g755997	FAP150	PHC18	scaffold_24:118245-122121	Cell wall protein pherophorin-C18	Pherophorin-C18 (PHC18) [PMID: 16367971]; partial sequence similar to extracellular matrix protein (cell wall protein) pherophorin-C5 [Genbank entry DQ196111], which belongs to the large pherophorin-family, a family of glycoproteins with a central hydroxy	Pherophorin	DUF3707 superfamily							41.0665	130.455	30.1285	222.896	21.6963	88.8054	85.9269	165.852	406.019	1.70948	0.314794	0.00307393	0.135168	0.000458597	0.244313	0.00317004	0.518094	237.51
Cre05.g238650		PHC5	chromosome_5:3034209-3039095	Cell wall protein pherophorin-C5	Pherophorin-C5 (PHC5) [PMID: 16367971; Genbank entry DQ196111]; extracellular matrix protein (cell wall protein); belongs to the large pherophorin-family, a family of glycoproteins with a central hydroxyproline-rich (HR) domain. (partial sequence, codes o	Pherophorin	DUF3707 superfamily							49.9333	178.254	20.7705	116.797	33.4669	85.354	42.9349	49.0895	76.3039	18.6963	0.280124	0.00307393	0.177834	0.000458597	0.392095	0.00317004	0.874625	4.08123
Cre17.g717900		PHC1	chromosome_17:2693360-2696479	Cell wall protein pherophorin-C1	Pherophorin-C1 (PHC1) [PMID: 16367971; Genbank entry DQ196107]; extracellular matrix protein (cell wall protein); belongs to the large pherophorin-family, a family of glycoproteins with a central hydroxyproline-rich (HR) domain. (partial sequence; due to	Pherophorin	DUF3707 superfamily							53.8064	173.166	20.8538	95.3824	61.3436	152.483	100.819	121.521	116.788	122.969	0.310722	0.00307393	0.218634	0.000458597	0.402298	0.00317004	0.829643	0.949735
Cre02.g094450		PHC21	chromosome_2:2808945-2813363	Cell wall protein pherophorin-C21	Pherophorin-C21 (PHC21) [PMID: 16367971]; partial sequence similar to extracellular matrix protein (cell wall protein) pherophorin-C5 [Genbank entry DQ196111], which belongs to the large pherophorin-family, a family of glycoproteins with a central hydroxy	Pherophorin	DUF3707 superfamily							30.9214	79.2197	20.5617	49.3016	41.0412	79.7973	66.449	68.5836	65.4402	35.0132	0.390325	0.00307393	0.417059	0.000458597	0.514318	0.00773763	0.968876	1.86902
Cre02.g095095		PHC12	chromosome_2:3345374-3351647	Cell wall protein pherophorin-C12	Pherophorin-C12 (PHC12) [PMID: 16367971]; very similar to extracellular matrix protein (cell wall protein) pherophorin-C6 [Genbank entry DQ196112], which belongs to the large pherophorin-family, a family of glycoproteins with a central hydroxyproline-rich	Pherophorin	DUF3707 superfamily							18.584	34.2096	8.66884	17.6145	12.5669	23.6521	32.3684	40.6597	29.032	35.488	0.543239	0.00307393	0.492142	0.000458597	0.531323	0.00317004	0.796081	0.818079
